# Supplementary material for: Development of a Metabolic Subtype Classifier for Low- Grade Glioma to Guide Precision Therapy
Source: Research Square preprint supplement (doi:10.21203/rs.3.rs-7778086/v1), 2025-12-16
Supplement: Supplementary file 1 [file 09be2bc21d795c153456ec03.docx]

Datasets:

1. TCGA-LGG
   source: GDC database (Genomic Data Commons, https://portal.gdc.cancer.gov/)
2. CGGA-LGG
   source: CGGA database (Chinese Glioma Genome Atlas, https://www.cgga.org.cn/download.jsp)
3. Rembrandt
   source: CGGA database (Chinese Glioma Genome Atlas, https://www.cgga.org.cn/download_other.jsp)
4. PMID: 38363834
   source: Pubmed database (https://pmc.ncbi.nlm.nih.gov/articles/PMC10871530/#sec23)
