# Supplementary material for: Development of a Metabolic Subtype Classifier for Low- Grade Glioma to Guide Precision Therapy
Source: Research Square preprint supplement (doi:10.21203/rs.3.rs-7778086/v1), 2025-12-16
Supplement: Supplementary file 2 [file adk1721_Data_S1.xlsx]

## Sheet:  Patients in Cohort 1
Clinical information of 21 patients in cohort 1
Patient ID	Gender	Age	BMI	Pathology	WHO grade	Ki-67 positivity rate	ATRX mutation status	P53 mutation status	IDHI mutation status	TERT promoter mutation status	MGMT promoter methylation	1p/19q Codeletion status
LP01	Male	73	20.7612	AA	III	0.4	Mutant	Mutant	Wildtype	Wildtype	Unmethylated	Non-codeleted
LP02	Male	53	23.3887	AO	III	0.25	Mutant	Wildtype	Mutant	Mutant	Methylated	Codeleted
LP03	Male	53	22.5534	A	II	0.02	Mutant	Wildtype	Wildtype	Mutant	Methylated	Non-codeleted
LP04	Male	63	28.6851	GBM	IV	0.15	Mutant	Wildtype	Wildtype	Mutant	Unmethylated	Non-codeleted
LP05	Female	55	17.4818	GBM	IV	0.2	Wildtype	Wildtype	Wildtype	Mutant	Unmethylated	Non-codeleted
LP06	Male	55	22.921	AO	III	0.1	Mutant	Wildtype	Mutant	Mutant	Methylated	Codeleted
LP07	Male	43	31.2406	AO	III	0.1	Mutant	Wildtype	Mutant	Mutant	Methylated	Codeleted
LP08	Male	51	29.4078	AA	III	0.4	Mutant	Mutant	Wildtype	Mutant	Unmethylated	Non-codeleted
LP09	Male	55	20.7612	GBM	IV	0.3	Mutant	Wildtype	Wildtype	Mutant	Unmethylated	Non-codeleted
LP10	Male	35	22.0932	O	II	0.03	Mutant	Wildtype	Mutant	Mutant	Methylated	Codeleted
LP11	Male	57	22.4712	GBM	IV	0.2	Mutant	Wildtype	Wildtype	Wildtype	Methylated	Non-codeleted
LP12	Male	41	22.4712	GBM	IV	0.25	Mutant	Wildtype	Wildtype	Wildtype	Unmethylated	Non-codeleted
LP13	Male	46	31.0204	A	II	0.05	Wildtype	Mutant	Mutant	Wildtype	Methylated	Non-codeleted
LP14	Female	55	23.4375	GBM	IV	0.3	Mutant	Wildtype	Wildtype	Wildtype	Unmethylated	Non-codeleted
LP15	Male	49	24.6914	AO	III	0.2	Mutant	Wildtype	Mutant	Mutant	Unmethylated	Codeleted
LP16	Female	60	21.0303	GBM	IV	0.4	Mutant	Mutant	Wildtype	Wildtype	Unmethylated	Non-codeleted
LP17	Male	52	24.2215	GBM	IV	0.3	Mutant	Wildtype	Wildtype	Mutant	Unmethylated	Non-codeleted
LP18	Male	72	25.3815	GBM	IV	0.3	Mutant	Mutant	Wildtype	Mutant	Methylated	Non-codeleted
LP19	Female	52	23.4375	GBM	IV	0.4	Mutant	Wildtype	Wildtype	Wildtype	Unmethylated	Non-codeleted
LP20	Female	59	19.9219	AO	III	0.1	Mutant	Mutant	Mutant	Mutant	Methylated	Codeleted
LP21	Male	41	24.2424	A	II	0.05	Wildtype	Mutant	Mutant	Wildtype	Unmethylated	Non-codeleted
A: Astrocytoma
AA: Anaplastic astrocytoma
AO: Anaplastic oligodendroglioma
BMI: Body mass index
GBM: Glioblastoma
O: Oligodendroglioma

## Sheet: Patients in Cohort 2
Clinical information of 28 patients in cohort 2 ( 25 glioma patients and 3 non-glioma patients)
Glioma patients for collecting glioma tissues
Patient ID	Gender	Age	BMI	Pathology	WHO grade	Ki-67 positivity rate	ATRX mutation status	P53 mutation status	IDHI mutation status	TERT promoter mutation status	MGMT promoter methylation	1p/19q Codeletion status
T01	Male	73	20.7612	AA	III	0.4	Mutant	Mutant	Wildtype	Wildtype	Unmethylated	Non-codeleted
T02	Male	53	23.3887	AO	III	0.25	Mutant	Wildtype	Mutant	Mutant	Methylated	Codeleted
T03	Male	53	22.5534	A	II	0.02	Mutant	Wildtype	Wildtype	Mutant	Methylated	Non-codeleted
T04	Male	33	27.2509	A	II	0.03	Wildtype	Mutant	Mutant	Wildtype	Methylated	Non-codeleted
T05	Male	63	28.6851	GBM	IV	0.15	Mutant	Wildtype	Wildtype	Mutant	Unmethylated	Non-codeleted
T06	Female	55	17.4818	GBM	IV	0.2	Wildtype	Wildtype	Wildtype	Mutant	Unmethylated	Non-codeleted
T07	Male	55	22.921	AO	III	0.1	Mutant	Wildtype	Mutant	Mutant	Methylated	Codeleted
T08	Male	43	31.2406	AO	III	0.1	Mutant	Wildtype	Mutant	Mutant	Methylated	Codeleted
T09	Male	79	25.7117	GBM	IV	0.2	Mutant	Mutant	Wildtype	Mutant	Methylated	Non-codeleted
T10	Male	51	29.4078	AA	III	0.4	Mutant	Mutant	Wildtype	Mutant	Unmethylated	Non-codeleted
T11	Male	36	21.2585	A	II	0.03	Wildtype	Wildtype	Mutant	Wildtype	Methylated	Non-codeleted
T12	Male	71	20.7612	GBM	IV	0.2	Mutant	Mutant	Wildtype	Wildtype	Unmethylated	Non-codeleted
T13	Male	55	20.7612	GBM	IV	0.3	Mutant	Wildtype	Wildtype	Mutant	Unmethylated	Non-codeleted
T14	Male	50	23.7387	AA	III	0.2	Wildtype	Wildtype	Wildtype	Mutant	Methylated	Non-codeleted
T15	Male	57	22.4712	GBM	IV	0.2	Mutant	Wildtype	Wildtype	Wildtype	Methylated	Non-codeleted
T16	Male	41	22.4712	GBM	IV	0.25	Mutant	Wildtype	Wildtype	Wildtype	Unmethylated	Non-codeleted
T17	Male	46	31.0204	A	II	0.05	Wildtype	Mutant	Mutant	Wildtype	Methylated	Non-codeleted
T18	Female	70	18.6453	GBM	IV	NA	Mutant	Mutant	Wildtype	Mutant	Methylated	Non-codeleted
T19	Male	49	24.6914	AO	III	0.2	Mutant	Wildtype	Mutant	Mutant	Unmethylated	Codeleted
T20	Male	52	24.2215	GBM	IV	0.3	Mutant	Wildtype	Wildtype	Mutant	Unmethylated	Non-codeleted
T21	Female	52	23.4375	GBM	IV	0.4	Mutant	Wildtype	Wildtype	Wildtype	Unmethylated	Non-codeleted
T22	Female	59	19.9219	AO	III	0.1	Mutant	Mutant	Mutant	Mutant	Methylated	Codeleted
T23	Female	45	23.4375	GBM	IV	0.2	Mutant	Wildtype	Wildtype	Mutant	Unmethylated	Non-codeleted
T24	Male	41	24.2424	A	II	0.05	Wildtype	Mutant	Mutant	Wildtype	Unmethylated	Non-codeleted
Glioma patients for collecting peritumoral brain tissues
Patient ID	Gender	Age	BMI
P01	Male	63	28.6851
P02	Male	71	20.7612
P03	Male	41	22.4712
P04	Male	72	25.3815
P05	Female	45	23.4375
Non-glioma patients for collecting normal brain tissues
Patient ID	Gender	Age	BMI	Diagnosis
N01	Female	59	22.2222	Ruptured intracranial aneurysm
N02	Male	71	25.9516	Ruptured intracranial aneurysm
N03	Male	17	22.8931	Idiopathic generalized epilepsy
A: Astrocytoma
AA: Anaplastic astrocytoma
AO: Anaplastic oligodendroglioma
BMI: Body mass index
GBM: Glioblastoma

## Sheet: Patients in Cohort 3
Clinical information of 49 patients in cohort 3 ( 24 glioma patients and 25 non-glioma patients)
Glioma patients
Patient ID	Gender	Age	BMI	Pathology	WHO grade	Ki-67 positivity rate	ATRX mutation status	P53 mutation status	IDHI mutation status	TERT promoter mutation status	MGMT promoter methylation	1p/19q Codeletion status
G01	Male	33	21.3039	A	II	0.05	Mutant	Wildtype	Mutant	Mutant	Methylated	Non-codeleted
G02	Female	33	20.4382	GBM	IV	0.8	Wildtype	Mutant	Mutant	Wildtype	Methylated	Non-codeleted
G03	Female	35	19.8141	AO	III	0.08	Wildtype	Wildtype	Wildtype	NA	NA	NA
G04	Female	40	25.1532	AO	III	0.2	Mutant	Wildtype	Mutant	Mutant	Methylated	Codeleted
G05	Female	42	21.0077	A	II	0.02	Mutant	Wildtype	Mutant	Wildtype	Unmethylated	Non-codeleted
G06	Female	42	26.6193	GBM	IV	NA	NA	NA	NA	NA	NA	NA
G07	Female	42	21.3039	A	II	0.02	Mutant	Wildtype	Mutant	Wildtype	Methylated	Non-codeleted
G08	Female	46	24.0346	AO	III	0.3	Mutant	Mutant	Mutant	Wildtype	Methylated	Codeleted
G09	Female	48	22.4059	A	II	0.05	Mutant	Wildtype	Mutant	Mutant	Unmethylated	Non-codeleted
G10	Male	49	26.7755	AO	III	0.2	Mutant	Wildtype	Mutant	Wildtype	Methylated	Codeleted
G11	Male	50	21.4844	HGG	III	NA	NA	NA	NA	NA	NA	NA
G12	Female	52	22.8928	GBM	IV	0.4	Mutant	Wildtype	Wildtype	Wildtype	Methylated	Non-codeleted
G13	Male	54	24.2123	GBM	IV	0.4	Mutant	Wildtype	Wildtype	Wildtype	Unmethylated	Non-codeleted
G14	Male	55	24.2215	O	II	0.2	Mutant	Wildtype	Mutant	Mutant	Methylated	Codeleted
G15	Female	55	22.0711	O	II	0.05	Mutant	Wildtype	Mutant	Mutant	Methylated	Codeleted
G16	Male	58	19.8177	GBM	IV	0.3	Mutant	Wildtype	Wildtype	Mutant	Methylated	Non-codeleted
G17	Female	58	21.3675	GBM	IV	0.7	Mutant	Wildtype	Wildtype	Mutant	Unmethylated	Non-codeleted
G18	Female	60	23.8751	GBM	IV	0.4	Mutant	Wildtype	Wildtype	Wildtype	Methylated	Non-codeleted
G19	Male	63	32.872	GBM	IV	0.15	Mutant	Wildtype	Mutant	Mutant	Unmethylated	Non-codeleted
G20	Female	64	20.0288	GBM	IV	0.4	Mutant	Wildtype	Mutant	Wildtype	Unmethylated	Non-codeleted
G21	Female	65	26.0776	GBM	IV	0.3	Mutant	Wildtype	Wildtype	Wildtype	Methylated	Non-codeleted
G22	Female	67	21.4844	GBM	IV	0.2	Mutant	Wildtype	Wildtype	Mutant	Unmethylated	Non-codeleted
G23	Male	69	23.4375	GBM	IV	0.8	Wildtype	Mutant	Wildtype	Mutant	Unmethylated	Non-codeleted
G24	Male	72	29.3878	GBM	IV	0.4	Mutant	Wildtype	Wildtype	Mutant	Unmethylated	Non-codeleted
Hemifacial spasm patients
Patient ID	Gender	Age	BMI	Pathology
F01	Female	54	26.7094	HFS
F02	Female	42	23.1111	HFS
F03	Male	52	23.7387	HFS
F04	Female	54	22.8624	HFS
F05	Male	49	23.3887	HFS
F06	Female	36	21.7555	HFS
F07	Male	50	21.2585	HFS
F08	Male	53	20.3125	HFS
F09	Female	49	20.5457	HFS
F10	Male	46	20.2449	HFS
F11	Female	60	25.7812	HFS
F12	Female	54	22.1003	HFS
F13	Female	61	19.1001	HFS
F15	Female	56	26.0262	HFS
F14	Female	70	18.4911	HFS
F16	Male	45	25.9516	HFS
F17	Male	46	20.1956	HFS
F18	Female	58	26.3146	HFS
F19	Female	65	31.25	HFS
F20	Female	43	27.3438	HFS
F21	Female	47	23.2335	HFS
F22	Male	40	24.4898	HFS
F23	Female	60	25.3906	HFS
F24	Female	67	22.719	HFS
F25	Female	35	27.9267	HFS
A: Astrocytoma
AO: Anaplastic oligodendroglioma
BMI: Body mass index
GBM: Glioblastoma
HFS: Hemifacial spasm
HGG: High grade glioma
NA: Not available
O: Oligodendroglioma

## Sheet: Patients in Cohort 4
Clinical information of 20 patients in cohort 4 ( 10 glioma patients and 10 non-glioma patients)
Glioma patients
Patient ID	Gender	Age	BMI	Pathology	WHO grade	Ki-67 positivity rate	ATRX mutation status	P53 mutation status	IDHI mutation status	TERT promoter mutation status	MGMT promoter methylation	1p/19q Codeletion status
VD01	Male	44	23.5294	GBM	IV	0.03	Mutant	Wildtype	Wildtype	Mutant	Unmethylated	Non-codeleted
VD02	Female	50	20.8117	GBM	IV	0.5	Mutant	Wildtype	Wildtype	Mutant	Unmethylated	Non-codeleted
VD03	Female	75	27.3438	GBM	IV	0.1	Mutant	Wildtype	Wildtype	Wildtype	Methylated	Non-codeleted
VD04	Male	57	21.7079	GBM	IV	0.2	Mutant	Mutant	Wildtype	Wildtype	Unmethylated	Non-codeleted
VD05	Female	69	22.0386	GBM	IV	0.4	Mutant	Mutant	Wildtype	Mutant	Methylated	Non-codeleted
VD06	Female	70	21.4844	GBM	IV	0.3	Mutant	Wildtype	Wildtype	Mutant	Unmethylated	Non-codeleted
VD07	Female	67	20.5049	GBM	IV	0.2	Mutant	Wildtype	Wildtype	Wildtype	Methylated	Non-codeleted
VD08	Female	42	26.6667	AO	III	0.1	Mutant	Wildtype	Mutant	Mutant	Methylated	Codeleted
VD09	Female	52	22.0317	GBM	IV	0.6	Mutant	Mutant	Wildtype	Mutant	Methylated	Non-codeleted
VD10	Male	66	24.2215	GBM	IV	0.3	Mutant	Wildtype	Wildtype	Mutant	Unmethylated	Non-codeleted
Non-glioma patients
Patient ID	Gender	Diagnosis	Age	BMI
VC01	Female	HFS	63	22.0317
VC02	Female	HFS	54	23.7954
VC03	Female	HFS	61	22.4766
VC04	Female	TN	63	17.7778
VC05	Female	TN	67	22.9591
VC06	Male	TN	48	19.5918
VC07	Female	HFS	56	22.7583
VC08	Female	TN	64	23.4375
VC09	Male	GPN	54	23.1405
VC10	Female	HFS	62	23.6244
AO: Anaplastic oligodendroglioma
BMI: Body mass index
GBM: Glioblastoma
GPN: Glossopharyngeal neuralgia
HFS: hemifacial spasm
TN: trigeminal neuralgia

## Sheet: Summary
Cohort 1				Cohort 2							Cohort 3						Cohort 4
Patients (n =21)				Category	Glioma Tissue (n = 24)	Peritumoral tissue (n = 5)	Normal Tissue (n = 3)	P			Category	Facial spasm (n = 25)	Glioma (n = 24)	P			Category	Facial spasm (n = 10)	Glioma (n = 10)	P
Sex, no. (%)				Sex, no. (%)				0.8798			Sex, no. (%)			0.917			Sex, no. (%)			>0.9999
Male	16 (76.20%)			Male	19 (79.16%)	4 (80.00%)	2 (66.67%)				Male	8 (29.63%)	9 (37.93%)				Male	2 (20.00%)	3 (30.00%)
Female	5 (23.80%)			Female	5 (20.83%)	1 (20.00%)	1 (33.33%)				Female	17 (70.37%)	15 (62.07%)				Female	8 (80.00%)	7 (70.00%)
Age, year				Age, year				0.6307			Age, year			0.8702			Age, year			>0.9999
Mean ± SD	53.3 ± 9.2			Mean ± SD	53.4 ± 11.3	58.4 ± 13.0	49 ± 23.2				Mean ± SD	51.7 ± 9.0	52.2 ± 11.2				Mean ± SD	59.2 ± 5.9	59.2 ± 11.7
Median (IQR)	53.0 (49.0-57.0)			Median (IQR)	52.5 (45.7-57.5)	63.0 (45.0-71.0)	59.0 (38.0-65.0)				Median (IQR)	52.0 (46.0-58.0)	53.0 (42.0-60.8)				Median (IQR)	61.5 (54.5-63)	61.5 (50.5-68.5)
Range	35.0-73.0			Range	33.0-79.0	41.0-72.0	17.0-71.0				Range	35.0-70.0	33.0-72.0				Range	48.0-67.0	42.0-75.0
BMI, kg/m2				BMI, kg/m2				0.9733			BMI, kg/m2			0.834			BMI, kg/m2			0.3806
Mean ± SD	23.9 ± 3.5			Mean ± SD	23.7 ± 3.5	24.1 ± 2.7	23.7 ± 1.6				Mean ± SD	23.6 ± 3.0	23.4 ± 3.1				Mean ± SD	22.2 ± 2.0	23.0 ± 2.4
Median(IQR)	23.4 (22.1-24.7)			Median(IQR)	23.4 (21.1-24.9)	23.4 (22.5-25.4)	22.9 (22.6-24.4)				Median(IQR)	23.2 (21.3-26.0)	22.6 (21.3-24.5)				Median(IQR)	22.9 (22.1-23.4)	22.0 (21.5-24.0)
Range	17.5-31.0			Range	17.5-31.2	20.8-28.7	22.2-26.0				Range	18.5-31.3	19.8-32.9				Range	17.8-23.8	20.5-27.3
WHO grading				WHO grading							WHO grading						WHO grading
II	4			II	5	-	-				II	N/A	6				III	N/A	1
III	7			III	8	-	-				III	N/A	5				IV	N/A	9
IV	10			IV	11	5	-				IV	N/A	13
