# Supplementary material for: Development of a Metabolic Subtype Classifier for Low- Grade Glioma to Guide Precision Therapy
Source: Research Square preprint supplement (doi:10.21203/rs.3.rs-7778086/v1), 2025-12-16
Supplement: Supplementary file 3 [file pieTable.pdf › original data_lgg&metabolism/11.clinical/1.clusterClipie/pieTable.pdf]

tabolismclus

Grade

Death

Gender

Age

Histological

C1  
(n = 423)

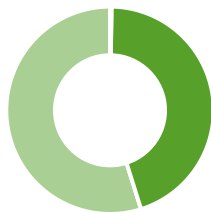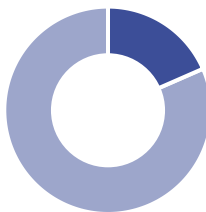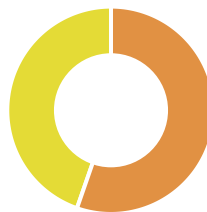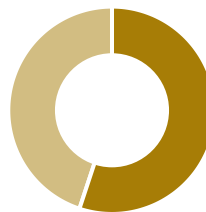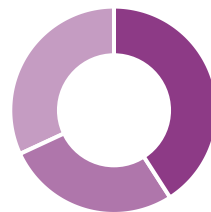

C2  
(n = 83)

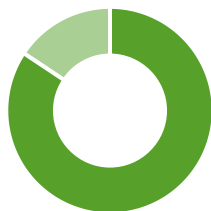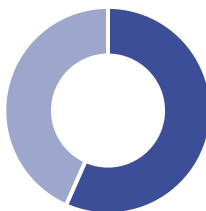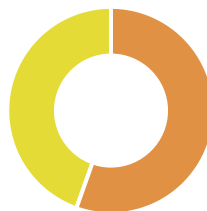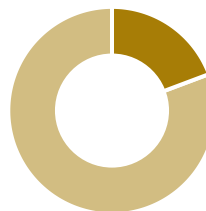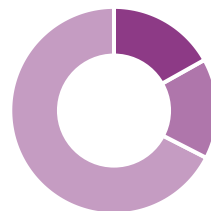

p = 2.2e-11

p = 4.6e-13

p = 1

p = 1.5e-09

p = 1.2e-08

■ G2 ■ G3

■ No ■ Yes

■ FEMALE ■ MALE

■ ≤40 ■ >40

■ Astrocytoma ■ Oligoastrocytoma ■ Oligodendroglioma
