# Supplementary material for: Development of a Metabolic Subtype Classifier for Low- Grade Glioma to Guide Precision Therapy
Source: Research Square preprint supplement (doi:10.21203/rs.3.rs-7778086/v1), 2025-12-16
Supplement: Supplementary file 4 [file adk1721_Data_S2.xlsx]

## Sheet: Cohort 1
Normalized iBAQ values of 393 quantified proteins in Cohort 1
Sample	Serum	Patient	IGKV3-7	IGLV4-69	IGLV2-18	IGLV3-10	IGKV2-28	IGLV5-45	IGHV3-49	IGKV6D-21	IGHV6-1	IGHV3-15	IGHV3-21	IGHV2-26	IGHV3-43	IGHV3-72	IGKV3D-20	IGHV1-3	IGHV1-18	IGHV1-24	IGHV4-28	IGHV2-70D	IGKV1-8	IGKV2-24	IGHV3-64D	IGLC7	IGKV2-29	MASP2	QSOX1	CHL1	APOL1	CD5L	FCN3	ATRN	APOM	CP	F13A1	F2	C1R	HP	HPR	F9	F10	CFD	PLG	F12	CFB	CA1	CA2
LP01_gA	gA	LP01	800808	65059.3	316479	223650	844330	145796	143155	76883.9	54519.7	1.13338e+06	22721.2	11172	31899	350915	83535.4	745189	173062	2.85404e+06	52371.3	38864	571270	711897	283792	60025.5	780843	7010.83	12595.3	1811.45	696959	1.2708e+06	394501	132499	544988	5.07597e+06	69379.9	3.50889e+06	949924	2.68924e+07	899323	98915.3	112053	203259	4.55893e+06	377399	4.40813e+06	1.5162e+06	198672
LP01_pV	pV	LP01	1.13338e+06	155202	316479	198672	745189	247960	165985	110030	14192	822361	15885.7	14807.9	68253.8	176523	86912.6	681694	223650	2.96176e+06	46936.7	23156.6	484181	638968	206999	124807	1.5162e+06	18211.2	19001.5	3901.64	763685	1.17805e+06	413187	151915	726894	5.28361e+06	122068	3.36421e+06	862363	4.81019e+07	899323	145796	117151	260010	4.55893e+06	423774	4.11681e+06	173062	19376
LP01_gV	gV	LP01	1.2708e+06	96927.8	441968	413187	1.13338e+06	70636.7	108038	81887	37902	1.92916e+06	17163.6	34669.5	31899	198672	169710	484181	423774	1776350	100678	38864	247960	583710	52371.3	76883.9	544988	15587	6322.51	3253.67	822361	1.57114e+06	260010	104905	876733	4.86127e+06	84990.5	3.61697e+06	862363	3.3532e+07	1.22365e+06	63703.3	117151	242742	3.25244e+06	504132	4.70572e+06	1.03297e+06	73626.5
LP02_gA	gA	LP02	91026	191076	343731	544988	822361	76883.9	235653	44923.2	54519.7	1.09387e+06	33168	30557.9	33811.5	122068	148278	921444	283792	1.69769e+06	48870	47946.5	598542	367137	159186	462368	1.41811e+06	15885.7	10115.7	3132.37	1.2708e+06	484181	451065	132499	899323	4.70572e+06	61193	3834200	1.03297e+06	3.3532e+07	1.17805e+06	113792	120032	185911	5.28361e+06	528931	4.11681e+06	218445	17527.4
LP02_pV	pV	LP02	1.03297e+06	143155	296010	559764	899323	129336	253316	53579.9	54519.7	1.13338e+06	26415.7	27685.4	49803.9	122068	165985	949924	316479	1.92916e+06	47946.5	44923.2	404254	358809	229148	583710	1.37231e+06	20406.3	10714.6	3625.91	1.22365e+06	432503	504132	151915	571270	4.70572e+06	68253.8	3.97969e+06	1.00596e+06	3.3532e+07	1.17805e+06	84990.5	126910	185911	5.28361e+06	473251	4.25187e+06	104905	10316.5
LP02_gV	gV	LP02	2.0316e+06	277926	451065	385034	1.09387e+06	36223	83535.4	81887	91026	2.33132e+06	7378.26	96927.8	49803.9	309543	413187	148278	876733	1.84621e+06	75211	48870	117151	343731	37088.4	627998	516620	20114.1	4606.5	2743.42	1.17805e+06	844330	336028	122068	1.13338e+06	3834200	42163.5	2.85404e+06	979210	2.39813e+07	1.92916e+06	110030	140751	242742	3.61697e+06	696959	3.97969e+06	745189	52371.3
LP03_gA	gA	LP03	800808	89103.4	265289	544988	1.06203e+06	76883.9	218445	42163.5	45958.9	876733	27685.4	9504.01	52371.3	78264.8	151915	696959	194874	2.96176e+06	44923.2	57285.2	484181	763685	84990.5	289777	1.37231e+06	7378.26	13115.1	3379.3	949924	1.41811e+06	235653	122068	681694	5.07597e+06	104905	3834200	1.13338e+06	1.22832e+07	862363	113792	132499	206999	4.11681e+06	260010	5.28361e+06	583710	72073.6
LP03_pV	pV	LP03	1.17805e+06	113792	272862	377399	1.03297e+06	124807	289777	61193	51195.8	949924	27042.8	16570.1	54519.7	68253.8	165985	493632	206999	1.84621e+06	47946.5	49803.9	367137	899323	148278	651302	1.6386e+06	8999.3	15060.6	5539.16	1.09387e+06	1.13338e+06	247960	140751	780843	5.28361e+06	110030	3.61697e+06	1.2708e+06	1.78466e+07	1.00596e+06	83535.4	120032	162356	4.70572e+06	277926	4.55893e+06	137475	5392.76
LP03_gV	gV	LP03	899323	143155	283792	367137	1.06203e+06	40598.5	235653	52371.3	33168	876733	18631.2	11454.2	46936.7	75211	148278	423774	229148	2236725	42163.5	68253.8	451065	800808	93142.6	394501	1.2708e+06	7010.83	12339.3	5125.66	862363	1.41811e+06	265289	134805	638968	5.47164e+06	112053	3834200	1.17805e+06	1.05039e+07	1.13338e+06	110030	120032	203259	4.11681e+06	296010	5.07597e+06	745189	65059.3
LP04_gA	gA	LP04	1.13338e+06	162356	329137	462368	598542	394501	247960	6322.51	60025.5	155202	28127.8	9504.01	30557.9	102459	151915	638968	223650	583710	37902	44145.3	528931	1.03297e+06	55910.9	83535.4	1.3241e+06	10714.6	17163.6	3516.06	696959	862363	423774	134805	899323	5.47164e+06	100678	3.97969e+06	1.00596e+06	3.93201e+07	559764	176523	98915.3	253316	6166550	516620	4.40813e+06	126910	46936.7
LP04_pV	pV	LP04	979210	140751	253316	423774	726894	329137	277926	12595.3	51195.8	120032	43220.7	6660.27	36223	80300.7	137475	583710	206999	3834200	47946.5	23682	613933	822361	62345.6	69379.9	1.22365e+06	7179.48	9696.26	5125.66	1.13338e+06	899323	528931	162356	1.37231e+06	4.40813e+06	148278	3.61697e+06	1.09387e+06	4.36427e+07	627998	194874	124807	322158	5.47164e+06	571270	4.11681e+06	48870	76883.9
LP05_gA	gA	LP05	696959	96927.8	272862	423774	876733	49803.9	198672	60025.5	44923.2	122068	31202.6	4159.09	44145.3	223650	93142.6	301467	206999	2.58208e+06	70636.7	18631.2	441968	283792	113792	108038	1.06203e+06	5998.41	10526.1	3901.64	1.09387e+06	1.6386e+06	385034	143155	1.03297e+06	4.55893e+06	27042.8	4.40813e+06	1.13338e+06	3.64928e+07	899323	155202	151915	148278	5.28361e+06	322158	4.25187e+06	1.92916e+06	367137
LP05_pV	pV	LP05	921444	235653	493632	462368	862363	75211	242742	60025.5	58705.1	191076	43220.7	31899	34669.5	129336	143155	763685	94993.8	2.58208e+06	80300.7	26415.7	377399	309543	159186	176523	1.22365e+06	13383.2	17163.6	9504.01	1.2708e+06	1.3241e+06	451065	151915	1.13338e+06	5.28361e+06	86912.6	3.97969e+06	1.03297e+06	5.60324e+07	949924	185911	194874	169710	5.80189e+06	322158	4.25187e+06	83535.4	15587
LP05_gV	gV	LP05	822361	194874	289777	223650	780843	54519.7	272862	47946.5	46936.7	185911	33811.5	15060.6	38864	83535.4	198672	949924	89103.4	3.06076e+06	63703.3	18211.2	343731	316479	132499	155202	1.3241e+06	7713.26	9224.34	5539.16	1.13338e+06	1.5162e+06	385034	120032	1.22365e+06	5.28361e+06	52371.3	4.11681e+06	1.06203e+06	4.36427e+07	844330	159186	145796	143155	5.47164e+06	309543	3.97969e+06	979210	260010
LP06_gA	gA	LP06	763685	329137	322158	516620	862363	235653	413187	155202	70636.7	301467	38864	13691.5	33811.5	638968	180220	1.13338e+06	223650	2236725	100678	19001.5	377399	844330	102459	173062	1.5162e+06	6322.51	10930.8	3253.67	949924	2.15102e+06	277926	122068	1.2708e+06	4.70572e+06	69379.9	3834200	876733	29945625	681694	132499	159186	143155	4.86127e+06	309543	5.28361e+06	726894	140751
LP06_pV	pV	LP06	667171	394501	385034	272862	800808	350915	516620	117151	65059.3	277926	31899	34669.5	37088.4	726894	185911	1.06203e+06	159186	3.50889e+06	98915.3	17163.6	451065	899323	104905	191076	1.69769e+06	5392.76	15885.7	4317.9	1.00596e+06	1776350	322158	148278	1.22365e+06	5.07597e+06	122068	3834200	862363	4.36427e+07	822361	132499	151915	173062	5.80189e+06	377399	4.70572e+06	143155	81887
LP06_gV	gV	LP06	651302	377399	296010	367137	844330	322158	638968	159186	70636.7	316479	25222.9	24654.2	52371.3	696959	134805	1.00596e+06	198672	3.50889e+06	98915.3	16570.1	473251	899323	100678	180220	1.6386e+06	6322.51	13115.1	4159.09	1.06203e+06	1.84621e+06	336028	137475	1.22365e+06	5.28361e+06	126910	3834200	876733	4.36427e+07	780843	129336	165985	169710	5.80189e+06	343731	4.70572e+06	309543	58705.1
LP07_gA	gA	LP07	979210	343731	62345.6	229148	876733	367137	34669.5	13950.7	19707.1	1.03297e+06	30557.9	13691.5	16201	83535.4	404254	253316	75211	1776350	53579.9	460.923	73626.5	260010	23682	78264.8	441968	10526.1	3516.06	2833.18	1.37231e+06	2.33132e+06	212895	140751	1.06203e+06	6166550	8774.7	3.73931e+06	1.09387e+06	3.3532e+07	2236725	185911	126910	198672	4.25187e+06	394501	8.89559e+06	1.6386e+06	176523
LP07_pV	pV	LP07	441968	296010	169710	253316	583710	493632	104905	31202.6	36223	140751	37088.4	14511.5	38864	57285.2	96927.8	1.13338e+06	358809	3.15348e+06	43220.7	20834.2	316479	180220	75211	108038	949924	6499.97	13691.5	3253.67	1.6386e+06	1.5162e+06	242742	151915	1.09387e+06	4.70572e+06	66382.4	3.97969e+06	979210	5.60324e+07	1.37231e+06	162356	132499	235653	4.86127e+06	413187	6166550	206999	110030
LP08_gA	gA	LP08	441968	122068	162356	423774	1.17805e+06	247960	432503	24654.2	61193	126910	19707.1	3901.64	46936.7	151915	66382.4	94993.8	289777	3834200	51195.8	91026	404254	571270	96927.8	206999	681694	14807.9	18211.2	3379.3	1.03297e+06	1.22365e+06	667171	134805	1.00596e+06	4.40813e+06	100678	4.70572e+06	979210	29945625	822361	180220	169710	191076	5.07597e+06	763685	3.36421e+06	309543	60025.5
LP08_pV	pV	LP08	451065	113792	169710	598542	1.06203e+06	301467	404254	33811.5	58705.1	129336	20834.2	2210.46	28745.4	180220	60025.5	165985	336028	3.50889e+06	49803.9	54519.7	367137	627998	80300.7	260010	638968	9224.34	18631.2	2288.29	1.17805e+06	1.22365e+06	493632	122068	1.2708e+06	3.97969e+06	96927.8	4.70572e+06	979210	3.3532e+07	862363	159186	137475	173062	5.28361e+06	745189	3.06076e+06	140751	86912.6
LP08_gV	gV	LP08	367137	30046	113792	504132	979210	296010	385034	16815.5	60025.5	122068	24654.2	4606.5	17870.7	198672	69379.9	100678	253316	2.96176e+06	52371.3	51195.8	358809	780843	80300.7	173062	627998	13691.5	12128.7	2915.88	921444	1.3241e+06	711897	129336	1.09387e+06	4.11681e+06	61193	4.70572e+06	1.03297e+06	2.17423e+07	822361	159186	148278	145796	5.07597e+06	571270	3.25244e+06	844330	162356
LP09_pV	pV	LP09	1.03297e+06	159186	309543	1.3241e+06	696959	358809	277926	86912.6	63703.3	780843	75211	16815.5	60025.5	377399	265289	218445	432503	31899	129336	7179.48	638968	229148	272862	91026	1.2708e+06	25831.8	13115.1	15885.7	1.13338e+06	2236725	385034	84990.5	921444	7.22541e+06	65059.3	4.25187e+06	763685	3.50889e+06	1.92916e+06	83535.4	117151	151915	6.89816e+06	613933	3834200	253316	102459
LP09_gV	gV	LP09	876733	212895	385034	1.37231e+06	583710	229148	296010	89103.4	61193	1.22365e+06	104905	10115.7	68253.8	394501	253316	218445	358809	25831.8	162356	13383.2	613933	667171	283792	93142.6	1.00596e+06	13115.1	7713.26	13950.7	800808	2236725	309543	76883.9	681694	6166550	84990.5	4.86127e+06	745189	3.06076e+06	1.84621e+06	96927.8	65059.3	134805	6.89816e+06	516620	4.55893e+06	1.13338e+06	180220
LP10_gA	gA	LP10	413187	91026	301467	358809	1.5162e+06	93142.6	253316	108038	52371.3	137475	57285.2	25831.8	31202.6	89103.4	30046	12128.7	28127.8	3.15348e+06	94993.8	96927.8	583710	571270	40598.5	289777	1.06203e+06	7713.26	12339.3	1357.87	1.41811e+06	711897	544988	185911	1.46353e+06	4.70572e+06	33811.5	3.61697e+06	1.00596e+06	3.64928e+07	1.57114e+06	112053	212895	176523	4.86127e+06	745189	5.47164e+06	1.22365e+06	117151
LP10_pV	pV	LP10	377399	19376	493632	336028	1.09387e+06	94993.8	277926	86912.6	45958.9	283792	53579.9	15587	48870	212895	26415.7	32384.6	358809	2.96176e+06	63703.3	49803.9	571270	423774	27042.8	247960	1.37231e+06	7378.26	11896.1	1811.45	1.5162e+06	844330	613933	169710	1.57114e+06	4.70572e+06	112053	3834200	1.06203e+06	3.93201e+07	1.46353e+06	96927.8	194874	159186	4.40813e+06	876733	5.47164e+06	102459	100678
LP10_gV	gV	LP10	571270	21775.3	473251	322158	1.13338e+06	134805	343731	98915.3	39845.1	132499	58705.1	26415.7	112053	129336	91026	89103.4	394501	2.67906e+06	96927.8	68253.8	462368	493632	60025.5	272862	1.17805e+06	11695	14192	3516.06	1.2708e+06	899323	583710	194874	1.46353e+06	4.70572e+06	110030	3834200	979210	3.93201e+07	1.5162e+06	143155	229148	206999	3.97969e+06	949924	5.47164e+06	176523	120032
LP11_gA	gA	LP11	462368	329137	260010	493632	1.13338e+06	134805	350915	45958.9	40598.5	283792	37088.4	5003.22	36223	343731	48870	242742	223650	2.77543e+06	42163.5	33811.5	473251	921444	55910.9	309543	780843	12595.3	11172	2210.46	1.22365e+06	1.41811e+06	367137	112053	1.46353e+06	4.11681e+06	27042.8	4.86127e+06	800808	2.03308e+07	1.03297e+06	155202	173062	89103.4	5.07597e+06	899323	3.50889e+06	613933	145796
LP11_pV	pV	LP11	329137	191076	336028	544988	1.22365e+06	260010	301467	68253.8	34669.5	272862	27042.8	22721.2	30557.9	696959	76883.9	39845.1	235653	2.15102e+06	41435.9	51195.8	667171	800808	21775.3	432503	899323	10526.1	15885.7	5539.16	1.37231e+06	1.57114e+06	504132	148278	1.6386e+06	3.36421e+06	100678	3.97969e+06	921444	3.3532e+07	1.09387e+06	124807	212895	108038	4.86127e+06	876733	2.96176e+06	110030	32384.6
LP11_gV	gV	LP11	876733	504132	451065	583710	1776350	194874	159186	69379.9	16815.5	1.41811e+06	19001.5	65059.3	25831.8	350915	253316	72073.6	598542	2236725	78264.8	30557.9	62345.6	385034	20114.1	432503	117151	13950.7	6322.51	3379.3	1.22365e+06	1.92916e+06	413187	126910	1.84621e+06	3.25244e+06	44923.2	3.36421e+06	899323	1.61284e+07	921444	140751	165985	137475	2.67906e+06	763685	2.85404e+06	1.3241e+06	104905
LP12_gA	gA	LP12	385034	29370.9	191076	218445	544988	62345.6	91026	70636.7	17870.7	137475	11454.2	13115.1	45958.9	44923.2	69379.9	83535.4	277926	3.15348e+06	57285.2	24654.2	493632	260010	30557.9	61193	473251	9504.01	15885.7	3132.37	1.57114e+06	528931	309543	151915	1.03297e+06	5.47164e+06	173062	4.40813e+06	1.17805e+06	5.60324e+07	2.5061e+06	176523	242742	145796	4.55893e+06	504132	7.22541e+06	316479	104905
LP12_pV	pV	LP12	423774	32384.6	169710	289777	528931	54519.7	223650	96927.8	14192	42163.5	19376	14511.5	23156.6	37902	53579.9	31899	296010	3.06076e+06	63703.3	19707.1	559764	242742	35407.9	86912.6	493632	10316.5	11896.1	6499.97	1776350	516620	336028	151915	1.06203e+06	6.57697e+06	191076	5.28361e+06	1.22365e+06	5.60324e+07	2.67906e+06	143155	277926	194874	5.80189e+06	473251	7.22541e+06	108038	84990.5
LP12_gV	gV	LP12	377399	24161.2	194874	206999	598542	28127.8	83535.4	68253.8	19707.1	43220.7	21340.1	14511.5	37088.4	30046	61193	10930.8	322158	2.85404e+06	65059.3	29370.9	451065	162356	30557.9	78264.8	441968	10526.1	13691.5	8512.76	1.69769e+06	528931	301467	140751	1.06203e+06	6166550	145796	4.70572e+06	1.17805e+06	5.60324e+07	2.5061e+06	173062	242742	165985	5.07597e+06	462368	8.34226e+06	493632	155202
LP13_gA	gA	LP13	350915	54519.7	235653	242742	1.6386e+06	122068	93142.6	94993.8	60025.5	681694	8774.7	15885.7	31899	198672	55910.9	151915	367137	2.77543e+06	96927.8	117151	571270	651302	37902	63703.3	559764	16815.5	16570.1	1138.08	921444	876733	451065	102459	899323	4.55893e+06	110030	3.50889e+06	1.13338e+06	4.81019e+07	1.41811e+06	185911	140751	145796	4.86127e+06	1.00596e+06	7.22541e+06	1.37231e+06	173062
LP13_gV	gV	LP13	413187	148278	235653	309543	1.6386e+06	96927.8	63703.3	102459	10930.8	1.00596e+06	31899	31202.6	38864	559764	265289	110030	329137	2.96176e+06	124807	55910.9	283792	394501	7378.26	44145.3	528931	10526.1	8304	1609.45	1.13338e+06	1.3241e+06	598542	108038	1.69769e+06	4.70572e+06	159186	2.77543e+06	1.17805e+06	4.36427e+07	1.37231e+06	191076	176523	185911	3.73931e+06	921444	6.57697e+06	667171	33811.5
LP14_gA	gA	LP14	544988	30046	260010	343731	1.2708e+06	94993.8	377399	81887	37088.4	1.06203e+06	42163.5	2038.47	37902	137475	112053	49803.9	253316	2.33132e+06	80300.7	24161.2	432503	696959	124807	528931	1.3241e+06	13115.1	9504.01	4317.9	921444	1.6386e+06	336028	143155	1.09387e+06	4.86127e+06	78264.8	4.55893e+06	844330	3.64928e+07	949924	155202	145796	191076	5.07597e+06	711897	4.70572e+06	583710	132499
LP14_pV	pV	LP14	638968	53579.9	265289	844330	1.41811e+06	58705.1	176523	84990.5	44923.2	1.03297e+06	24161.2	2915.88	55910.9	316479	98915.3	377399	260010	2.85404e+06	65059.3	28127.8	473251	613933	110030	598542	1.46353e+06	14511.5	17527.4	9224.34	1.06203e+06	1.13338e+06	385034	134805	1.17805e+06	5.80189e+06	100678	4.25187e+06	921444	3.93201e+07	1.00596e+06	129336	137475	206999	5.28361e+06	726894	4.40813e+06	126910	28745.4
LP14_gV	gV	LP14	516620	27042.8	235653	350915	1.09387e+06	62345.6	212895	84990.5	34669.5	1.17805e+06	27685.4	3772.33	35407.9	242742	124807	129336	247960	2.85404e+06	58705.1	24654.2	528931	571270	100678	667171	1.57114e+06	13115.1	13383.2	4013.7	876733	1.46353e+06	385034	126910	1.2708e+06	5.07597e+06	113792	4.40813e+06	1.03297e+06	3.64928e+07	1.06203e+06	112053	132499	198672	4.86127e+06	681694	4.55893e+06	432503	78264.8
LP15_gA	gA	LP15	822361	113792	247960	1.00596e+06	423774	61193	108038	242742	14807.9	1.22365e+06	81887	15885.7	68253.8	277926	159186	272862	394501	20406.3	66382.4	18631.2	336028	800808	283792	104905	638968	28745.4	5003.22	5392.76	1.6386e+06	949924	377399	60025.5	1.17805e+06	4.55893e+06	52371.3	5.07597e+06	763685	3.93201e+07	2.0316e+06	229148	129336	194874	5.80189e+06	745189	4.70572e+06	504132	80300.7
LP15_gV	gV	LP15	800808	112053	272862	844330	462368	66382.4	98915.3	343731	20114.1	1.00596e+06	72073.6	13383.2	22189.3	283792	145796	229148	336028	45958.9	62345.6	19001.5	322158	780843	180220	80300.7	651302	30046	11172	8512.76	1.6386e+06	979210	423774	60025.5	1.09387e+06	4.70572e+06	57285.2	4.55893e+06	711897	3.93201e+07	2.0316e+06	206999	140751	223650	5.47164e+06	726894	4.86127e+06	745189	155202
LP16_gA	gA	LP16	627998	134805	358809	763685	844330	33811.5	108038	176523	51195.8	1.69769e+06	18211.2	13950.7	47946.5	91026	350915	58705.1	235653	745189	113792	30557.9	48870	212895	49803.9	289777	316479	11454.2	5707.48	6176.58	711897	1.6386e+06	253316	80300.7	949924	5.80189e+06	40598.5	3.15348e+06	1.2708e+06	5.60324e+07	1.3241e+06	120032	148278	63703.3	4.40813e+06	638968	6.57697e+06	385034	24161.2
LP16_pV	pV	LP16	651302	124807	39845.1	367137	544988	104905	80300.7	206999	33811.5	1.22365e+06	41435.9	20114.1	19376	117151	63703.3	203259	316479	25831.8	52371.3	31899	462368	336028	120032	385034	1.84621e+06	18211.2	8999.3	5864.92	921444	949924	394501	84990.5	559764	6.89816e+06	98915.3	4.25187e+06	844330	5.60324e+07	1.00596e+06	165985	108038	132499	5.47164e+06	473251	5.28361e+06	46936.7	13383.2
LP16_gV	gV	LP16	763685	91026	218445	265289	504132	69379.9	83535.4	113792	43220.7	844330	34669.5	12339.3	24654.2	191076	98915.3	253316	289777	32384.6	61193	51195.8	343731	260010	122068	322158	1.41811e+06	12595.3	10316.5	6176.58	667171	1.22365e+06	277926	96927.8	528931	6.57697e+06	54519.7	3.97969e+06	1.00596e+06	5.60324e+07	876733	180220	100678	73626.5	4.70572e+06	432503	5.07597e+06	484181	112053
LP17_pV	pV	LP17	651302	98915.3	451065	198672	613933	159186	165985	169710	62345.6	1.06203e+06	55910.9	11896.1	27042.8	91026	60025.5	493632	516620	70636.7	43220.7	20834.2	667171	763685	143155	329137	1.69769e+06	9504.01	13115.1	4013.7	921444	1.46353e+06	191076	129336	1.00596e+06	4.86127e+06	102459	3834200	979210	2.68924e+07	385034	93142.6	140751	100678	5.47164e+06	350915	5.07597e+06	84990.5	16815.5
LP17_gV	gV	LP17	822361	89103.4	322158	296010	493632	173062	151915	148278	66382.4	1.37231e+06	60025.5	31899	30557.9	84990.5	65059.3	638968	289777	1.6386e+06	44145.3	24654.2	473251	613933	124807	242742	1.69769e+06	8156.84	15885.7	3772.33	780843	1.5162e+06	176523	122068	921444	4.70572e+06	91026	4.40813e+06	1.06203e+06	2.39813e+07	367137	110030	137475	155202	5.47164e+06	301467	5.07597e+06	272862	49803.9
LP18_gA	gA	LP18	876733	229148	638968	343731	404254	289777	134805	91026	53579.9	1.41811e+06	37902	20114.1	40598.5	155202	94993.8	613933	272862	42163.5	38864	39845.1	441968	336028	68253.8	2.0316e+06	780843	6322.51	11695	3625.91	844330	1.37231e+06	413187	124807	451065	4.70572e+06	83535.4	3.36421e+06	822361	1.78466e+07	1.46353e+06	110030	96927.8	277926	5.28361e+06	493632	5.47164e+06	899323	242742
LP18_pV	pV	LP18	1.00596e+06	218445	667171	322158	432503	316479	122068	86912.6	53579.9	763685	47946.5	5539.16	49803.9	143155	63703.3	862363	385034	1.41811e+06	44145.3	40598.5	377399	350915	159186	1.57114e+06	1.15571e+06	5864.92	16815.5	6499.97	1.15571e+06	949924	473251	113792	638968	4.25187e+06	98915.3	3.15348e+06	790825	29945625	1.5162e+06	96927.8	102459	247960	5.28361e+06	571270	5.07597e+06	198672	29370.9
LP18_gV	gV	LP18	613933	223650	451065	212895	544988	198672	86912.6	76883.9	93142.6	979210	43220.7	4735.82	41435.9	253316	165985	203259	350915	31202.6	57285.2	35407.9	627998	385034	159186	2.0316e+06	1.00596e+06	8304	14511.5	7554.52	862363	1.2708e+06	329137	89103.4	745189	4.40813e+06	94993.8	2.85404e+06	822361	29945625	1.41811e+06	117151	84990.5	289777	4.70572e+06	726894	5.47164e+06	296010	102459
LP19_gA	gA	LP19	322158	51195.8	80300.7	8304	583710	53579.9	102459	134805	38864	528931	33168	26415.7	14807.9	394501	140751	31202.6	223650	5864.92	52371.3	21775.3	651302	212895	96927.8	301467	711897	33811.5	27685.4	7936.29	1.17805e+06	1.06203e+06	404254	110030	726894	4.11681e+06	81887	5.80189e+06	1.6386e+06	5.60324e+07	1.22365e+06	242742	120032	93142.6	6.57697e+06	413187	4.55893e+06	272862	137475
LP19_gV	gV	LP19	358809	113792	108038	7554.52	462368	48870	96927.8	159186	46936.7	265289	54519.7	35407.9	13950.7	235653	94993.8	343731	185911	7179.48	43220.7	23682	423774	336028	61193	194874	711897	33811.5	21775.3	4606.5	1.46353e+06	1.13338e+06	451065	132499	1.00596e+06	4.86127e+06	66382.4	4.55893e+06	1.57114e+06	5.60324e+07	1.22365e+06	272862	120032	89103.4	6.57697e+06	385034	4.40813e+06	350915	126910
LP20_gA	gA	LP20	862363	32384.6	301467	473251	504132	212895	108038	143155	151915	763685	28127.8	8999.3	37088.4	206999	110030	223650	242742	1.3241e+06	37902	43220.7	780843	627998	62345.6	651302	1.37231e+06	10316.5	11896.1	8774.7	667171	844330	423774	120032	272862	5.07597e+06	72073.6	3834200	1.03297e+06	1.52232e+07	822361	129336	126910	98915.3	4.86127e+06	350915	4.70572e+06	100678	15060.6
LP20_pV	pV	LP20	528931	6499.97	272862	473251	484181	176523	91026	145796	169710	1.06203e+06	8304	10930.8	40598.5	151915	159186	100678	253316	25222.9	34669.5	18631.2	763685	571270	289777	949924	1.37231e+06	12595.3	17870.7	7554.52	899323	726894	385034	120032	301467	4.86127e+06	76883.9	4.25187e+06	1.17805e+06	1.52232e+07	745189	110030	104905	96927.8	5.47164e+06	462368	4.11681e+06	185911	112053
LP20_gV	gV	LP20	979210	44145.3	404254	726894	780843	126910	229148	206999	198672	1.84621e+06	20834.2	33811.5	17870.7	129336	583710	100678	316479	3253.67	80300.7	27685.4	140751	667171	66382.4	876733	504132	15306.8	10316.5	7936.29	681694	862363	194874	143155	462368	4.11681e+06	73626.5	3.36421e+06	1.06203e+06	1.05039e+07	921444	185911	173062	176523	3834200	394501	5.07597e+06	559764	63703.3
LP21_gA	gA	LP21	441968	516620	277926	350915	800808	165985	124807	229148	1549.18	1.3241e+06	8774.7	26415.7	20406.3	194874	504132	43220.7	247960	17870.7	69379.9	25831.8	316479	367137	27685.4	176523	583710	6660.27	1974.19	8156.84	1.00596e+06	1.92916e+06	451065	169710	2.33132e+06	3.73931e+06	45958.9	2.85404e+06	1.13338e+06	1.78466e+07	1.6386e+06	94993.8	151915	191076	4.86127e+06	423774	7.22541e+06	2.15102e+06	148278
LP21_pV	pV	LP21	432503	242742	343731	316479	638968	423774	194874	185911	55910.9	235653	24654.2	4477.12	13691.5	229148	117151	102459	322158	57285.2	34669.5	48870	862363	367137	65059.3	113792	1.22365e+06	18211.2	17163.6	4735.82	1.46353e+06	1.17805e+06	451065	159186	1.3241e+06	5.07597e+06	98915.3	3.97969e+06	1.09387e+06	29945625	1.6386e+06	126910	155202	148278	5.80189e+06	528931	6166550	198672	31202.6
LP21_gV	gV	LP21	493632	247960	272862	169710	559764	277926	151915	253316	47946.5	336028	27042.8	12595.3	12339.3	185911	112053	75211	301467	44923.2	35407.9	69379.9	696959	385034	14807.9	126910	413187	15306.8	10714.6	5864.92	1.17805e+06	1.46353e+06	451065	176523	1.2708e+06	5.47164e+06	26415.7	4.55893e+06	979210	1.78466e+07	1.5162e+06	117151	145796	143155	5.28361e+06	432503	6.89816e+06	1.41811e+06	296010
[truncated: 346 more columns]

## Sheet: Cohort 2
LFQ values of quantified proteins in Cohort 2
Normal vs. Tumor
Sample	Type	GATD3	UBA6	ESYT2	SHTN1	ILVBL	NBAS	WDR91	CNOT1	MAP1LC3B	RABGAP1L	NACA	AGPS	KIF2A	PDLIM1	ACOT7	MYO1C	SNAP23	AIP	GTPBP1	STXBP3	AP3B1	NDUFS8	PSMD11	PSMD12	PSMD9	ATOX1	PGRMC1	SUPT5H	DFFA	HIP1	CLIC1	EIF3F	PDHX	WASL	PDE2A	IPO5	DNM1L	GOLIM4	AGRN	EXOC5	BTN3A3	NDUFA4	PSMD14	BIN1	KPNA3	CHL1	VWA5A	SDCBP
N01	Normal	1891900	75337	668630	315000	229440	59359	24237	264940	764440	55474	788460	50256	296520	29209	1418500	167310	83098	162680	18554	96644	45547	1957500	310320	220670	253240	672350	261080	68762	107320	855240	79342	107360	1483800	403700	552790	538960	706640	18999	264180	702350	125230	969580	258670	2270800	295810	499240	38075	109030
N02	Normal	2264000	72695	524530	377740	223150	77746	24900	105810	828640	88193	624680	38144	308080	126400	1483000	294800	112140	249030	27429	116620	58404	1816800	338750	155280	367100	608200	884750	15997	120860	528900	73749	110170	1027300	532500	489920	620440	941040	29782	264110	786030	131360	2165100	155720	2148000	173970	449690	47818	227530
N03	Normal	1962500	137780	416000	634480	213270	59899	36575	345480	968810	73428	637420	56079	399830	3840.4	2226900	55270	93099	202240	53872	161860	51503	1307800	372530	238990	180330	916990	422890	33390	126850	1009700	134130	261750	1073100	347610	571380	741180	1266100	16488	164460	481510	57152	1444500	251470	2769300	173970	576430	25599	132760
T01	Tumor	904340	258350	315410	619400	329550	94245	93020	505800	865600	72764	848910	96526	254250	21540	738710	155620	275830	435650	41519	236830	115310	384880	330330	346510	462400	1451300	210780	128490	329200	2166200	1197700	319080	314530	245360	49414	759590	432400	144370	175140	437830	137680	122360	317610	2133600	205580	121740	209580	359060
T02	Tumor	961630	74622	156110	30006	214240	69036	55267	500780	568770	164760	698100	84036	110500	188870	233970	69875	165970	396000	173970	84308	131720	593200	428310	366810	366370	655000	1398800	211790	352450	1784300	341620	628800	95252	128520	4827.5	531540	242550	640630	1531300	503400	194180	93935	407630	334350	179290	15003	168220	588260
T03	Tumor	2285600	190060	313650	176390	378040	88256	160660	416040	486640	37157	736950	83223	384700	188990	187390	156260	474300	247770	57999	222580	268030	614760	354030	284480	359200	1541100	185470	94368	325380	881670	872970	336820	334160	437430	15781	812680	282690	375090	433380	371310	260120	231920	252610	481390	222890	1010700	24380	235730
T04	Tumor	1506100	164400	394470	427780	227360	49987	40027	252830	891430	53413	716190	109410	201920	149330	533900	56791	230320	274190	28227	146200	107840	275270	225930	233490	376980	909750	518710	73382	295570	1141500	348740	290680	425130	192410	64783	805200	407410	271020	220820	327640	62442	78432	192880	1268300	223720	300960	61179	23681
T05	Tumor	1319800	227130	699180	170080	421310	88031	102490	501620	459630	31959	1179700	113470	150330	352370	232590	381550	513220	248300	34760	227460	224370	448600	377360	287440	622340	1054000	916230	240580	486310	779880	1914100	388700	88898	305860	27343	674440	314910	261660	648150	340510	241370	146290	258320	571320	159400	352350	75774	317460
T06	Tumor	1773900	204670	314360	826030	303180	79655	67322	459990	1537000	57745	767870	156110	255640	70459	834880	64347	385940	244760	56571	230940	142810	634430	332150	256390	488410	809900	497120	60479	196320	2515900	801880	344630	440760	252900	66000	838290	527120	134840	279720	408930	165690	136670	206070	2796700	228070	283060	79411	138880
T07	Tumor	1826200	180960	265990	169700	219060	72493	110300	607440	465500	92752	1085400	123880	287670	32495	416830	132140	242000	321620	184020	251890	107490	501360	439610	315080	236810	1019800	702670	311850	268810	2323800	172420	556570	585450	135320	134670	865460	417830	365010	422780	439480	201510	60376	271340	576220	287160	262980	367380	311830
T08	Tumor	1813700	211000	305160	305210	368410	80610	87843	447180	1058600	74740	975120	114440	322890	11159	683520	58451	299970	274120	143490	163990	95871	592370	337440	317870	257410	1058800	279950	167370	180580	1989600	179920	371390	443490	327170	164780	980230	516750	168770	238380	451240	206210	129080	285000	1350500	235100	325400	119040	247360
T09	Tumor	966120	195930	555930	230630	195660	100710	69531	599030	697940	37190	1043700	135340	126550	273080	203940	382640	498330	292890	60720	151680	234030	572690	415310	368210	468940	584670	637770	294790	398900	1491600	1574000	552050	93835	171600	11131	699780	273560	336810	421260	551330	190570	151410	334160	563400	180010	154030	254350	335280
T10	Tumor	971180	220480	437450	55755	319430	160630	78404	732300	414640	36501	824130	140060	120810	113910	116870	50424	240770	367690	133410	174670	79537	358230	463950	353120	427430	373190	715980	497660	313390	1343700	738750	376660	90545	309730	21255	1155600	191060	490930	539110	566750	345050	72737	312460	393440	251860	19146	187340	180710
T11	Tumor	1368500	137030	343500	157780	201390	51901	48726	513190	1525600	44873	772270	63374	198960	17208	378050	35867	169320	317280	105200	295580	60779	423130	324860	252260	286340	988280	293060	238180	467590	1749100	127280	320470	267730	309730	5654	763380	184000	223580	140430	468360	126210	184620	173710	419510	175880	246330	183280	159570
T12	Tumor	1514900	205190	498570	398040	673580	137900	82004	641610	1107700	22169	1007300	162290	272130	77253	390700	304810	198000	254130	90355	235180	80912	513610	369030	352470	252060	609260	541840	268070	226030	3211400	1412300	298030	308960	291020	17805	628490	193430	234540	118330	365980	172020	144000	295540	537450	181880	297300	208680	412690
T13	Tumor	705800	212980	490890	221870	192600	133110	51040	508720	435270	61280	518000	84798	79130	562050	100490	233030	445280	183470	61935	151750	272550	413910	371290	415570	593130	319820	719300	61838	233170	1296100	1403900	324090	120600	210720	11507	832010	202020	466880	522390	285690	228500	476070	385140	162730	358470	140590	288870	228220
T14	Tumor	670030	221750	433380	181350	369100	122120	62691	935590	361520	33273	964080	105970	161720	208820	142690	120090	370770	303180	127360	188020	194660	366130	477730	378070	374090	339250	453950	455040	313580	2461600	1345800	509430	111510	479990	8730.3	612220	222650	392280	1534300	514720	58166	159390	324850	536380	170730	527550	89546	443980
T15	Tumor	559580	189760	227080	706950	305480	77417	57953	380490	830630	52740	640390	196730	112290	843350	477130	332270	466260	280660	57804	168480	209680	370620	386910	386660	466640	928210	538990	147920	172100	2888400	1667200	370220	97094	95629	6026.2	530220	269500	273720	740050	315740	103660	246350	340820	881950	233060	17606	129000	444850
T16	Tumor	800900	202780	315020	389000	220860	64975	112550	811630	496220	54482	1026500	122160	141500	52842	276470	205210	394790	355540	70696	153570	166530	359610	464820	379380	377440	1044300	397010	300290	263480	2478300	1355700	390060	132570	209560	19339	750360	277490	219230	278620	313970	265040	149620	345690	550520	313810	314900	58023	263340
T17	Tumor	1630500	83531	290320	199170	328010	142690	33260	327590	983290	67961	696080	74655	273700	12974	881890	69630	313190	238360	59708	200510	103720	753830	254390	235180	403430	1118200	498960	334480	426630	641760	65340	266720	497800	216520	291060	792270	509900	222690	102800	593780	205320	498180	279850	1389800	210140	105490	118300	143200
T18	Tumor	647510	291990	735260	492220	362800	50044	69706	566650	294750	100620	1177900	302010	117560	374820	349410	728550	498990	294150	48575	206890	253490	256630	448980	316860	436460	944240	602630	217350	264130	993100	3016700	708200	68033	205020	13997	600910	201320	286370	224630	334680	188510	81627	343570	465040	286630	45175	224550	325610
T19	Tumor	1539800	156950	310450	205640	246730	85238	17578	490070	660440	72892	889450	89950	132280	449880	550720	330700	364210	366920	40895	79600	168770	514160	429110	334010	505310	929280	781950	140700	260370	1729900	996130	351760	327770	118750	27675	807610	485000	377630	1425700	281020	159210	607350	349960	760220	263170	178040	151890	218850
T20	Tumor	1320400	239220	674790	129490	421670	124730	41443	606130	428910	145950	987860	128590	131400	209470	479940	336740	341120	374520	101720	110620	267180	516430	521410	443720	454320	703770	699390	322710	313140	1370800	1554600	481600	203480	196560	52231	777520	329000	350710	882330	347710	253340	104200	401100	219990	278130	45358	98557	298010
T21	Tumor	1207800	172360	440070	263880	249540	100290	94819	729930	533100	79096	748730	60406	231370	234360	507750	106400	189710	352700	70718	104830	190620	417070	504990	334560	207550	539750	504420	347010	137120	3952500	2014900	335770	209620	437410	127970	835020	342840	190470	129340	518550	103850	162840	375010	735960	186070	297690	155550	346680
T22	Tumor	1336200	180190	445480	520550	329280	82430	58945	459990	623360	95299	1182600	88354	233320	62503	1173900	159600	278760	366560	93216	119260	154140	689270	446190	305240	313510	1150000	573310	183710	201130	2177900	721290	376790	386390	229020	149450	685090	588840	193300	478860	487570	171020	228600	328370	1210800	240570	244190	229590	134330
T23	Tumor	1000800	234810	383710	377580	348460	147580	84705	698100	751230	40225	1346200	138860	147690	45372	430900	227580	343500	350010	173230	156760	180190	340150	521050	320020	398420	1167200	310120	362910	317930	2632700	1508800	431560	93915	221470	8703	772160	296540	288870	436190	455930	105870	102210	413500	514760	305950	296520	291340	188890
T24	Tumor	2356700	258710	221120	101470	372750	94701	60374	750030	675310	41359	1258900	188770	274050	19250	360340	73269	326370	258170	155440	333800	72973	378500	498560	369950	276320	1016200	575340	354580	511170	2079300	209950	359570	412040	359370	64530	883320	303830	385070	163790	658590	116810	255480	361150	394370	308590	27362	184250	207880
Peritumoral vs. Tumor
Sample	Type	GATD3	UBA6	ESYT2	SHTN1	ILVBL	NBAS	WDR91	CNOT1	MAP1LC3B	RABGAP1L	NACA	AGPS	KIF2A	PDLIM1	ACOT7	MYO1C	SNAP23	AIP	GTPBP1	STXBP3	AP3B1	NDUFS8	PSMD11	PSMD12	PSMD9	ATOX1	PGRMC1	SUPT5H	DFFA	HIP1	CLIC1	EIF3F	PDHX	WASL	PDE2A	IPO5	DNM1L	GOLIM4	AGRN	EXOC5	BTN3A3	NDUFA4	PSMD14	BIN1	KPNA3	CHL1	VWA5A	SDCBP
P01	Peritumoral	1339200	151180	439030	658470	269970	58288	47892	279390	818110	100480	863550	81481	361690	13015	1726600	63001	219090	223190	87705	169820	88231	1099000	367530	231870	203780	1018500	500250	72733	177510	1602700	198010	254370	688340	319240	487660	721840	1060500	11511	187410	448960	119730	797970	219270	3030900	205060	324910	43003	184920
P02	Peritumoral	1583600	97265	420690	389140	238740	69458	54528	497570	938060	118180	779050	85793	302550	36365	1116600	114650	137560	246280	38458	123830	71387	1128000	321120	223960	258370	840930	459810	121750	193340	1091400	197360	294410	760370	344370	284330	624790	796290	46991	316360	461730	165020	491400	222910	2177400	197810	478440	82196	175350
P03	Peritumoral	1763600	152910	374060	422270	239840	57243	51345	429980	846630	83429	922150	64983	279140	28173	1237100	107400	250650	259230	61646	185490	85611	964210	340850	283410	251030	745200	385850	109230	180450	1639900	695830	276420	609890	314450	351630	799880	762420	80890	162230	274400	324730	310810	226000	2042400	231420	370040	61410	156290
P04	Peritumoral	1809900	167310	333180	610350	269820	50108	41599	382710	876680	53974	873070	108210	238060	44292	1152100	43600	273680	263530	41944	183940	100580	868890	356130	292440	277840	828930	351770	85881	241490	2696500	646400	338340	487920	332310	158050	582810	545180	76084	249330	398820	188320	592090	270830	2224400	161470	247910	60634	143580
P05	Peritumoral	920260	256960	451510	770240	414260	122940	58221	476330	1244900	58559	975670	126440	257470	32687	774890	128760	369940	388380	95370	277300	135150	545660	360160	285170	373890	985980	229440	129690	203900	2878700	1577700	341670	275510	230540	24882	982110	417950	162760	294640	382360	180730	118330	269650	2049300	236260	338290	299030	220800
T01	Tumor	904340	258350	315410	619400	329550	94245	93020	505800	865600	72764	848910	96526	254250	21540	738710	155620	275830	435650	41519	236830	115310	384880	330330	346510	462400	1451300	210780	128490	329200	2166200	1197700	319080	314530	245360	49414	759590	432400	144370	175140	437830	137680	122360	317610	2133600	205580	121740	209580	359060
T02	Tumor	961630	74622	156110	30006	214240	69036	55267	500780	568770	164760	698100	84036	110500	188870	233970	69875	165970	396000	173970	84308	131720	593200	428310	366810	366370	655000	1398800	211790	352450	1784300	341620	628800	95252	128520	4827.5	531540	242550	640630	1531300	503400	194180	93935	407630	334350	179290	15003	168220	588260
T03	Tumor	2285600	190060	313650	176390	378040	88256	160660	416040	486640	37157	736950	83223	384700	188990	187390	156260	474300	247770	57999	222580	268030	614760	354030	284480	359200	1541100	185470	94368	325380	881670	872970	336820	334160	437430	15781	812680	282690	375090	433380	371310	260120	231920	252610	481390	222890	1010700	24380	235730
T04	Tumor	1506100	164400	394470	427780	227360	49987	40027	252830	891430	53413	716190	109410	201920	149330	533900	56791	230320	274190	28227	146200	107840	275270	225930	233490	376980	909750	518710	73382	295570	1141500	348740	290680	425130	192410	64783	805200	407410	271020	220820	327640	62442	78432	192880	1268300	223720	300960	61179	23681
T05	Tumor	1319800	227130	699180	170080	421310	88031	102490	501620	459630	31959	1179700	113470	150330	352370	232590	381550	513220	248300	34760	227460	224370	448600	377360	287440	622340	1054000	916230	240580	486310	779880	1914100	388700	88898	305860	27343	674440	314910	261660	648150	340510	241370	146290	258320	571320	159400	352350	75774	317460
T06	Tumor	1773900	204670	314360	826030	303180	79655	67322	459990	1537000	57745	767870	156110	255640	70459	834880	64347	385940	244760	56571	230940	142810	634430	332150	256390	488410	809900	497120	60479	196320	2515900	801880	344630	440760	252900	66000	838290	527120	134840	279720	408930	165690	136670	206070	2796700	228070	283060	79411	138880
T07	Tumor	1826200	180960	265990	169700	219060	72493	110300	607440	465500	92752	1085400	123880	287670	32495	416830	132140	242000	321620	184020	251890	107490	501360	439610	315080	236810	1019800	702670	311850	268810	2323800	172420	556570	585450	135320	134670	865460	417830	365010	422780	439480	201510	60376	271340	576220	287160	262980	367380	311830
T08	Tumor	1813700	211000	305160	305210	368410	80610	87843	447180	1058600	74740	975120	114440	322890	11159	683520	58451	299970	274120	143490	163990	95871	592370	337440	317870	257410	1058800	279950	167370	180580	1989600	179920	371390	443490	327170	164780	980230	516750	168770	238380	451240	206210	129080	285000	1350500	235100	325400	119040	247360
T09	Tumor	966120	195930	555930	230630	195660	100710	69531	599030	697940	37190	1043700	135340	126550	273080	203940	382640	498330	292890	60720	151680	234030	572690	415310	368210	468940	584670	637770	294790	398900	1491600	1574000	552050	93835	171600	11131	699780	273560	336810	421260	551330	190570	151410	334160	563400	180010	154030	254350	335280
T10	Tumor	971180	220480	437450	55755	319430	160630	78404	732300	414640	36501	824130	140060	120810	113910	116870	50424	240770	367690	133410	174670	79537	358230	463950	353120	427430	373190	715980	497660	313390	1343700	738750	376660	90545	309730	21255	1155600	191060	490930	539110	566750	345050	72737	312460	393440	251860	19146	187340	180710
T11	Tumor	1368500	137030	343500	157780	201390	51901	48726	513190	1525600	44873	772270	63374	198960	17208	378050	35867	169320	317280	105200	295580	60779	423130	324860	252260	286340	988280	293060	238180	467590	1749100	127280	320470	267730	309730	5654	763380	184000	223580	140430	468360	126210	184620	173710	419510	175880	246330	183280	159570
T12	Tumor	1514900	205190	498570	398040	673580	137900	82004	641610	1107700	22169	1007300	162290	272130	77253	390700	304810	198000	254130	90355	235180	80912	513610	369030	352470	252060	609260	541840	268070	226030	3211400	1412300	298030	308960	291020	17805	628490	193430	234540	118330	365980	172020	144000	295540	537450	181880	297300	208680	412690
T13	Tumor	705800	212980	490890	221870	192600	133110	51040	508720	435270	61280	518000	84798	79130	562050	100490	233030	445280	183470	61935	151750	272550	413910	371290	415570	593130	319820	719300	61838	233170	1296100	1403900	324090	120600	210720	11507	832010	202020	466880	522390	285690	228500	476070	385140	162730	358470	140590	288870	228220
T14	Tumor	670030	221750	433380	181350	369100	122120	62691	935590	361520	33273	964080	105970	161720	208820	142690	120090	370770	303180	127360	188020	194660	366130	477730	378070	374090	339250	453950	455040	313580	2461600	1345800	509430	111510	479990	8730.3	612220	222650	392280	1534300	514720	58166	159390	324850	536380	170730	527550	89546	443980
T15	Tumor	559580	189760	227080	706950	305480	77417	57953	380490	830630	52740	640390	196730	112290	843350	477130	332270	466260	280660	57804	168480	209680	370620	386910	386660	466640	928210	538990	147920	172100	2888400	1667200	370220	97094	95629	6026.2	530220	269500	273720	740050	315740	103660	246350	340820	881950	233060	17606	129000	444850
T16	Tumor	800900	202780	315020	389000	220860	64975	112550	811630	496220	54482	1026500	122160	141500	52842	276470	205210	394790	355540	70696	153570	166530	359610	464820	379380	377440	1044300	397010	300290	263480	2478300	1355700	390060	132570	209560	19339	750360	277490	219230	278620	313970	265040	149620	345690	550520	313810	314900	58023	263340
T17	Tumor	1630500	83531	290320	199170	328010	142690	33260	327590	983290	67961	696080	74655	273700	12974	881890	69630	313190	238360	59708	200510	103720	753830	254390	235180	403430	1118200	498960	334480	426630	641760	65340	266720	497800	216520	291060	792270	509900	222690	102800	593780	205320	498180	279850	1389800	210140	105490	118300	143200
T18	Tumor	647510	291990	735260	492220	362800	50044	69706	566650	294750	100620	1177900	302010	117560	374820	349410	728550	498990	294150	48575	206890	253490	256630	448980	316860	436460	944240	602630	217350	264130	993100	3016700	708200	68033	205020	13997	600910	201320	286370	224630	334680	188510	81627	343570	465040	286630	45175	224550	325610
T19	Tumor	1539800	156950	310450	205640	246730	85238	17578	490070	660440	72892	889450	89950	132280	449880	550720	330700	364210	366920	40895	79600	168770	514160	429110	334010	505310	929280	781950	140700	260370	1729900	996130	351760	327770	118750	27675	807610	485000	377630	1425700	281020	159210	607350	349960	760220	263170	178040	151890	218850
T20	Tumor	1320400	239220	674790	129490	421670	124730	41443	606130	428910	145950	987860	128590	131400	209470	479940	336740	341120	374520	101720	110620	267180	516430	521410	443720	454320	703770	699390	322710	313140	1370800	1554600	481600	203480	196560	52231	777520	329000	350710	882330	347710	253340	104200	401100	219990	278130	45358	98557	298010
T21	Tumor	1207800	172360	440070	263880	249540	100290	94819	729930	533100	79096	748730	60406	231370	234360	507750	106400	189710	352700	70718	104830	190620	417070	504990	334560	207550	539750	504420	347010	137120	3952500	2014900	335770	209620	437410	127970	835020	342840	190470	129340	518550	103850	162840	375010	735960	186070	297690	155550	346680
T22	Tumor	1336200	180190	445480	520550	329280	82430	58945	459990	623360	95299	1182600	88354	233320	62503	1173900	159600	278760	366560	93216	119260	154140	689270	446190	305240	313510	1150000	573310	183710	201130	2177900	721290	376790	386390	229020	149450	685090	588840	193300	478860	487570	171020	228600	328370	1210800	240570	244190	229590	134330
T23	Tumor	1000800	234810	383710	377580	348460	147580	84705	698100	751230	40225	1346200	138860	147690	45372	430900	227580	343500	350010	173230	156760	180190	340150	521050	320020	398420	1167200	310120	362910	317930	2632700	1508800	431560	93915	221470	8703	772160	296540	288870	436190	455930	105870	102210	413500	514760	305950	296520	291340	188890
T24	Tumor	2356700	258710	221120	101470	372750	94701	60374	750030	675310	41359	1258900	188770	274050	19250	360340	73269	326370	258170	155440	333800	72973	378500	498560	369950	276320	1016200	575340	354580	511170	2079300	209950	359570	412040	359370	64530	883320	303830	385070	163790	658590	116810	255480	361150	394370	308590	27362	184250	207880
Normal vs. Peritumoral
Sample	Type	GATD3	UBA6	ESYT2	SHTN1	ILVBL	NBAS	WDR91	CNOT1	MAP1LC3B	RABGAP1L	NACA	AGPS	KIF2A	PDLIM1	ACOT7	MYO1C	SNAP23	AIP	GTPBP1	STXBP3	AP3B1	NDUFS8	PSMD11	PSMD12	PSMD9	ATOX1	PGRMC1	SUPT5H	DFFA	HIP1	CLIC1	EIF3F	PDHX	WASL	PDE2A	IPO5	DNM1L	GOLIM4	AGRN	EXOC5	BTN3A3	NDUFA4	PSMD14	BIN1	KPNA3	CHL1	VWA5A	SDCBP
N01	Normal	1891900	75337	668630	315000	229440	59359	24237	264940	764440	55474	788460	50256	296520	29209	1418500	167310	83098	162680	18554	96644	45547	1957500	310320	220670	253240	672350	261080	68762	107320	855240	79342	107360	1483800	403700	552790	538960	706640	18999	264180	702350	125230	969580	258670	2270800	295810	499240	38075	109030
N02	Normal	2264000	72695	524530	377740	223150	77746	24900	105810	828640	88193	624680	38144	308080	126400	1483000	294800	112140	249030	27429	116620	58404	1816800	338750	155280	367100	608200	884750	15997	120860	528900	73749	110170	1027300	532500	489920	620440	941040	29782	264110	786030	131360	2165100	155720	2148000	173970	449690	47818	227530
N03	Normal	1962500	137780	416000	634480	213270	59899	36575	345480	968810	73428	637420	56079	399830	3840.4	2226900	55270	93099	202240	53872	161860	51503	1307800	372530	238990	180330	916990	422890	33390	126850	1009700	134130	261750	1073100	347610	571380	741180	1266100	16488	164460	481510	57152	1444500	251470	2769300	173970	576430	25599	132760
P01	Peritumoral	1339200	151180	439030	658470	269970	58288	47892	279390	818110	100480	863550	81481	361690	13015	1726600	63001	219090	223190	87705	169820	88231	1099000	367530	231870	203780	1018500	500250	72733	177510	1602700	198010	254370	688340	319240	487660	721840	1060500	11511	187410	448960	119730	797970	219270	3030900	205060	324910	43003	184920
P02	Peritumoral	1583600	97265	420690	389140	238740	69458	54528	497570	938060	118180	779050	85793	302550	36365	1116600	114650	137560	246280	38458	123830	71387	1128000	321120	223960	258370	840930	459810	121750	193340	1091400	197360	294410	760370	344370	284330	624790	796290	46991	316360	461730	165020	491400	222910	2177400	197810	478440	82196	175350
P03	Peritumoral	1763600	152910	374060	422270	239840	57243	51345	429980	846630	83429	922150	64983	279140	28173	1237100	107400	250650	259230	61646	185490	85611	964210	340850	283410	251030	745200	385850	109230	180450	1639900	695830	276420	609890	314450	351630	799880	762420	80890	162230	274400	324730	310810	226000	2042400	231420	370040	61410	156290
P04	Peritumoral	1809900	167310	333180	610350	269820	50108	41599	382710	876680	53974	873070	108210	238060	44292	1152100	43600	273680	263530	41944	183940	100580	868890	356130	292440	277840	828930	351770	85881	241490	2696500	646400	338340	487920	332310	158050	582810	545180	76084	249330	398820	188320	592090	270830	2224400	161470	247910	60634	143580
P05	Peritumoral	920260	256960	451510	770240	414260	122940	58221	476330	1244900	58559	975670	126440	257470	32687	774890	128760	369940	388380	95370	277300	135150	545660	360160	285170	373890	985980	229440	129690	203900	2878700	1577700	341670	275510	230540	24882	982110	417950	162760	294640	382360	180730	118330	269650	2049300	236260	338290	299030	220800
[truncated: 4,417 more columns]

## Sheet: Cohort 3
Normalized iBAQ values of 337 quantified proteins in Cohort 3
Sample	Type	IGLV4-69	IGLV8-61	IGLV10-54	IGLV7-46	IGLV2-18	IGLV3-10	IGLV3-9	IGKV2-28	IGHV3-64	IGHV4-4	IGLV5-45	IGHV3-49	IGKV6D-21	IGKJ1	IGHV6-1	IGHV3-15	IGHV3-21	IGHV2-26	IGHV3-73	IGHV3-74	IGHV3-43	IGLV9-49	IGHV3-72	IGHV1-69D	IGKV3D-20	IGHV1-3	IGHV1-18	IGHV1-24	IGHV4-28	IGHV3-35	IGHV3-38	IGHV5-51	IGKV1-8	IGKV2-24	PI16	IGLC7	IGKV2-29	CRTAC1	FILA2	HORN	MASP2	QSOX1	CHL1	APOL1	CD5L	KIF5C	FCGR3B	FCN3
F01	Control	162333	200539	1.41588e+06	128495	113410	1.0292e+06	18042	341226	67353.9	99591.6	151674	91778.8	93809.9	219409	137388	334201	11609.5	31033.5	4233.2	53896.8	32648.6	297815	87817.2	9127.75	25920.4	192155	184175	12499.9	47925.9	104070	6541.2	144022	125825	278295	170061	728978	589164	1277.11	2719.01	27372.1	9350.26	11931.1	5100.95	617971	859884	58800	57393.7	272134
F02	Control	442327	106.811	2.38561e+06	18537.8	128495	1.53089e+06	374108	1.0292e+06	27372.1	95521.7	365518	49854.1	184175	197286	54950.4	38385.1	26628.8	30393.3	1353.41	48897.5	16097.2	420360	174645	28015.4	20865.9	65625.4	215537	1648.99	76967.9	91778.8	106.811	123688	125825	312846	104070	319870	534902	3448.38	631.279	8498.51	13542.2	22160.3	2354.8	617971	887847	101758	39142.3	265634
F03	Control	227985	83937.6	1.11432e+06	134698	82309.5	1.06803e+06	35962.4	341226	33502	101758	159003	52999.1	104070	498368	67353.9	17520.6	10997.8	28015.4	36.5771	43462.2	34281.6	19628.8	69054.8	11609.5	31858.7	166227	184175	8274.14	25920.4	56260.6	1648.99	188789	137388	179438	128495	358377	394708	36.5771	5795.26	8498.51	12499.9	15601.5	2955.42	683998	617971	312846	27372.1	192155
F04	Control	170061	69054.8	887847	334201	166227	1.11432e+06	1.72864e+06	705913	12191.3	159003	83937.6	101758	58800	420360	272134	73614.7	28680.1	16976	6352.76	31858.7	40911.2	210455	120736	16521.4	113410	227985	265634	452448	27372.1	179438	18042	319870	140628	188789	631.279	483487	1.18295e+06	1907.29	783.39	8675.24	12499.9	11317.5	4640.85	442327	859884	60337.4	33502	174645
F05	Control	61680.1	12499.9	993996	462888	62980.4	859884	93809.9	617971	52999.1	87817.2	144022	101758	17520.6	404122	155499	33502	56260.6	9572.24	1907.29	21437.3	37585.1	47.744	272134	4233.2	47.744	197286	289973	787919	28680.1	118246	12861.5	411925	224529	278295	19628.8	297815	964609	47.744	2955.42	15116.9	4515.1	11609.5	2615.02	305768	1.0292e+06	31858.7	22684.5	249377
F06	Control	326084	137388	649882	5962.84	30393.3	1.37328e+06	13245.1	750998	149.86	89859.6	233545	104070	151674	197286	162333	5100.95	25311.2	14348.1	149.86	18042	11609.5	48897.5	210455	93809.9	36786	557587	227985	705913	38385.1	71967.3	7647.79	166227	111101	134698	60337.4	123688	927164	1832.63	2110.74	4078.04	7418.57	13542.2	2857.25	508577	1.0292e+06	32648.6	16097.2	319870
F07	Control	57393.7	2208.6	859884	348400	46110.3	278295	91778.8	420360	23980.5	149.86	93809.9	71967.3	33502	227985	64215.1	20865.9	31858.7	28015.4	9350.26	35962.4	19056.9	13542.2	87817.2	28680.1	50829.4	385093	159003	365518	10496.9	82309.5	14348.1	239372	192155	289973	47071.9	80151.6	705913	875.64	4369.64	11609.5	5633.71	15116.9	3721.59	557587	1.11432e+06	162333	26628.8	137388
F08	Control	244734	82309.5	520944	394708	197286	508577	830424	705913	10044.6	60337.4	179438	83937.6	118246	365518	326084	64215.1	24699.2	39142.3	3848.13	23980.5	40911.2	272134	215537	37585.1	140628	964609	239372	617971	25920.4	43462.2	11609.5	374108	184175	430411	31858.7	683998	1.53089e+06	875.64	707.627	955.583	10997.8	15116.9	2503.77	473340	1.37328e+06	57393.7	47925.9	249377
F09	Control	197286	5.10742	1.47293e+06	859884	137388	1.22672e+06	18042	728978	62980.4	82309.5	334201	113410	76967.9	483487	131740	179438	9572.24	53896.8	1043.15	46110.3	58800	174645	254846	6161.62	5.10742	341226	233545	404122	40082.3	125825	13542.2	259717	312846	140628	65625.4	111101	1.0292e+06	2955.42	128.103	5100.95	12499.9	11609.5	2857.25	573688	1.72864e+06	184175	42576.2	200539
F10	Control	278295	184175	52180.2	7418.57	147310	1.53089e+06	634215	545802	13976.7	47071.9	134698	65625.4	104070	319870	404122	159003	16976	50829.4	9127.75	24699.2	49854.1	188789	166227	38385.1	97285.3	374108	197286	272134	60337.4	78513.8	21437.3	249377	224529	289973	31858.7	87817.2	964609	1197.94	47.744	5461.09	16097.2	12499.9	5100.95	617971	1.11432e+06	219409	52999.1	305768
F11	Control	118246	58800	775673	750998	134698	1.84912e+06	6161.62	859884	40082.3	61680.1	188789	93809.9	179438	215537	442327	85922.4	7647.79	60337.4	1462.63	35962.4	120736	259717	32648.6	47925.9	28015.4	265634	200539	319870	41753.5	76967.9	2208.6	649882	170061	297815	115948	420360	1.22672e+06	2955.42	5.10742	171.618	6541.2	10300.7	3181.83	557587	1.14758e+06	75212.7	20865.9	278295
F12	Control	159003	9127.75	830424	1462.63	75212.7	1.14758e+06	33502	341226	30393.3	37585.1	289973	35116	118246	125825	91778.8	83937.6	5633.71	16097.2	5.10742	11609.5	34281.6	219409	85922.4	43462.2	46110.3	394708	192155	249377	18537.8	47071.9	2615.02	109183	254846	174645	41753.5	197286	617971	5.10742	5.10742	955.583	12499.9	10496.9	3448.38	508577	683998	137388	47925.9	244734
F13	Control	358377	334201	5795.26	887847	134698	2.10564e+06	67353.9	664784	47071.9	62980.4	254846	125825	36786	534902	215537	140628	43462.2	57393.7	4793.04	69054.8	76967.9	179438	137388	10781.7	70529.2	259717	197286	430411	25311.2	73614.7	22160.3	210455	170061	483487	82309.5	775673	1.98209e+06	5.10742	2503.77	3580.29	13245.1	10300.7	2208.6	589164	1.53089e+06	58800	54950.4	265634
F14	Control	80151.6	10044.6	374108	516.843	62980.4	1.0292e+06	20865.9	272134	4941.04	159003	15116.9	42576.2	170061	200539	197286	57393.7	12191.3	52180.2	6352.76	13976.7	27372.1	210455	8274.14	47071.9	43462.2	224529	259717	534902	37585.1	23252.4	1742.07	113410	233545	188789	28680.1	265634	927164	2857.25	171.618	5962.84	14753.2	11609.5	4793.04	750998	462888	76967.9	41753.5	394708
F15	Control	219409	64215.1	272134	1832.63	57393.7	800165	11931.1	312846	7872.36	40911.2	80151.6	61680.1	36786	224529	159003	155499	16976	41753.5	6352.76	16097.2	34281.6	249377	82309.5	7647.79	54950.4	227985	215537	602202	27372.1	46110.3	3951.97	140628	254846	365518	24699.2	118246	545802	4515.1	0.220152	3313.39	10044.6	14753.2	1907.29	473340	1.06803e+06	78513.8	17520.6	239372
F16	Control	200539	30393.3	649882	2110.74	210455	1.41588e+06	545802	285037	32648.6	2503.77	227985	101758	144022	312846	99591.6	91778.8	10496.9	69054.8	955.583	27372.1	47071.9	174645	64215.1	4078.04	89859.6	140628	239372	573688	29562.5	52180.2	8274.14	111101	134698	67353.9	82309.5	151674	800165	4369.64	128.103	1562.2	14348.1	9127.75	3448.38	887847	964609	71967.3	35962.4	224529
F17	Control	125825	78513.8	1.47293e+06	557587	111101	1.18295e+06	41753.5	249377	9127.75	49854.1	278295	57393.7	25920.4	233545	128495	197286	32648.6	21437.3	2.66378	31858.7	52180.2	151674	131740	16521.4	31033.5	184175	174645	728978	30393.3	70529.2	6541.2	348400	155499	534902	67353.9	545802	462888	2307.82	516.843	10781.7	9572.24	12191.3	3448.38	589164	1.22672e+06	192155	33502	227985
F18	Control	358377	97285.3	1.32084e+06	1.06803e+06	128495	2.31904e+06	166227	664784	31858.7	36786	170061	111101	65625.4	334201	50829.4	179438	15601.5	73614.7	1907.29	44439.3	48897.5	289973	210455	67353.9	57393.7	101758	227985	602202	33502	71967.3	8498.51	254846	272134	420360	188789	683998	617971	669.453	1648.99	5633.71	8897.02	9350.26	2503.77	545802	1.53089e+06	47071.9	35116	200539
F19	Control	70529.2	10044.6	498368	11317.5	76967.9	1.22672e+06	13976.7	705913	16976	37585.1	210455	341226	56260.6	278295	101758	39142.3	52180.2	31858.7	2.66378	22160.3	18537.8	312846	385093	49854.1	23252.4	192155	224529	534902	53896.8	104070	2955.42	215537	111101	545802	40911.2	374108	728978	2719.01	5100.95	8675.24	8498.51	19628.8	2007.85	750998	1.14758e+06	254846	41753.5	140628
F20	Control	159003	2.66378	800165	1113.49	131740	1.60103e+06	47071.9	374108	69054.8	17520.6	285037	70529.2	394708	297815	155499	27372.1	16976	28680.1	567.039	25311.2	41753.5	200539	137388	19628.8	144022	83937.6	227985	13245.1	42576.2	52180.2	13976.7	166227	151674	174645	93809.9	49854.1	859884	1277.11	1462.63	5962.84	3951.97	12861.5	2503.77	649882	1.53089e+06	73614.7	40911.2	170061
F21	Control	205199	5.10742	1.0292e+06	602202	118246	750998	54950.4	520944	82309.5	53896.8	244734	75212.7	93809.9	358377	61680.1	219409	11609.5	43462.2	7872.36	50829.4	26628.8	131740	137388	6761.15	159003	128495	192155	6161.62	21437.3	87817.2	8084.66	188789	144022	155499	123688	71967.3	683998	1197.94	955.583	12191.3	3848.13	13976.7	3067.31	483487	830424	65625.4	24699.2	101758
F22	Control	65625.4	144022	993996	7163.75	200539	1.22672e+06	1.37328e+06	239372	28015.4	1648.99	104070	82309.5	80151.6	233545	147310	111101	11609.5	35962.4	47.744	62980.4	22160.3	91778.8	89859.6	4793.04	125825	159003	188789	254846	46110.3	75212.7	12861.5	244734	151674	174645	70529.2	162333	365518	3951.97	1113.49	10300.7	16976	14753.2	2208.6	830424	859884	67353.9	28680.1	312846
F23	Control	166227	2.66378	1.18295e+06	545802	278295	927164	99591.6	239372	43462.2	41753.5	155499	85922.4	70529.2	197286	215537	137388	34281.6	8675.24	4078.04	28015.4	24699.2	89859.6	109183	17520.6	104070	297815	174645	48897.5	22160.3	64215.1	19056.9	159003	147310	227985	144022	131740	534902	1197.94	516.843	6352.76	4369.64	12499.9	1907.29	602202	1.47293e+06	57393.7	21437.3	151674
F24	Control	75212.7	54950.4	358377	125825	205199	927164	73614.7	265634	19056.9	20865.9	174645	47925.9	155499	348400	131740	49854.1	20280.5	47071.9	3580.29	34281.6	35116	297815	147310	29562.5	89859.6	319870	326084	12861.5	32648.6	71967.3	6941.72	289973	312846	137388	166227	750998	830424	1462.63	567.039	5277.34	4640.85	10997.8	2401.78	557587	1.47293e+06	61680.1	40911.2	109183
F25	Control	159003	76967.9	634215	85922.4	147310	1.0292e+06	53896.8	498368	91778.8	37585.1	118246	69054.8	166227	215537	319870	265634	35116	9572.24	1462.63	120736	219409	259717	430411	5461.09	56260.6	174645	210455	16521.4	39142.3	62980.4	2615.02	272134	128495	341226	73614.7	964609	483487	2307.82	783.39	6161.62	7418.57	11931.1	1353.41	750998	1.32084e+06	58800	40911.2	289973
G01	Glioma	210455	233545	1.72864e+06	125825	162333	1.18295e+06	52999.1	573688	109183	31858.7	289973	93809.9	137388	192155	115948	118246	26628.8	40911.2	2307.82	43462.2	15601.5	239372	65625.4	2857.25	47071.9	151674	197286	25.4102	60337.4	87817.2	7647.79	184175	155499	705913	120736	297815	683998	10997.8	1043.15	16097.2	11931.1	16976	3580.29	800165	430411	99591.6	31033.5	272134
G02	Glioma	224529	249377	47.744	634215	134698	2.73257e+06	227985	887847	50829.4	29562.5	348400	97285.3	48897.5	473340	545802	42576.2	46110.3	28680.1	47.744	49854.1	70529.2	200539	312846	54950.4	123688	617971	330142	649882	40911.2	239372	25920.4	385093	573688	683998	162333	144022	1.41588e+06	47.744	1648.99	5277.34	6161.62	13976.7	6941.72	404122	2.10564e+06	233545	44439.3	91778.8
G03	Glioma	285037	64215.1	1.66425e+06	634215	131740	1.27049e+06	18042	664784	57393.7	20865.9	125825	80151.6	76967.9	137388	326084	205199	24699.2	38385.1	8897.02	27372.1	25311.2	348400	200539	2208.6	40082.3	289973	210455	319870	75212.7	144022	26628.8	162333	184175	887847	31858.7	508577	800165	12191.3	47.744	6161.62	13245.1	10044.6	2719.01	589164	2.04051e+06	40911.2	19056.9	297815
G04	Glioma	224529	192155	887847	728978	197286	1.78182e+06	33502	634215	47071.9	210455	404122	82309.5	137388	111101	272134	85922.4	22160.3	38385.1	707.627	36786	28015.4	160668	123688	25920.4	4640.85	285037	151674	341226	52180.2	71967.3	11609.5	200539	265634	508577	87817.2	534902	993996	4369.64	128.103	4233.2	15116.9	9127.75	4515.1	557587	1.06803e+06	41753.5	16976	348400
G05	Glioma	205199	15.2588	15.2588	728978	179438	927164	69054.8	334201	18042	65625.4	319870	61680.1	19628.8	131740	80151.6	162333	15116.9	52180.2	7163.75	17520.6	89859.6	192155	200539	12191.3	56260.6	137388	244734	545802	35962.4	58800	1043.15	358377	155499	634215	48897.5	99591.6	705913	6352.76	5795.26	2719.01	5633.71	10496.9	2110.74	589164	1.53089e+06	46110.3	45219.3	265634
G06	Glioma	170061	76967.9	830424	2401.78	60337.4	1.0292e+06	1.47293e+06	420360	4233.2	56260.6	197286	40911.2	65625.4	131740	188789	54950.4	25920.4	45664.8	399.286	47071.9	27372.1	210455	70529.2	115948	44439.3	89859.6	312846	39142.3	57393.7	61680.1	5.10742	125825	140628	128495	82309.5	109183	705913	2208.6	783.39	7647.79	5100.95	9572.24	2955.42	728978	602202	67353.9	64215.1	205199
G07	Glioma	184175	278295	1.41588e+06	830424	57393.7	520944	10997.8	775673	56260.6	48897.5	473340	69054.8	374108	289973	151674	104070	52180.2	73614.7	2503.77	10300.7	44439.3	254846	215537	38385.1	120736	123688	128495	365518	23980.5	95521.7	8498.51	99591.6	249377	205199	144022	462888	993996	12499.9	1197.94	7163.75	9836.94	8084.66	1043.15	452448	1.72864e+06	18537.8	22160.3	170061
G08	Glioma	140628	115948	15.2588	118246	78513.8	2.16636e+06	83937.6	259717	67353.9	53896.8	131740	89859.6	210455	215537	125825	70529.2	47925.9	58800	5100.95	101758	31858.7	219409	62980.4	12861.5	91778.8	272134	159003	4369.64	28680.1	80151.6	3181.83	147310	192155	155499	233545	589164	634215	6761.15	955.583	12191.3	11931.1	13976.7	2401.78	887847	964609	52999.1	26628.8	87817.2
G09	Glioma	144022	15.2588	589164	462888	109183	1.06803e+06	43462.2	498368	28015.4	70529.2	118246	113410	188789	326084	197286	35962.4	39142.3	41753.5	5962.84	40911.2	29562.5	123688	131740	21437.3	115948	259717	174645	664784	23252.4	47925.9	9350.26	56260.6	358377	348400	76967.9	166227	1.47293e+06	4941.04	293.793	8897.02	10044.6	8675.24	4233.2	573688	800165	134698	71967.3	99591.6
G10	Glioma	65625.4	118246	775673	128495	170061	1.11432e+06	42576.2	259717	30393.3	60337.4	162333	47071.9	10781.7	272134	233545	78513.8	35116	11931.1	2307.82	21437.3	43462.2	134698	227985	14348.1	91778.8	159003	137388	12861.5	29562.5	47925.9	6941.72	184175	219409	634215	174645	483487	205199	4640.85	5277.34	6761.15	7418.57	13542.2	1043.15	705913	589164	62980.4	25920.4	224529
G11	Glioma	188789	2.66378	20280.5	184175	106739	1.14758e+06	205199	394708	115948	46110.3	285037	109183	192155	385093	99591.6	159003	42576.2	32648.6	1562.2	53896.8	58800	93809.9	155499	33502	140628	297815	334201	10997.8	45219.3	82309.5	6761.15	442327	215537	174645	272134	104070	1.47293e+06	3313.39	516.843	5962.84	10496.9	10044.6	3067.31	602202	1.53089e+06	38385.1	22684.5	111101
G12	Glioma	131740	67353.9	278295	2208.6	115948	859884	147310	374108	50829.4	21437.3	82309.5	97285.3	14753.2	227985	137388	61680.1	14348.1	28015.4	2007.85	23980.5	44439.3	254846	120736	27372.1	99591.6	57393.7	128495	10496.9	28680.1	85922.4	4793.04	159003	244734	233545	179438	334201	664784	875.64	1043.15	7872.36	9350.26	9572.24	7418.57	750998	1.0292e+06	60337.4	40082.3	155499
G13	Glioma	254846	0.220152	1.32084e+06	2955.42	95521.7	2.04051e+06	634215	319870	15601.5	47925.9	159003	60337.4	120736	272134	179438	50829.4	23252.4	67353.9	4640.85	106739	52180.2	140628	188789	43462.2	82309.5	334201	219409	26628.8	18537.8	73614.7	14348.1	358377	147310	131740	144022	374108	830424	3181.83	5100.95	5962.84	6161.62	12191.3	1907.29	617971	964609	56260.6	54950.4	170061
G14	Glioma	147310	452448	2.66378	219409	162333	1.37328e+06	179438	348400	34281.6	39142.3	140628	53896.8	83937.6	144022	210455	95521.7	18042	46110.3	1462.63	20280.5	23980.5	205199	111101	52180.2	118246	109183	188789	25311.2	42576.2	104070	8498.51	123688	159003	259717	99591.6	462888	557587	5100.95	875.64	11317.5	10781.7	8897.02	1197.94	411925	775673	40082.3	45219.3	224529
G15	Glioma	115948	134698	602202	155499	2.66378	1.22672e+06	128495	272134	293.793	57393.7	249377	34281.6	60337.4	137388	47925.9	188789	38385.1	24699.2	1113.49	15601.5	52999.1	111101	93809.9	40911.2	91778.8	192155	159003	12861.5	19056.9	64215.1	7872.36	224529	162333	67353.9	197286	174645	545802	10044.6	1043.15	13976.7	5795.26	13245.1	1197.94	634215	649882	62980.4	40082.3	200539
G16	Glioma	87817.2	305768	111101	197286	69054.8	483487	65625.4	192155	39142.3	82309.5	62980.4	58800	9350.26	224529	34281.6	128495	12861.5	47925.9	15.2588	22160.3	37585.1	91778.8	43462.2	12499.9	109183	147310	144022	27372.1	25311.2	60337.4	18537.8	289973	162333	259717	188789	430411	319870	1277.11	399.286	4369.64	16976	7647.79	2208.6	634215	326084	56260.6	20280.5	227985
G17	Glioma	170061	483487	1.32084e+06	508577	134698	1.18295e+06	38385.1	348400	19628.8	34281.6	297815	41753.5	25920.4	179438	101758	159003	52180.2	44439.3	7872.36	26628.8	16097.2	210455	89859.6	31858.7	42576.2	85922.4	155499	404122	29562.5	46110.3	1197.94	358377	200539	192155	205199	91778.8	430411	2401.78	15.2588	2110.74	8675.24	11317.5	2857.25	683998	1.0292e+06	35962.4	23252.4	244734
G18	Glioma	159003	20280.5	1.14758e+06	1197.94	97285.3	927164	8274.14	859884	16976	91778.8	50829.4	101758	73614.7	289973	205199	151674	8897.02	39142.3	11317.5	23252.4	30393.3	227985	118246	61680.1	71967.3	326084	239372	341226	35962.4	80151.6	1462.63	617971	120736	188789	89859.6	442327	1.0292e+06	5277.34	4515.1	7163.75	9836.94	17520.6	2955.42	589164	1.66425e+06	41753.5	33502	233545
G19	Glioma	76967.9	20865.9	93809.9	227985	249377	1.0292e+06	67353.9	473340	31033.5	42576.2	101758	89859.6	57393.7	305768	215537	140628	21437.3	44439.3	6941.72	24699.2	14753.2	131740	115948	35962.4	106739	411925	224529	462888	27372.1	82309.5	6761.15	341226	297815	205199	54950.4	285037	1.47293e+06	4078.04	2007.85	5795.26	18537.8	10997.8	3580.29	483487	830424	26628.8	45219.3	197286
G20	Glioma	442327	147310	2.2481e+06	9350.26	123688	2.38561e+06	60337.4	411925	17520.6	39142.3	155499	52999.1	224529	483487	28680.1	289973	30393.3	45219.3	1562.2	70529.2	131740	312846	118246	37585.1	67353.9	106739	272134	7418.57	32648.6	76967.9	10781.7	144022	95521.7	166227	170061	385093	649882	2955.42	3848.13	11931.1	6941.72	8498.51	2615.02	508577	1.27049e+06	65625.4	40911.2	215537
G21	Glioma	224529	70529.2	64215.1	430411	118246	1.14758e+06	2.04051e+06	394708	22160.3	58800	244734	27372.1	39142.3	192155	54950.4	61680.1	20280.5	47925.9	5962.84	28680.1	26628.8	254846	85922.4	48897.5	30393.3	131740	179438	265634	31033.5	87817.2	1832.63	111101	155499	205199	144022	705913	1.18295e+06	1742.07	2857.25	8084.66	13542.2	8675.24	4078.04	664784	483487	29562.5	31858.7	125825
G22	Glioma	259717	36.5771	830424	155499	104070	1.0292e+06	89859.6	319870	60337.4	64215.1	289973	166227	137388	36.5771	131740	151674	33502	23980.5	10997.8	37585.1	24699.2	91778.8	106739	32648.6	120736	394708	184175	38385.1	30393.3	80151.6	29562.5	8498.51	147310	109183	162333	67353.9	859884	36.5771	4515.1	4369.64	8084.66	8274.14	2208.6	508577	1.47293e+06	52180.2	25311.2	179438
G23	Glioma	184175	131740	927164	278295	128495	1.06803e+06	87817.2	385093	73614.7	35962.4	147310	137388	140628	285037	62980.4	159003	56260.6	39142.3	1043.15	64215.1	16976	111101	71967.3	31033.5	134698	219409	249377	30393.3	25920.4	52180.2	8084.66	227985	170061	272134	348400	46110.3	830424	4640.85	3067.31	3951.97	9572.24	10997.8	2401.78	589164	1.98209e+06	61680.1	41753.5	305768
G24	Glioma	179438	305768	830424	1.32084e+06	151674	1.11432e+06	775673	249377	75212.7	40911.2	83937.6	80151.6	28015.4	2.66378	147310	174645	9836.94	23252.4	3580.29	37585.1	16097.2	166227	97285.3	8498.51	118246	326084	144022	5277.34	39142.3	115948	12191.3	192155	162333	508577	200539	358377	705913	4369.64	128.103	3951.97	6941.72	11931.1	2110.74	589164	1.14758e+06	65625.4	23980.5	259717
[truncated: 289 more columns]

## Sheet: Cohort 4
Normalized iBAQ values of 361 quantified proteins in Cohort 4 and the expression level of SERPINA6 was analysised
Sample	Type	SERPINA6	IGLV4-69	IGLV2-18	IGLV3-10	IGLV3-9	IGKV2-28	IGHV4-4	IGKV2-24	IGKV1-27	IGLV5-45	IGKV2-40	IGKV3D-11	IGHV3-49	IGKV6D-21	IGHV6-1	IGHV3-15	IGHV2-26	IGHV3-74	IGHV3-43	IGLV9-49	IGHV3-72	IGKV3D-20	IGHV1-3	IGHV3-20	IGHV1-24	IGHV4-28	IGHV3-35	IGHV3-38	IGHV5-51	IGHV3-64D	IGLC7	IGKV2-29	ALBU	ALB	PRSS1	KRT10	K22E	KRT6C	Q1RMN8	F5	MASP2	QSOX1	CHL1	APOL1	CD5L	FCGR3B	ERN1	FCN3
VC01	Control	500634	313791	320924	475760	826420	218598	98612.9	208112	875876	300894	395662	1023808	294298	95541.4	345576	307974	84994.2	83070.3	76279.5	93185	455253	259210	896264	10917.2	135022	11968	45530.9	55529.6	804080	180426	175302	2898870	222004500	142670	7018845	9533.01	2622.49	720498	88549.6	761.553	7871.09	8985.28	1572.65	371682	3199190	51106.4	2212.72	214540
VC02	Control	804080	171514	218598	197894	826420	63569.2	65103.1	124806	428132	276400	175302	875876	149278	35339.8	113779	353609	16452.3	35841.8	36761.6	15967.8	419084	153386	327791	521.167	21177.3	9827.29	28607	70730.2	564374	158771	265324	1889470	222004500	208112	4920200	6972.62	1304.7	896264	107595	661.054	16889	12244.9	2897.44	438352	1146687	54154.2	8498.65	294298
VC03	Control	758104	229854	578856	720498	419084	84994.2	44426.9	281154	564374	138038	208112	673525	175302	36761.6	78491.4	162965	14271	38256.4	70730.2	31521.8	223222	158771	500634	4142.24	20288.5	12493.1	30236.8	83070.3	345576	167578	88549.6	1780760	222004500	244748	4016265	5631.76	6465.15	1.089e+06	22772.8	1196.4	14641	11173.1	1304.7	475760	927126	52816.2	13343.7	289060
VC04	Control	589052	294298	149278	446656	1485155	142670	44426.9	208112	463584	223222	335752	778116	233812	32069.2	73436.5	281154	28607	29132.2	51822.5	7871.09	513690	127667	1429260	7120.2	61731.5	6972.62	21177.3	81844.9	673525	135022	121395	2428220	222004500	259210	300894	56727.3	6809.45	896264	76279.5	661.054	12244.9	8985.28	4142.24	475760	1971990	58372.2	6465.15	407845
VC05	Control	758104	289060	428132	377732	657316	60217.6	69124.4	218598	395662	153386	327791	732581	251654	107595	78491.4	145652	5631.76	50215.4	43596.6	66551.1	488157	162965	953264	594.153	16452.3	7120.2	24166.5	98612.9	513690	124806	180426	2428220	222004500	240355	4295545	2212.72	1348.63	1970.71	40927.4	877.834	15597.8	10597.6	1040.88	896264	1780760	33989.6	1304.7	361251
VC06	Control	896264	218598	208112	233812	361251	40118.6	10597.6	438352	419084	223222	259210	1232185	201788	117106	59397.9	162965	13343.7	25842.5	7360.8	5631.76	240355	52816.2	615026	14271	38256.4	10262.5	29547.7	78491.4	648139	56727.3	83070.3	1922610	222004500	276400	4594235	1436.53	2058.24	1023808	51106.4	991.322	18223.2	15967.8	1572.65	927126	657316	21177.3	1823.87	313791
VC07	Control	853641	180426	149278	455253	1184250	76279.5	24166.5	272335	419084	201788	313791	896264	58372.2	40118.6	57625.4	117106	15967.8	14641	32069.2	66551.1	371682	208112	826420	11968	33989.6	5155.65	16452.3	49425.5	320924	48404.9	121395	2080700	222004500	104736	4295545	145652	32905	1329895	40927.4	395.379	4680.56	12244.9	2397.02	657316	1146687	41814.1	1155.07	88549.6
VC08	Control	896264	289060	229854	345576	1281600	95541.4	80376.1	214540	419084	272335	197894	826420	55529.6	40927.4	104736	186814	66551.1	20853.7	46234.7	51106.4	281154	158771	875876	4406.51	27365.5	7661.6	9214.45	60217.6	545278	91333	102268	2080700	222004500	67714.7	4594235	44426.9	6026.99	1.089e+06	40118.6	1304.7	18223.2	14020.4	2813.64	589052	1573440	58372.2	1107.85	335752
VC09	Control	953264	218598	201788	335752	1023808	15967.8	56727.3	186814	438352	98612.9	276400	475760	54154.2	13343.7	131810	93185	45530.9	9398.7	47348.6	124806	251654	127667	615026	16452.3	41814.1	19474.2	10262.5	44426.9	446656	145652	83070.3	1485155	222004500	86663.6	4920200	30776.8	5155.65	1329895	8730.5	1703.83	14641	14020.4	2622.49	826420	578856	40118.6	4293.3	38256.4
VC10	Control	648139	578856	778116	229854	500634	193137	37409.2	127667	927126	4594235	385154	685913	167578	72146.4	104736	251654	22266.8	131810	272335	240355	428132	244748	1329895	2897.44	102268	8730.5	70730.2	162965	701510	95541.4	145652	2731910	222004500	49425.5	6653905	7471.14	2504.9	2622.49	48404.9	761.553	23383	11352.3	1196.4	488157	1146687	25842.5	3273.3	345576
VD01	Glioma	552796	307974	335752	630331	875876	124806	265324	281154	500634	208112	419084	986538	826420	98612.9	127667	395662	28009.2	49425.5	48404.9	229854	251654	93185	2474010	5803.8	193137	32069.2	38256.4	107595	1429260	121395	758104	2731910	222004500	475760	8574780	40927.4	5345.68	488157	76279.5	877.834	6972.62	15223	1520.82	564374	1.089e+06	32905	362.834	158771
VD02	Glioma	720498	244748	201788	896264	986538	107595	49425.5	294298	272335	171514	320924	826420	153386	51106.4	72146.4	158771	38256.4	18223.2	35841.8	25356.2	259210	86663.6	1.089e+06	15967.8	74880.8	4406.51	33989.6	127667	361251	214540	124806	1521805	222004500	520519	7732765	28607	3163.18	531846	32905	991.322	14641	11655.1	1635.63	500634	853641	26715.7	2122.38	307974
VD03	Glioma	500634	102268	208112	419084	648139	98612.9	40927.4	289060	345576	14641	395662	804080	124806	51822.5	84994.2	175302	21177.3	18761.9	63569.2	8730.5	272335	201788	927126	31521.8	43596.6	32069.2	25356.2	113779	320924	180426	463584	1232185	222004500	488157	3833045	35339.8	7871.09	758104	76279.5	1635.63	14271	11173.1	1348.63	732581	1023808	46234.7	4031.33	371682
VD04	Glioma	552796	229854	251654	313791	826420	59397.9	80376.1	153386	335752	171514	345576	896264	149278	30236.8	72146.4	218598	14641	39143.1	19474.2	24856.5	281154	107595	1429260	1970.71	142670	20288.5	51106.4	88549.6	673525	56727.3	186814	1889470	222004500	428132	4295545	13634	1107.85	701510	41814.1	702.135	17780.5	7871.09	1774.57	598056	1023808	44426.9	8985.28	500634
VD05	Glioma	578856	953264	289060	1521805	564374	33989.6	59397.9	240355	428132	335752	353609	475760	300894	40118.6	72146.4	233812	22266.8	10262.5	98612.9	38256.4	419084	124806	853641	4406.51	15597.8	17372.6	18761.9	153386	407845	131810	135022	1889470	222004500	438352	5629980	16889	6272	488157	86663.6	761.553	15967.8	10917.2	1635.63	720498	1232185	49425.5	9398.7	214540
VD06	Glioma	853641	201788	281154	419084	455253	39143.1	59397.9	149278	513690	107595	353609	701510	135022	88549.6	104736	171514	26715.7	33442.5	36761.6	35841.8	272335	145652	1232185	7661.6	80376.1	13634	30776.8	102268	598056	193137	320924	1889470	222004500	428132	4295545	18761.9	6972.62	875876	76279.5	1107.85	15597.8	11968	1774.57	804080	1485155	20288.5	6465.15	377732
VD07	Glioma	673525	153386	265324	578856	615026	78491.4	66551.1	313791	758104	589052	361251	778116	371682	37409.2	113779	180426	45530.9	25842.5	52816.2	65103.1	385154	171514	1429260	48404.9	58372.2	16889	32905	131810	377732	167578	193137	1607365	222004500	335752	4016265	51106.4	8271.36	520519	110637	702.135	11173.1	13343.7	3523.79	488157	1281600	57625.4	1635.63	229854
VD08	Glioma	720498	214540	300894	428132	488157	83070.3	69124.4	259210	276400	218598	294298	630331	180426	107595	135022	171514	21177.3	12244.9	61731.5	40118.6	335752	86663.6	589052	11968	35841.8	22772.8	46234.7	93185	455253	251654	289060	186814	222004500	307974	3833045	37409.2	2397.02	732581	43596.6	1256.55	7871.09	9398.7	1635.63	986538	701510	27365.5	14641	201788
VD09	Glioma	446656	240355	545278	531846	826420	59397.9	52816.2	307974	598056	395662	281154	1232185	107595	18761.9	127667	131810	30236.8	24166.5	32069.2	74880.8	428132	158771	896264	56727.3	35841.8	16452.3	44426.9	138038	552796	180426	419084	223222	222004500	407845	5204870	65103.1	7661.6	720498	34571.4	823.335	11655.1	15967.8	2622.49	463584	1.089e+06	48404.9	9827.29	233812
VD10	Glioma	701510	313791	272335	875876	615026	78491.4	60217.6	281154	300894	208112	345576	927126	81844.9	56727.3	117106	162965	37409.2	22266.8	86663.6	76279.5	361251	138038	1281600	27365.5	83070.3	17780.5	41814.1	145652	520519	186814	107595	1838265	222004500	158771	6049050	20288.5	1304.7	673525	73436.5	395.379	7471.14	14271	2897.44	545278	564374	65103.1	85.9878	289060
[truncated: 313 more columns]
