# Supplementary material for: Development of a Metabolic Subtype Classifier for Low- Grade Glioma to Guide Precision Therapy
Source: Research Square preprint supplement (doi:10.21203/rs.3.rs-7778086/v1), 2025-12-16
Supplement: Supplementary file 6 [file adk1721_Data_S3.xlsx]

## Sheet: Cohort 1
55 significantly differential proteins between pV and gA
Uniprot ID	Gene Name	p value	FDR	FC	Significant
P30043	BLVRB	0.000573476	0.0125017	9.41229	Up
P02775	PPBP	3.05176e-05	0.0040775	8.90908	Up
Q12860	CNTN1	0.00167847	0.0212786	8.38837	Up
P07996	THBS1	6.10352e-05	0.0040775	7.69667	Up
P09486	SPARC	0.000668748	0.0125017	7.48653	Up
P06703	S100A6	0.000152588	0.00670037	7.00194	Up
P02776	PF4	0.000153444	0.00670037	6.81377	Up
P00915	CA1	0.000556422	0.0125017	6.29532	Up
P04040	CAT	0.000967132	0.0146186	5.68794	Up
P00441	SOD1	0.00100708	0.0146586	5.47086	Up
P02042	HBD	0.000177083	0.00695936	3.78256	Up
P22392	NME2	0.00643655	0.0459921	3.41658	Up
P60174	TPI1	0.000762939	0.0125017	3.28052	Up
P30041	PRDX6	0.00628662	0.0459921	3.16263	Up
A8MQ11	PMS2P5	0.00167847	0.0212786	2.98567	Up
P69905	HBA1	6.2252e-05	0.0040775	2.45807	Up
P12955	PEPD	0.00201256	0.0233205	2.35054	Up
P68871	HBB	9.70392e-05	0.00544806	2.29167	Up
P07738	BPGM	3.05176e-05	0.0040775	1.86237	Up
P04075	ALDOA	0.00525737	0.0413229	1.86183	Up
P07195	LDHB	0.000879071	0.013819	1.55103	Up
Q9NZP8	C1RL	0.000762939	0.0125017	1.48894	Up
P0DOX2	IGA2	0.00109394	0.0153542	1.26546	Up
O43866	CD5L	0.00504956	0.0413229	1.23673	Up
Q03591	CFHR1	0.00418091	0.0382116	1.20707	Up
P02745	C1QA	0.00438041	0.0382556	0.831498	Down
P08697	SERPINF2	0.0019614	0.0233205	0.83111	Down
Q9Y6R7	FCGBP	0.0051941	0.0413229	0.828174	Down
P29622	SERPINA4	0.000579834	0.0125017	0.805641	Down
P00738	HP	0.00250684	0.0266267	0.788713	Down
P05543	SERPINA7	0.00030906	0.00934312	0.784516	Down
P15151	PVR	0.00357724	0.0342891	0.775674	Down
P08709	F7	0.000281451	0.00921753	0.76414	Down
A2NJV5	IGKV2-29	0.00412805	0.0382116	0.761204	Down
P02786	TFRC	0.00068902	0.0125017	0.758361	Down
Q9NQ79	CRTAC1	0.00709879	0.0498183	0.74529	Down
P01701	IGLV1-51	0.000726514	0.0125017	0.740745	Down
Q15848	ADIPOQ	0.00602461	0.0455322	0.735508	Down
Q9NPH3	IL1RAP	0.000763465	0.0125017	0.725654	Down
Q12913	PTPRJ	0.00508983	0.0413229	0.698294	Down
P01817	IGHV2-5	0.000404959	0.0106099	0.674764	Down
P43251	BTD	0.000250874	0.00896306	0.668645	Down
Q9BXJ4	C1QTNF3	0.00561263	0.0432502	0.665396	Down
P01743	IGHV1-46	0.00213623	0.0233205	0.648742	Down
P80748	IGLV3-21	0.00128191	0.0173721	0.646759	Down
P00488	F13A1	5.28606e-05	0.0040775	0.645295	Down
P04432	IGKV1D-39	0.00335693	0.0338276	0.642754	Down
P13591	NCAM1	0.00762939	0.0499725	0.616448	Down
P01721	IGLV6-57	0.00753009	0.0499725	0.605273	Down
P60985	KRTDAP	0.00350948	0.0342891	0.601827	Down
O75015	FCGR3B	0.000348221	0.00977507	0.571748	Down
P13598	ICAM2	0.00762939	0.0499725	0.538631	Down
P12814	ACTN1	0.00335693	0.0338276	0.538433	Down
P68032	ACTC1	0.00213623	0.0233205	0.458655	Down
P67936	TPM4	0.00762939	0.0499725	0.45426	Down
55 significantly differential proteins between pV and gV
Uniprot ID	Gene Name	p value	FDR	FC	Significant
Q12860	CNTN1	0.00268555	0.027062	7.58534	Up
P30043	BLVRB	3.05176e-05	0.00226918	6.94056	Up
P02776	PF4	0.00131226	0.0180515	6.74085	Up
P09486	SPARC	0.00286559	0.0274678	6.4496	Up
P02775	PPBP	0.00213623	0.0245333	5.9673	Up
P00915	CA1	2.15389e-05	0.00211619	5.11525	Up
P07996	THBS1	0.00493247	0.0369183	4.84708	Up
P04040	CAT	0.000115129	0.00452457	4.76061	Up
P06703	S100A6	0.000874102	0.0163582	4.39995	Up
P12955	PEPD	0.00515747	0.0375349	3.89822	Up
P02042	HBD	6.10352e-05	0.00299835	3.79832	Up
A8MQ11	PMS2P5	0.000762939	0.0149918	3.6164	Up
P22392	NME2	0.00300439	0.0281125	3.25262	Up
P60174	TPI1	0.00240328	0.0255268	2.57954	Up
P00558	PGK1	0.00132188	0.0180515	2.57936	Up
P00918	CA2	0.000579834	0.0134044	2.50764	Up
P69905	HBA1	1.18698e-05	0.00155494	2.43979	Up
P07738	BPGM	9.16542e-05	0.00400223	2.29835	Up
P68871	HBB	8.08894e-06	0.00155494	2.29765	Up
P32119	PRDX2	0.000646203	0.0141088	2.14736	Up
Q9NZP8	C1RL	0.00128864	0.0180515	1.51993	Up
P07195	LDHB	0.000482219	0.0132483	1.43456	Up
P0DOX2	IGA2	0.00680165	0.0445508	1.35026	Up
Q8WUY3	PRUNE2	0.00543587	0.0381481	1.32548	Up
P10909	CLU	0.00285997	0.0274678	1.27015	Up
P00738	HP	0.00385729	0.0329547	0.829224	Down
P08697	SERPINF2	0.000481351	0.0132483	0.824733	Down
P25311	AZGP1	0.00131226	0.0180515	0.818346	Down
P02745	C1QA	0.00370859	0.0323883	0.805335	Down
P00488	F13A1	0.00735351	0.0458719	0.798959	Down
P29622	SERPINA4	0.00535526	0.0381481	0.794453	Down
P01834	IGKC	0.00705611	0.0447266	0.782385	Down
P05543	SERPINA7	8.92925e-06	0.00155494	0.779476	Down
O75015	FCGR3B	0.0011666	0.0180515	0.766495	Down
P33908	MAN1A1	0.00335561	0.0299717	0.760307	Down
P08185	SERPINA6	0.00430149	0.0352185	0.759729	Down
P0C0L4	C4A	0.0049788	0.0369183	0.74827	Down
A2NJV5	IGKV2-29	0.00412805	0.0345175	0.73154	Down
O00391	QSOX1	0.00237258	0.0255268	0.726021	Down
A0A087WSX0	IGLV5-45	0.00207169	0.0245333	0.715158	Down
A0A0C4DH38	IGHV5-51	0.00100708	0.0179901	0.703628	Down
P01717	IGLV3-25	0.00445914	0.0355313	0.692177	Down
P01767	IGHV3-53	0.00628662	0.0425973	0.656003	Down
P80748	IGLV3-21	0.00133205	0.0180515	0.603433	Down
P01817	IGHV2-5	0.00131226	0.0180515	0.600011	Down
P01701	IGLV1-51	0.000579834	0.0134044	0.575548	Down
Q9BXJ4	C1QTNF3	0.00328115	0.0299717	0.528708	Down
A0A0B4J1Y8	IGLV9-49	0.00762939	0.0468493	0.522874	Down
P60985	KRTDAP	0.0002835	0.00928464	0.507692	Down
P04432	IGKV1D-39	0.00587613	0.0405143	0.463047	Down
P01721	IGLV6-57	0.00213623	0.0245333	0.457289	Down
P68032	ACTC1	0.00654611	0.0436037	0.390025	Down
P12109	COL6A1	0.000213623	0.00763217	0.380682	Down
P37802	TAGLN2	0.00213623	0.0245333	0.374169	Down
P0DOX6	IGM	0.00697954	0.0447266	0.271855	Down
9 differential proteins between gA and gV
Uniprot ID	Gene Name	p value	FDR	FC	Significant
P04433	IGKV3-11	0.0129964	0.822156	1.32868	Up
P24592	IGFBP6	0.0232239	0.822156	1.59495	Up
Q9ULI3	HEG1	0.0232239	0.822156	2.49569	Up
P05019	IGF1	0.0255277	0.822156	1.80852	Up
Q12913	PTPRJ	0.0298875	0.822156	1.50658	Up
Q7Z460	CLASP1	0.0318794	0.822156	1.19669	Up
Q15053	KIAA0040	0.0378407	0.822156	0.575274	Down
P63104	YWHAZ	0.0392357	0.822156	0.653234	Down
Q9UNN8	PROCR	0.0437487	0.822156	0.700344	Down
74 significantly differential proteins between the glioma local environmental plasma (gA and gV) and pV
Sample	Serum	Patient	IGKV2-29	CD5L	F13A1	HP	CA1	IGLV1-51	HBD	C1QA	PPBP	PF4	TFRC	CAT	ALDOA	IGKV1D-39	SERPINA7	LDHB	BPGM	THBS1	SERPINF2	F7	IGA2	NCAM1	PVR	SERPINA4	BTD	HBB	HBA1	IGLV3-21	CFHR1	IL1RAP	CRTAC1	C1RL	FCGBP	FCGR3B	IGHV2-5	PEPD	PMS2P5	PRDX6	BLVRB	ACTC1	PTPRJ	ADIPOQ	ACTN1	TPI1	TPM4	CNTN1	IGLV6-57
LP01_gA	gA	LP01	681694	1.22365e+06	100678	29945625	309543	377399	260010	627998	113792	45958.9	13115.1	26415.7	6660.27	165985	203259	30557.9	23156.6	4606.5	2.33132e+06	15060.6	6.89816e+06	9504.01	10526.1	516620	43220.7	1.61284e+07	2.17423e+07	780843	696959	5707.48	5864.92	176523	17870.7	12595.3	155202	502.101	14511.5	387.045	10930.8	31202.6	1974.19	44923.2	2038.47	2568.39	3132.37	41.5594	65059.3
LP01_pV	pV	LP01	638968	1.22365e+06	96927.8	3.3532e+07	140751	413187	176523	667171	110030	84990.5	15060.6	14807.9	10316.5	145796	185911	23156.6	22721.2	5998.41	2.67906e+06	16570.1	6.57697e+06	6660.27	13383.2	504132	38864	1.05039e+07	1.52232e+07	780843	651302	4477.12	5239.34	155202	17163.6	10526.1	218445	257.536	13115.1	4013.7	3901.64	68253.8	1887.02	46936.7	4884.06	3010.98	9890.16	48.4772	33168
LP01_gV	gV	LP01	627998	1.3241e+06	61193	2.17423e+07	844330	322158	745189	528931	1.06203e+06	613933	10714.6	47946.5	9696.26	132499	165985	34669.5	40598.5	45958.9	2.15102e+06	10316.5	6.57697e+06	4477.12	9504.01	473251	35407.9	2.68924e+07	3.93201e+07	696959	598542	3516.06	4735.82	218445	13383.2	5239.34	126910	551.961	46936.7	31202.6	44923.2	22721.2	1301.47	32384.6	1974.19	12900.7	1091.96	2038.47	28127.8
LP02_gA	gA	LP02	1.2708e+06	2236725	65059.3	3.50889e+06	253316	627998	413187	394501	110030	89103.4	13950.7	9890.16	9504.01	484181	296010	9224.34	15060.6	2568.39	2.41896e+06	7936.29	5.28361e+06	4477.12	8999.3	367137	53579.9	2.39813e+07	2.03308e+07	1.41811e+06	185911	16201	4013.7	96927.8	21340.1	44923.2	57285.2	1974.19	5539.16	7378.26	16570.1	4606.5	2210.46	24654.2	771.549	121.775	2833.18	5864.92	180220
LP02_pV	pV	LP02	1.00596e+06	2236725	84990.5	3.06076e+06	1.13338e+06	473251	2.41896e+06	343731	432503	544988	6660.27	45958.9	17527.4	140751	235653	20834.2	35407.9	22189.3	2.33132e+06	5239.34	6.57697e+06	2288.29	10714.6	277926	52371.3	4.81019e+07	5.60324e+07	899323	223650	9224.34	3379.3	148278	15587	33811.5	98915.3	1678.71	18211.2	32384.6	69379.9	8999.3	1138.08	17163.6	4013.7	2915.88	11896.1	28127.8	120032
LP02_gV	gV	LP02	1.06203e+06	711897	33811.5	3.64928e+07	1.22365e+06	343731	638968	504132	1.13338e+06	598542	10714.6	73626.5	14511.5	155202	242742	23682	18631.2	45958.9	2.5061e+06	12900.7	7.22541e+06	6176.58	8999.3	336028	38864	2.68924e+07	3.3532e+07	1.09387e+06	145796	5239.34	6856.94	247960	16201	7378.26	159186	325.482	47946.5	62345.6	44923.2	24161.2	1974.19	29370.9	3625.91	2210.46	1753.69	14192	31899
LP03_gA	gA	LP03	1.37231e+06	844330	112053	3.93201e+07	102459	441968	126910	559764	253316	242742	9504.01	4317.9	15183.7	185911	296010	24161.2	18211.2	23156.6	2.58208e+06	14511.5	6.57697e+06	8774.7	6499.97	413187	51195.8	8.89559e+06	1.30592e+07	1.00596e+06	165985	6176.58	9696.26	176523	13691.5	8999.3	218445	34.6417	11454.2	33168	34.6417	148278	2568.39	37088.4	10930.8	1419.11	28127.8	723.206	44923.2
LP03_pV	pV	LP03	1.17805e+06	899323	110030	3.93201e+07	176523	350915	247960	516620	289777	180220	13115.1	10930.8	5707.48	124807	296010	16815.5	25831.8	17163.6	2.33132e+06	19707.1	6166550	3379.3	9224.34	413187	43220.7	1.05039e+07	1.61284e+07	696959	198672	5125.66	10316.5	301467	20114.1	10526.1	155202	1678.71	44923.2	1357.87	8999.3	24161.2	2743.42	44145.3	110.732	6.0295	2038.47	1247.92	62345.6
LP03_gV	gV	LP03	780843	1.41811e+06	27042.8	2.03308e+07	613933	316479	681694	504132	2.96176e+06	1.3241e+06	10316.5	33168	28127.8	198672	137475	23156.6	31899	70636.7	2.15102e+06	16815.5	6166550	3010.98	12900.7	441968	27685.4	2.39813e+07	29945625	1.17805e+06	301467	2288.29	5125.66	117151	9224.34	11896.1	212895	589.006	6.0295	15885.7	65059.3	37902	820.427	57285.2	460.923	13950.7	2471.45	7378.26	129336
LP04_gA	gA	LP04	899323	1.57114e+06	100678	3.3532e+07	110030	377399	176523	627998	53579.9	33811.5	11695	9224.34	3253.67	206999	242742	8512.76	20834.2	7378.26	2.33132e+06	22189.3	5.28361e+06	8999.3	17870.7	516620	42163.5	6.89816e+06	1.30592e+07	1776350	316479	4477.12	7179.48	129336	14192	12595.3	358809	192.005	15306.8	33168	22.154	55910.9	1091.96	78264.8	930.177	417.101	7713.26	820.427	159186
LP04_pV	pV	LP04	117151	1.92916e+06	44923.2	1.61284e+07	1.3241e+06	76883.9	681694	613933	1.6386e+06	1.17805e+06	41435.9	57285.2	27685.4	7936.29	86912.6	15885.7	47946.5	143155	1.03297e+06	37902	1.30592e+07	723.206	15060.6	145796	2210.46	2.39813e+07	3.93201e+07	212895	571270	9224.34	11454.2	242742	10115.7	3772.33	10526.1	2833.18	208.025	191076	35407.9	8512.76	1189.79	2654.21	208.025	7378.26	9696.26	208.025	208.025
LP05_gA	gA	LP05	473251	528931	173062	5.60324e+07	316479	229148	844330	627998	185911	126910	49803.9	2833.18	5707.48	441968	358809	17163.6	18211.2	9890.16	2.77543e+06	12339.3	3.36421e+06	4013.7	19707.1	336028	35407.9	6.57697e+06	1.05039e+07	598542	667171	6322.51	1678.71	223650	15587	25222.9	36223	551.961	12595.3	60025.5	11695	19376	1609.45	27685.4	1549.18	6660.27	3772.33	357.933	37902
LP05_pV	pV	LP05	493632	516620	191076	5.60324e+07	108038	309543	544988	711897	83535.4	68253.8	62345.6	879.359	1974.19	413187	394501	10526.1	11172	3516.06	2.85404e+06	13950.7	3.36421e+06	5125.66	20406.3	358809	48870	3.61697e+06	4.11681e+06	696959	681694	10714.6	4606.5	206999	11695	31202.6	73626.5	671.396	4884.06	51195.8	147.57	30557.9	1609.45	21775.3	3010.98	8156.84	6176.58	147.57	33168
LP05_gV	gV	LP05	441968	528931	145796	5.60324e+07	493632	272862	1.13338e+06	667171	104905	91026	53579.9	13383.2	4884.06	253316	358809	17527.4	18211.2	1811.45	2.67906e+06	12900.7	3.36421e+06	4013.7	20114.1	343731	39845.1	16914500	18849750	571270	711897	5539.16	1974.19	203259	15587	25831.8	44923.2	1357.87	26415.7	6499.97	32384.6	16815.5	1549.18	34669.5	1419.11	7713.26	3379.3	1189.79	55910.9
LP06_gA	gA	LP06	559764	876733	110030	4.81019e+07	1.37231e+06	272862	1.03297e+06	528931	1.09387e+06	667171	13115.1	69379.9	36223	462368	137475	23682	30557.9	24161.2	2.0316e+06	11896.1	5.07597e+06	5003.22	12339.3	358809	27042.8	2.68924e+07	3.3532e+07	780843	423774	1484.51	4735.82	247960	2471.45	18631.2	89103.4	162.322	47946.5	34669.5	134805	42163.5	630.331	39845.1	2833.18	11454.2	8156.84	22721.2	49803.9
LP06_pV	pV	LP06	528931	1.3241e+06	159186	4.36427e+07	667171	94993.8	272862	745189	32384.6	5539.16	10115.7	21340.1	23156.6	12339.3	169710	19707.1	29370.9	820.427	1.57114e+06	22189.3	7.22541e+06	5003.22	11172	206999	14807.9	1.1533e+07	1.22832e+07	145796	516620	6322.51	4477.12	162356	5864.92	15306.8	42163.5	4735.82	68253.8	104905	43220.7	177.163	1678.71	16815.5	177.163	1484.51	1753.69	1974.19	177.163
LP06_gV	gV	LP06	780843	1.2708e+06	69379.9	2.68924e+07	1.5162e+06	876733	1.41811e+06	559764	423774	265289	10115.7	61193	16815.5	413187	185911	24654.2	33811.5	4884.06	2.0316e+06	4606.5	7.22541e+06	2568.39	5864.92	247960	21340.1	3.3532e+07	5.60324e+07	1.09387e+06	385034	2743.42	4477.12	84990.5	11695	7713.26	104905	983.125	23156.6	27042.8	102459	20406.3	417.101	18211.2	1609.45	15587	3132.37	14511.5	58705.1
LP07_gA	gA	LP07	1.5162e+06	1.17805e+06	122068	4.81019e+07	173062	949924	296010	800808	60025.5	28745.4	15587	5707.48	11896.1	1.09387e+06	277926	17870.7	4013.7	1887.02	1.92916e+06	10526.1	6.57697e+06	5239.34	8512.76	301467	40598.5	1.30592e+07	1.52232e+07	1.22365e+06	404254	3772.33	9504.01	63703.3	15306.8	25831.8	80300.7	162.322	7179.48	2743.42	3625.91	37902	820.427	52371.3	1549.18	1678.71	5125.66	6.0295	140751
LP07_pV	pV	LP07	544988	1.57114e+06	84990.5	3.3532e+07	1.03297e+06	145796	899323	451065	11695	2288.29	9696.26	41435.9	20114.1	68253.8	206999	23156.6	29370.9	5003.22	1.3241e+06	8156.84	1.05039e+07	4159.09	9504.01	155202	229148	2.39813e+07	29945625	289777	726894	10316.5	7554.52	212895	11172	27685.4	18211.2	2210.46	151915	11454.2	55910.9	132.819	630.331	1974.19	502.101	10526.1	132.819	2654.21	7179.48
LP08_gA	gA	LP08	1.3241e+06	1.6386e+06	78264.8	3.64928e+07	583710	413187	651302	627998	1.03297e+06	876733	11172	44923.2	13691.5	176523	194874	14511.5	26415.7	21775.3	2.5061e+06	8304	8.89559e+06	5539.16	10316.5	283792	29370.9	2.17423e+07	3.3532e+07	451065	329137	5707.48	11454.2	229148	15587	2119	165985	9.66641	36223	17870.7	93142.6	7713.26	1753.69	73626.5	671.396	8512.76	9.66641	15060.6	31899
LP08_pV	pV	LP08	1.46353e+06	1.13338e+06	100678	3.93201e+07	126910	528931	194874	583710	63703.3	46936.7	15885.7	7378.26	7554.52	358809	218445	15306.8	14807.9	2654.21	2.67906e+06	10714.6	7.22541e+06	5003.22	19376	404254	33168	1.1533e+07	1.4416e+07	711897	289777	6322.51	19707.1	185911	20834.2	10526.1	148278	110.732	10115.7	1419.11	15060.6	40598.5	1887.02	72073.6	1357.87	3901.64	6499.97	630.331	66382.4
LP08_gV	gV	LP08	1.57114e+06	1.46353e+06	113792	3.64928e+07	432503	451065	1.13338e+06	696959	108038	96927.8	13950.7	19001.5	8512.76	191076	134805	16201	43220.7	2654.21	2.58208e+06	9504.01	6.89816e+06	6176.58	15587	289777	31202.6	1.52232e+07	2.17423e+07	780843	322158	5998.41	11695	159186	16815.5	7179.48	155202	671.396	25222.9	10316.5	44923.2	18211.2	1811.45	60025.5	1138.08	5239.34	2210.46	2119	46936.7
LP09_pV	pV	LP09	638968	949924	52371.3	3.93201e+07	504132	253316	598542	358809	173062	343731	3516.06	24654.2	16815.5	122068	145796	29370.9	19707.1	4159.09	2236725	11172	8.89559e+06	2743.42	7713.26	309543	45958.9	2.39813e+07	2.68924e+07	667171	404254	4884.06	4606.5	165985	11454.2	25222.9	69379.9	820.427	28127.8	8774.7	33168	6499.97	1138.08	15306.8	1301.47	5864.92	4317.9	4477.12	86912.6
LP09_gV	gV	LP09	651302	979210	57285.2	3.93201e+07	745189	260010	876733	385034	198672	377399	3901.64	40598.5	12595.3	124807	126910	17163.6	21340.1	7713.26	2236725	10714.6	1.05039e+07	2833.18	6660.27	309543	43220.7	2.39813e+07	29945625	681694	367137	3132.37	6499.97	143155	10526.1	31899	41435.9	257.536	24161.2	16570.1	65059.3	13950.7	1189.79	14807.9	1974.19	2370.79	11896.1	9504.01	93142.6
LP10_gA	gA	LP10	316479	1.6386e+06	40598.5	5.60324e+07	385034	61193	367137	559764	336028	301467	13691.5	7554.52	11695	112053	86912.6	25831.8	14192	32384.6	1.5162e+06	13383.2	1.61284e+07	3010.98	7936.29	73626.5	19001.5	1.3703e+07	16914500	277926	876733	5392.76	7179.48	223650	15306.8	16201	28745.4	3625.91	93142.6	341.708	24654.2	2119	341.708	341.708	341.708	1301.47	341.708	2038.47	341.708
LP10_pV	pV	LP10	1.84621e+06	949924	98915.3	5.60324e+07	46936.7	493632	8774.7	516620	70636.7	94993.8	12900.7	3772.33	5239.34	148278	235653	5003.22	11172	1887.02	3.50889e+06	9504.01	8.89559e+06	4317.9	15587	212895	45958.9	1.13338e+06	1.41811e+06	1.17805e+06	681694	5125.66	6176.58	93142.6	23156.6	37902	55910.9	357.933	10115.7	84.1702	4013.7	84.1702	1189.79	20834.2	1753.69	84.1702	4159.09	502.101	73626.5
LP10_gV	gV	LP10	1.41811e+06	1.22365e+06	54519.7	5.60324e+07	484181	301467	559764	451065	949924	1.03297e+06	9504.01	17163.6	10930.8	148278	176523	19001.5	17527.4	9696.26	2.85404e+06	10714.6	8.89559e+06	6499.97	8774.7	212895	31899	2.03308e+07	29945625	1.06203e+06	800808	4013.7	4159.09	132499	19707.1	31202.6	20834.2	257.536	52371.3	5003.22	35407.9	2743.42	2471.45	22721.2	930.177	2833.18	1419.11	1609.45	33811.5
LP11_gA	gA	LP11	1.69769e+06	1.46353e+06	102459	2.68924e+07	84990.5	301467	104905	711897	120032	145796	23156.6	2568.39	14807.9	108038	229148	12128.7	1609.45	5539.16	2.41896e+06	14192	4.11681e+06	3379.3	14511.5	260010	45958.9	6.89816e+06	1.22832e+07	1.5162e+06	571270	5998.41	10526.1	51195.8	12595.3	16201	134805	460.923	10316.5	1753.69	2370.79	76883.9	1484.51	39845.1	6322.51	1549.18	17527.4	34.6417	132499
LP11_pV	pV	LP11	1.69769e+06	1.5162e+06	91026	2.39813e+07	272862	404254	462368	451065	385034	844330	27042.8	12595.3	6660.27	180220	191076	15060.6	5864.92	13115.1	2.15102e+06	18211.2	5.28361e+06	3379.3	16570.1	265289	43220.7	1.61284e+07	2.03308e+07	1.22365e+06	598542	5003.22	10714.6	68253.8	12339.3	22721.2	104905	325.482	13950.7	7179.48	17527.4	13383.2	2038.47	35407.9	3010.98	820.427	2288.29	2654.21	93142.6
LP11_gV	gV	LP11	780843	1.37231e+06	83535.4	1.78466e+07	899323	1.2708e+06	1.03297e+06	316479	726894	667171	14192	48870	17527.4	72073.6	185911	24654.2	19707.1	22189.3	2.33132e+06	12900.7	8.89559e+06	5125.66	8999.3	253316	32384.6	3.3532e+07	3.93201e+07	16815.5	504132	2119	7554.52	81887	15885.7	11172	54519.7	551.961	20406.3	23156.6	86912.6	37088.4	84.1702	52371.3	2288.29	8512.76	5707.48	12128.7	102459
LP12_gA	gA	LP12	1.15571e+06	949924	98915.3	29945625	198672	1.6386e+06	289777	493632	62345.6	57285.2	21340.1	10930.8	9224.34	134805	283792	11695	8999.3	1138.08	2.41896e+06	20406.3	6.89816e+06	7179.48	9890.16	260010	37902	8.89559e+06	1.4416e+07	1.3241e+06	441968	3772.33	10115.7	66382.4	19376	15885.7	94993.8	110.732	10316.5	7010.83	17527.4	32384.6	1301.47	65059.3	3132.37	630.331	7936.29	1419.11	137475
LP12_pV	pV	LP12	1.00596e+06	1.2708e+06	94993.8	29945625	296010	763685	283792	516620	113792	145796	14192	10115.7	7010.83	162356	229148	11454.2	1035.63	8774.7	2236725	13691.5	6.89816e+06	5125.66	9696.26	260010	27042.8	1.3703e+07	18849750	1.13338e+06	394501	3901.64	9890.16	129336	17163.6	10526.1	83535.4	1091.96	13115.1	3516.06	20834.2	19376	2038.47	70636.7	930.177	771.549	2833.18	8156.84	124807
LP12_gV	gV	LP12	711897	1.06203e+06	81887	5.60324e+07	272862	185911	385034	681694	862363	1.41811e+06	11695	9224.34	17870.7	104905	191076	43220.7	9890.16	68253.8	2.41896e+06	19376	6166550	4477.12	37088.4	473251	49803.9	18849750	2.17423e+07	667171	309543	12128.7	4606.5	129336	20114.1	8774.7	44145.3	983.125	84.1702	1811.45	30046	21340.1	1091.96	11454.2	387.045	2471.45	7010.83	5392.76	23156.6
LP13_gA	gA	LP13	711897	1.13338e+06	66382.4	5.60324e+07	350915	206999	528931	696959	899323	1.2708e+06	10115.7	16815.5	24161.2	91026	124807	52371.3	7936.29	86912.6	2.58208e+06	18211.2	5.80189e+06	5707.48	33168	367137	73626.5	2.39813e+07	2.68924e+07	726894	309543	9224.34	4477.12	93142.6	15885.7	15060.6	69379.9	325.482	28745.4	6176.58	40598.5	20834.2	2833.18	38864	879.359	3516.06	13691.5	2654.21	22721.2
LP13_gV	gV	LP13	1.37231e+06	844330	72073.6	1.52232e+07	100678	559764	169710	413187	484181	528931	12595.3	5998.41	10115.7	93142.6	185911	18631.2	3901.64	24161.2	2.67906e+06	9224.34	7.71092e+06	6856.94	15306.8	394501	33168	8.34226e+06	1.05039e+07	726894	638968	7936.29	7713.26	83535.4	22189.3	13950.7	54519.7	1484.51	31899	4606.5	7179.48	21775.3	289.582	48870	1138.08	3253.67	589.006	1247.92	4013.7
LP14_gA	gA	LP14	1.37231e+06	726894	76883.9	1.52232e+07	185911	559764	247960	516620	44923.2	49803.9	23156.6	5125.66	10316.5	165985	194874	8512.76	1484.51	5239.34	2.67906e+06	17163.6	6.89816e+06	6660.27	20114.1	358809	53579.9	1.22832e+07	1.4416e+07	1.09387e+06	377399	9224.34	5003.22	69379.9	24654.2	22721.2	70636.7	224.045	3901.64	1609.45	16201	63703.3	1138.08	39845.1	3132.37	1247.92	11454.2	5707.48	148278
LP14_pV	pV	LP14	504132	862363	73626.5	1.05039e+07	559764	53579.9	598542	309543	145796	86912.6	15587	29370.9	23682	42163.5	104905	16570.1	25222.9	19001.5	1.57114e+06	24654.2	1.52232e+07	3516.06	9890.16	148278	3132.37	1.78466e+07	2.39813e+07	72073.6	822361	8774.7	10115.7	235653	22721.2	18211.2	13691.5	6176.58	61193	387.045	33168	3901.64	387.045	387.045	387.045	4606.5	387.045	1887.02	387.045
LP14_gV	gV	LP14	1.41811e+06	484181	61193	3.3532e+07	218445	745189	260010	862363	1.00596e+06	65059.3	11896.1	8512.76	8774.7	638968	223650	12900.7	8999.3	5539.16	2.41896e+06	9504.01	7.71092e+06	2833.18	9696.26	322158	28745.4	9.823e+06	1.4416e+07	1.5162e+06	385034	3901.64	5003.22	110030	16570.1	14192	140751	192.005	13115.1	5392.76	11695	20834.2	930.177	19376	1301.47	2119	1753.69	771.549	176523
LP15_gA	gA	LP15	1.37231e+06	432503	68253.8	3.3532e+07	104905	800808	198672	844330	91026	80300.7	15885.7	4477.12	7713.26	745189	206999	17163.6	4013.7	3901.64	2.5061e+06	11896.1	7.71092e+06	2654.21	11172	343731	41435.9	1.1533e+07	1.30592e+07	1776350	336028	7378.26	6322.51	86912.6	18211.2	14511.5	176523	589.006	13950.7	1189.79	1138.08	30557.9	1301.47	20114.1	1811.45	1609.45	5239.34	417.101	203259
LP15_gV	gV	LP15	516620	844330	42163.5	2.39813e+07	745189	72073.6	571270	394501	432503	493632	8999.3	35407.9	18631.2	23682	143155	20406.3	11896.1	32384.6	1.2708e+06	13383.2	1.52232e+07	2370.79	12128.7	176523	6499.97	18849750	2.17423e+07	316479	780843	11454.2	9696.26	191076	15060.6	5239.34	23156.6	4735.82	73626.5	7554.52	45958.9	930.177	162.322	162.322	162.322	6856.94	1301.47	820.427	162.322
LP16_gA	gA	LP16	583710	1.92916e+06	45958.9	1.78466e+07	2.15102e+06	8304	1.5162e+06	358809	1.03297e+06	876733	4317.9	96927.8	28127.8	31899	91026	40598.5	60025.5	218445	1.2708e+06	20834.2	1.05039e+07	5539.16	9890.16	162356	1811.45	3.3532e+07	4.36427e+07	84990.5	979210	4477.12	17163.6	173062	13383.2	7378.26	177.163	2038.47	62345.6	10115.7	143155	1753.69	1035.63	4884.06	630.331	6322.51	19001.5	15885.7	177.163
LP16_pV	pV	LP16	1.22365e+06	1.17805e+06	98915.3	29945625	198672	413187	296010	696959	75211	46936.7	13950.7	5539.16	6660.27	110030	212895	15885.7	2743.42	2654.21	2.67906e+06	25831.8	5.47164e+06	5864.92	19376	484181	44145.3	1.22832e+07	1.4416e+07	473251	667171	8999.3	15306.8	73626.5	21775.3	10115.7	80300.7	930.177	32384.6	5125.66	12900.7	54519.7	1753.69	45958.9	3010.98	3625.91	14192	723.206	81887
LP16_gV	gV	LP16	413187	1.46353e+06	26415.7	1.78466e+07	1.41811e+06	206999	1.57114e+06	528931	2.67906e+06	2236725	6322.51	73626.5	20406.3	72073.6	155202	28127.8	33811.5	80300.7	2.5061e+06	8304	6.57697e+06	6660.27	13950.7	484181	25831.8	3.64928e+07	4.81019e+07	1035.63	598542	4477.12	11695	120032	14511.5	5998.41	51195.8	1301.47	43220.7	33168	124807	23682	1678.71	37088.4	1091.96	12900.7	6499.97	48870	23156.6
LP17_pV	pV	LP17	1.37231e+06	1.41811e+06	104905	1.22832e+07	583710	451065	1.69769e+06	613933	322158	148278	15587	18631.2	9696.26	185911	212895	11454.2	13383.2	17870.7	2.15102e+06	10930.8	4.40813e+06	3010.98	6176.58	229148	21340.1	2.39813e+07	2.68924e+07	921444	667171	1974.19	6322.51	117151	8774.7	7179.48	108038	1091.96	38864	12595.3	24161.2	40598.5	551.961	27042.8	1357.87	10115.7	5125.66	3132.37	44145.3
LP17_gV	gV	LP17	1.6386e+06	1.13338e+06	110030	1.78466e+07	137475	583710	151915	696959	62345.6	96927.8	19376	2471.45	4477.12	404254	265289	10115.7	6856.94	7010.83	2.33132e+06	12339.3	4.11681e+06	8774.7	8304	283792	39845.1	9.823e+06	1.05039e+07	921444	504132	3010.98	8512.76	100678	11172	13115.1	145796	192.005	13383.2	4884.06	2210.46	29370.9	1035.63	45958.9	2119	9696.26	2915.88	630.331	76883.9
LP18_gA	gA	LP18	1.2708e+06	1.41811e+06	112053	1.05039e+07	745189	385034	726894	627998	198672	180220	14192	24654.2	9696.26	173062	212895	14807.9	12900.7	12595.3	2.0316e+06	10714.6	4.70572e+06	2743.42	5707.48	260010	24161.2	2.17423e+07	3.3532e+07	844330	462368	2471.45	6856.94	126910	8774.7	4317.9	96927.8	820.427	45958.9	14511.5	34669.5	27042.8	551.961	27685.4	1887.02	8999.3	4735.82	9504.01	47946.5
LP18_pV	pV	LP18	1.3241e+06	862363	100678	3.93201e+07	126910	544988	132499	780843	1.41811e+06	876733	9890.16	930.177	5707.48	473251	283792	20114.1	45958.9	30046	1776350	9696.26	5.28361e+06	10316.5	13383.2	336028	25831.8	6.89816e+06	9.823e+06	289777	711897	1887.02	33811.5	81887	14807.9	7936.29	70636.7	5539.16	13691.5	387.045	589.006	8999.3	2210.46	84990.5	2833.18	2038.47	2370.79	74.423	122068
LP18_gV	gV	LP18	1.22365e+06	899323	148278	4.36427e+07	48870	598542	104905	763685	38864	27042.8	11454.2	2915.88	7713.26	377399	350915	16570.1	41435.9	4884.06	2236725	12339.3	5.07597e+06	30046	11896.1	394501	34669.5	7.71092e+06	8.34226e+06	876733	484181	3516.06	44923.2	102459	15885.7	20406.3	122068	3901.64	13950.7	1138.08	192.005	33811.5	1247.92	78264.8	723.206	22.154	5392.76	417.101	70636.7
LP19_gA	gA	LP19	1.06203e+06	1.6386e+06	27042.8	3.64928e+07	1.92916e+06	394501	1.22365e+06	667171	1.00596e+06	598542	15587	102459	20406.3	134805	229148	29370.9	66382.4	15885.7	2.15102e+06	6660.27	5.07597e+06	4606.5	16570.1	316479	25831.8	2.68924e+07	4.36427e+07	921444	462368	7179.48	24654.2	247960	11695	8999.3	94993.8	3010.98	18211.2	61193	162356	15060.6	723.206	51195.8	1247.92	12595.3	2038.47	38864	33811.5
LP19_gV	gV	LP19	1.22365e+06	1.3241e+06	86912.6	5.60324e+07	83535.4	544988	73626.5	681694	32384.6	5239.34	19707.1	1678.71	4735.82	350915	301467	14807.9	44923.2	5864.92	2.41896e+06	12595.3	4.70572e+06	10115.7	22721.2	358809	37902	4.86127e+06	6.89816e+06	1.17805e+06	473251	8512.76	36223	173062	19001.5	18631.2	203259	879.359	10930.8	2210.46	2288.29	11896.1	1609.45	70636.7	1484.51	132.819	132.819	460.923	45958.9
LP20_gA	gA	LP20	1.3241e+06	1.5162e+06	52371.3	4.36427e+07	979210	516620	1.03297e+06	462368	598542	473251	13383.2	57285.2	12900.7	377399	253316	20834.2	80300.7	10526.1	2.33132e+06	5707.48	5.07597e+06	5998.41	13950.7	322158	20114.1	29945625	3.64928e+07	1.17805e+06	451065	5125.66	22189.3	151915	11695	14511.5	162356	132.819	9890.16	91026	73626.5	37902	930.177	51195.8	2568.39	10115.7	2743.42	21775.3	33168
LP20_pV	pV	LP20	1.5162e+06	2.15102e+06	69379.9	29945625	726894	745189	1.09387e+06	385034	1.37231e+06	651302	5539.16	47946.5	16815.5	432503	289777	23156.6	75211	60025.5	2.0316e+06	6499.97	1.05039e+07	5003.22	7936.29	296010	30557.9	2.68924e+07	3.93201e+07	571270	229148	2288.29	6856.94	76883.9	7554.52	10526.1	283792	1974.19	5998.41	58705.1	62345.6	37088.4	723.206	41435.9	1549.18	11896.1	2471.45	17163.6	53579.9
LP20_gV	gV	LP20	1.69769e+06	1776350	122068	4.36427e+07	143155	949924	253316	711897	260010	51195.8	6176.58	20114.1	13950.7	651302	316479	18631.2	25222.9	8156.84	2.33132e+06	9224.34	7.71092e+06	8512.76	7179.48	336028	27685.4	9.823e+06	1.22832e+07	696959	203259	4735.82	15060.6	58705.1	11896.1	19001.5	329137	64.6758	1138.08	5239.34	4159.09	57285.2	1484.51	53579.9	2654.21	551.961	4606.5	502.101	93142.6
LP21_gA	gA	LP21	1.6386e+06	1.84621e+06	126910	4.36427e+07	309543	921444	432503	667171	117151	43220.7	7179.48	22189.3	8999.3	544988	289777	28127.8	62345.6	4884.06	2236725	9890.16	1.05039e+07	9224.34	11172	350915	40598.5	1.78466e+07	2.17423e+07	745189	242742	2471.45	12595.3	75211	11896.1	12900.7	301467	2288.29	2210.46	10526.1	31202.6	61193	1091.96	66382.4	1974.19	3010.98	5003.22	8512.76	77574.4
LP21_pV	pV	LP21	441968	2.33132e+06	8774.7	3.3532e+07	1.6386e+06	180220	1.84621e+06	484181	1.57114e+06	899323	5125.66	91026	31202.6	15885.7	159186	28127.8	58705.1	110030	1.46353e+06	10930.8	1.30592e+07	1753.69	8304	169710	17870.7	2.68924e+07	4.36427e+07	462368	822361	3132.37	7378.26	504132	9890.16	121.775	49803.9	2568.39	113792	165985	134805	2915.88	121.775	121.775	1247.92	16815.5	1887.02	11454.2	121.775
LP21_gV	gV	LP21	949924	1.5162e+06	66382.4	5.60324e+07	206999	544988	516620	822361	336028	283792	7713.26	18631.2	11695	329137	185911	19707.1	39845.1	4884.06	2.85404e+06	16570.1	8.89559e+06	4013.7	10115.7	322158	28745.4	1.52232e+07	2.17423e+07	1.2708e+06	613933	3901.64	9890.16	124807	10316.5	15885.7	173062	1974.19	10714.6	12128.7	21340.1	22189.3	357.933	42163.5	1887.02	1753.69	2743.42	5239.34	65059.3
[truncated: 27 more columns]

## Sheet: Cohort 2
1785 significantly differential proteins between normal brain tissues and glioma tissues
Uniprot ID	Gene Name	P value	FDR	FC	Significant
P35555	FBN1	0.0176923	0.0386999	125.585	Up
P50454	SERPINH1	0.000683761	0.00347744	71.9547	Up
Q15582	TGFBI	0.00273504	0.00889978	71.165	Up
P19971	TYMP	0.00478633	0.0135902	52.8759	Up
P26022	PTX3	0.000683761	0.00347744	52.1146	Up
P09486	SPARC	0.000683761	0.00347744	48.149	Up
P07942	LAMB1	0.0157265	0.0350038	43.6534	Up
P12110	COL6A2	0.0211966	0.044588	41.2371	Up
Q99715	COL12A1	0.000683761	0.00347744	40.6122	Up
Q14315	FLNC	0.00136752	0.00521075	37.2757	Up
P48681	NES	0.000683761	0.00347744	30.8647	Up
P11802	CDK4	0.000683761	0.00347744	29.1755	Up
P32455	GBP1	0.000683761	0.00347744	28.8057	Up
P12111	COL6A3	0.0157265	0.0350038	28.7846	Up
Q9NZM1	MYOF	0.000683761	0.00347744	27.9028	Up
P78330	PSPH	0.00273504	0.00889978	25.5166	Up
P21810	BGN	0.0211966	0.044588	25.1781	Up
Q96AY3	FKBP10	0.00273504	0.00889978	25.1474	Up
P02461	COL3A1	0.00173913	0.00639334	24.3664	Up
P26599	PTBP1	0.000683761	0.00347744	21.6168	Up
P16401	H1-5	0.00136752	0.00521075	20.4744	Up
P24821	TNC	0.00273504	0.00889978	19.1569	Up
Q8WX93	PALLD	0.00478633	0.0135902	18.5484	Up
P26006	ITGA3	0.00307692	0.00987247	17.9542	Up
P13674	P4HA1	0.00273504	0.00889978	17.7299	Up
O95302	FKBP9	0.00197628	0.00713831	17.6026	Up
Q16363	LAMA4	0.00752137	0.019435	17.5479	Up
Q13451	FKBP5	0.0227273	0.0472938	17.3724	Up
P16070	CD44	0.000683761	0.00347744	16.7449	Up
Q16527	CSRP2	0.000683761	0.00347744	15.6077	Up
A6NIH7	UNC119B	0.000869565	0.00395717	15.5165	Up
Q03518	TAP1	0.000683761	0.00347744	15.3905	Up
Q9Y6K5	OAS3	0.00136752	0.00521075	15.0201	Up
P08670	VIM	0.00273504	0.00889978	14.7632	Up
P12109	COL6A1	0.00478633	0.0135902	14.5246	Up
Q01995	TAGLN	0.00752137	0.019435	14.4577	Up
P04083	ANXA1	0.0211966	0.044588	14.3897	Up
P50479	PDLIM4	0.0227273	0.0472938	14.1795	Up
O00461	GOLIM4	0.000683761	0.00347744	13.97	Up
P05204	HMGN2	0.000683761	0.00347744	13.8123	Up
Q9UBG0	MRC2	0.00752137	0.019435	13.3027	Up
Q4KMQ2	ANO6	0.000683761	0.00347744	12.9845	Up
Q9Y6N5	SQOR	0.0238461	0.0491493	12.9343	Up
P31949	S100A11	0.000683761	0.00347744	12.3169	Up
Q9NTI5	PDS5B	0.000683761	0.00347744	12.2401	Up
Q9Y3Z3	SAMHD1	0.000683761	0.00347744	12.0231	Up
P61916	NPC2	0.000683761	0.00347744	11.768	Up
P46063	RECQL	0.000683761	0.00347744	11.7563	Up
P49321	NASP	0.00273504	0.00889978	11.733	Up
P13796	LCP1	0.00273504	0.00889978	11.441	Up
Q9H3U1	UNC45A	0.00478633	0.0135902	11.4205	Up
Q16666	IFI16	0.00273504	0.00889978	11.398	Up
P05114	HMGN1	0.000683761	0.00347744	11.3158	Up
P78347	GTF2I	0.000683761	0.00347744	11.298	Up
O00299	CLIC1	0.00752137	0.019435	11.116	Up
P06737	PYGL	0.00136752	0.00521075	10.9422	Up
P27708	CAD	0.000683761	0.00347744	10.9058	Up
P05107	ITGB2	0.00752137	0.019435	10.8499	Up
Q9NXV6	CDKN2AIP	0.000769231	0.00364963	10.7247	Up
P17480	UBTF	0.000683761	0.00347744	10.5478	Up
Q9UDR5	AASS	0.00478633	0.0135902	10.4548	Up
P09914	IFIT1	0.0109402	0.0259362	10.3657	Up
O60264	SMARCA5	0.000683761	0.00347744	10.199	Up
P23378	GLDC	0.00752137	0.019435	10.175	Up
P35221	CTNNA1	0.000683761	0.00347744	9.80597	Up
P46940	IQGAP1	0.000683761	0.00347744	9.70433	Up
O15061	SYNM	0.00752137	0.019435	9.59829	Up
P20700	LMNB1	0.000683761	0.00347744	9.55877	Up
P17301	ITGA2	0.00478633	0.0135902	9.52357	Up
P02792	FTL	0.0211966	0.044588	9.19528	Up
Q9BTT0	ANP32E	0.000683761	0.00347744	9.17478	Up
P10321	HLA-C	0.00136752	0.00521075	9.09929	Up
Q9UHB6	LIMA1	0.000683761	0.00347744	9.034	Up
Q9NQG5	RPRD1B	0.000683761	0.00347744	8.83402	Up
Q92820	GGH	0.000683761	0.00347744	8.72987	Up
P28062	PSMB8	0.000683761	0.00347744	8.67392	Up
Q9P258	RCC2	0.000683761	0.00347744	8.43746	Up
P26583	HMGB2	0.00136752	0.00521075	8.38633	Up
P14317	HCLS1	0.0109402	0.0259362	8.367	Up
Q8NBJ7	SUMF2	0.00478633	0.0135902	8.35108	Up
Q9H488	POFUT1	0.000683761	0.00347744	8.13925	Up
Q8IVM0	CCDC50	0.000769231	0.00364963	8.11881	Up
Q9BTV4	TMEM43	0.000683761	0.00347744	8.09009	Up
Q92878	RAD50	0.000683761	0.00347744	7.97999	Up
P28065	PSMB9	0.000683761	0.00347744	7.95719	Up
Q86V81	ALYREF	0.000683761	0.00347744	7.93553	Up
Q15437	SEC23B	0.000683761	0.00347744	7.76179	Up
P06703	S100A6	0.00273504	0.00889978	7.7483	Up
P37802	TAGLN2	0.00752137	0.019435	7.74362	Up
P67809	YBX1	0.000683761	0.00347744	7.70302	Up
Q96I24	FUBP3	0.000683761	0.00347744	7.59031	Up
P18031	PTPN1	0.00136752	0.00521075	7.55639	Up
P43490	NAMPT	0.00478633	0.0135902	7.53626	Up
Q14739	LBR	0.000683761	0.00347744	7.25748	Up
Q12874	SF3A3	0.00136752	0.00521075	7.22383	Up
Q53FA7	TP53I3	0.000683761	0.00347744	7.20635	Up
P14136	GFAP	0.000683761	0.00347744	7.18717	Up
P13667	PDIA4	0.000683761	0.00347744	7.09785	Up
Q9UQE7	SMC3	0.000683761	0.00347744	7.00338	Up
Q9NXG2	THUMPD1	0.000683761	0.00347744	6.92181	Up
Q16563	SYPL1	0.000869565	0.00395717	6.90904	Up
P32321	DCTD	0.00956522	0.0236844	6.8377	Up
P51532	SMARCA4	0.000683761	0.00347744	6.81278	Up
P01889	HLA-B	0.000683761	0.00347744	6.80378	Up
P22105	TNXB	0.0109402	0.0259362	6.71287	Up
Q6PCB0	VWA1	0.0157265	0.0350038	6.56375	Up
P50135	HNMT	0.000683761	0.00347744	6.56044	Up
P62316	SNRPD2	0.00136752	0.00521075	6.55253	Up
Q96RT7	TUBGCP6	0.00307692	0.00987247	6.55192	Up
P52597	HNRNPF	0.000683761	0.00347744	6.54665	Up
P04439	HLA-A	0.000683761	0.00347744	6.54632	Up
P27695	APEX1	0.000683761	0.00347744	6.54401	Up
Q9UHJ6	SHPK	0.00538461	0.0149428	6.51095	Up
Q06210	GFPT1	0.00136752	0.00521075	6.48458	Up
Q9Y696	CLIC4	0.000683761	0.00347744	6.48062	Up
P27694	RPA1	0.000683761	0.00347744	6.46451	Up
O15540	FABP7	0.0109402	0.0259362	6.45606	Up
O15143	ARPC1B	0.00273504	0.00889978	6.44844	Up
Q14160	SCRIB	0.000683761	0.00347744	6.42763	Up
P45973	CBX5	1.21353e-07	2.39253e-05	6.42507	Up
P42785	PRCP	0.000683761	0.00347744	6.41927	Up
Q96N67	DOCK7	0.00752137	0.019435	6.41534	Up
Q9NX05	FAM120C	0.00136752	0.00521075	6.30333	Up
Q8TD19	NEK9	0.000683761	0.00347744	6.29916	Up
O14776	TCERG1	0.000683761	0.00347744	6.24681	Up
Q9UMR2	DDX19B	0.000988142	0.00436707	6.24618	Up
O95232	LUC7L3	0.000683761	0.00347744	6.18525	Up
O00267	SUPT5H	3.2057e-06	0.000206796	6.15277	Up
O14879	IFIT3	0.00478633	0.0135902	6.08751	Up
Q08945	SSRP1	0.00273504	0.00889978	6.07526	Up
P04839	CYBB	0.0109402	0.0259362	6.06685	Up
Q03164	KMT2A	0.0211966	0.044588	6.04001	Up
P21333	FLNA	0.00136752	0.00521075	6.02584	Up
Q96RF0	SNX18	0.000683761	0.00347744	6.00294	Up
P61769	B2M	0.000683761	0.00347744	5.94283	Up
Q9BV57	ADI1	0.00307692	0.00987247	5.94119	Up
P46977	STT3A	0.000683761	0.00347744	5.93655	Up
P29590	PML	0.000683761	0.00347744	5.92041	Up
Q9Y383	LUC7L2	0.000683761	0.00347744	5.91757	Up
Q9H223	EHD4	0.00478633	0.0135902	5.89825	Up
P11387	TOP1	0.00478633	0.0135902	5.8908	Up
Q8IZL8	PELP1	0.00752137	0.019435	5.88552	Up
Q08345	DDR1	0.00478633	0.0135902	5.84136	Up
Q9BQA9	CYBC1	0.000683761	0.00347744	5.82282	Up
Q2TAY7	SMU1	0.00136752	0.00521075	5.73971	Up
Q05682	CALD1	0.000683761	0.00347744	5.71098	Up
Q9BXW7	HDHD5	0.000683761	0.00347744	5.70924	Up
P14209	CD99	0.00273504	0.00889978	5.69229	Up
Q08J23	NSUN2	0.00153846	0.00572563	5.67323	Up
Q7L014	DDX46	0.000683761	0.00347744	5.60464	Up
O15355	PPM1G	0.00136752	0.00521075	5.60144	Up
P49903	SEPHS1	0.00136752	0.00521075	5.60111	Up
Q14980	NUMA1	0.000683761	0.00347744	5.58503	Up
Q14683	SMC1A	0.000683761	0.00347744	5.58348	Up
O75369	FLNB	0.000683761	0.00347744	5.57065	Up
Q9NUV9	GIMAP4	0.00136752	0.00521075	5.55608	Up
Q14839	CHD4	0.000683761	0.00347744	5.55289	Up
Q08380	LGALS3BP	0.00273504	0.00889978	5.52312	Up
Q96PU8	QKI	0.000683761	0.00347744	5.50664	Up
Q9Y5B9	SUPT16H	0.00478633	0.0135902	5.43783	Up
Q05048	CSTF1	0.000683761	0.00347744	5.41807	Up
Q7L1Q6	BZW1	0.00136752	0.00521075	5.4148	Up
P57737	CORO7	0.00273504	0.00889978	5.40399	Up
P51610	HCFC1	0.00136752	0.00521075	5.3837	Up
P09668	CTSH	3.93359e-05	0.00123622	5.37899	Up
Q15417	CNN3	0.000683761	0.00347744	5.36964	Up
Q9P016	THYN1	0.000683761	0.00347744	5.36618	Up
Q92621	NUP205	0.000683761	0.00347744	5.32688	Up
Q5BKZ1	ZNF326	0.000683761	0.00347744	5.31141	Up
Q02880	TOP2B	0.00136752	0.00521075	5.27456	Up
Q92688	ANP32B	0.000683761	0.00347744	5.27091	Up
Q96DH6	MSI2	0.00136752	0.00521075	5.27039	Up
P51571	SSR4	0.00136752	0.00521075	5.26963	Up
Q9Y2X3	NOP58	2.57099e-06	0.000185363	5.25983	Up
P01019	AGT	0.000683761	0.00347744	5.24796	Up
Q7Z5L9	IRF2BP2	0.00136752	0.00521075	5.2154	Up
Q9NZ08	ERAP1	0.00136752	0.00521075	5.19872	Up
O75874	IDH1	0.000683761	0.00347744	5.18365	Up
Q16576	RBBP7	0.00136752	0.00521075	5.17898	Up
Q9Y5K6	CD2AP	0.00273504	0.00889978	5.1766	Up
P35658	NUP214	0.000683761	0.00347744	5.16456	Up
P02511	CRYAB	0.00273504	0.00889978	5.12774	Up
P10619	CTSA	7.95185e-06	0.000379727	5.11894	Up
P63172	DYNLT1	0.00136752	0.00521075	5.1147	Up
Q15165	PON2	0.00136752	0.00521075	5.09703	Up
P51570	GALK1	0.000683761	0.00347744	5.0924	Up
Q13643	FHL3	0.0176923	0.0386999	5.08936	Up
P35237	SERPINB6	0.00478633	0.0135902	5.08317	Up
Q12996	CSTF3	0.000683761	0.00347744	5.07076	Up
P49756	RBM25	0.000683761	0.00347744	5.05789	Up
P10155	RO60	8.76104e-07	0.000103268	5.04814	Up
P06312	IGKV4-1	0.0227273	0.0472938	5.04584	Up
P49354	FNTA	0.000683761	0.00347744	5.02124	Up
O95864	FADS2	0.00273504	0.00889978	5.01455	Up
P23193	TCEA1	3.01785e-07	4.62359e-05	5.01025	Up
P46937	YAP1	0.0176923	0.0386999	5.00563	Up
Q99729	HNRNPAB	0.00136752	0.00521075	4.97674	Up
P78527	PRKDC	2.65346e-08	7.50522e-06	4.96208	Up
Q6P2Q9	PRPF8	0.000683761	0.00347744	4.92031	Up
Q8WWY3	PRPF31	0.000683761	0.00347744	4.91742	Up
P10253	GAA	0.0109402	0.0259362	4.89446	Up
Q09161	NCBP1	0.000683761	0.00347744	4.89221	Up
Q13480	GAB1	0.00136752	0.00521075	4.88728	Up
Q7Z3B4	NUP54	0.000683761	0.00347744	4.87771	Up
O43660	PLRG1	0.000683761	0.00347744	4.86807	Up
Q9NTZ6	RBM12	0.00273504	0.00889978	4.86239	Up
Q13464	ROCK1	0.000683761	0.00347744	4.82929	Up
Q13330	MTA1	0.0157265	0.0350038	4.82073	Up
Q96E11	MRRF	0.00136752	0.00521075	4.82004	Up
Q92769	HDAC2	2.01089e-07	3.52098e-05	4.81136	Up
Q09028	RBBP4	0.000683761	0.00347744	4.80124	Up
Q8NBQ5	HSD17B11	0.0157265	0.0350038	4.79902	Up
Q96FN4	CPNE2	0.0109402	0.0259362	4.79759	Up
O43665	RGS10	0.00846154	0.0213396	4.79006	Up
Q14498	RBM39	0.00478633	0.0135902	4.78774	Up
Q9H307	PNN	0.00136752	0.00521075	4.78299	Up
Q13283	G3BP1	0.000683761	0.00347744	4.77519	Up
O43143	DHX15	0.000683761	0.00347744	4.7705	Up
P12955	PEPD	0.00136752	0.00521075	4.75521	Up
Q9HC35	EML4	0.000683761	0.00347744	4.73952	Up
Q03135	CAV1	0.0211966	0.044588	4.73715	Up
P08758	ANXA5	0.000683761	0.00347744	4.73498	Up
Q15428	SF3A2	0.000683761	0.00347744	4.71852	Up
Q14938	NFIX	0.0109402	0.0259362	4.71682	Up
O43252	PAPSS1	0.0109402	0.0259362	4.71141	Up
P62633	CNBP	1.01583e-05	0.000446237	4.70841	Up
Q9Y653	ADGRG1	0.00478633	0.0135902	4.69228	Up
P28838	LAP3	0.000683761	0.00347744	4.67559	Up
P46734	MAP2K3	0.0238461	0.0491493	4.66119	Up
Q96RT1	ERBIN	5.11879e-06	0.000289566	4.66005	Up
P63162	SNRPN	0.000683761	0.00347744	4.6098	Up
Q9UBR2	CTSZ	0.0238461	0.0491493	4.57717	Up
Q9UQ35	SRRM2	0.000683761	0.00347744	4.5654	Up
P05455	SSB	0.000683761	0.00347744	4.55768	Up
O15533	TAPBP	0.00136752	0.00521075	4.54905	Up
O75494	SRSF10	0.000683761	0.00347744	4.54894	Up
P39060	COL18A1	0.0211966	0.044588	4.54818	Up
Q15459	SF3A1	0.00615697	0.0167822	4.54664	Up
P22102	GART	1.9882e-09	1.21843e-06	4.54009	Up
O76094	SRP72	7.16189e-07	9.75343e-05	4.53604	Up
P09429	HMGB1	0.000683761	0.00347744	4.53143	Up
P16284	PECAM1	0.00790514	0.0201856	4.52407	Up
P49585	PCYT1A	0.000683761	0.00347744	4.49981	Up
P55263	ADK	0.000683761	0.00347744	4.48234	Up
Q92616	GCN1	0.000683761	0.00347744	4.48081	Up
Q9BY77	POLDIP3	0.00136752	0.00521075	4.47523	Up
Q9UKV3	ACIN1	2.17305e-08	7.50522e-06	4.47296	Up
O60443	GSDME	1.56308e-06	0.00015268	4.46104	Up
P49023	PXN	0.000683761	0.00347744	4.44674	Up
O00534	VWA5A	0.00478633	0.0135902	4.43763	Up
P18754	RCC1	0.000683761	0.00347744	4.41706	Up
P43246	MSH2	0.00136752	0.00521075	4.41358	Up
P0CG30	GSTT2B	0.0035398	0.011182	4.41137	Up
Q86SK9	SCD5	2.40755e-06	0.000185363	4.40813	Up
Q96S66	CLCC1	0.000683761	0.00347744	4.40471	Up
O00567	NOP56	0.000683761	0.00347744	4.39705	Up
Q96HC4	PDLIM5	0.00478633	0.0135902	4.39235	Up
Q8WUM0	NUP133	0.000683761	0.00347744	4.39087	Up
Q7Z4V5	HDGFL2	0.00478633	0.0135902	4.38752	Up
O75531	BANF1	0.000683761	0.00347744	4.38657	Up
Q9Y4P3	TBL2	0.00752137	0.019435	4.36417	Up
P30876	POLR2B	0.000683761	0.00347744	4.36294	Up
P50440	GATM	0.0109402	0.0259362	4.34725	Up
Q9BXP5	SRRT	0.000683761	0.00347744	4.33913	Up
Q8TD55	PLEKHO2	0.0176923	0.0386999	4.33786	Up
P14543	NID1	0.0211966	0.044588	4.33148	Up
P51153	RAB13	0.000683761	0.00347744	4.33016	Up
Q15029	EFTUD2	0.000683761	0.00347744	4.31687	Up
Q7Z2W4	ZC3HAV1	0.000683761	0.00347744	4.31178	Up
P11279	LAMP1	0.00538461	0.0149428	4.31063	Up
Q01105	SET	0.000683761	0.00347744	4.26712	Up
Q13263	TRIM28	0.000683761	0.00347744	4.2352	Up
Q5JTV8	TOR1AIP1	0.00478633	0.0135902	4.22974	Up
Q9UKM9	RALY	0.000683761	0.00347744	4.22834	Up
Q13510	ASAH1	0.00478633	0.0135902	4.21483	Up
Q71UI9	H2AZ2	0.000683761	0.00347744	4.21467	Up
Q9H0C8	ILKAP	0.000683761	0.00347744	4.20965	Up
Q9Y315	DERA	0.000683761	0.00347744	4.20501	Up
P51858	HDGF	4.09308e-06	0.000248995	4.19799	Up
Q13162	PRDX4	0.000683761	0.00347744	4.19693	Up
P36269	GGT5	0.00273504	0.00889978	4.1904	Up
P02753	RBP4	0.00752137	0.019435	4.18688	Up
O43395	PRPF3	0.000869565	0.00395717	4.18294	Up
Q9HB07	MYG1	0.000683761	0.00347744	4.17901	Up
Q8NBS9	TXNDC5	0.000683761	0.00347744	4.16205	Up
Q9Y4K3	TRAF6	0.000683761	0.00347744	4.13531	Up
Q9UHX1	PUF60	0.000683761	0.00347744	4.13084	Up
P13010	XRCC5	0.000683761	0.00347744	4.12752	Up
Q9HCD5	NCOA5	0.0185983	0.0403934	4.12616	Up
Q6SZW1	SARM1	0.00752137	0.019435	4.11701	Up
P35637	FUS	0.000683761	0.00347744	4.11697	Up
O43852	CALU	0.00273504	0.00889978	4.11113	Up
Q08623	PUDP	0.000935479	0.00422574	4.10563	Up
O75643	SNRNP200	0.000683761	0.00347744	4.09765	Up
P02746	C1QB	0.0157265	0.0350038	4.08897	Up
Q9UH99	SUN2	4.39683e-05	0.00135858	4.08807	Up
P40306	PSMB10	0.00273504	0.00889978	4.07948	Up
Q9NW64	RBM22	0.000769231	0.00364963	4.07532	Up
Q92522	H1-10	0.0157265	0.0350038	4.06037	Up
Q6DD88	ATL3	0.00478633	0.0135902	4.04985	Up
Q08170	SRSF4	0.00136752	0.00521075	4.04888	Up
O94906	PRPF6	3.96281e-08	9.71416e-06	4.03147	Up
P42224	STAT1	0.000683761	0.00347744	4.03008	Up
O95070	YIF1A	5.31657e-05	0.00156392	4.01836	Up
Q9BUJ2	HNRNPUL1	0.000683761	0.00347744	4.00799	Up
Q9UL46	PSME2	0.000683761	0.00347744	3.99412	Up
P23919	DTYMK	0.000683761	0.00347744	3.98559	Up
P07305	H1-0	0.00478633	0.0135902	3.98453	Up
P22087	FBL	0.000683761	0.00347744	3.97963	Up
Q9BRR6	ADPGK	0.000631426	0.00347744	3.97635	Up
P53007	SLC25A1	0.0211966	0.044588	3.97537	Up
Q04446	GBE1	0.00136752	0.00521075	3.96641	Up
Q8NCN5	PDPR	0.00478633	0.0135902	3.95783	Up
P12268	IMPDH2	0.000683761	0.00347744	3.94882	Up
Q1KMD3	HNRNPUL2	1.0638e-06	0.000108655	3.94246	Up
Q13185	CBX3	0.000683761	0.00347744	3.93728	Up
P21980	TGM2	0.0211966	0.044588	3.92849	Up
Q9UBF2	COPG2	0.00478633	0.0135902	3.92657	Up
Q9BQI0	AIF1L	0.00752137	0.019435	3.92443	Up
Q9UQ88	CDK11A	0.000683761	0.00347744	3.91701	Up
P34897	SHMT2	0.00752137	0.019435	3.89829	Up
Q8WZA0	LZIC	0.000683761	0.00347744	3.89632	Up
Q5VW32	BROX	0.000132375	0.00306784	3.89158	Up
P09874	PARP1	0.000683761	0.00347744	3.89108	Up
P61619	SEC61A1	0.00010129	0.00255097	3.88183	Up
Q13435	SF3B2	1.62013e-06	0.000152749	3.87092	Up
P52566	ARHGDIB	0.0157265	0.0350038	3.86584	Up
Q8TCT9	HM13	0.00790514	0.0201856	3.85434	Up
Q96T51	RUFY1	0.00273504	0.00889978	3.85098	Up
Q13123	IK	0.000683761	0.00347744	3.8487	Up
Q96I99	SUCLG2	0.000683761	0.00347744	3.84633	Up
O94888	UBXN7	0.000192392	0.00347744	3.84252	Up
O60664	PLIN3	0.00478633	0.0135902	3.83453	Up
Q86VM9	ZC3H18	0.00752137	0.019435	3.83373	Up
Q15020	SART3	0.00273504	0.00889978	3.81032	Up
P60842	EIF4A1	0.000683761	0.00347744	3.79851	Up
O75884	RBBP9	0.00538461	0.0149428	3.76883	Up
Q15942	ZYX	0.0109402	0.0259362	3.76809	Up
P04844	RPN2	0.000683761	0.00347744	3.76794	Up
Q14320	FAM50A	0.00608696	0.016616	3.76016	Up
Q96GA7	SDSL	0.0211966	0.044588	3.74888	Up
P12956	XRCC6	6.71052e-08	1.45145e-05	3.74476	Up
Q96D46	NMD3	2.28361e-05	0.000865655	3.74266	Up
Q12907	LMAN2	0.00136752	0.00521075	3.73755	Up
P82979	SARNP	0.00136752	0.00521075	3.73582	Up
Q15274	QPRT	9.05017e-05	0.00235187	3.72332	Up
O95394	PGM3	0.00040514	0.00347744	3.72241	Up
Q8IYD1	GSPT2	1.98175e-06	0.000165611	3.71583	Up
P49792	RANBP2	0.00273504	0.00889978	3.69781	Up
Q06323	PSME1	0.000683761	0.00347744	3.69755	Up
P41240	CSK	0.000683761	0.00347744	3.691	Up
Q6UXH1	CRELD2	0.00538461	0.0149428	3.68977	Up
Q13838	DDX39B	0.000159311	0.00338605	3.68725	Up
O75400	PRPF40A	0.00973859	0.0240489	3.67761	Up
Q9H6Z4	RANBP3	0.000683761	0.00347744	3.67642	Up
Q96T37	RBM15	0.00273504	0.00889978	3.67005	Up
P15924	DSP	0.00153846	0.00572563	3.66387	Up
P62308	SNRPG	0.00273504	0.00889978	3.66135	Up
P00491	PNP	0.00478633	0.0135902	3.66018	Up
P26368	U2AF2	0.00243576	0.00857061	3.65378	Up
Q9ULX6	AKAP8L	0.00136752	0.00521075	3.64533	Up
Q9UJS0	SLC25A13	0.000683761	0.00347744	3.6292	Up
Q96G03	PGM2	2.54164e-08	7.50522e-06	3.62834	Up
P80303	NUCB2	5.0675e-05	0.00152731	3.61282	Up
Q7L2H7	EIF3M	0.0123451	0.0289496	3.60089	Up
P50552	VASP	0.000200155	0.00347744	3.59782	Up
Q13523	PRPF4B	0.013913	0.0322858	3.59359	Up
P11172	UMPS	0.00122088	0.00521075	3.59286	Up
P04062	GBA1	0.00846154	0.0213396	3.59099	Up
P83916	CBX1	0.0109402	0.0259362	3.59011	Up
Q99536	VAT1	0.000683761	0.00347744	3.58256	Up
O15031	PLXNB2	0.000683761	0.00347744	3.57781	Up
P16930	FAH	0.00136752	0.00521075	3.5778	Up
P06132	UROD	0.000186919	0.00347744	3.57536	Up
Q12797	ASPH	0.000683761	0.00347744	3.56555	Up
P31943	HNRNPH1	0.000683761	0.00347744	3.56052	Up
Q9H2P0	ADNP	0.0109402	0.0259362	3.55461	Up
P19387	POLR2C	0.000683761	0.00347744	3.54125	Up
Q07065	CKAP4	0.00136752	0.00521075	3.51862	Up
P05388	RPLP0	1.23628e-07	2.39253e-05	3.50884	Up
O00584	RNASET2	0.000683761	0.00347744	3.49663	Up
Q96DI7	SNRNP40	0.000683761	0.00347744	3.49643	Up
O00161	SNAP23	0.000683761	0.00347744	3.47983	Up
Q14151	SAFB2	0.00478633	0.0135902	3.47743	Up
Q9UL18	AGO1	0.000683761	0.00347744	3.47081	Up
Q15293	RCN1	0.00136752	0.00521075	3.46923	Up
Q9BWF3	RBM4	0.00136752	0.00521075	3.46564	Up
P06454	PTMA	0.00273504	0.00889978	3.45698	Up
P21964	COMT	0.000683761	0.00347744	3.45572	Up
P52272	HNRNPM	0.000683761	0.00347744	3.44461	Up
Q15717	ELAVL1	3.82787e-05	0.00121337	3.44334	Up
Q9Y3A5	SBDS	0.000683761	0.00347744	3.43776	Up
O95470	SGPL1	0.0109402	0.0259362	3.43729	Up
Q15637	SF1	0.000683761	0.00347744	3.41316	Up
Q9BUF5	TUBB6	0.00732304	0.019435	3.39927	Up
Q9P0V9	SEPTIN10	0.000683761	0.00347744	3.39889	Up
P38919	EIF4A3	0.000683761	0.00347744	3.39593	Up
P62888	RPL30	0.000683761	0.00347744	3.39571	Up
O60841	EIF5B	0.000683761	0.00347744	3.39277	Up
P55854	SUMO3	0.00538461	0.0149428	3.38641	Up
Q9BZZ5	API5	0.000683761	0.00347744	3.38519	Up
Q9H4A4	RNPEP	0.000683761	0.00347744	3.38406	Up
P42167	TMPO	0.00478633	0.0135902	3.37718	Up
Q9NSC5	HOMER3	0.00538461	0.0149428	3.3753	Up
O14545	TRAFD1	2.53415e-05	0.000922582	3.37305	Up
P62807	H2BC10	0.000395343	0.00347744	3.3691	Up
O15269	SPTLC1	0.00478633	0.0135902	3.36528	Up
P55957	BID	0.00458644	0.0135902	3.34834	Up
Q9C0B1	FTO	0.000126545	0.00298274	3.3477	Up
P40763	STAT3	5.86994e-10	5.39594e-07	3.34577	Up
Q15393	SF3B3	0.000683761	0.00347744	3.34339	Up
P05556	ITGB1	0.000683761	0.00347744	3.33912	Up
P67812	SEC11A	0.0211966	0.044588	3.33827	Up
P37198	NUP62	0.00383957	0.0120256	3.33793	Up
Q96IU4	ABHD14B	0.000683761	0.00347744	3.32655	Up
P61326	MAGOH	6.8884e-06	0.000351787	3.31275	Up
Q96PK6	RBM14	0.000683761	0.00347744	3.31183	Up
P18887	XRCC1	0.000769231	0.00364963	3.3069	Up
P61956	SUMO2	1.02008e-06	0.000108593	3.30612	Up
Q9NXC5	MIOS	0.000683761	0.00347744	3.29072	Up
Q9UBT2	UBA2	0.00273504	0.00889978	3.27619	Up
P54819	AK2	0.000683761	0.00347744	3.27091	Up
Q15233	NONO	0.000683761	0.00347744	3.26822	Up
P35241	RDX	0.000683761	0.00347744	3.26127	Up
Q7L9L4	MOB1B	2.91035e-05	0.00100956	3.25382	Up
Q09666	AHNAK	0.00752137	0.019435	3.25177	Up
P27816	MAP4	0.000683761	0.00347744	3.2417	Up
P07858	CTSB	0.0157265	0.0350038	3.24162	Up
O60762	DPM1	0.0157265	0.0350038	3.24096	Up
P41223	BUD31	0.00478633	0.0135902	3.24075	Up
Q15052	ARHGEF6	0.000683761	0.00347744	3.22682	Up
P49750	YLPM1	0.0157265	0.0350038	3.22544	Up
Q13151	HNRNPA0	0.00752137	0.019435	3.22383	Up
Q12888	TP53BP1	0.00273504	0.00889978	3.21311	Up
P12270	TPR	0.000683761	0.00347744	3.19811	Up
Q8TCU6	PREX1	0.00538461	0.0149428	3.18161	Up
P08708	RPS17	0.00136752	0.00521075	3.18009	Up
Q8WTS6	SETD7	0.00136752	0.00521075	3.17397	Up
P02545	LMNA	0.00478633	0.0135902	3.16398	Up
Q8NC56	LEMD2	0.00186579	0.00676578	3.16314	Up
Q9BV20	MRI1	0.000683761	0.00347744	3.15706	Up
Q00839	HNRNPU	2.44425e-07	4.08523e-05	3.14327	Up
Q8NE71	ABCF1	5.75111e-05	0.0016521	3.13435	Up
O75828	CBR3	0.000683761	0.00347744	3.13232	Up
O15484	CAPN5	0.00273504	0.00889978	3.12644	Up
Q9BY32	ITPA	1.57787e-06	0.00015268	3.12431	Up
Q9Y5S9	RBM8A	0.000683761	0.00347744	3.12275	Up
O00203	AP3B1	0.000683761	0.00347744	3.12247	Up
P49790	NUP153	0.00113328	0.00485109	3.11904	Up
P38159	RBMX	0.00642336	0.0174308	3.11763	Up
P39687	ANP32A	0.000622067	0.00347744	3.11444	Up
P13797	PLS3	0.0109402	0.0259362	3.10498	Up
Q8TD16	BICD2	0.000106716	0.00263872	3.10105	Up
P09651	HNRNPA1	2.88155e-05	0.00100909	3.09841	Up
Q96I15	SCLY	0.0238461	0.0491493	3.08674	Up
P46782	RPS5	0.000683761	0.00347744	3.07585	Up
P61011	SRP54	6.221e-06	0.000331516	3.06639	Up
P18621	RPL17	0.00801218	0.0204163	3.06506	Up
P62266	RPS23	0.00136752	0.00521075	3.06408	Up
O43592	XPOT	0.00792922	0.020233	3.06089	Up
Q93052	LPP	5.25517e-05	0.00155833	3.04948	Up
Q9NQT8	KIF13B	0.00478633	0.0135902	3.04834	Up
O75368	SH3BGRL	0.00904207	0.0225714	3.04818	Up
P68104	EEF1A1	5.93805e-06	0.000321091	3.03931	Up
P17655	CAPN2	0.00478633	0.0135902	3.03658	Up
Q12792	TWF1	0.000683761	0.00347744	3.03364	Up
Q13724	MOGS	0.00273504	0.00889978	3.03056	Up
Q13043	STK4	0.00156131	0.00579894	3.02589	Up
P62277	RPS13	0.00273504	0.00889978	3.02327	Up
Q16822	PCK2	0.0238461	0.0491493	3.02191	Up
Q6ZPD9	DPY19L3	0.0123077	0.0288803	3.02091	Up
P07237	P4HB	0.00478633	0.0135902	3.02027	Up
Q14258	TRIM25	0.000683761	0.00347744	3.01972	Up
O95881	TXNDC12	1.06718e-05	0.000456282	3.01787	Up
P07741	APRT	0.000683761	0.00347744	3.01677	Up
Q13418	ILK	0.000415045	0.00347744	3.01451	Up
P08134	RHOC	0.00420409	0.0129952	3.01322	Up
Q15738	NSDHL	0.000683761	0.00347744	3.01197	Up
O15042	U2SURP	0.00136752	0.00521075	3.01127	Up
P30566	ADSL	0.00860793	0.0216494	3.01124	Up
P49257	LMAN1	3.78005e-05	0.00120863	3.01065	Up
Q9H5N1	RABEP2	0.00916341	0.0228124	3.00628	Up
P09012	SNRPA	0.00478633	0.0135902	2.99506	Up
Q96AQ6	PBXIP1	0.0109402	0.0259362	2.99334	Up
P19338	NCL	0.000683761	0.00347744	2.98999	Up
Q9UMS4	PRPF19	0.000683761	0.00347744	2.98796	Up
P28799	GRN	0.00752137	0.019435	2.98442	Up
O75934	BCAS2	0.00478633	0.0135902	2.97641	Up
P0C0L5	C4B	0.0211966	0.044588	2.97575	Up
P53367	ARFIP1	0.0157265	0.0350038	2.97279	Up
Q8TAQ2	SMARCC2	3.35319e-05	0.00112088	2.97258	Up
O95793	STAU1	0.0157265	0.0350038	2.97159	Up
P61978	HNRNPK	0.000683761	0.00347744	2.96869	Up
Q8N1F7	NUP93	0.000683761	0.00347744	2.96735	Up
O75821	EIF3G	0.000683761	0.00347744	2.96502	Up
O43684	BUB3	0.000683761	0.00347744	2.96088	Up
P08621	SNRNP70	0.00136752	0.00521075	2.96032	Up
Q92945	KHSRP	0.000683761	0.00347744	2.95305	Up
O75367	MACROH2A1	0.000683761	0.00347744	2.94851	Up
Q15691	MAPRE1	0.000683761	0.00347744	2.94765	Up
Q15067	ACOX1	0.00136752	0.00521075	2.94716	Up
Q9H0W9	C11orf54	0.000683761	0.00347744	2.93462	Up
O75844	ZMPSTE24	0.00478633	0.0135902	2.92484	Up
Q8TEM1	NUP210	0.00760602	0.0195954	2.92064	Up
O15230	LAMA5	0.0157265	0.0350038	2.91866	Up
P17844	DDX5	8.06784e-06	0.000380326	2.91246	Up
Q96K76	USP47	0.000683761	0.00347744	2.91164	Up
Q06787	FMR1	0.000683761	0.00347744	2.91124	Up
Q9Y2W1	THRAP3	0.00273504	0.00889978	2.90782	Up
Q15084	PDIA6	0.00136752	0.00521075	2.90742	Up
Q03154	ACY1	0.00273504	0.00889978	2.90606	Up
Q6XQN6	NAPRT	0.00850815	0.0214277	2.90106	Up
O60504	SORBS3	0.00752137	0.019435	2.90068	Up
P07910	HNRNPC	5.60328e-06	0.000307512	2.899	Up
Q9UJ70	NAGK	0.00136752	0.00521075	2.89655	Up
P0DN76	U2AF5	0.00752137	0.019435	2.89305	Up
Q86U42	PABPN1	9.49693e-05	0.00242501	2.89254	Up
P29692	EEF1D	0.000683761	0.00347744	2.89002	Up
Q9Y490	TLN1	0.0157265	0.0350038	2.87664	Up
Q9BRA2	TXNDC17	0.00364947	0.0114988	2.87495	Up
P39656	DDOST	4.35768e-05	0.0013579	2.87375	Up
P22626	HNRNPA2B1	0.000683761	0.00347744	2.86966	Up
Q9NY33	DPP3	0.000683761	0.00347744	2.86901	Up
O75533	SF3B1	0.000132659	0.00306784	2.86764	Up
O75695	RP2	0.000683761	0.00347744	2.86633	Up
Q96P70	IPO9	0.0010477	0.00460814	2.86362	Up
Q99459	CDC5L	0.00136752	0.00521075	2.86219	Up
Q16401	PSMD5	9.92334e-05	0.00251642	2.85631	Up
Q96BY6	DOCK10	0.000156412	0.0033831	2.85376	Up
P53618	COPB1	0.00273504	0.00889978	2.85004	Up
P16402	H1-3	0.021305	0.0447661	2.84955	Up
P36551	CPOX	0.00601504	0.0164808	2.84095	Up
Q9NYF8	BCLAF1	0.000683761	0.00347744	2.8317	Up
P18206	VCL	0.00150183	0.00564217	2.8311	Up
P62805	H4C1	0.000683761	0.00347744	2.83048	Up
Q96JB5	CDK5RAP3	0.000683761	0.00347744	2.82496	Up
Q7L576	CYFIP1	0.00273504	0.00889978	2.81816	Up
P14866	HNRNPL	0.000683761	0.00347744	2.81496	Up
Q8IYB3	SRRM1	0.0211966	0.044588	2.81432	Up
Q13573	SNW1	0.0176923	0.0386999	2.81253	Up
Q15363	TMED2	2.78436e-05	0.000993991	2.81235	Up
P09132	SRP19	1.39203e-05	0.000568721	2.80931	Up
P62081	RPS7	0.000210817	0.00347744	2.80679	Up
O76003	GLRX3	0.0109402	0.0259362	2.80648	Up
Q9H9G7	AGO3	0.0227273	0.0472938	2.8043	Up
Q8ND56	LSM14A	0.0238461	0.0491493	2.80349	Up
Q86XP3	DDX42	0.00478633	0.0135902	2.7909	Up
Q96A33	CCDC47	2.89429e-06	0.000194049	2.78462	Up
O75131	CPNE3	2.78658e-06	0.000193325	2.7709	Up
Q9Y265	RUVBL1	0.000683761	0.00347744	2.76988	Up
Q8IWX8	CHERP	0.0109402	0.0259362	2.76889	Up
P26639	TARS1	0.000683761	0.00347744	2.76746	Up
P55769	SNU13	0.0109402	0.0259362	2.7632	Up
Q9Y316	MEMO1	0.00752137	0.019435	2.76085	Up
Q14966	ZNF638	0.000683761	0.00347744	2.75753	Up
Q8NEU8	APPL2	0.000107644	0.00263872	2.75354	Up
P20042	EIF2S2	0.0152401	0.0350038	2.7508	Up
P13807	GYS1	0.00752137	0.019435	2.74747	Up
P02649	APOE	0.0109402	0.0259362	2.74264	Up
P04217	A1BG	0.0211966	0.044588	2.73174	Up
Q9GZZ1	NAA50	0.00415308	0.012876	2.73115	Up
Q562E7	WDR81	0.000956601	0.00431302	2.72933	Up
O00178	GTPBP1	0.0109402	0.0259362	2.71836	Up
P62701	RPS4X	8.01273e-07	9.82093e-05	2.71442	Up
Q92841	DDX17	1.72518e-06	0.000154719	2.71386	Up
Q10570	CPSF1	0.00136752	0.00521075	2.70451	Up
Q9HD20	ATP13A1	0.0211966	0.044588	2.70276	Up
Q92625	ANKS1A	0.00608696	0.016616	2.69984	Up
Q86UU1	PHLDB1	0.00136752	0.00521075	2.6962	Up
Q15424	SAFB	0.00478633	0.0135902	2.69453	Up
P62273	RPS29	0.0076841	0.0197583	2.69184	Up
Q16629	SRSF7	6.45226e-05	0.00177327	2.69088	Up
P09525	ANXA4	0.000711829	0.0036102	2.68522	Up
Q5SSJ5	HP1BP3	2.05778e-05	0.000788173	2.68096	Up
Q969X5	ERGIC1	0.00478633	0.0135902	2.67728	Up
Q8N8N7	PTGR2	0.0131967	0.0308285	2.67498	Up
P51648	ALDH3A2	0.000683761	0.00347744	2.66527	Up
O60506	SYNCRIP	0.000210775	0.00347744	2.6625	Up
Q8N8S7	ENAH	0.00478633	0.0135902	2.66202	Up
Q96CM8	ACSF2	0.00307692	0.00987247	2.66117	Up
Q13177	PAK2	0.00136752	0.00521075	2.65737	Up
P27635	RPL10	0.00874806	0.0219567	2.65544	Up
P46783	RPS10	0.000428215	0.00347744	2.65517	Up
Q14195	DPYSL3	0.00103837	0.00457691	2.65438	Up
P62318	SNRPD3	0.0046417	0.0135902	2.6537	Up
P42566	EPS15	0.0109402	0.0259362	2.64727	Up
Q9UHL4	DPP7	0.00049728	0.00347744	2.64586	Up
Q12906	ILF3	0.00273504	0.00889978	2.63915	Up
P15927	RPA2	0.000683761	0.00347744	2.63353	Up
Q6ZWT7	MBOAT2	0.0211966	0.044588	2.63219	Up
P53985	SLC16A1	0.00752137	0.019435	2.6285	Up
Q9BXJ9	NAA15	0.0184343	0.0401321	2.62297	Up
Q2M389	WASHC4	7.65805e-06	0.000370508	2.6175	Up
Q13247	SRSF6	0.000769231	0.00364963	2.61678	Up
Q8N8A2	ANKRD44	0.000683761	0.00347744	2.61606	Up
Q9P2K5	MYEF2	0.0157265	0.0350038	2.61353	Up
Q8N163	CCAR2	0.00752137	0.019435	2.61157	Up
Q16630	CPSF6	0.000486989	0.00347744	2.60502	Up
Q13642	FHL1	0.0109402	0.0259362	2.604	Up
Q86UP2	KTN1	1.24628e-09	9.16516e-07	2.60093	Up
Q92575	UBXN4	0.00759701	0.0195892	2.59906	Up
O15116	LSM1	0.00347826	0.0110255	2.59729	Up
P02747	C1QC	0.00140738	0.00535707	2.5972	Up
Q99598	TSNAX	0.00136752	0.00521075	2.58908	Up
O15371	EIF3D	0.0137816	0.0320321	2.58198	Up
Q9Y2Q3	GSTK1	0.0211966	0.044588	2.57755	Up
P27824	CANX	0.000683761	0.00347744	2.57747	Up
Q12905	ILF2	0.000868608	0.00395717	2.57722	Up
Q96MU7	YTHDC1	0.0185983	0.0403934	2.57626	Up
Q08379	GOLGA2	0.00136752	0.00521075	2.57395	Up
Q99714	HSD17B10	0.000683761	0.00347744	2.57006	Up
Q12768	WASHC5	7.83705e-05	0.00213369	2.56906	Up
P61221	ABCE1	2.5688e-06	0.000185363	2.56655	Up
P42229	STAT5A	0.00273504	0.00889978	2.56559	Up
O94874	UFL1	0.00454984	0.0135902	2.56535	Up
O00116	AGPS	0.000683761	0.00347744	2.56388	Up
P04080	CSTB	0.00752137	0.019435	2.56052	Up
P48507	GCLM	0.0109402	0.0259362	2.55792	Up
P62263	RPS14	0.000477004	0.00347744	2.55483	Up
O00273	DFFA	0.000683761	0.00347744	2.55418	Up
P61254	RPL26	0.0109402	0.0259362	2.55276	Up
Q08211	DHX9	9.268e-07	0.000103268	2.55276	Up
P27797	CALR	0.000683761	0.00347744	2.55094	Up
P84103	SRSF3	0.0157265	0.0350038	2.54987	Up
P33240	CSTF2	0.00307692	0.00987247	2.5484	Up
A4D1P6	WDR91	2.42776e-05	0.000895573	2.53853	Up
P62306	SNRPF	0.00592988	0.0162961	2.53546	Up
O00303	EIF3F	0.000683761	0.00347744	2.52714	Up
Q8WVV9	HNRNPLL	0.000172221	0.00347744	2.52438	Up
P42677	RPS27	0.000145884	0.00323141	2.52373	Up
P63220	RPS21	0.000683761	0.00347744	2.52169	Up
Q13243	SRSF5	0.00538461	0.0149428	2.51431	Up
P54886	ALDH18A1	0.00478633	0.0135902	2.5093	Up
P46976	GYG1	0.0203762	0.0440207	2.50903	Up
P04843	RPN1	0.00273504	0.00889978	2.50795	Up
P56537	EIF6	0.000174409	0.00347744	2.50699	Up
P30626	SRI	0.00478633	0.0135902	2.50666	Up
Q8IWW6	ARHGAP12	0.00846154	0.0213396	2.50629	Up
P62249	RPS16	0.0033317	0.0106251	2.50581	Up
O75475	PSIP1	0.0109402	0.0259362	2.50132	Up
P35606	COPB2	9.16464e-07	0.000103268	2.50083	Up
P14625	HSP90B1	0.000683761	0.00347744	2.49846	Up
Q9UBN7	HDAC6	3.13627e-06	0.00020593	2.49802	Up
P23284	PPIB	0.00478633	0.0135902	2.49553	Up
Q9BWJ5	SF3B5	1.91655e-05	0.000757757	2.49354	Up
Q9H6V9	LDAH	0.00538461	0.0149428	2.49346	Up
Q14108	SCARB2	0.00136752	0.00521075	2.49339	Up
P06748	NPM1	0.00273504	0.00889978	2.49281	Up
Q9NWV4	CZIB	9.74011e-06	0.000442153	2.49206	Up
Q99829	CPNE1	0.0211966	0.044588	2.48928	Up
P60228	EIF3E	0.000683761	0.00347744	2.48863	Up
Q9Y678	COPG1	0.00273504	0.00889978	2.48579	Up
Q7KZF4	SND1	0.000683761	0.00347744	2.48253	Up
O75027	ABCB7	0.00273504	0.00889978	2.47956	Up
Q01130	SRSF2	0.000760012	0.00364963	2.47746	Up
Q8IZ83	ALDH16A1	0.00562648	0.0155203	2.47372	Up
P37108	SRP14	0.00752137	0.019435	2.47061	Up
P22307	SCP2	0.000683761	0.00347744	2.46997	Up
Q13683	ITGA7	0.0157265	0.0350038	2.46888	Up
O15260	SURF4	0.0157265	0.0350038	2.46791	Up
P13639	EEF2	0.00551924	0.0152588	2.46055	Up
Q9P000	COMMD9	0.00136752	0.00521075	2.45865	Up
Q9UK41	VPS28	0.00989679	0.0243904	2.45616	Up
Q9Y6B6	SAR1B	0.000154057	0.00335187	2.45412	Up
P84243	H3-3A	0.000134974	0.00307369	2.45393	Up
P00167	CYB5A	0.000683761	0.00347744	2.44951	Up
Q9H3P7	ACBD3	0.0016041	0.00593386	2.44741	Up
Q96KR1	ZFR	0.0135566	0.0316091	2.44722	Up
P28288	ABCD3	2.94038e-05	0.00101045	2.44595	Up
P10412	H1-4	0.0109402	0.0259362	2.44558	Up
Q92804	TAF15	0.000889791	0.00404421	2.44472	Up
Q86W92	PPFIBP1	0.00887754	0.0221983	2.44423	Up
Q9UHB9	SRP68	6.38351e-08	1.45145e-05	2.44376	Up
Q9BXV9	GON7	2.85846e-05	0.00100909	2.44265	Up
P48444	ARCN1	7.86204e-07	9.82093e-05	2.44226	Up
Q96SU4	OSBPL9	0.0109402	0.0259362	2.43841	Up
Q8TCD5	NT5C	0.00785648	0.0201593	2.43768	Up
Q13496	MTM1	0.000683761	0.00347744	2.43518	Up
P50570	DNM2	0.00108119	0.00472717	2.43339	Up
Q14019	COTL1	0.00478633	0.0135902	2.43267	Up
Q9UBE0	SAE1	0.003713	0.011669	2.43044	Up
O95817	BAG3	0.00112049	0.00483969	2.42725	Up
Q96HY6	DDRGK1	9.03023e-06	0.000415052	2.42631	Up
Q07666	KHDRBS1	0.000683761	0.00347744	2.41906	Up
Q9BZK7	TBL1XR1	0.00010741	0.00263872	2.4165	Up
P15311	EZR	0.00478633	0.0135902	2.41452	Up
P53999	SUB1	0.000256189	0.00347744	2.41444	Up
O14773	TPP1	0.0157265	0.0350038	2.41341	Up
O95671	ASMTL	0.000683761	0.00347744	2.40821	Up
O00291	HIP1	0.000484652	0.00347744	2.40623	Up
P48059	LIMS1	4.79282e-05	0.00145646	2.40032	Up
Q8TCS8	PNPT1	0.00144918	0.00549343	2.39907	Up
P30050	RPL12	0.000781928	0.00370509	2.3957	Up
Q14165	MLEC	1.03155e-05	0.000446237	2.39446	Up
P31942	HNRNPH3	0.00136752	0.00521075	2.39058	Up
Q8NFQ8	TOR1AIP2	0.0157265	0.0350038	2.38622	Up
Q15121	PEA15	0.0211966	0.044588	2.38526	Up
O75832	PSMD10	0.00273504	0.00889978	2.38417	Up
Q9NZN4	EHD2	0.00367883	0.0115715	2.3839	Up
Q00341	HDLBP	0.00273504	0.00889978	2.38044	Up
Q13148	TARDBP	0.00273504	0.00889978	2.38	Up
Q9BVG4	PBDC1	0.000534006	0.00347744	2.37717	Up
Q9Y3E0	GOLT1B	0.00752137	0.019435	2.37636	Up
P19623	SRM	0.000257028	0.00347744	2.37594	Up
Q07955	SRSF1	0.00720652	0.0193419	2.37387	Up
Q92973	TNPO1	0.0121292	0.028571	2.37277	Up
P39019	RPS19	8.20107e-05	0.00218517	2.36886	Up
P42766	RPL35	0.017469	0.0384632	2.36787	Up
P51580	TPMT	0.000683761	0.00347744	2.36751	Up
O75477	ERLIN1	0.00478633	0.0135902	2.36674	Up
O14744	PRMT5	0.0156574	0.0350038	2.36305	Up
P62280	RPS11	0.0214461	0.0449841	2.3572	Up
O75352	MPDU1	0.000179258	0.00347744	2.34397	Up
Q96AC1	FERMT2	0.000683761	0.00347744	2.34019	Up
P78560	CRADD	0.0105263	0.0257863	2.33372	Up
P47897	QARS1	7.86759e-07	9.82093e-05	2.33333	Up
Q8NBF2	NHLRC2	0.00273504	0.00889978	2.33126	Up
P62995	TRA2B	0.00478633	0.0135902	2.32893	Up
Q8WVC6	DCAKD	0.0211966	0.044588	2.3271	Up
P07099	EPHX1	0.00752137	0.019435	2.32407	Up
P41091	EIF2S3	0.000683761	0.00347744	2.32276	Up
Q96IJ6	GMPPA	0.00752137	0.019435	2.32272	Up
Q96AG4	LRRC59	0.00136752	0.00521075	2.32	Up
P52209	PGD	0.00015079	0.00330034	2.31908	Up
P18077	RPL35A	0.000158988	0.00338605	2.31488	Up
Q9NUU7	DDX19A	1.65582e-05	0.000669058	2.31308	Up
O95249	GOSR1	0.00517964	0.0146167	2.30889	Up
P62424	RPL7A	0.000304332	0.00347744	2.30459	Up
P06396	GSN	3.63998e-05	0.00118444	2.30175	Up
P06756	ITGAV	0.0157265	0.0350038	2.30034	Up
Q14669	TRIP12	0.00136752	0.00521075	2.3	Up
P14314	PRKCSH	0.000185307	0.00347744	2.29998	Up
P62269	RPS18	0.00885054	0.0221837	2.29927	Up
Q96AE4	FUBP1	8.65474e-06	0.000402829	2.29439	Up
O95865	DDAH2	0.00075099	0.00364963	2.29427	Up
Q7Z3J2	VPS35L	3.93847e-08	9.71416e-06	2.29169	Up
Q5T1M5	FKBP15	0.000683761	0.00347744	2.28791	Up
P40616	ARL1	0.0111489	0.026397	2.28788	Up
P23396	RPS3	0.000758277	0.00364963	2.28738	Up
Q13325	IFIT5	0.00523681	0.0147215	2.28389	Up
P23246	SFPQ	0.000601966	0.00347744	2.28316	Up
O95159	ZFPL1	0.0176923	0.0386999	2.28284	Up
Q9UBI6	GNG12	0.000894555	0.00405806	2.2815	Up
Q9UKX7	NUP50	0.0109402	0.0259362	2.27896	Up
Q13347	EIF3I	0.000911556	0.00412275	2.27449	Up
Q14103	HNRNPD	0.00107331	0.0047039	2.26637	Up
P30533	LRPAP1	0.00136752	0.00521075	2.25943	Up
Q9Y2W2	WBP11	3.63191e-06	0.00023025	2.2577	Up
Q49A26	GLYR1	0.000683761	0.00347744	2.25386	Up
O00571	DDX3X	0.000683761	0.00347744	2.24837	Up
Q9C005	DPY30	0.000530453	0.00347744	2.24661	Up
P51151	RAB9A	0.0211966	0.044588	2.24647	Up
Q14697	GANAB	0.00136752	0.00521075	2.24186	Up
Q01844	EWSR1	0.00478633	0.0135902	2.24179	Up
P51178	PLCD1	0.00172134	0.00635481	2.24162	Up
P60866	RPS20	0.0137471	0.0319723	2.24095	Up
O43809	NUDT21	0.00156524	0.00580179	2.23959	Up
Q5QJ74	TBCEL	0.00478633	0.0135902	2.23903	Up
P53621	COPA	0.00273504	0.00889978	2.23406	Up
P25398	RPS12	7.27162e-06	0.000366271	2.23291	Up
Q53GQ0	HSD17B12	0.00478633	0.0135902	2.23232	Up
Q96M27	PRRC1	0.0176923	0.0386999	2.23054	Up
P04632	CAPNS1	3.80052e-06	0.000236856	2.22457	Up
P63241	EIF5A	0.00484405	0.0137435	2.22266	Up
P69849	NOMO3	0.000683761	0.00347744	2.22164	Up
Q9BV86	NTMT1	0.0105646	0.0258629	2.21259	Up
O75521	ECI2	0.00478633	0.0135902	2.21182	Up
Q9Y2V2	CARHSP1	0.0157265	0.0350038	2.20688	Up
O43390	HNRNPR	0.000683761	0.00347744	2.20635	Up
P32121	ARRB2	0.000462629	0.00347744	2.19957	Up
P55884	EIF3B	0.00229079	0.00807596	2.19583	Up
P55265	ADAR	0.00726561	0.019435	2.18934	Up
Q99613	EIF3C	0.00273504	0.00889978	2.18653	Up
P05387	RPLP2	0.00447515	0.0135902	2.1845	Up
Q9NRX4	PHPT1	0.00216272	0.00769828	2.18401	Up
Q02543	RPL18A	0.00178691	0.00649516	2.18059	Up
Q15005	SPCS2	1.00023e-05	0.000446237	2.17357	Up
P24928	POLR2A	0.0157265	0.0350038	2.17354	Up
Q14696	MESD	3.40195e-07	5.00358e-05	2.16778	Up
Q9P2R3	ANKFY1	0.000683761	0.00347744	2.16602	Up
Q96BJ3	AIDA	0.00136752	0.00521075	2.16418	Up
Q8NFF5	FLAD1	0.0238461	0.0491493	2.15438	Up
P25325	MPST	6.26288e-05	0.00177143	2.14588	Up
P29966	MARCKS	0.00752137	0.019435	2.14344	Up
P10301	RRAS	0.000623534	0.00347744	2.14332	Up
P40189	IL6ST	0.00206398	0.00735394	2.13703	Up
Q6IAA8	LAMTOR1	0.000116209	0.00281117	2.133	Up
Q9Y230	RUVBL2	0.000683761	0.00347744	2.13225	Up
P08865	RPSA	0.0109402	0.0259362	2.13179	Up
Q9ULV4	CORO1C	0.0109402	0.0259362	2.12755	Up
O43324	EEF1E1	0.00887573	0.0221983	2.12543	Up
O14579	COPE	0.000119964	0.00286714	2.12291	Up
Q92538	GBF1	0.0109402	0.0259362	2.12258	Up
O94905	ERLIN2	0.00136752	0.00521075	2.11431	Up
Q9Y4X5	ARIH1	0.0157265	0.0350038	2.11281	Up
P21399	ACO1	0.00048526	0.00347744	2.11151	Up
Q07954	LRP1	0.0157265	0.0350038	2.11134	Up
Q8WW12	PCNP	2.43561e-05	0.000895573	2.11125	Up
P22234	PAICS	0.000683761	0.00347744	2.10497	Up
Q9HB90	RRAGC	0.00478633	0.0135902	2.09789	Up
P40939	HADHA	0.000683761	0.00347744	2.09497	Up
Q8WVY7	UBLCP1	0.0231305	0.047916	2.09379	Up
Q8WU90	ZC3H15	0.0122574	0.0288543	2.09269	Up
O43264	ZW10	0.000120081	0.00286714	2.09109	Up
Q13155	AIMP2	0.000683761	0.00347744	2.09072	Up
P46778	RPL21	3.25258e-05	0.00110738	2.08902	Up
P55145	MANF	0.00125414	0.00521075	2.08798	Up
O15372	EIF3H	2.52196e-08	7.50522e-06	2.08248	Up
Q9BQA1	WDR77	1.2364e-05	0.000510816	2.07241	Up
Q9NRY5	FAM114A2	0.0157265	0.0350038	2.07148	Up
Q9UBS4	DNAJB11	0.000237966	0.00347744	2.06888	Up
Q99873	PRMT1	0.0109402	0.0259362	2.06876	Up
Q14353	GAMT	0.00290286	0.00942085	2.06561	Up
A0AVT1	UBA6	0.0230224	0.0477458	2.06204	Up
Q9BS26	ERP44	0.00752137	0.019435	2.05915	Up
P61006	RAB8A	0.00136752	0.00521075	2.05779	Up
P84090	ERH	0.00328735	0.0105018	2.05645	Up
P23786	CPT2	0.000125236	0.00297092	2.05554	Up
P05386	RPLP1	0.000724903	0.00364963	2.0506	Up
P13489	RNH1	0.0234208	0.04849	2.04531	Up
Q9Y5X3	SNX5	0.000683761	0.00347744	2.04322	Up
Q13409	DYNC1I2	4.19844e-06	0.000248995	2.04158	Up
P46777	RPL5	8.05185e-05	0.00216107	2.04054	Up
P26640	VARS1	0.00716374	0.0192552	2.03267	Up
Q9Y262	EIF3L	0.000683761	0.00347744	2.02575	Up
Q9Y3C8	UFC1	0.00496501	0.0140433	2.0257	Up
Q9Y3C6	PPIL1	0.0077362	0.0198784	2.02237	Up
Q9NR56	MBNL1	0.000683761	0.00347744	2.02182	Up
Q9H9T3	ELP3	0.000390931	0.00347744	2.02113	Up
O75351	VPS4B	5.57396e-06	0.000307512	2.01905	Up
Q8N4P3	HDDC3	0.00765701	0.0197025	2.01752	Up
P31939	ATIC	0.00352902	0.0111575	2.01562	Up
Q641Q2	WASHC2A	0.00359435	0.0113348	2.01253	Up
Q9UI26	IPO11	0.0123077	0.0288803	2.01247	Up
Q14166	TTLL12	0.0157265	0.0350038	2.01242	Up
P22392	NME2	5.03422e-06	0.000289232	2.01233	Up
P19525	EIF2AK2	0.00794939	0.0202704	2.01121	Up
Q8WWM7	ATXN2L	0.000456166	0.00347744	2.00963	Up
Q9NWH9	SLTM	1.0223e-05	0.000446237	2.00588	Up
Q9BVK6	TMED9	3.54803e-05	0.0011752	2.00381	Up
Q14694	USP10	0.0171393	0.0378733	2.00205	Up
P62841	RPS15	0.00275894	0.0089696	2.00022	Up
P13716	ALAD	0.0223618	0.0467183	1.9939	Up
Q9BT09	CNPY3	0.0113763	0.0269007	1.99373	Up
Q15126	PMVK	0.0204091	0.0440658	1.99055	Up
P78344	EIF4G2	0.00568023	0.0156568	1.98873	Up
Q15366	PCBP2	0.000205032	0.00347744	1.98773	Up
Q15631	TSN	0.0164645	0.0364918	1.98662	Up
P51608	MECP2	0.0136576	0.0318245	1.98101	Up
Q6PJI9	WDR59	0.000691408	0.00351148	1.97727	Up
Q9NX46	ADPRS	0.00752137	0.019435	1.9756	Up
Q8NC51	SERBP1	0.00607701	0.016616	1.97477	Up
P49755	TMED10	7.55612e-06	0.000370508	1.97417	Up
Q9P2J5	LARS1	0.0225106	0.0470025	1.97127	Up
P30101	PDIA3	0.00273504	0.00889978	1.9708	Up
Q14139	UBE4A	0.0184621	0.0401449	1.96825	Up
P49458	SRP9	0.0157265	0.0350038	1.96709	Up
P33176	KIF5B	0.000683761	0.00347744	1.96661	Up
P62750	RPL23A	6.33209e-05	0.00177327	1.96606	Up
P37837	TALDO1	0.00478633	0.0135902	1.96107	Up
Q96E39	RBMXL1	0.0184499	0.0401422	1.95671	Up
P11117	ACP2	0.0211966	0.044588	1.95466	Up
Q96RS6	NUDCD1	0.0176923	0.0386999	1.9536	Up
P14868	DARS1	0.00136752	0.00521075	1.95248	Up
Q9UQ80	PA2G4	0.00390961	0.0122346	1.93983	Up
P35914	HMGCL	0.0172123	0.0379662	1.9393	Up
P60660	MYL6	0.00107747	0.0047165	1.93904	Up
O75822	EIF3J	0.0211966	0.044588	1.93134	Up
Q9Y394	DHRS7	0.0211966	0.044588	1.91957	Up
Q5SQI0	ATAT1	0.0152199	0.0349992	1.9141	Up
Q13596	SNX1	0.0109402	0.0259362	1.91348	Up
P07203	GPX1	0.00752137	0.019435	1.91151	Up
P11021	HSPA5	0.0109402	0.0259362	1.91102	Up
P62341	SELENOT	0.00136752	0.00521075	1.90867	Up
P46108	CRK	0.00478633	0.0135902	1.90803	Up
O15511	ARPC5	0.000683761	0.00347744	1.90451	Up
Q6NVY1	HIBCH	0.0211966	0.044588	1.90288	Up
Q96QR8	PURB	0.0157265	0.0350038	1.90172	Up
Q07157	TJP1	2.33985e-06	0.000185363	1.90126	Up
P55084	HADHB	0.00273504	0.00889978	1.89705	Up
Q9NUQ8	ABCF3	0.00478633	0.0135902	1.8953	Up
O94979	SEC31A	0.00478633	0.0135902	1.89376	Up
Q6Y7W6	GIGYF2	0.00752137	0.019435	1.89101	Up
P50579	METAP2	0.00589926	0.0162241	1.88651	Up
P53004	BLVRA	0.00366114	0.0115257	1.88205	Up
Q92530	PSMF1	0.0164844	0.0364964	1.88087	Up
Q9Y3E5	PTRH2	0.000181655	0.00347744	1.87984	Up
P09110	ACAA1	0.000867722	0.00395717	1.87847	Up
P43243	MATR3	0.00178763	0.00649516	1.8776	Up
P26641	EEF1G	0.00107205	0.0047039	1.87759	Up
P46781	RPS9	0.000757596	0.00364963	1.87743	Up
P11586	MTHFD1	0.0104329	0.0256086	1.87335	Up
O60749	SNX2	1.13056e-05	0.000472395	1.86893	Up
Q7Z739	YTHDF3	0.00714669	0.0192234	1.86568	Up
O95295	SNAPIN	5.96003e-05	0.00169884	1.86151	Up
Q06136	KDSR	0.00316554	0.0101391	1.85758	Up
P55735	SEC13	0.00752137	0.019435	1.85705	Up
O14980	XPO1	0.000446825	0.00347744	1.85615	Up
P11940	PABPC1	0.00445721	0.0135902	1.83922	Up
P16104	H2AX	0.0186999	0.04059	1.83829	Up
P62917	RPL8	0.00818839	0.0208221	1.83828	Up
O43488	AKR7A2	0.000683761	0.00347744	1.83147	Up
Q14152	EIF3A	0.000683761	0.00347744	1.82936	Up
P25787	PSMA2	0.000683761	0.00347744	1.82737	Up
Q13619	CUL4A	0.00305898	0.00987247	1.82624	Up
Q13200	PSMD2	0.00100129	0.00441986	1.82476	Up
Q9H2K8	TAOK3	0.00420408	0.0129952	1.82102	Up
Q99615	DNAJC7	0.00522211	0.0146914	1.81929	Up
O76071	CIAO1	0.0114963	0.0271322	1.81683	Up
Q9GZT9	EGLN1	0.00271823	0.00889978	1.81584	Up
Q04323	UBXN1	0.022954	0.0476577	1.81215	Up
P14550	AKR1A1	0.00585412	0.016112	1.79888	Up
P52294	KPNA1	0.0010731	0.0047039	1.79385	Up
Q9BR76	CORO1B	0.00136752	0.00521075	1.7927	Up
P28070	PSMB4	0.00273504	0.00889978	1.79222	Up
Q9NPA8	ENY2	0.00956522	0.0236844	1.79058	Up
Q92896	GLG1	0.000469378	0.00347744	1.79021	Up
O95861	BPNT1	0.00478633	0.0135902	1.78957	Up
O95630	STAMBP	0.0107913	0.0259362	1.78825	Up
Q7Z6Z7	HUWE1	0.0157698	0.0350789	1.78726	Up
Q9BSD7	NTPCR	0.020243	0.0437845	1.78679	Up
Q9BSJ2	TUBGCP2	0.0109402	0.0259362	1.78533	Up
Q15365	PCBP1	0.000509047	0.00347744	1.78348	Up
P00387	CYB5R3	0.00478633	0.0135902	1.7814	Up
Q9BRP8	PYM1	0.00478633	0.0135902	1.77297	Up
O15067	PFAS	0.000724108	0.00364963	1.77142	Up
P26196	DDX6	0.0061762	0.0168097	1.7677	Up
Q9UP83	COG5	6.44597e-05	0.00177327	1.76425	Up
Q6IPX3	TCEAL6	0.005003	0.0141359	1.7613	Up
Q13442	PDAP1	0.0130619	0.0305331	1.75687	Up
O60826	CCDC22	0.00752137	0.019435	1.75647	Up
Q16881	TXNRD1	0.0151035	0.0347531	1.75188	Up
P51812	RPS6KA3	0.00226725	0.00801605	1.74995	Up
P57772	EEFSEC	9.2158e-05	0.00236968	1.74155	Up
P40818	USP8	0.00032035	0.00347744	1.7387	Up
O95487	SEC24B	0.0207296	0.044588	1.73756	Up
Q5VWZ2	LYPLAL1	0.00500543	0.0141359	1.73108	Up
O43598	DNPH1	0.00194843	0.00704461	1.72941	Up
Q9UM54	MYO6	2.46556e-06	0.000185363	1.7289	Up
Q6IA86	ELP2	0.000139685	0.00313185	1.72886	Up
Q01518	CAP1	0.0109402	0.0259362	1.71626	Up
P11766	ADH5	0.010169	0.0250109	1.71179	Up
Q8WVM8	SCFD1	0.0146716	0.0337804	1.70938	Up
Q8TBC4	UBA3	0.00679446	0.01837	1.70728	Up
Q9Y3B3	TMED7	0.00073659	0.00364963	1.7068	Up
P49770	EIF2B2	0.0109402	0.0259362	1.70664	Up
P53990	IST1	0.000683761	0.00347744	1.70554	Up
Q14376	GALE	0.0114068	0.0269556	1.70007	Up
P36954	POLR2I	0.00420567	0.0129952	1.69701	Up
Q9UNH7	SNX6	0.00470445	0.0135902	1.6926	Up
Q9NR45	NANS	0.0109402	0.0259362	1.69158	Up
P51991	HNRNPA3	0.000815578	0.00384966	1.69107	Up
Q5JTZ9	AARS2	0.022259	0.0465566	1.68553	Up
Q92879	CELF1	0.0064753	0.0175458	1.68551	Up
Q9Y3I0	RTCB	8.27017e-05	0.00218773	1.68501	Up
Q14974	KPNB1	0.000768442	0.00364963	1.67823	Up
Q14978	NOLC1	0.00849788	0.0214165	1.67646	Up
Q3V6T2	CCDC88A	0.0229531	0.0476577	1.67356	Up
Q9Y5A9	YTHDF2	0.0157265	0.0350038	1.67271	Up
P09382	LGALS1	0.0163928	0.0363547	1.66782	Up
O95166	GABARAP	1.39237e-07	2.55987e-05	1.66139	Up
Q9UM00	TMCO1	0.000302252	0.00347744	1.65991	Up
P09960	LTA4H	0.000683761	0.00347744	1.65593	Up
Q9BY44	EIF2A	0.00822679	0.0209053	1.65443	Up
Q9H3K6	BOLA2	0.0102985	0.0252957	1.65312	Up
Q9Y371	SH3GLB1	0.0104521	0.0256387	1.64269	Up
P07814	EPRS1	0.00659866	0.0178538	1.63516	Up
Q14161	GIT2	0.00156455	0.00580179	1.63156	Up
P39023	RPL3	0.000300285	0.00347744	1.62881	Up
Q96CT7	CCDC124	0.00417577	0.0129354	1.62771	Up
P43686	PSMC4	1.83829e-06	0.000160369	1.62673	Up
Q9NZ01	TECR	0.0157265	0.0350038	1.61763	Up
O00232	PSMD12	0.0223337	0.0466861	1.61669	Up
Q13310	PABPC4	0.0222173	0.0464958	1.61177	Up
O60271	SPAG9	0.00222979	0.00792169	1.61029	Up
Q92900	UPF1	0.00478633	0.0135902	1.60446	Up
Q5MNZ6	WDR45B	1.70224e-06	0.000154719	1.60275	Up
Q8N6M0	OTUD6B	0.00478633	0.0135902	1.59882	Up
Q92890	UFD1	0.00706605	0.0190204	1.59734	Up
P23368	ME2	0.000379034	0.00347744	1.58617	Up
Q12800	TFCP2	0.00605424	0.0165759	1.58085	Up
Q13620	CUL4B	1.10583e-05	0.000467372	1.57913	Up
Q9NZB2	FAM120A	0.00652091	0.0176564	1.56799	Up
P49721	PSMB2	0.0166265	0.0367843	1.56222	Up
Q9NQZ5	STARD7	0.0227598	0.0473347	1.56181	Up
Q13867	BLMH	0.0183561	0.0400092	1.55208	Up
Q9C0C2	TNKS1BP1	0.0134922	0.0314789	1.55085	Up
Q969H8	MYDGF	0.0014481	0.00549343	1.54497	Up
O14818	PSMA7	0.00581148	0.0160066	1.53976	Up
P25789	PSMA4	0.0173527	0.038253	1.53188	Up
P46109	CRKL	0.00496077	0.0140421	1.53074	Up
P15170	GSPT1	0.00752137	0.019435	1.52376	Up
Q15046	KARS1	0.00467974	0.0135902	1.5092	Up
Q96CS3	FAF2	0.0157265	0.0350038	1.50229	Up
Q16740	CLPP	0.006917	0.0186739	1.50185	Up
O43765	SGTA	3.34267e-05	0.00112088	1.50088	Up
P20339	RAB5A	0.00979327	0.0241677	1.4886	Up
O75083	WDR1	0.0109402	0.0259362	1.4786	Up
Q9Y5P4	CERT1	0.0183791	0.0400355	1.4775	Up
P78406	RAE1	0.00786359	0.0201635	1.47183	Up
O43242	PSMD3	0.00478633	0.0135902	1.46314	Up
P53992	SEC24C	0.0177896	0.0388896	1.45893	Up
Q8N5M9	JAGN1	0.00383864	0.0120256	1.45128	Up
P17980	PSMC3	0.00402289	0.0125251	1.43545	Up
Q9HD45	TM9SF3	0.00862806	0.0216852	1.43294	Up
Q969V3	NCLN	0.000681025	0.00347744	1.43162	Up
P25788	PSMA3	4.28738e-06	0.000250233	1.42957	Up
P07384	CAPN1	0.00193396	0.00699918	1.41652	Up
P51665	PSMD7	0.00973776	0.0240489	1.41196	Up
Q8N766	EMC1	0.00122112	0.00521075	1.40852	Up
O60716	CTNND1	0.00103936	0.00457691	1.38547	Up
P23528	CFL1	0.000957145	0.00431302	1.36753	Up
P51148	RAB5C	0.0080856	0.0205749	1.34774	Up
E9PAV3	NACA	0.0153332	0.0350038	1.34672	Up
Q14157	UBAP2L	0.0209894	0.044588	1.34628	Up
Q99816	TSG101	0.0009071	0.00410764	1.31646	Up
P62195	PSMC5	0.00068258	0.00347744	1.31029	Up
P08238	HSP90AB1	0.0172098	0.0379662	1.29607	Up
O60493	SNX3	0.00888051	0.0221983	1.2656	Up
Q16531	DDB1	0.00632377	0.0171986	1.23449	Up
Q8TAT6	NPLOC4	0.0228418	0.0474784	1.2197	Up
O75340	PDCD6	0.00918639	0.0228386	1.21579	Up
P35998	PSMC2	0.00807849	0.0205711	1.19179	Up
Q9UHY1	NRBP1	0.00297409	0.0096435	0.828696	Down
P68400	CSNK2A1	0.0164864	0.0364964	0.816927	Down
Q7L7X3	TAOK1	0.0211966	0.044588	0.772776	Down
P35580	MYH10	0.00752137	0.019435	0.730254	Down
Q12933	TRAF2	0.00152261	0.00570707	0.715954	Down
Q9BZF1	OSBPL8	0.0203054	0.0438937	0.702252	Down
Q3KQU3	MAP7D1	0.0157265	0.0350038	0.698364	Down
Q14318	FKBP8	0.00149806	0.00564217	0.697927	Down
Q9Y2I1	NISCH	0.00182061	0.00660847	0.697183	Down
P35232	PHB1	0.0211966	0.044588	0.694268	Down
Q92574	TSC1	0.00846154	0.0213396	0.693195	Down
P22748	CA4	0.0109402	0.0259362	0.673257	Down
P06753	TPM3	0.00343685	0.0109509	0.672933	Down
Q99471	PFDN5	0.00521265	0.014676	0.667851	Down
Q5U5X0	LYRM7	0.0138247	0.0321121	0.665039	Down
P61106	RAB14	0.000203556	0.00347744	0.663714	Down
P18669	PGAM1	5.46635e-05	0.00159522	0.663474	Down
Q13618	CUL3	0.00228933	0.00807596	0.655968	Down
O75122	CLASP2	0.0109402	0.0259362	0.651284	Down
P06744	GPI	0.00752137	0.019435	0.648182	Down
P49841	GSK3B	0.0139726	0.0323739	0.648075	Down
Q6WCQ1	MPRIP	0.00617592	0.0168097	0.647951	Down
Q9GZY8	MFF	0.0157265	0.0350038	0.647323	Down
Q16643	DBN1	0.00162282	0.0059971	0.643443	Down
Q9NZN5	ARHGEF12	0.0211966	0.044588	0.641797	Down
Q99570	PIK3R4	0.000388806	0.00347744	0.637165	Down
Q9NXR7	BABAM2	0.0200737	0.0434438	0.636266	Down
Q9UHD2	TBK1	0.0143693	0.0332093	0.633251	Down
P0DPI2	GATD3	0.00261042	0.00889978	0.63309	Down
Q9NVI7	ATAD3A	0.000136256	0.00307369	0.62684	Down
Q14203	DCTN1	0.000513634	0.00347744	0.623387	Down
O75534	CSDE1	0.000683761	0.00347744	0.619858	Down
P50897	PPT1	0.0211966	0.044588	0.617539	Down
Q9Y6C9	MTCH2	0.00478633	0.0135902	0.615323	Down
Q6KCM7	SLC25A25	7.59265e-06	0.000370508	0.613615	Down
P30622	CLIP1	0.000102923	0.00257447	0.613295	Down
P43304	GPD2	0.00752137	0.019435	0.610988	Down
P11182	DBT	0.00039404	0.00347744	0.610069	Down
P49757	NUMB	0.0211966	0.044588	0.608937	Down
Q7Z6B0	CCDC91	0.0176923	0.0386999	0.607509	Down
Q13561	DCTN2	0.00135399	0.00521075	0.60632	Down
P04075	ALDOA	3.07781e-11	1.13171e-07	0.605876	Down
Q5JRX3	PITRM1	0.0157265	0.0350038	0.604785	Down
P51452	DUSP3	7.8918e-05	0.00213369	0.603132	Down
Q9BRX8	PRXL2A	8.59781e-05	0.00225815	0.601462	Down
P21359	NF1	0.00160048	0.00592647	0.600034	Down
P42025	ACTR1B	0.00191035	0.00692055	0.600003	Down
P30048	PRDX3	0.00597881	0.0164183	0.595281	Down
O95319	CELF2	0.0027689	0.00899404	0.590945	Down
O75569	PRKRA	0.0157265	0.0350038	0.59056	Down
P27144	AK4	0.0211966	0.044588	0.586504	Down
Q92614	MYO18A	0.000683761	0.00347744	0.585738	Down
Q8IWV7	UBR1	0.000769231	0.00364963	0.582845	Down
P41236	PPP1R2	0.00136752	0.00521075	0.582551	Down
O75381	PEX14	0.0176923	0.0386999	0.582178	Down
Q9ULP9	TBC1D24	0.0211966	0.044588	0.581702	Down
Q15042	RAB3GAP1	0.00136752	0.00521075	0.580233	Down
Q8IXI2	RHOT1	0.00234689	0.00826582	0.577725	Down
Q96S19	METTL26	0.00346528	0.0110128	0.576696	Down
P62820	RAB1A	0.005561	0.0153627	0.574683	Down
Q6PML9	SLC30A9	0.0157265	0.0350038	0.574055	Down
P42858	HTT	0.00776227	0.0199315	0.573861	Down
Q96ME1	FBXL18	4.17961e-06	0.000248995	0.573173	Down
P45954	ACADSB	0.0211966	0.044588	0.569652	Down
P61019	RAB2A	0.00752137	0.019435	0.568441	Down
Q9NSE4	IARS2	0.00752137	0.019435	0.567381	Down
Q8WUW1	BRK1	0.000618653	0.00347744	0.566702	Down
O75116	ROCK2	0.00478633	0.0135902	0.563452	Down
Q676U5	ATG16L1	0.00478633	0.0135902	0.563343	Down
Q15276	RABEP1	0.000683761	0.00347744	0.560627	Down
Q99807	COQ7	0.00956522	0.0236844	0.560411	Down
Q9HA65	TBC1D17	0.0227273	0.0472938	0.559811	Down
Q4G0F5	VPS26B	0.000683761	0.00347744	0.559385	Down
Q9UGV2	NDRG3	0.00380961	0.0119521	0.557297	Down
P61204	ARF3	0.00136752	0.00521075	0.557248	Down
Q6PHR2	ULK3	0.00980392	0.0241778	0.554721	Down
Q16181	SEPTIN7	0.0109402	0.0259362	0.554087	Down
P52943	CRIP2	2.02118e-05	0.000782305	0.553231	Down
P35611	ADD1	0.0211966	0.044588	0.551289	Down
P32189	GK	0.0157265	0.0350038	0.551028	Down
Q96GQ5	RUSF1	0.0211966	0.044588	0.550181	Down
Q3ZCQ8	TIMM50	2.00711e-05	0.000782305	0.550011	Down
P68371	TUBB4B	0.000683761	0.00347744	0.548515	Down
Q9NVA2	SEPTIN11	0.00478633	0.0135902	0.544215	Down
Q9UPT6	MAPK8IP3	1.8754e-06	0.000160369	0.543455	Down
O14924	RGS12	1.03366e-06	0.000108593	0.537496	Down
Q8N335	GPD1L	0.0211966	0.044588	0.533923	Down
P63208	SKP1	0.00155066	0.00576521	0.53136	Down
P01112	HRAS	0.00752137	0.019435	0.530331	Down
Q9Y6G9	DYNC1LI1	0.00634166	0.0172289	0.53005	Down
P22061	PCMT1	0.000683761	0.00347744	0.528526	Down
Q8NC44	RETREG2	2.70174e-07	4.31926e-05	0.526075	Down
Q99623	PHB2	0.00273504	0.00889978	0.524103	Down
Q99653	CHP1	0.0075826	0.0195658	0.523571	Down
O75935	DCTN3	0.0211966	0.044588	0.521263	Down
P61018	RAB4B	0.0111585	0.0264027	0.520877	Down
P49407	ARRB1	0.00312525	0.0100188	0.518367	Down
O95563	MPC2	0.00752137	0.019435	0.518256	Down
O14617	AP3D1	0.000289633	0.00347744	0.518126	Down
Q9BWM7	SFXN3	0.00465889	0.0135902	0.516294	Down
P54920	NAPA	4.65815e-07	6.5877e-05	0.516273	Down
Q15819	UBE2V2	0.00273504	0.00889978	0.515824	Down
Q9NRW1	RAB6B	0.000132503	0.00306784	0.513286	Down
Q9H7Z7	PTGES2	0.00994447	0.0244915	0.511635	Down
Q13885	TUBB2A	3.72129e-05	0.00120028	0.507549	Down
Q96A26	FAM162A	0.00478633	0.0135902	0.506303	Down
Q9Y5S2	CDC42BPB	0.00372465	0.0116956	0.503502	Down
P20338	RAB4A	0.00123396	0.00521075	0.501371	Down
P63104	YWHAZ	0.000193148	0.00347744	0.501151	Down
Q8ND76	CCNY	0.00538461	0.0149428	0.496668	Down
Q9HAR2	ADGRL3	5.55815e-05	0.00160924	0.4966	Down
Q15555	MAPRE2	0.000458285	0.00347744	0.49565	Down
Q96F07	CYFIP2	0.00752137	0.019435	0.494907	Down
Q5T9A4	ATAD3B	0.02	0.0433098	0.494726	Down
P43003	SLC1A3	0.00406434	0.0126435	0.492146	Down
Q99798	ACO2	0.00752137	0.019435	0.491923	Down
Q9GZP4	PITHD1	0.0157265	0.0350038	0.490012	Down
Q16134	ETFDH	0.00478633	0.0135902	0.487121	Down
O75880	SCO1	0.0153289	0.0350038	0.485896	Down
Q5TC12	ATPAF1	0.0142857	0.0330368	0.485581	Down
P18859	ATP5PF	0.00478633	0.0135902	0.485568	Down
P06576	ATP5F1B	0.000683761	0.00347744	0.485242	Down
Q9Y512	SAMM50	0.0024717	0.00864743	0.484856	Down
Q16555	DPYSL2	0.00136752	0.00521075	0.484185	Down
Q9UJW0	DCTN4	0.0157265	0.0350038	0.483875	Down
O43427	FIBP	0.000683761	0.00347744	0.483238	Down
O95219	SNX4	0.00907991	0.0226472	0.483002	Down
Q9BXW6	OSBPL1A	0.0211966	0.044588	0.482793	Down
Q9NZR1	TMOD2	0.0109402	0.0259362	0.482722	Down
P62072	TIMM10	2.53439e-06	0.000185363	0.480986	Down
P01116	KRAS	0.00273504	0.00889978	0.478432	Down
P17612	PRKACA	0.0152876	0.0350038	0.476993	Down
Q9BZV1	UBXN6	0.00557547	0.0153912	0.474141	Down
Q00325	SLC25A3	0.000683761	0.00347744	0.472222	Down
P05141	SLC25A5	0.00273504	0.00889978	0.471107	Down
P30519	HMOX2	0.0231261	0.047916	0.471059	Down
Q86UL8	MAGI2	0.0211966	0.044588	0.469083	Down
P21397	MAOA	0.0157265	0.0350038	0.466769	Down
P13987	CD59	0.00349876	0.0110809	0.466007	Down
Q12959	DLG1	0.0220543	0.0461809	0.465114	Down
Q9NZJ7	MTCH1	0.00478633	0.0135902	0.461372	Down
O00533	CHL1	0.0109402	0.0259362	0.461323	Down
P30084	ECHS1	0.00478633	0.0135902	0.461039	Down
P61981	YWHAG	0.000683761	0.00347744	0.460849	Down
P51808	DYNLT3	4.64971e-05	0.00142475	0.460302	Down
Q16775	HAGH	0.000160565	0.00339308	0.459908	Down
Q01813	PFKP	0.00136752	0.00521075	0.459416	Down
P13591	NCAM1	0.00356522	0.0112526	0.457322	Down
Q96FJ2	DYNLL2	0.00917989	0.0228379	0.456372	Down
Q99767	APBA2	0.00478633	0.0135902	0.454114	Down
Q96CV9	OPTN	0.0160215	0.0355527	0.453266	Down
O60343	TBC1D4	0.00538461	0.0149428	0.452836	Down
Q9H9B4	SFXN1	0.00752137	0.019435	0.452592	Down
Q8TAF3	WDR48	0.0193322	0.0419131	0.451991	Down
O75962	TRIO	0.0211966	0.044588	0.45156	Down
P54646	PRKAA2	0.0124224	0.0290751	0.450759	Down
Q6ZVM7	TOM1L2	0.0102679	0.0252373	0.450418	Down
Q13509	TUBB3	1.17672e-10	2.16341e-07	0.45031	Down
P07919	UQCRH	0.00217538	0.00773586	0.449933	Down
Q16799	RTN1	0.000969417	0.00436297	0.44908	Down
Q9BSF4	TIMM29	0.00842194	0.0213275	0.447632	Down
O95292	VAPB	2.40752e-05	0.000895573	0.447385	Down
Q96PU5	NEDD4L	0.00273504	0.00889978	0.447319	Down
P14415	ATP1B2	0.00478633	0.0135902	0.446652	Down
P68363	TUBA1B	0.0125072	0.0292551	0.445651	Down
P82909	MRPS36	0.00478633	0.0135902	0.444002	Down
Q6P9B6	MEAK7	0.0142857	0.0330368	0.443975	Down
Q00577	PURA	0.0181911	0.0397202	0.443149	Down
Q9UBL0	ARPP21	0.00245098	0.0085831	0.441694	Down
Q8N4C8	MINK1	0.000683761	0.00347744	0.441327	Down
O14495	PLPP3	0.0180689	0.0394767	0.439718	Down
Q15286	RAB35	0.000683761	0.00347744	0.437533	Down
Q05655	PRKCD	0.00538461	0.0149428	0.436414	Down
Q6P9F7	LRRC8B	2.90256e-06	0.000194049	0.433389	Down
Q01082	SPTBN1	5.14181e-05	0.00153711	0.433224	Down
Q13813	SPTAN1	0.000150054	0.00330034	0.429903	Down
Q16891	IMMT	0.0229685	0.047661	0.429439	Down
Q9ULH7	MRTFB	0.0158103	0.0351265	0.428991	Down
Q96T17	MAP7D2	0.00825593	0.0209359	0.426493	Down
Q5TF21	SOGA3	0.000895047	0.00405806	0.426005	Down
Q13423	NNT	0.000683761	0.00347744	0.425484	Down
Q16537	PPP2R5E	3.20819e-09	1.68521e-06	0.423015	Down
Q9NVT9	ARMC1	2.08135e-06	0.000170069	0.422756	Down
P55196	AFDN	0.00136752	0.00521075	0.42259	Down
Q9UQ16	DNM3	0.0110311	0.0261349	0.421237	Down
O75110	ATP9A	0.00273504	0.00889978	0.420797	Down
Q8NBN7	RDH13	0.00478633	0.0135902	0.419377	Down
P40925	MDH1	0.000683761	0.00347744	0.418816	Down
Q7Z4S6	KIF21A	2.08632e-10	2.55713e-07	0.41872	Down
Q5HYK3	COQ5	0.0157265	0.0350038	0.416733	Down
Q8TBX8	PIP4K2C	0.00273504	0.00889978	0.416458	Down
Q12974	PTP4A2	0.00307692	0.00987247	0.414365	Down
P21796	VDAC1	0.00225882	0.00799391	0.413812	Down
Q3SXM5	HSDL1	0.00273504	0.00889978	0.413756	Down
Q14254	FLOT2	0.00136752	0.00521075	0.412012	Down
P31040	SDHA	0.00142763	0.00542852	0.411757	Down
Q96GZ6	SLC41A3	0.000135136	0.00307369	0.411058	Down
Q13362	PPP2R5C	0.000869565	0.00395717	0.410391	Down
Q4J6C6	PREPL	0.00136752	0.00521075	0.410287	Down
Q9BPX5	ARPC5L	0.0153641	0.0350038	0.410206	Down
Q9NYB9	ABI2	0.0115558	0.0272551	0.409356	Down
P40926	MDH2	0.000683761	0.00347744	0.40814	Down
O75947	ATP5PD	0.000683761	0.00347744	0.407487	Down
O60262	GNG7	0.0211966	0.044588	0.406189	Down
Q7Z6L1	TECPR1	0.00837464	0.0212223	0.404663	Down
O14807	MRAS	0.00752137	0.019435	0.40355	Down
Q13363	CTBP1	6.49699e-06	0.000341278	0.403319	Down
Q96C19	EFHD2	0.00273504	0.00889978	0.402764	Down
P45880	VDAC2	0.000683761	0.00347744	0.402156	Down
Q8NBM8	PCYOX1L	0.00790514	0.0201856	0.400557	Down
P09622	DLD	0.00136752	0.00521075	0.398917	Down
O95721	SNAP29	0.00136752	0.00521075	0.397691	Down
Q5TH69	ARFGEF3	0.0238461	0.0491493	0.391706	Down
P27448	MARK3	0.00478633	0.0135902	0.39067	Down
O15126	SCAMP1	0.00478633	0.0135902	0.390427	Down
O14521	SDHD	0.00307692	0.00987247	0.390087	Down
P56134	ATP5MF	0.00136752	0.00521075	0.388695	Down
Q9UKU0	ACSL6	0.0211966	0.044588	0.38858	Down
P09936	UCHL1	0.000683761	0.00347744	0.387704	Down
O75964	ATP5MG	0.001765	0.00642564	0.386886	Down
Q00610	CLTC	1.88476e-05	0.000753289	0.386364	Down
Q8N2F6	ARMC10	0.00148775	0.00562804	0.385305	Down
Q4KMP7	TBC1D10B	0.0215954	0.0452716	0.384243	Down
Q02978	SLC25A11	0.000683761	0.00347744	0.381499	Down
Q00535	CDK5	6.70185e-06	0.00034708	0.381458	Down
Q12979	ABR	0.000683761	0.00347744	0.38131	Down
Q92823	NRCAM	0.00943004	0.0234127	0.380547	Down
P04350	TUBB4A	0.00273504	0.00889978	0.379022	Down
Q6VY07	PACS1	0.00887735	0.0221983	0.378966	Down
Q14168	MPP2	0.00273504	0.00889978	0.378241	Down
P78356	PIP4K2B	0.000683761	0.00347744	0.377929	Down
O95202	LETM1	0.004678	0.0135902	0.377897	Down
Q9Y4W6	AFG3L2	0.0159563	0.0354295	0.375845	Down
O95140	MFN2	0.0124031	0.029067	0.374363	Down
Q96BQ5	CCDC127	0.00136752	0.00521075	0.372125	Down
Q6P1M0	SLC27A4	0.000683761	0.00347744	0.372012	Down
Q8IVF2	AHNAK2	0.0157265	0.0350038	0.370202	Down
Q9Y4G6	TLN2	0.0014398	0.00546914	0.36948	Down
Q6ZT12	UBR3	0.00225861	0.00799391	0.368549	Down
Q99447	PCYT2	0.000199467	0.00347744	0.36661	Down
O94826	TOMM70	0.000555972	0.00347744	0.366151	Down
P03928	MT-ATP8	0.0176923	0.0386999	0.36517	Down
Q14155	ARHGEF7	0.0153324	0.0350038	0.365149	Down
Q8IU85	CAMK1D	0.000683761	0.00347744	0.363703	Down
P53041	PPP5C	0.00201424	0.00726825	0.362211	Down
P36957	DLST	0.00273504	0.00889978	0.361813	Down
Q9BZ29	DOCK9	0.00956522	0.0236844	0.361344	Down
Q6P4F2	FDX2	0.000988142	0.00436707	0.361273	Down
Q02218	OGDH	0.00321657	0.0102936	0.360179	Down
P21912	SDHB	0.000274897	0.00347744	0.359105	Down
O15085	ARHGEF11	0.000769231	0.00364963	0.35711	Down
Q99685	MGLL	0.00273504	0.00889978	0.356603	Down
Q9Y2Z9	COQ6	0.0158103	0.0351265	0.356102	Down
O95197	RTN3	0.0213056	0.0447661	0.354921	Down
Q9Y6I3	EPN1	0.0101007	0.0248596	0.354768	Down
Q92598	HSPH1	0.000683761	0.00347744	0.35464	Down
Q9H492	MAP1LC3A	0.00903331	0.0225649	0.353097	Down
Q96DA2	RAB39B	0.000803074	0.0037955	0.352702	Down
Q9NZC3	GDE1	0.00451722	0.0135902	0.352391	Down
Q5H9L2	TCEAL5	0.00147772	0.00559587	0.351835	Down
O15530	PDPK1	0.00846154	0.0213396	0.351019	Down
O15394	NCAM2	0.00478633	0.0135902	0.349966	Down
P00492	HPRT1	0.00273504	0.00889978	0.34957	Down
P24539	ATP5PB	0.000683761	0.00347744	0.34884	Down
P50993	ATP1A2	0.00478633	0.0135902	0.347559	Down
P62873	GNB1	1.37653e-08	5.62389e-06	0.347214	Down
Q02750	MAP2K1	0.000683761	0.00347744	0.346769	Down
Q4V328	GRIPAP1	0.000683761	0.00347744	0.346438	Down
Q9BXM9	FSD1L	0.00153846	0.00572563	0.345073	Down
Q9Y277	VDAC3	0.000683761	0.00347744	0.344956	Down
O00429	DNM1L	0.000683761	0.00347744	0.343739	Down
Q9Y697	NFS1	0.000529353	0.00347744	0.342053	Down
P12235	SLC25A4	0.000683761	0.00347744	0.341942	Down
P50213	IDH3A	0.000278995	0.00347744	0.341212	Down
Q8IYB4	PEX5L	0.0144479	0.033328	0.339916	Down
Q9BRK0	REEP2	0.0136739	0.0318423	0.339684	Down
Q86Y39	NDUFA11	3.57962e-05	0.0011752	0.339253	Down
O94973	AP2A2	0.000135537	0.00307369	0.339116	Down
P07311	ACYP1	0.000769231	0.00364963	0.338583	Down
Q9UDW1	UQCR10	0.00608696	0.016616	0.33818	Down
Q13526	PIN1	0.00068006	0.00347744	0.337829	Down
Q9Y2X7	GIT1	2.67388e-05	0.000963907	0.337791	Down
Q8WY54	PPM1E	0.00538461	0.0149428	0.337764	Down
Q9Y2I8	WDR37	0.000683761	0.00347744	0.337283	Down
O60313	OPA1	0.000683761	0.00347744	0.336601	Down
P48047	ATP5PO	0.000683761	0.00347744	0.336072	Down
O43236	SEPTIN4	0.0157265	0.0350038	0.335501	Down
Q09019	DMWD	0.00173913	0.00639334	0.334801	Down
O00499	BIN1	0.00478633	0.0135902	0.334732	Down
Q96RL7	VPS13A	0.00541152	0.0149948	0.334351	Down
Q9UH03	SEPTIN3	0.000683761	0.00347744	0.33353	Down
P63010	AP2B1	0.000683761	0.00347744	0.333063	Down
Q01968	OCRL	0.00538461	0.0149428	0.331261	Down
P49840	GSK3A	0.000683761	0.00347744	0.330924	Down
P53680	AP2S1	0.000683761	0.00347744	0.330286	Down
O95782	AP2A1	0.000683761	0.00347744	0.32748	Down
P11177	PDHB	0.000683761	0.00347744	0.326514	Down
O43295	SRGAP3	0.00136752	0.00521075	0.325207	Down
Q8NHG7	SVIP	0.02	0.0433098	0.324755	Down
P16870	CPE	0.00478633	0.0135902	0.324395	Down
P10515	DLAT	0.0139171	0.0322858	0.324383	Down
P16949	STMN1	0.0033205	0.0105985	0.324366	Down
O43837	IDH3B	0.000683761	0.00347744	0.323952	Down
P23634	ATP2B4	0.0146607	0.0337804	0.323032	Down
P31930	UQCRC1	0.000143488	0.00319761	0.322364	Down
P09104	ENO2	2.74766e-06	0.000193325	0.321432	Down
Q9NQE9	HINT3	0.00136752	0.00521075	0.321071	Down
O75914	PAK3	0.000683761	0.00347744	0.320813	Down
P15104	GLUL	0.000683761	0.00347744	0.319924	Down
P42356	PI4KA	0.00876066	0.0219734	0.319483	Down
P36542	ATP5F1C	0.000683761	0.00347744	0.31848	Down
Q86UX6	STK32C	0.0109402	0.0259362	0.318392	Down
P23468	PTPRD	0.00273504	0.00889978	0.31588	Down
Q92581	SLC9A6	0.00790514	0.0201856	0.314419	Down
Q8NFH8	REPS2	0.0025974	0.00889978	0.314118	Down
P47985	UQCRFS1	0.000683761	0.00347744	0.313282	Down
Q9H1K1	ISCU	0.00273504	0.00889978	0.313227	Down
P33402	GUCY1A2	0.00395257	0.0123166	0.312584	Down
Q96MM6	HSPA12B	0.00538461	0.0149428	0.312155	Down
P55809	OXCT1	0.00478633	0.0135902	0.31213	Down
Q9BY67	CADM1	0.00478633	0.0135902	0.311365	Down
Q96F85	CNRIP1	0.00273504	0.00889978	0.311305	Down
Q14643	ITPR1	0.00273504	0.00889978	0.309158	Down
Q02153	GUCY1B1	0.00136752	0.00521075	0.309087	Down
P51674	GPM6A	0.0109402	0.0259362	0.308014	Down
Q9BV79	MECR	0.00395257	0.0123166	0.307584	Down
O75170	PPP6R2	0.000769231	0.00364963	0.305683	Down
Q08495	DMTN	0.00273504	0.00889978	0.304576	Down
Q08174	PCDH1	0.00752137	0.019435	0.304057	Down
Q969M1	TOMM40L	0.00225861	0.00799391	0.303488	Down
P53779	MAPK10	0.00643447	0.017448	0.302542	Down
Q9Y3S1	WNK2	0.0171569	0.0378894	0.30253	Down
P10636	MAPT	0.00755196	0.0195004	0.301976	Down
Q9NXA8	SIRT5	0.00395257	0.0123166	0.301603	Down
P25098	GRK2	0.00538461	0.0149428	0.300334	Down
Q6PI78	TMEM65	0.00451722	0.0135902	0.298924	Down
P12236	SLC25A6	0.0240677	0.0495503	0.298103	Down
P10606	COX5B	0.000683761	0.00347744	0.297785	Down
Q96CW1	AP2M1	0.00599764	0.0164454	0.296859	Down
Q9BSH5	HDHD3	0.0011293	0.00483969	0.296589	Down
P53365	ARFIP2	0.000683761	0.00347744	0.296374	Down
Q9P032	NDUFAF4	0.00846154	0.0213396	0.296254	Down
Q9NQX5	NPDC1	0.0144479	0.033328	0.294919	Down
Q96GD0	PDXP	0.000683761	0.00347744	0.29455	Down
Q96PE3	INPP4A	0.000683761	0.00347744	0.29421	Down
Q9BPW8	NIPSNAP1	0.00074367	0.00364963	0.294	Down
Q13153	PAK1	0.000683761	0.00347744	0.292573	Down
O75746	SLC25A12	0.000683761	0.00347744	0.292528	Down
Q96EQ0	SGTB	9.08254e-05	0.00235187	0.29052	Down
P51553	IDH3G	6.46228e-05	0.00177327	0.289981	Down
P60520	GABARAPL2	0.000683761	0.00347744	0.289762	Down
P08559	PDHA1	0.000683761	0.00347744	0.2896	Down
O14949	UQCRQ	0.000683761	0.00347744	0.289258	Down
Q96IX5	ATP5MK	0.000683761	0.00347744	0.28853	Down
Q9P2R7	SUCLA2	0.000784559	0.00371277	0.287382	Down
P11169	SLC2A3	0.000683761	0.00347744	0.287322	Down
O15294	OGT	0.00824317	0.0209324	0.287201	Down
Q99435	NELL2	0.00519481	0.014637	0.287075	Down
P11137	MAP2	0.000683761	0.00347744	0.285305	Down
P19634	SLC9A1	0.0011293	0.00483969	0.285227	Down
Q9UPY8	MAPRE3	0.000683761	0.00347744	0.284467	Down
O96000	NDUFB10	0.00547654	0.0151522	0.283748	Down
Q9NQC7	CYLD	0.00175439	0.00639334	0.283527	Down
P56385	ATP5ME	0.00173913	0.00639334	0.283508	Down
Q9BUR5	APOO	0.00460965	0.0135902	0.283237	Down
Q16864	ATP6V1F	0.00136752	0.00521075	0.283169	Down
Q16718	NDUFA5	0.00599304	0.0164451	0.28307	Down
Q96D09	GPRASP2	0.00300752	0.00972616	0.282216	Down
P61925	PKIA	0.0086003	0.021645	0.28204	Down
P78559	MAP1A	0.000683761	0.00347744	0.281228	Down
Q9UBB6	NCDN	0.000683761	0.00347744	0.279479	Down
O95248	SBF1	0.000683761	0.00347744	0.279464	Down
Q9H1Z4	WDR13	0.0174227	0.0383842	0.278911	Down
P31321	PRKAR1B	0.00150376	0.00564217	0.278715	Down
Q9NZN3	EHD3	0.000683761	0.00347744	0.278577	Down
O00217	NDUFS8	0.000683761	0.00347744	0.277662	Down
P13073	COX4I1	0.00304908	0.0098519	0.27761	Down
P49758	RGS6	0.00206398	0.00735394	0.27705	Down
O75489	NDUFS3	0.000683761	0.00347744	0.277004	Down
Q96MZ0	GDAP1L1	0.00136752	0.00521075	0.276051	Down
O75251	NDUFS7	0.000769231	0.00364963	0.274888	Down
O75306	NDUFS2	0.0114421	0.0270215	0.272707	Down
Q2M2I8	AAK1	0.00873161	0.0219304	0.272365	Down
Q99747	NAPG	0.000683761	0.00347744	0.272066	Down
O95298	NDUFC2	0.000683761	0.00347744	0.271721	Down
Q9NV96	TMEM30A	0.0139654	0.0323739	0.271582	Down
P23515	OMG	0.0123077	0.0288803	0.271499	Down
P51970	NDUFA8	0.0104902	0.0257149	0.270704	Down
Q9GZV7	HAPLN2	0.0123077	0.0288803	0.268829	Down
P78357	CNTNAP1	0.00478633	0.0135902	0.268196	Down
P52799	EFNB2	0.00347826	0.0110255	0.267865	Down
P38606	ATP6V1A	0.000683761	0.00347744	0.267803	Down
P13521	SCG2	0.0109402	0.0259362	0.267766	Down
O95299	NDUFA10	0.000683761	0.00347744	0.267329	Down
O75334	PPFIA2	0.000973857	0.00436707	0.267218	Down
Q3ZCW2	LGALSL	0.000683761	0.00347744	0.267056	Down
Q5SQN1	SNAP47	0.00395257	0.0123166	0.26612	Down
Q13555	CAMK2G	0.000683761	0.00347744	0.266016	Down
Q6P1Q0	LETMD1	0.000869565	0.00395717	0.265635	Down
Q9P121	NTM	0.000683761	0.00347744	0.264763	Down
P20674	COX5A	0.00726095	0.019435	0.263715	Down
Q8NFX7	STXBP6	0.00300752	0.00972616	0.262802	Down
Q9Y5K8	ATP6V1D	0.000683761	0.00347744	0.261872	Down
Q96ID5	IGSF21	0.000683761	0.00347744	0.261568	Down
P62745	RHOB	0.000683761	0.00347744	0.261388	Down
Q13367	AP3B2	0.000683761	0.00347744	0.261133	Down
Q9ULP0	NDRG4	0.000683761	0.00347744	0.259202	Down
Q16795	NDUFA9	0.000683761	0.00347744	0.258322	Down
P04156	PRNP	0.000683761	0.00347744	0.258115	Down
O95168	NDUFB4	0.00324623	0.0103795	0.257644	Down
P55327	TPD52	0.00153846	0.00572563	0.257267	Down
Q8N6N7	ACBD7	0.0192982	0.0418641	0.257128	Down
Q9Y243	AKT3	0.0011293	0.00483969	0.256956	Down
Q15223	NECTIN1	0.00136752	0.00521075	0.25683	Down
Q8IXS6	PALM2	0.00136752	0.00521075	0.256553	Down
Q5JTJ3	COA6	0.000769231	0.00364963	0.25503	Down
Q9NQ66	PLCB1	0.000683761	0.00347744	0.253628	Down
P10114	RAP2A	0.0240601	0.0495503	0.252878	Down
Q68D91	MBLAC2	0.000683761	0.00347744	0.252844	Down
O94967	WDR47	0.00015794	0.00338605	0.252198	Down
Q01484	ANK2	0.00458626	0.0135902	0.251692	Down
P21283	ATP6V1C1	0.000683761	0.00347744	0.250945	Down
P25686	DNAJB2	0.00273504	0.00889978	0.249721	Down
P09497	CLTB	0.000683761	0.00347744	0.24783	Down
Q16620	NTRK2	0.000683761	0.00347744	0.247303	Down
Q9P0L2	MARK1	0.0146686	0.0337804	0.246927	Down
O43678	NDUFA2	0.000769231	0.00364963	0.246419	Down
Q9H6U6	BCAS3	0.000683761	0.00347744	0.245987	Down
P56556	NDUFA6	0.000683761	0.00347744	0.245761	Down
Q9P260	RELCH	0.000683761	0.00347744	0.244857	Down
O43426	SYNJ1	0.000683761	0.00347744	0.244512	Down
Q9H3Z4	DNAJC5	0.000683761	0.00347744	0.24424	Down
O95670	ATP6V1G2	0.000683761	0.00347744	0.244154	Down
O43181	NDUFS4	0.0134094	0.0313055	0.244073	Down
Q14141	SEPTIN6	0.000683761	0.00347744	0.243513	Down
Q6P995	FAM171B	0.000988142	0.00436707	0.243291	Down
P03886	MT-ND1	0.00436772	0.0134732	0.242962	Down
Q6ZVL6	KIAA1549L	0.0140196	0.0324622	0.242409	Down
P36543	ATP6V1E1	0.000683761	0.00347744	0.241867	Down
Q9UI12	ATP6V1H	0.000683761	0.00347744	0.241805	Down
P09669	COX6C	0.000683761	0.00347744	0.241789	Down
Q9UI09	NDUFA12	0.0213675	0.0448449	0.241725	Down
Q9NZ72	STMN3	0.00395257	0.0123166	0.24106	Down
P49821	NDUFV1	0.00939522	0.023342	0.240979	Down
Q12860	CNTN1	0.000683761	0.00347744	0.240447	Down
Q05329	GAD2	0.0123077	0.0288803	0.240241	Down
P30531	SLC6A1	0.00790514	0.0201856	0.240085	Down
Q13449	LSAMP	0.000113013	0.00275199	0.23826	Down
P17174	GOT1	0.00136752	0.00521075	0.237764	Down
Q16849	PTPRN	0.0227038	0.0472938	0.237706	Down
Q9P1Z2	CALCOCO1	0.000869565	0.00395717	0.237659	Down
P15954	COX7C	0.000683761	0.00347744	0.237114	Down
P61601	NCALD	0.00273504	0.00889978	0.236979	Down
O43674	NDUFB5	0.000769231	0.00364963	0.236444	Down
Q96HS1	PGAM5	0.000683761	0.00347744	0.236225	Down
Q9UQ90	SPG7	0.00136752	0.00521075	0.235657	Down
O14576	DYNC1I1	0.000683761	0.00347744	0.235558	Down
Q7RTP6	MICAL3	0.00225861	0.00799391	0.234517	Down
Q9NP81	SARS2	0.0167495	0.0370343	0.233222	Down
O14525	ASTN1	0.00153846	0.00572563	0.233031	Down
Q8N3J6	CADM2	0.000683761	0.00347744	0.232939	Down
P37235	HPCAL1	0.0218062	0.0456874	0.232715	Down
Q8NE86	MCU	0.000769231	0.00364963	0.232072	Down
O60861	GAS7	0.00718043	0.0192859	0.230635	Down
Q9Y6R0	NUMBL	0.000683761	0.00347744	0.230616	Down
Q9H4G0	EPB41L1	0.00542459	0.0150197	0.230115	Down
Q14642	INPP5A	0.00347826	0.0110255	0.230075	Down
Q9P0J0	NDUFA13	0.000683761	0.00347744	0.229805	Down
Q9NZQ3	NCKIPSD	0.00957739	0.0236985	0.228585	Down
Q9ULJ8	PPP1R9A	1.32041e-08	5.62389e-06	0.228033	Down
P84074	HPCA	0.0137352	0.0319648	0.227217	Down
Q96HD1	CRELD1	0.0118614	0.0279579	0.226696	Down
P19367	HK1	0.000683761	0.00347744	0.225625	Down
O43920	NDUFS5	0.000683761	0.00347744	0.22528	Down
P21281	ATP6V1B2	0.000683761	0.00347744	0.224943	Down
P05023	ATP1A1	0.000683761	0.00347744	0.224195	Down
Q9NR46	SH3GLB2	0.000683761	0.00347744	0.220733	Down
P46459	NSF	0.000683761	0.00347744	0.220272	Down
Q02338	BDH1	0.00615697	0.0167822	0.220016	Down
Q8WXF7	ATL1	0.000683761	0.00347744	0.219572	Down
Q96GY0	ZC2HC1A	0.0182968	0.0399272	0.219431	Down
Q8TC26	TMEM163	0.00790514	0.0201856	0.218708	Down
P00505	GOT2	0.00136752	0.00521075	0.218669	Down
Q5VWJ9	SNX30	0.00350877	0.0111031	0.218524	Down
O75380	NDUFS6	0.000683761	0.00347744	0.217238	Down
P28331	NDUFS1	0.000683761	0.00347744	0.217235	Down
Q9HCH3	CPNE5	0.00273504	0.00889978	0.21708	Down
Q9UK17	KCND3	0.00701754	0.0189037	0.215805	Down
P63098	PPP3R1	0.00478633	0.0135902	0.215467	Down
Q8TB36	GDAP1	0.000683761	0.00347744	0.215446	Down
O75335	PPFIA4	0.00490196	0.0138864	0.215428	Down
Q86UW8	HAPLN4	0.00300752	0.00972616	0.214885	Down
O00330	PDHX	0.000683761	0.00347744	0.214468	Down
Q9Y2J2	EPB41L3	0.000683761	0.00347744	0.213519	Down
P31323	PRKAR2B	0.00540013	0.0149746	0.213009	Down
P43004	SLC1A2	0.00273504	0.00889978	0.212758	Down
Q15904	ATP6AP1	0.000683761	0.00347744	0.212573	Down
Q6PIU2	NCEH1	0.00422134	0.0130326	0.211421	Down
O75781	PALM	0.000683761	0.00347744	0.211381	Down
P41217	CD200	0.00701754	0.0189037	0.209998	Down
P80723	BASP1	0.000683761	0.00347744	0.209199	Down
Q9H0R8	GABARAPL1	0.000683761	0.00347744	0.209185	Down
P19086	GNAZ	0.000683761	0.00347744	0.209101	Down
Q7Z2K8	GPRIN1	0.000683761	0.00347744	0.208969	Down
P40123	CAP2	0.0155436	0.0350038	0.208655	Down
Q9NZ45	CISD1	0.000683761	0.00347744	0.208638	Down
P09471	GNAO1	0.000683761	0.00347744	0.207859	Down
O95182	NDUFA7	0.000683761	0.00347744	0.207649	Down
Q15773	MLF2	0.000683761	0.00347744	0.20737	Down
P12074	COX6A1	0.000769231	0.00364963	0.207136	Down
Q9H254	SPTBN4	0.000683761	0.00347744	0.206416	Down
P59768	GNG2	0.000683761	0.00347744	0.206194	Down
Q86UY8	NT5DC3	0.00478633	0.0135902	0.206168	Down
O43301	HSPA12A	0.000683761	0.00347744	0.206054	Down
O94811	TPPP	0.000683761	0.00347744	0.206044	Down
Q16798	ME3	0.000683761	0.00347744	0.205896	Down
P35612	ADD2	0.0183478	0.0400092	0.204971	Down
Q8NDA8	MROH1	0.00173913	0.00639334	0.20446	Down
Q02246	CNTN2	0.00519481	0.014637	0.202226	Down
Q9BWQ8	FAIM2	0.000869565	0.00395717	0.201902	Down
Q9Y6M9	NDUFB9	0.00345182	0.0109795	0.201415	Down
Q9UJC5	SH3BGRL2	0.00909091	0.0226472	0.201076	Down
Q9BXF6	RAB11FIP5	0.000769231	0.00364963	0.20018	Down
O14523	C2CD2L	0.00490196	0.0138864	0.199816	Down
O00562	PITPNM1	0.00175439	0.00639334	0.1991	Down
Q9BRQ6	CHCHD6	0.000683761	0.00347744	0.198721	Down
P14854	COX6B1	0.000683761	0.00347744	0.197413	Down
Q9Y4I1	MYO5A	0.000683761	0.00347744	0.197304	Down
Q08209	PPP3CA	0.000683761	0.00347744	0.196676	Down
O94856	NFASC	0.000683761	0.00347744	0.19501	Down
Q9Y6N8	CDH10	0.0011293	0.00483969	0.194718	Down
Q86UN3	RTN4RL2	0.00412797	0.0128089	0.193621	Down
Q9Y6T7	DGKB	0.000988142	0.00436707	0.193331	Down
O75899	GABBR2	0.000869565	0.00395717	0.193248	Down
P60763	RAC3	0.00175439	0.00639334	0.191083	Down
Q13332	PTPRS	0.00451722	0.0135902	0.190099	Down
P45985	MAP2K4	0.000683761	0.00347744	0.189516	Down
O60331	PIP5K1C	0.000683761	0.00347744	0.189296	Down
Q6NV74	CRACDL	0.000869565	0.00395717	0.188886	Down
P17568	NDUFB7	0.000984501	0.00436707	0.188831	Down
Q99719	SEPTIN5	0.000683761	0.00347744	0.187083	Down
Q5T5P2	KIAA1217	0.00175439	0.00639334	0.187063	Down
Q86WG3	ATCAY	0.000769231	0.00364963	0.186889	Down
Q8N111	CEND1	0.000683761	0.00347744	0.186274	Down
Q9HC56	PCDH9	0.00136752	0.00521075	0.184725	Down
O95294	RASAL1	0.0124224	0.0290751	0.182236	Down
Q9Y4D1	DAAM1	0.0011293	0.00483969	0.182128	Down
Q92558	WASF1	0.00344938	0.0109795	0.18192	Down
P62760	VSNL1	0.000683761	0.00347744	0.181868	Down
Q99962	SH3GL2	0.000683761	0.00347744	0.181555	Down
Q9NQ86	TRIM36	0.000769231	0.00364963	0.181208	Down
P62166	NCS1	0.00909091	0.0226472	0.181188	Down
Q9UNA1	ARHGAP26	0.000869565	0.00395717	0.181183	Down
Q9C0H9	SRCIN1	0.000683761	0.00347744	0.180944	Down
Q9UPW8	UNC13A	0.0063443	0.0172289	0.180753	Down
Q9Y4E6	WDR7	0.000683761	0.00347744	0.180695	Down
Q5SYC1	CLVS2	0.00206398	0.00735394	0.180158	Down
P05408	SCG5	0.006917	0.0186739	0.179828	Down
Q9NQR7	CCDC177	0.00206398	0.00735394	0.178465	Down
P53677	AP3M2	0.000683761	0.00347744	0.178119	Down
P13637	ATP1A3	0.000683761	0.00347744	0.177767	Down
Q9UI15	TAGLN3	0.000683761	0.00347744	0.177327	Down
O15020	SPTBN2	0.000683761	0.00347744	0.176248	Down
Q9HCD6	TANC2	0.000988142	0.00436707	0.176227	Down
Q8IZD9	DOCK3	0.0012987	0.00521075	0.175421	Down
Q6DN90	IQSEC1	0.000683761	0.00347744	0.173653	Down
P61421	ATP6V0D1	0.000683761	0.00347744	0.172982	Down
Q96G97	BSCL2	0.000869565	0.00395717	0.172927	Down
O94772	LY6H	0.00153846	0.00572563	0.171149	Down
P63096	GNAI1	0.000683761	0.00347744	0.170103	Down
Q8N126	CADM3	0.000683761	0.00347744	0.168297	Down
Q5T848	GPR158	0.0025974	0.00889978	0.167895	Down
Q8NC96	NECAP1	0.000769231	0.00364963	0.16767	Down
Q99490	AGAP2	0.00412797	0.0128089	0.1673	Down
P04216	THY1	0.000683761	0.00347744	0.167116	Down
O60641	SNAP91	0.000683761	0.00347744	0.164797	Down
Q8N987	NECAB1	0.0012987	0.00521075	0.16368	Down
P54750	PDE1A	0.00150376	0.00564217	0.163314	Down
O75382	TRIM3	0.00825593	0.0209359	0.162312	Down
P60880	SNAP25	0.000683761	0.00347744	0.161134	Down
Q05193	DNM1	0.000683761	0.00347744	0.161094	Down
O95169	NDUFB8	0.00967804	0.0239315	0.160639	Down
Q13574	DGKZ	0.000683761	0.00347744	0.159706	Down
Q8IXS8	FAM126B	0.00245098	0.0085831	0.159532	Down
Q9H115	NAPB	0.000683761	0.00347744	0.159114	Down
P49418	AMPH	0.000683761	0.00347744	0.158904	Down
Q9Y639	NPTN	0.000683761	0.00347744	0.158882	Down
P42658	DPP6	0.000683761	0.00347744	0.15792	Down
O14775	GNB5	0.00227026	0.00801897	0.157537	Down
Q12955	ANK3	0.000683761	0.00347744	0.157412	Down
P32418	SLC8A1	0.000683761	0.00347744	0.157309	Down
P20020	ATP2B1	0.000683761	0.00347744	0.155949	Down
Q9ULU8	CADPS	0.000683761	0.00347744	0.15535	Down
Q9Y2G0	EFR3B	0.000769231	0.00364963	0.155106	Down
P54289	CACNA2D1	0.000683761	0.00347744	0.155038	Down
P47736	RAP1GAP	0.000869565	0.00395717	0.154539	Down
Q96JE9	MAP6	0.000683761	0.00347744	0.154282	Down
Q00975	CACNA1B	0.00206398	0.00735394	0.153517	Down
Q93050	ATP6V0A1	0.000683761	0.00347744	0.153097	Down
Q8IWQ3	BRSK2	0.00245098	0.0085831	0.153051	Down
Q9HCM2	PLXNA4	0.000683761	0.00347744	0.153038	Down
O75689	ADAP1	0.000683761	0.00347744	0.152601	Down
Q9UBS5	GABBR1	0.000683761	0.00347744	0.152016	Down
Q9GZN7	ROGDI	0.000683761	0.00347744	0.151168	Down
Q9Y2T3	GDA	0.000683761	0.00347744	0.150062	Down
Q9UQB8	BAIAP2	0.000683761	0.00347744	0.149957	Down
O95741	CPNE6	0.00136752	0.00521075	0.149933	Down
P05026	ATP1B1	0.000683761	0.00347744	0.149633	Down
Q14894	CRYM	0.000683761	0.00347744	0.148437	Down
P68366	TUBA4A	0.000769231	0.00364963	0.148074	Down
Q8WXD9	CASKIN1	0.000683761	0.00347744	0.145999	Down
Q92777	SYN2	0.000769231	0.00364963	0.145858	Down
O15079	SNPH	0.000869565	0.00395717	0.145122	Down
P78324	SIRPA	0.000683761	0.00347744	0.145097	Down
Q9UIW2	PLXNA1	0.000683761	0.00347744	0.14476	Down
Q9ULB1	NRXN1	0.000988142	0.00436707	0.142864	Down
Q13303	KCNAB2	0.000683761	0.00347744	0.139824	Down
Q92932	PTPRN2	0.00206398	0.00735394	0.139272	Down
Q9UFN0	NIPSNAP3A	0.00153846	0.00572563	0.139197	Down
Q9P0K1	ADAM22	0.000683761	0.00347744	0.13835	Down
Q8NFP9	NBEA	0.000683761	0.00347744	0.138257	Down
P17600	SYN1	0.000683761	0.00347744	0.137384	Down
P61266	STX1B	0.000683761	0.00347744	0.137308	Down
Q9Y2Q0	ATP8A1	0.000683761	0.00347744	0.137123	Down
P61764	STXBP1	0.000683761	0.00347744	0.1368	Down
Q16143	SNCB	0.00150376	0.00564217	0.136746	Down
Q14289	PTK2B	0.000769231	0.00364963	0.13658	Down
P12532	CKMT1A	0.000683761	0.00347744	0.136054	Down
Q9H1V8	SLC6A17	0.00136752	0.00521075	0.135579	Down
P37840	SNCA	0.000683761	0.00347744	0.134996	Down
Q9BR01	SULT4A1	0.00701754	0.0189037	0.134386	Down
O75145	PPFIA3	0.000683761	0.00347744	0.1343	Down
Q15119	PDK2	0.00175439	0.00639334	0.133696	Down
Q8N573	OXR1	0.000683761	0.00347744	0.129656	Down
Q15700	DLG2	0.000683761	0.00347744	0.12917	Down
Q92854	SEMA4D	0.0012987	0.00521075	0.12864	Down
Q9UM19	HPCAL4	0.000988142	0.00436707	0.128309	Down
Q9C0D0	PHACTR1	0.000683761	0.00347744	0.126927	Down
Q5T0D9	TPRG1L	0.00175439	0.00639334	0.126794	Down
O94875	SORBS2	0.000683761	0.00347744	0.126258	Down
O00483	NDUFA4	0.000683761	0.00347744	0.126217	Down
Q92686	NRGN	0.000869565	0.00395717	0.125984	Down
O95139	NDUFB6	0.000683761	0.00347744	0.125743	Down
P16298	PPP3CB	0.000683761	0.00347744	0.125473	Down
Q9UI40	SLC24A2	0.0011293	0.00483969	0.122553	Down
Q92561	PHYHIP	0.000869565	0.00395717	0.122471	Down
O94925	GLS	0.000683761	0.00347744	0.120907	Down
Q86XD5	FAM131B	0.00206398	0.00735394	0.119646	Down
O14490	DLGAP1	0.000988142	0.00436707	0.119597	Down
P42262	GRIA2	0.00761007	0.0195954	0.118621	Down
Q86TV6	TTC7B	0.000683761	0.00347744	0.117938	Down
Q13554	CAMK2B	0.000683761	0.00347744	0.117866	Down
Q8NI08	NCOA7	0.000769231	0.00364963	0.11761	Down
Q86UR5	RIMS1	0.000869565	0.00395717	0.117505	Down
O76070	SNCG	0.000683761	0.00347744	0.116315	Down
Q01814	ATP2B2	0.000683761	0.00347744	0.116262	Down
Q13825	AUH	0.000869565	0.00395717	0.116205	Down
Q969P0	IGSF8	0.000683761	0.00347744	0.115432	Down
Q16623	STX1A	0.000683761	0.00347744	0.115126	Down
Q9UHG2	PCSK1N	0.000683761	0.00347744	0.114835	Down
O60939	SCN2B	0.00206398	0.00735394	0.114439	Down
Q9NY65	TUBA8	0.00150376	0.00564217	0.11342	Down
Q92796	DLG3	0.000683761	0.00347744	0.112867	Down
O75077	ADAM23	0.000988142	0.00436707	0.111706	Down
P20336	RAB3A	0.000683761	0.00347744	0.110205	Down
Q12791	KCNMA1	0.00206398	0.00735394	0.109276	Down
O43761	SYNGR3	0.00412797	0.0128089	0.108895	Down
Q9BY11	PACSIN1	0.000683761	0.00347744	0.108868	Down
P05771	PRKCB	0.000683761	0.00347744	0.108675	Down
Q15120	PDK3	0.000769231	0.00364963	0.106274	Down
Q16566	CAMK4	0.000769231	0.00364963	0.105957	Down
Q9UPR5	SLC8A2	0.000769231	0.00364963	0.105784	Down
O00408	PDE2A	0.000683761	0.00347744	0.105683	Down
Q7Z6L0	PRRT2	0.0011293	0.00483969	0.105447	Down
Q9UQM7	CAMK2A	0.000683761	0.00347744	0.105437	Down
O14548	COX7A2L	0.00175439	0.00639334	0.105177	Down
Q9UPP5	BTBD8	0.000769231	0.00364963	0.105051	Down
Q9H936	SLC25A22	0.000683761	0.00347744	0.104914	Down
Q96E17	RAB3C	0.000769231	0.00364963	0.103317	Down
Q9P1U1	ACTR3B	0.0011293	0.00483969	0.102597	Down
Q8TBB6	SLC7A14	0.000769231	0.00364963	0.101495	Down
Q8WXG6	MADD	0.000683761	0.00347744	0.101347	Down
P63027	VAMP2	0.000683761	0.00347744	0.100167	Down
P54764	EPHA4	0.000683761	0.00347744	0.100103	Down
Q96RR4	CAMKK2	0.000869565	0.00395717	0.0997392	Down
P41732	TSPAN7	0.000988142	0.00436707	0.0997217	Down
Q6PUV4	CPLX2	0.000683761	0.00347744	0.0995951	Down
Q8N3V7	SYNPO	0.000683761	0.00347744	0.0994242	Down
Q8TDC3	BRSK1	0.000869565	0.00395717	0.0990593	Down
Q8WXI2	CNKSR2	0.00206398	0.00735394	0.0985738	Down
P14406	COX7A2	0.000683761	0.00347744	0.0981008	Down
O75061	DNAJC6	0.000683761	0.00347744	0.0976071	Down
Q7L0J3	SV2A	0.000683761	0.00347744	0.0975117	Down
Q9NYI0	PSD3	0.000683761	0.00347744	0.0962422	Down
Q14982	OPCML	0.0011293	0.00483969	0.0960538	Down
Q9UII2	ATP5IF1	0.000683761	0.00347744	0.0950432	Down
Q15818	NPTX1	0.000769231	0.00364963	0.0948107	Down
Q17R89	ARHGAP44	0.00245098	0.0085831	0.0947323	Down
Q8WZA2	RAPGEF4	0.00245098	0.0085831	0.0939877	Down
P42263	GRIA3	0.000869565	0.00395717	0.0924175	Down
O60268	KIAA0513	0.000683761	0.00347744	0.0917981	Down
Q9P1Y5	CAMSAP3	0.00150376	0.00564217	0.0908743	Down
Q7Z6G3	NECAB2	0.000869565	0.00395717	0.0901691	Down
Q99963	SH3GL3	0.000769231	0.00364963	0.0898549	Down
O15239	NDUFA1	0.0011293	0.00483969	0.0892082	Down
O00194	RAB27B	0.00538461	0.0149428	0.0881041	Down
P21579	SYT1	0.000683761	0.00347744	0.0879378	Down
Q8TDJ6	DMXL2	0.000683761	0.00347744	0.087887	Down
P32004	L1CAM	0.000683761	0.00347744	0.0873141	Down
Q7Z6G8	ANKS1B	0.0012987	0.00521075	0.0870571	Down
P49802	RGS7	0.000769231	0.00364963	0.0867631	Down
Q6H8Q1	ABLIM2	0.000769231	0.00364963	0.0855751	Down
Q8N5V2	NGEF	0.00206398	0.00735394	0.0853441	Down
Q8N461	FBXL16	0.00206398	0.00735394	0.0837138	Down
Q9Y4G8	RAPGEF2	0.000683761	0.00347744	0.0834689	Down
Q684P5	RAP1GAP2	0.000869565	0.00395717	0.0825144	Down
O95178	NDUFB2	0.0011293	0.00483969	0.0821379	Down
O14994	SYN3	0.000683761	0.00347744	0.0806322	Down
Q9Y2K9	STXBP5L	0.0011293	0.00483969	0.0803882	Down
O94910	ADGRL1	0.0012987	0.00521075	0.0768939	Down
Q9Y6K8	AK5	0.000769231	0.00364963	0.0766193	Down
Q8N9R8	SCAI	0.0011293	0.00483969	0.0757592	Down
P23677	ITPKA	0.00206398	0.00735394	0.0753879	Down
Q6U841	SLC4A10	0.000988142	0.00436707	0.0745419	Down
P05937	CALB1	0.0144479	0.033328	0.0736754	Down
P08247	SYP	0.000769231	0.00364963	0.0709911	Down
P55290	CDH13	0.000683761	0.00347744	0.0707335	Down
Q8N608	DPP10	0.000769231	0.00364963	0.0699691	Down
Q14832	GRM3	0.00175439	0.00639334	0.06975	Down
Q08722	CD47	0.000769231	0.00364963	0.0695331	Down
Q5JU85	IQSEC2	0.000683761	0.00347744	0.0670849	Down
Q9ULR3	PPM1H	0.0011293	0.00483969	0.064437	Down
Q02156	PRKCE	0.000683761	0.00347744	0.064303	Down
Q9UMF0	ICAM5	0.000769231	0.00364963	0.0640756	Down
P78352	DLG4	0.000683761	0.00347744	0.0639764	Down
Q99250	SCN2A	0.000869565	0.00395717	0.0639104	Down
P63215	GNG3	0.00451722	0.0135902	0.0617843	Down
Q9Y4C0	NRXN3	0.000988142	0.00436707	0.0606868	Down
Q8NCB2	CAMKV	0.000683761	0.00347744	0.0605238	Down
P35609	ACTN2	0.000683761	0.00347744	0.0602609	Down
Q9P2U7	SLC17A7	0.000869565	0.00395717	0.0602043	Down
Q9UPA5	BSN	0.000683761	0.00347744	0.0596047	Down
Q9UPV7	PHF24	0.000683761	0.00347744	0.0555968	Down
Q16720	ATP2B3	0.000683761	0.00347744	0.055212	Down
Q9Y4F5	CEP170B	0.0011293	0.00483969	0.0546707	Down
Q7Z3B1	NEGR1	0.000769231	0.00364963	0.0541626	Down
Q7L1I2	SV2B	0.000869565	0.00395717	0.0539463	Down
O43581	SYT7	0.0011293	0.00483969	0.0527565	Down
Q9BQI5	SGIP1	0.0012987	0.00521075	0.0526859	Down
Q9UHC6	CNTNAP2	0.000869565	0.00395717	0.0494046	Down
O14578	CIT	0.000683761	0.00347744	0.0491872	Down
Q9H2X9	SLC12A5	0.000683761	0.00347744	0.0491166	Down
Q68DU8	KCTD16	0.00175439	0.00639334	0.0483501	Down
Q9Y2J0	RPH3A	0.000683761	0.00347744	0.0460115	Down
O14827	RASGRF2	0.00150376	0.00564217	0.0436934	Down
Q96PV0	SYNGAP1	0.000683761	0.00347744	0.0405132	Down
Q5T5C0	STXBP5	0.000988142	0.00436707	0.0345529	Down
Q9ULD0	OGDHL	0.000769231	0.00364963	0.0340416	Down
Q9BYB0	SHANK3	0.000869565	0.00395717	0.0325032	Down
P05129	PRKCG	0.000683761	0.00347744	0.0311284	Down
Q92736	RYR2	0.000683761	0.00347744	0.0248371	Down
Q9Y6V0	PCLO	0.000683761	0.00347744	0.0111729	Down
1171 significantly differential proteins between peritumoral brain tissues and glioma tissues
Uniprot ID	Gene Name	P value	FDR	FC	Significant
Q15113	PCOLCE	0.00858272	0.0393045	27.6519	Up
Q99715	COL12A1	0.000488401	0.0129804	16.2341	Up
P02461	COL3A1	0.00361204	0.0270147	13.7003	Up
P05106	ITGB3	0.00427771	0.0282544	10.7221	Up
P32322	PYCR1	0.00331775	0.0253661	10.2499	Up
P78330	PSPH	0.00687129	0.0354686	9.3548	Up
Q99439	CNN2	0.00857227	0.0392969	8.99068	Up
P00488	F13A1	0.00545661	0.0313096	8.6467	Up
P98082	DAB2	0.00603989	0.0340506	7.97597	Up
P11802	CDK4	0.00190308	0.0198999	7.86966	Up
P15144	ANPEP	0.00629258	0.0349023	7.68916	Up
P48431	SOX2	0.00307692	0.0253661	7.49557	Up
Q8IUX7	AEBP1	0.00427771	0.0282544	7.19337	Up
Q71DI3	H3C13	0.000334169	0.0123311	7.12094	Up
O95302	FKBP9	0.012405	0.0493399	6.48537	Up
Q9H3G5	CPVL	0.00802676	0.0392969	6.26842	Up
Q9HC78	ZBTB20	0.00011789	0.00884623	6.25868	Up
P13674	P4HA1	0.00545661	0.0313096	5.94133	Up
P22352	GPX3	0.00926972	0.0417652	5.92509	Up
P02679	FGG	0.00139784	0.0176808	5.00849	Up
P49961	ENTPD1	0.00488047	0.0313093	4.91262	Up
Q9HBL7	PLGRKT	0.00165119	0.0198999	4.88831	Up
O00754	MAN2B1	0.000488401	0.0129804	4.85236	Up
P54802	NAGLU	0.000936455	0.0158091	4.79683	Up
P02671	FGA	0.00331775	0.0253661	4.72478	Up
P02675	FGB	0.00331775	0.0253661	4.69527	Up
Q9H6X2	ANTXR1	0.00263736	0.0237895	4.65634	Up
P17026	ZNF22	9.76801e-05	0.00884623	4.46548	Up
P24844	MYL9	0.00564653	0.0321989	4.45868	Up
P15586	GNS	0.00564653	0.0321989	4.36636	Up
A6NHQ2	FBLL1	0.00225861	0.0225105	4.2842	Up
P16284	PECAM1	0.00338792	0.0257701	4.16143	Up
Q96ME7	ZNF512	0.00433048	0.0285186	4.12818	Up
P16452	EPB42	0.0105764	0.0439289	4.12515	Up
P05114	HMGN1	1.68414e-05	0.0083552	4.12482	Up
P23921	RRM1	0.00488047	0.0313093	4.05957	Up
O00461	GOLIM4	1.801e-05	0.0083552	4.01781	Up
Q9NVH6	TMLHE	0.0051689	0.0313096	3.96639	Up
P17050	NAGA	0.000319986	0.0120062	3.8268	Up
Q96CP2	FLYWCH2	0.00125332	0.0176808	3.76747	Up
P02549	SPTA1	0.0105764	0.0439289	3.76153	Up
P09486	SPARC	0.00190308	0.0198999	3.7238	Up
Q86UT6	NLRX1	0.00802676	0.0392969	3.70933	Up
Q9HAV4	XPO5	0.0103582	0.0439289	3.67476	Up
Q8TEW0	PARD3	0.00701754	0.0359327	3.65991	Up
P17480	UBTF	0.000319986	0.0120062	3.65725	Up
O95864	FADS2	0.00139784	0.0176808	3.6507	Up
Q9Y333	LSM2	0.00205624	0.0210094	3.60188	Up
Q6ZU35	CRACD	0.00271033	0.0242518	3.54587	Up
Q96LI5	CNOT6L	9.90957e-05	0.00884623	3.53585	Up
O95070	YIF1A	0.00608696	0.0341756	3.51133	Up
Q7LBC6	KDM3B	0.000707339	0.0139472	3.45478	Up
Q13523	PRPF4B	0.00148644	0.0183341	3.45351	Up
Q8IY67	RAVER1	0.00949833	0.0425804	3.41743	Up
P09871	C1S	0.00687129	0.0354686	3.4128	Up
P07305	H1-0	0.00190308	0.0198999	3.38319	Up
P27708	CAD	0.00101048	0.0158091	3.32353	Up
Q63ZY3	KANK2	0.00545661	0.0313096	3.31294	Up
Q9BV38	WDR18	0.00323112	0.0253661	3.29132	Up
Q96C86	DCPS	0.000488401	0.0129804	3.28241	Up
Q9P2B2	PTGFRN	0.00331775	0.0253661	3.28165	Up
Q9BY77	POLDIP3	0.000488401	0.0129804	3.25801	Up
Q9H2D6	TRIOBP	0.00545661	0.0313096	3.24945	Up
Q14151	SAFB2	0.00139784	0.0176808	3.21747	Up
P05204	HMGN2	0.00139784	0.0176808	3.21086	Up
Q8NCN5	PDPR	0.00252621	0.0228794	3.19207	Up
Q9BQG0	MYBBP1A	0.00427771	0.0282544	3.17226	Up
P14209	CD99	0.00545661	0.0313096	3.16732	Up
Q8WX92	NELFB	0.00857227	0.0392969	3.11062	Up
Q9UPN9	TRIM33	0.00985102	0.0436357	3.10279	Up
O00422	SAP18	0.00545661	0.0313096	3.09981	Up
Q96C36	PYCR2	0.00687129	0.0354686	3.08391	Up
Q06210	GFPT1	0.00331775	0.0253661	3.05303	Up
P46977	STT3A	0.00687129	0.0354686	2.99652	Up
Q8N3U4	STAG2	0.00545661	0.0313096	2.99379	Up
P02730	SLC4A1	0.012951	0.0493399	2.9846	Up
Q9BZF9	UACA	0.000707339	0.0139472	2.97709	Up
O75531	BANF1	0.00011789	0.00884623	2.97167	Up
Q14683	SMC1A	1.68414e-05	0.0083552	2.96835	Up
Q08945	SSRP1	0.00331775	0.0253661	2.96378	Up
Q14980	NUMA1	0.000488401	0.0129804	2.95557	Up
Q05682	CALD1	0.00857227	0.0392969	2.95129	Up
O75694	NUP155	0.00687129	0.0354686	2.94496	Up
O76021	RSL1D1	0.012951	0.0493399	2.94184	Up
P34897	SHMT2	0.00331775	0.0253661	2.93385	Up
Q5JS54	PSMG4	0.00918193	0.0414533	2.88316	Up
Q05048	CSTF1	0.0105764	0.0439289	2.8634	Up
P63165	SUMO1	0.00427771	0.0282544	2.84439	Up
O43294	TGFB1I1	0.00531715	0.0313096	2.84323	Up
Q9BXW7	HDHD5	0.00427771	0.0282544	2.83551	Up
P20700	LMNB1	0.00190308	0.0198999	2.81296	Up
Q9NVP1	DDX18	0.00857227	0.0392969	2.80903	Up
P42785	PRCP	0.00427771	0.0282544	2.80772	Up
P09661	SNRPA1	0.00041606	0.0129804	2.79151	Up
O00479	HMGN4	0.00190308	0.0198999	2.78238	Up
Q9NX58	LYAR	0.00271033	0.0242518	2.78176	Up
P49711	CTCF	0.00545661	0.0313096	2.77008	Up
Q12874	SF3A3	0.00857227	0.0392969	2.74982	Up
Q71UI9	H2AZ2	6.73656e-05	0.0083552	2.7356	Up
Q96RQ1	ERGIC2	0.00545661	0.0313096	2.73379	Up
O60678	PRMT3	0.0070903	0.0360983	2.73313	Up
Q12996	CSTF3	0.00190308	0.0198999	2.72744	Up
O43347	MSI1	0.00495356	0.0313096	2.70358	Up
P37198	NUP62	2.17657e-05	0.0083552	2.69786	Up
P55263	ADK	6.73656e-05	0.0083552	2.69634	Up
P52298	NCBP2	0.00687129	0.0354686	2.69385	Up
Q99459	CDC5L	0.00011789	0.00884623	2.68348	Up
P04040	CAT	0.00427771	0.0282544	2.67138	Up
P98175	RBM10	0.00139784	0.0176808	2.66418	Up
O14776	TCERG1	0.00687129	0.0354686	2.66353	Up
O95777	LSM8	0.001221	0.0175298	2.65615	Up
O43719	HTATSF1	0.0105764	0.0439289	2.6536	Up
Q96KA5	CLPTM1L	0.0119518	0.048294	2.64162	Up
P49959	MRE11	3.48666e-05	0.0083552	2.63975	Up
Q96MU7	YTHDC1	0.00243372	0.0228794	2.63601	Up
Q8WYA6	CTNNBL1	0.012951	0.0493399	2.63249	Up
O60832	DKC1	1.70801e-05	0.0083552	2.63082	Up
Q8N5N7	MRPL50	0.00488047	0.0313093	2.62403	Up
Q9UKN8	GTF3C4	0.000718444	0.0139472	2.62302	Up
Q53T59	HS1BP3	0.000590151	0.0139472	2.62269	Up
O95359	TACC2	0.00194409	0.0202339	2.61975	Up
O96019	ACTL6A	0.00331775	0.0253661	2.61297	Up
Q9Y3Y2	CHTOP	0.0105764	0.0439289	2.60232	Up
O60264	SMARCA5	0.00331775	0.0253661	2.5977	Up
P46063	RECQL	0.00545661	0.0313096	2.59572	Up
Q96EL3	MRPL53	0.00252356	0.0228794	2.59373	Up
Q7Z5L9	IRF2BP2	0.00190308	0.0198999	2.58966	Up
Q9BZK7	TBL1XR1	0.000319986	0.0120062	2.58798	Up
Q9BTT0	ANP32E	0.00101048	0.0158091	2.57897	Up
Q86U86	PBRM1	0.00427771	0.0282544	2.57664	Up
Q9BTY2	FUCA2	0.0119518	0.048294	2.57029	Up
P30536	TSPO	0.0058971	0.0334144	2.57018	Up
P08397	HMBS	0.000707339	0.0139472	2.56872	Up
Q8IUI8	CRLF3	0.0125752	0.0493399	2.56847	Up
P78347	GTF2I	0.000203095	0.0110587	2.56737	Up
O60306	AQR	0.0070903	0.0360983	2.55935	Up
Q12972	PPP1R8	0.000707339	0.0139472	2.55415	Up
Q8N7H5	PAF1	0.000715227	0.0139472	2.55128	Up
P18754	RCC1	0.00252621	0.0228794	2.54488	Up
Q8WVC6	DCAKD	0.000202097	0.0110587	2.53386	Up
Q9NZ08	ERAP1	0.00687129	0.0354686	2.53289	Up
P10253	GAA	0.00333316	0.0254403	2.52404	Up
Q9H3N1	TMX1	0.00413143	0.0282544	2.52284	Up
P07738	BPGM	0.00331775	0.0253661	2.51982	Up
Q96RF0	SNX18	0.00427771	0.0282544	2.51409	Up
P49736	MCM2	0.0127798	0.0493399	2.51358	Up
Q9BRJ7	NUDT16L1	0.00279946	0.0247516	2.51162	Up
Q92625	ANKS1A	0.00205624	0.0210094	2.51143	Up
Q8TDY4	ASAP3	0.0121965	0.0489284	2.50697	Up
Q12769	NUP160	0.0051689	0.0313096	2.50402	Up
Q86VM9	ZC3H18	0.012951	0.0493399	2.50012	Up
P56270	MAZ	0.00427771	0.0282544	2.49364	Up
Q9UQE7	SMC3	0.00101048	0.0158091	2.49074	Up
Q8IXH7	NELFCD	0.00343569	0.0260006	2.48583	Up
P26599	PTBP1	0.00204199	0.0210094	2.4837	Up
Q92621	NUP205	0.00857227	0.0392969	2.47776	Up
Q14839	CHD4	0.00252621	0.0228794	2.47378	Up
Q9Y4Z0	LSM4	0.00210551	0.0214148	2.47016	Up
O60341	KDM1A	0.00427771	0.0282544	2.46453	Up
Q29RF7	PDS5A	0.0105764	0.0439289	2.4576	Up
Q96M27	PRRC1	0.00168905	0.0198999	2.44464	Up
O43395	PRPF3	0.00371609	0.0275219	2.44246	Up
Q14739	LBR	0.00545661	0.0313096	2.43669	Up
O43818	RRP9	0.00857227	0.0392969	2.43316	Up
Q2TAL8	QRICH1	0.000988142	0.0158091	2.4242	Up
P52948	NUP98	0.00139784	0.0176808	2.42114	Up
Q96T37	RBM15	0.00545661	0.0313096	2.41586	Up
Q9H7C9	AAMDC	0.00738209	0.0374132	2.41428	Up
Q5VT52	RPRD2	0.000894033	0.0158091	2.40837	Up
Q08379	GOLGA2	3.36828e-05	0.0083552	2.39977	Up
Q9UGP8	SEC63	0.00949833	0.0425804	2.39456	Up
Q7L0Y3	TRMT10C	0.0105764	0.0439289	2.3937	Up
Q9BUQ8	DDX23	0.000707339	0.0139472	2.38815	Up
Q07065	CKAP4	0.00545661	0.0313096	2.38131	Up
Q9UKX7	NUP50	0.00139784	0.0176808	2.38022	Up
O95486	SEC24A	0.00301321	0.0253661	2.37941	Up
P80303	NUCB2	0.000462274	0.0129804	2.37718	Up
O95249	GOSR1	0.00331775	0.0253661	2.37537	Up
O94906	PRPF6	0.00139784	0.0176808	2.37531	Up
P62269	RPS18	0.000319986	0.0120062	2.37328	Up
Q08170	SRSF4	0.0105764	0.0439289	2.36678	Up
O00567	NOP56	0.00252621	0.0228794	2.36482	Up
Q9H3P2	NELFA	0.00427771	0.0282544	2.36307	Up
P62266	RPS23	0.00331775	0.0253661	2.36107	Up
A8CG34	POM121C	0.0107122	0.0442872	2.3572	Up
Q53GS9	USP39	0.00155443	0.0190674	2.35304	Up
A6NIH7	UNC119B	0.00316497	0.0253661	2.35112	Up
Q99829	CPNE1	0.00109541	0.0162492	2.3499	Up
Q08J23	NSUN2	0.00400895	0.0282544	2.34927	Up
O15357	INPPL1	0.00545661	0.0313096	2.34645	Up
Q969G3	SMARCE1	0.0105764	0.0439289	2.34179	Up
Q15293	RCN1	0.000488401	0.0129804	2.34098	Up
P62851	RPS25	0.00687129	0.0354686	2.33912	Up
P28065	PSMB9	0.0105764	0.0439289	2.33786	Up
O75027	ABCB7	0.000488401	0.0129804	2.33441	Up
O00267	SUPT5H	0.012951	0.0493399	2.33316	Up
Q9NR30	DDX21	0.00252621	0.0228794	2.33299	Up
O15355	PPM1G	0.012951	0.0493399	2.33123	Up
Q15651	HMGN3	0.012951	0.0493399	2.32525	Up
P08670	VIM	0.0101737	0.0439289	2.32433	Up
P22087	FBL	0.000488401	0.0129804	2.32411	Up
Q14160	SCRIB	0.00190308	0.0198999	2.32266	Up
P18887	XRCC1	0.0002442	0.0120062	2.32083	Up
Q92878	RAD50	0.000319986	0.0120062	2.31453	Up
O43670	ZNF207	0.0030525	0.0253661	2.31409	Up
Q9H2K8	TAOK3	0.00190308	0.0198999	2.31258	Up
Q92620	DHX38	0.00081892	0.0155595	2.30047	Up
P02649	APOE	0.00545661	0.0313096	2.29514	Up
Q6ZPD9	DPY19L3	0.0103582	0.0439289	2.28808	Up
P27695	APEX1	0.00545661	0.0313096	2.27992	Up
Q99729	HNRNPAB	0.00190308	0.0198999	2.27626	Up
[truncated: 963 more rows]

## Sheet: Cohort 3
18 significantly differential proteins between peripheral plasma from non-glioma and glioma patients
Name	Symbol	p.value	FDR	FC	significant
P06396	GSN	3.50418e-07	0.000118091	0.682343	Down
P08185	SERPINA6	2.88501e-06	0.000486125	0.746397	Down
Q12805	EFEMP1	5.30567e-06	0.000596004	0.641295	Down
P05452	CLEC3B	1.20701e-05	0.00101691	0.76287	Down
P51884	LUM	2.7051e-05	0.00182324	0.684792	Down
P11597	CETP	3.67024e-05	0.00206145	0.613824	Down
Q6UXB8	PI16	0.000121909	0.00586905	0.50041	Down
P55058	PLTP	0.000269213	0.00891282	0.708644	Down
Q9UGM5	FETUB	0.000298559	0.00891282	0.718099	Down
P23142	FBLN1	0.000353395	0.00891282	0.724729	Down
P02654	APOC1	0.00028284	0.00891282	0.742931	Down
P00488	F13A1	0.000322617	0.00891282	0.752011	Down
Q96PD5	PGLYRP2	0.000375773	0.00891282	0.806633	Down
P01701	IGLV1-51	0.000295754	0.00891282	1.64445	Up
A0A0J9YX35	IGHV3-64D	0.000396713	0.00891282	1.88126	Up
A8MQ11	PMS2P5	0.000479009	0.0100891	2.57425	Up
P06727	APOA4	0.000962539	0.0190809	0.688422	Down
Q9NQ79	CRTAC1	0.00141553	0.0265018	0.603218	Down
