# Supplementary material for: Development of a Metabolic Subtype Classifier for Low- Grade Glioma to Guide Precision Therapy
Source: Research Square preprint supplement (doi:10.21203/rs.3.rs-7778086/v1), 2025-12-16
Supplement: Supplementary file 8 [file adk1721_Data_S4.xlsx]

## Sheet: Patients' information
Patient ID	Gender	Height（cm）	Weight（kg）	BMI	Diagnosis
MT01	Male	150	43	19.11	Meningoma, WHO I
MT02	Male	-	-	-	Meningoma
MT03	Female	168	72.5	25.69	Meningoma, WHO I
MT04	Female	164	62	23.05	Meningoma, WHO I
MT05	Male	-	-	-	Meningoma
MT06	Female	-	-	-	Meningoma
MT07	Female	150	45	20	Meningoma, WHO I
MT08	Female	165	60	22.04	Meningoma, WHO I
MT09	Female	155	70	29.14	Meningoma, WHO II
MT10	Female	158	53	21.23	Meningoma, WHO I
MN01	Female	150	40	17.78	Massive cerebral infarction
MN02	Male	175	65	21.22	Epilepsy
MN03	Female	155	50	20.81	Massive cerebral infarction
MN04	Male	170	75	25.95	Ruptured intracranial aneurysm
MN05	Female	150	50	22.22	Ruptured intracranial aneurysm

## Sheet: Characteristics
Category	Meningoma Tissue (n = 10)	Normal Tissue (n = 5)	P
Sex, no. (%)			>0.9999
Male	3 (30.00%)	2 (40.00%)
Female	7 (70.00%)	3 (60.00%)
BMI, kg/m2			0.5146
Mean ± SD	22.9 ± 3.2	21.6 ± 2.6
Median(IQR)	22.0 (20.6-24.4)	21.2 (20.8-22.2)
Range	19.1-29.1	17.8-26.0

## Sheet: Protein intensities
Gene Name	Type	GATD3	IGHV4-61	UBA6	ESYT2	SHTN1	ILVBL	NBAS	WDR91	CNOT1	CARNS1	PGP	ALBU	KRT1	KRT10	KRT9	K22E	TPM2	NACA	AGPS	KIF2A	TK2	PDLIM1	ACOT7	MYO1C	SNAP23	AIP	STXBP3	AP3B1	NDUFS8	PSMD11	PSMD12	PSMD9	ATOX1	PGRMC1	HIP1	CLIC1	EIF3F	PDHX	DCTN6	WASL	IPO5	DNM1L	RTCA	AGRN	NDUFA4	PSMD14	BIN1	KPNA3
MN01	Normal	1555900	82106	383280	204060	182910	154800	22912	34256	113220	700120	204060	45510000	3040000	708950	731060	178620	93572	245710	38214	2092400	377430	86513	1130300	32372	84799	150420	113290	25825	1303700	145510	107450	139310	332910	678260	30765	222800	109310	580240	218360	98143	350930	555230	117320	229830	909200	188850	1138200	110030
MN02	Normal	1505300	93025	521840	158710	296340	143780	24092	45815	95672	548960	254380	30011000	1908600	465610	693620	151550	32018	270190	62974	2345300	496430	30686	1499300	41114	71378	143990	166360	14155	988950	190250	156090	103750	494150	792400	38085	219040	143480	282210	175760	79560	422090	554800	112910	228410	922410	212680	1232100	172250
MN03	Normal	1501600	38554	534770	159920	292330	149490	34091	22612	95087	805650	240490	13954000	491970	126800	264580	20864	52753	450240	37852	3363700	247320	30856	1908800	26197	72442	115210	175070	28134	1078500	193090	183370	134600	419800	550770	98411	100910	152920	394960	206930	104540	379410	718860	94855	168600	724900	199350	1580000	167830
MN04	Normal	1971500	101070	98778	233970	104730	136270	29721	14991	138290	129050	102420	22676000	3435900	850080	1389400	337130	112250	180820	37886	2032000	218960	367170	1053300	66910	109310	102370	93125	9099.6	1205000	117170	104080	238960	168490	694000	58113	476030	35468	493930	128240	40453	266040	386000	32981	212490	929350	120240	787800	104910
MN05	Normal	1491200	60954	676210	125110	348220	143510	43235	42764	84206	849500	191170	21844000	1038000	269610	204520	55665	50660	284170	33741	2647500	325090	26041	1969800	32510	87848	110520	178640	23328	936600	185340	135020	118550	363280	533770	128960	134570	146860	500410	213660	71317	404650	746770	122170	164180	971930	228930	1563300	192260
MT01	Meningoma	937300	65707	680240	279850	57451	363710	54534	60475	153920	110390	63735	35420000	717180	200550	652640	22486	817440	715770	21105	360650	380910	129330	15082	282100	402490	253860	224250	234460	386770	299410	188350	253710	488180	3158300	91101	1193400	314510	123910	101130	41216	341420	161680	61155	333960	277760	309300	206870	110790
MT02	Meningoma	799210	90771	727540	228350	215680	133300	52640	78280	269050	194850	107620	34675000	1321700	228490	461260	59188	187440	608360	53188	375750	560570	198550	26013	536490	269520	238080	206020	208580	339350	215820	212600	149430	256400	677640	102440	715420	436640	69654	84363	49428	333590	151230	107660	586350	232770	225520	293970	178990
MT03	Meningoma	636450	86396	807450	334740	100330	289340	69042	60275	153020	124360	141240	46754000	5352900	1120100	2257900	258980	868280	738890	43064	340100	459920	451600	18421	591550	310840	272280	138200	265240	219950	297070	185220	239500	376340	2152200	87069	1252200	305370	52454	167080	48690	514700	133900	49554	209030	289760	282400	250520	175420
MT04	Meningoma	870540	160940	302810	209510	115500	89963	40772	32201	159490	100040	53787	63291000	1431300	346140	1002000	99517	511020	725830	29701	89217	349180	304690	35417	454720	327710	305910	158690	245440	250620	261320	129370	347650	180570	1554800	72862	1072500	318650	12143	143000	28524	342560	115070	96925	326330	357810	174000	360600	171180
MT05	Meningoma	592290	49239	766440	388180	123480	327930	95014	67698	235380	81086	126960	20555000	1947400	281760	1180300	72331	143380	810030	117880	719030	500090	501900	63540	603230	292810	419740	189430	277990	324710	318820	255390	255600	389020	1849600	36951	838680	404960	100030	136910	49172	632080	250350	105780	461150	343420	315000	436150	262430
MT06	Meningoma	600240	611500	879620	263170	89283	298310	53160	33898	151060	102190	52412	79998000	1530400	329730	657680	81587	954710	492420	37120	351270	290700	76142	18040	490390	222130	234810	153280	135970	215370	240740	313320	247620	499290	1617500	97623	1079900	319870	29619	107730	55226	348870	122980	96245	288470	141370	244880	269880	139430
MT07	Meningoma	741400	113320	966490	357250	140090	257610	57398	57664	143880	244900	58455	32841000	2699500	716160	898910	331930	831500	779480	60206	483770	547970	272910	18084	309160	318770	235670	237250	168600	258280	308770	278670	207960	492670	1428900	185580	1248400	359670	40398	147100	85004	373370	128580	113120	156180	175320	395740	251760	148080
MT08	Meningoma	842370	71363	1077500	342820	45674	469550	50066	43749	128100	60542	16813	53233000	1036400	240300	404620	81365	79206	250950	28742	393980	338730	81386	31554	1075900	178360	252130	283340	163340	302310	231210	175560	168390	89875	1487200	45172	1068400	365370	94675	60448	23912	266500	179180	78144	346930	258790	332980	167000	126850
MT09	Meningoma	878120	500940	719250	231770	38883	344890	44234	57004	159350	99592	32403	88981000	2213000	782390	1190500	219490	68470	987820	26787	338450	418470	51724	35342	574240	307010	199490	270620	263970	341060	284960	179510	302930	270920	1047100	59692	1043100	317250	157570	62231	47491	361790	123780	69666	321290	224370	292110	228040	169190
MT10	Meningoma	894590	68119	588720	289450	65861	480070	65385	35953	131820	128710	30038	37005000	1496900	194180	1001700	50083	201130	806160	34092	465510	400700	37670	31669	829890	219950	193830	294400	146130	329200	215410	164900	297060	330750	861160	65508	1774400	337580	81177	90163	43992	344430	147480	63554	399990	284890	208840	242630	203100
[truncated: 3,262 more columns]

## Sheet: Significantly changed proteins
Uniprot ID	Gene Name	P value	FDR	FC	Significant
P0DPI2	GATD3	0.000666001	0.00209949	0.485484	Down
A0AVT1	UBA6	0.031892	0.0493513	1.69672	Up
A0FGR8	ESYT2	0.0012548	0.00361479	1.65865	Up
A0MZ66	SHTN1	0.0260929	0.041663	0.405148	Down
A2RRP1	NBAS	0.000658686	0.00209949	1.88978	Up
A4D1P6	WDR91	0.0234993	0.0379428	1.64299	Up
A5YKK6	CNOT1	0.002664	0.00589823	1.60033	Up
A5YM72	CARNS1	0.002664	0.00589823	0.205497	Down
A6NDG6	PGP	0.00454813	0.0094323	0.344307	Down
P02768-1	ALBU	0.0240193	0.0385568	1.8387	Up
Q3SX28	TPM2	0.00799201	0.0146476	6.83155	Up
E9PAV3	NACA	0.000172386	0.00202339	2.41617	Up
O00139	KIF2A	0.000666001	0.00209949	0.156949	Down
O00154	ACOT7	0.000666001	0.00209949	0.0193852	Down
O00159	MYO1C	0.000666001	0.00209949	14.4339	Up
O00161	SNAP23	0.000666001	0.00209949	3.34634	Up
O00170	AIP	0.000666001	0.00209949	2.09298	Up
O00186	STXBP3	0.0166737	0.0279301	1.4835	Up
O00203	AP3B1	0.000666001	0.00209949	10.4918	Up
O00217	NDUFS8	0.000666001	0.00209949	0.26916	Down
O00231	PSMD11	0.000496395	0.00209949	1.60793	Up
O00232	PSMD12	0.00998228	0.0179377	1.51812	Up
O00233	PSMD9	0.00949764	0.0171413	1.67978	Up
O00264	PGRMC1	0.00466201	0.0094323	2.43666	Up
O00299	CLIC1	2.11688e-06	7.22357e-05	4.89288	Up
O00303	EIF3F	3.54553e-05	0.00060183	2.95888	Up
O00330	PDHX	0.000666001	0.00209949	0.16912	Down
O00399	DCTN6	0.00500858	0.0100781	0.583358	Down
O00429	DNM1L	0.000666001	0.00209949	0.255639	Down
O00483	NDUFA4	0.000666001	0.00209949	0.290083	Down
O00487	PSMD14	0.00843679	0.0154286	1.46349	Up
O00499	BIN1	0.000666001	0.00209949	0.214827	Down
O00534	VWA5A	0.002664	0.00589823	2.21745	Up
O00560	SDCBP	0.027972	0.0437352	2.3606	Up
O00567	NOP56	0.000666001	0.00209949	4.78007	Up
O00571	DDX3X	0.000666001	0.00209949	1.79771	Up
O00584	RNASET2	0.000666001	0.00209949	5.3118	Up
O00629	KPNA4	0.0064548	0.0127326	1.86793	Up
O14498	ISLR	0.000666001	0.00209949	20.3019	Up
O14561	NDUFAB1	0.000323194	0.00209949	0.290444	Down
O14578	CIT	0.001332	0.00366494	0.272612	Down
O14579	COPE	0.000666001	0.00209949	4.70243	Up
O14617	AP3D1	0.00466201	0.0094323	0.548652	Down
O14639	ABLIM1	0.00799201	0.0146476	2.06967	Up
O14744	PRMT5	0.00045185	0.00209949	1.52922	Up
O14745	NHERF1	3.96313e-05	0.000649404	0.37299	Down
O14773	TPP1	0.000666001	0.00209949	2.91076	Up
O14818	PSMA7	0.000666001	0.00209949	1.60241	Up
O14841	OPLAH	0.012654	0.0218036	2.70967	Up
O14880	MGST3	0.000264272	0.00209949	0.36491	Down
O14949	UQCRQ	0.00114214	0.00330173	0.336847	Down
O14950	MYL12B	0.027972	0.0437352	2.00198	Up
O14974	PPP1R12A	0.002664	0.00589823	1.82716	Up
O14979	HNRNPDL	0.00778582	0.0146476	1.687	Up
O14980	XPO1	5.76722e-06	0.000144617	1.87899	Up
O15020	SPTBN2	0.000666001	0.00209949	0.0336364	Down
O15031	PLXNB2	5.4729e-07	2.78713e-05	3.55944	Up
O15067	PFAS	0.00898241	0.0163272	1.55014	Up
O15075	DCLK1	0.000666001	0.00209949	0.120352	Down
O15084	ANKRD28	0.00799201	0.0146476	0.426115	Down
O15126	SCAMP1	0.00314157	0.00681429	0.414139	Down
O15143	ARPC1B	0.000666001	0.00209949	7.71636	Up
O15145	ARPC3	0.0243702	0.0390821	1.35514	Up
O15173	PGRMC2	0.00799201	0.0146476	1.47717	Up
O15230	LAMA5	0.00466201	0.0094323	4.12811	Up
O15258	RER1	0.000666001	0.00209949	2.29358	Up
O15260	SURF4	0.000666001	0.00209949	2.74201	Up
O15269	SPTLC1	0.000666001	0.00209949	5.42288	Up
O15294	OGT	0.000666001	0.00209949	0.237959	Down
O15371	EIF3D	1.70416e-05	0.000339805	3.3579	Up
O15372	EIF3H	6.79261e-05	0.000997147	2.44362	Up
O15484	CAPN5	0.000666001	0.00209949	0.0968967	Down
O15498	YKT6	0.018994	0.0314194	0.566661	Down
O15511	ARPC5	0.000666001	0.00209949	2.44864	Up
O15530	PDPK1	0.000666001	0.00209949	0.33519	Down
O43143	DHX15	0.000666001	0.00209949	6.4767	Up
O43157	PLXNB1	0.019314	0.0315594	0.231405	Down
O43172	PRPF4	0.000666001	0.00209949	5.74595	Up
O43175	PHGDH	0.002664	0.00589823	0.18855	Down
O43181	NDUFS4	0.000151095	0.00185232	0.205213	Down
O43236	SEPTIN4	0.000666001	0.00209949	0.0221657	Down
O43237	DYNC1LI2	0.0114424	0.0203735	0.624124	Down
O43242	PSMD3	0.000325901	0.00209949	1.63042	Up
O43301	HSPA12A	0.00466201	0.0094323	0.295953	Down
O43390	HNRNPR	1.05791e-05	0.0002366	2.50915	Up
O43399	TPD52L2	0.002664	0.00589823	2.57481	Up
O43426	SYNJ1	0.000666001	0.00209949	0.0163205	Down
O43427	FIBP	0.000666001	0.00209949	0.345196	Down
O43488	AKR7A2	0.027972	0.0437352	1.37662	Up
O43491	EPB41L2	0.00466201	0.0094323	2.35385	Up
O43504	LAMTOR5	0.019314	0.0315594	2.64256	Up
O43583	DENR	0.0291171	0.0454183	0.755241	Down
O43598	DNPH1	0.00575155	0.0114823	1.82702	Up
O43615	TIMM44	0.014855	0.0250483	0.757844	Down
O43674	NDUFB5	5.76164e-06	0.000144617	0.274467	Down
O43676	NDUFB3	0.000666001	0.00209949	0.249078	Down
O43684	BUB3	0.000666001	0.00209949	3.98777	Up
O43707	ACTN4	0.000666001	0.00209949	2.17724	Up
O43809	NUDT21	0.000666001	0.00209949	2.38075	Up
O43813	LANCL1	0.00799201	0.0146476	0.43332	Down
O43837	IDH3B	0.000666001	0.00209949	0.187887	Down
O43852	CALU	0.000666001	0.00209949	4.66475	Up
O43920	NDUFS5	3.24048e-06	9.66307e-05	0.291763	Down
O60262	GNG7	0.000666001	0.00209949	0.0777994	Down
O60271	SPAG9	0.000666001	0.00209949	3.33978	Up
O60313	OPA1	6.53188e-07	3.22694e-05	0.20039	Down
O60331	PIP5K1C	0.000666001	0.00209949	0.0904988	Down
O60504	SORBS3	0.000666001	0.00209949	17.5862	Up
O60506	SYNCRIP	0.000666001	0.00209949	2.89229	Up
O60547	GMDS	0.000666001	0.00209949	9.07823	Up
O60610	DIAPH1	0.00933013	0.0168574	2.00939	Up
O60641	SNAP91	0.000666001	0.00209949	0.0219355	Down
O60664	PLIN3	0.001332	0.00366494	3.14096	Up
O60716	CTNND1	0.000666001	0.00209949	2.65427	Up
O60749	SNX2	0.000666001	0.00209949	2.26627	Up
O60762	DPM1	0.00466201	0.0094323	3.11367	Up
O60763	USO1	0.000666001	0.00209949	1.79814	Up
O60784	TOM1	0.00600041	0.0119288	0.643854	Down
P62807	H2BC10	0.000666001	0.00209949	3.34897	Up
O60826	CCDC22	0.00554381	0.0110876	1.74848	Up
O60841	EIF5B	0.000666001	0.00209949	3.6268	Up
O60884	DNAJA2	0.000884837	0.00272701	0.590652	Down
O75061	DNAJC6	0.000666001	0.00209949	0.00872585	Down
O75122	CLASP2	0.000666001	0.00209949	0.302746	Down
O75131	CPNE3	0.000308888	0.00209949	2.05918	Up
O75165	DNAJC13	0.000666001	0.00209949	9.90153	Up
O75208	COQ9	0.00799201	0.0146476	0.49727	Down
O75223	GGCT	0.002664	0.00589823	0.421673	Down
O75251	NDUFS7	3.94313e-05	0.000649341	0.302182	Down
O75306	NDUFS2	1.87336e-07	1.26184e-05	0.281807	Down
O75323	NIPSNAP2	0.000666001	0.00209949	0.35872	Down
O75340	PDCD6	0.0036638	0.00788504	1.40537	Up
O75351	VPS4B	2.62415e-09	5.79063e-07	2.76102	Up
O75367	MACROH2A1	0.00799201	0.0146476	2.97674	Up
O75368	SH3BGRL	0.000809299	0.00251765	1.87927	Up
O75369	FLNB	0.000666001	0.00209949	18.5789	Up
O75380	NDUFS6	5.76488e-05	0.00087531	0.193904	Down
O75390	CS	5.09226e-08	4.43563e-06	0.253065	Down
O75431	MTX2	0.000349403	0.00209949	0.40688	Down
O75436	VPS26A	0.000566246	0.00209949	1.47285	Up
O75477	ERLIN1	1.40144e-05	0.000293593	2.91016	Up
O75489	NDUFS3	9.73476e-05	0.00129928	0.299862	Down
O75494	SRSF10	0.000666001	0.00209949	3.65327	Up
O75531	BANF1	0.000666001	0.00209949	6.83142	Up
O75533	SF3B1	0.000666001	0.00209949	6.30462	Up
O75643	SNRNP200	0.000666001	0.00209949	4.44376	Up
O75663	TIPRL	0.0139905	0.0236994	0.601784	Down
O75694	NUP155	0.000666001	0.00209949	7.43686	Up
O75746	SLC25A12	0.000666001	0.00209949	0.180354	Down
O75781	PALM	0.000666001	0.00209949	0.291408	Down
O75821	EIF3G	0.000953711	0.00290826	3.43948	Up
O75832	PSMD10	0.00636797	0.0125914	1.34773	Up
O75844	ZMPSTE24	0.00466201	0.0094323	1.94452	Up
O75874	IDH1	2.59869e-06	8.35115e-05	2.92311	Up
O75880	SCO1	0.019314	0.0315594	0.589837	Down
O75884	RBBP9	0.012654	0.0218036	3.96383	Up
O75891	ALDH1L1	0.002664	0.00589823	0.178913	Down
O75934	BCAS2	0.000666001	0.00209949	5.26028	Up
O75935	DCTN3	2.29324e-07	1.43447e-05	0.34195	Down
O75937	DNAJC8	0.000666001	0.00209949	3.08846	Up
O75947	ATP5PD	9.77894e-08	6.88687e-06	0.326923	Down
O75955	FLOT1	0.00156378	0.0041244	0.402944	Down
O75964	ATP5MG	0.000375384	0.00209949	0.377034	Down
O76041	NEBL	0.019314	0.0315594	0.569232	Down
O76094	SRP72	0.00138335	0.00379048	1.966	Up
O94760	DDAH1	0.00101187	0.00294314	0.209482	Down
O94819	KBTBD11	0.027972	0.0437352	0.30004	Down
O94826	TOMM70	2.36859e-07	1.43447e-05	0.326491	Down
O94855	SEC24D	0.027972	0.0437352	4.17281	Up
O94856	NFASC	0.000666001	0.00209949	0.00208722	Down
O94874	UFL1	0.000666001	0.00209949	3.20596	Up
O94905	ERLIN2	0.000666001	0.00209949	3.05042	Up
O94925	GLS	0.000666001	0.00209949	0.0893311	Down
O94973	AP2A2	4.56647e-12	5.03834e-09	0.288401	Down
O94979	SEC31A	0.000666001	0.00209949	3.02274	Up
O95140	MFN2	5.65154e-06	0.000143897	0.31018	Down
O95168	NDUFB4	0.000258653	0.00209949	0.251438	Down
O95169	NDUFB8	0.000112803	0.00146422	0.247143	Down
O95182	NDUFA7	0.000666001	0.00209949	0.160976	Down
O95197	RTN3	0.000469006	0.00209949	0.221368	Down
O95202	LETM1	1.15079e-14	3.80912e-11	0.214668	Down
O95219	SNX4	1.76291e-05	0.000349415	0.510766	Down
O95292	VAPB	0.000751832	0.00235214	0.507318	Down
O95295	SNAPIN	4.3421e-05	0.000704527	2.25077	Up
O95298	NDUFC2	2.29492e-05	0.000429164	0.260068	Down
O95299	NDUFA10	2.20604e-06	7.451e-05	0.289807	Down
O95319	CELF2	0.00799201	0.0146476	0.515896	Down
O95336	PGLS	8.33145e-05	0.00113021	2.19567	Up
O95425	SVIL	0.002664	0.00589823	8.74641	Up
O95487	SEC24B	0.000666001	0.00209949	2.28402	Up
O95563	MPC2	0.000384458	0.00209949	0.431667	Down
O95670	ATP6V1G2	0.000666001	0.00209949	0.0221999	Down
O95671	ASMTL	0.0107626	0.0192562	1.97452	Up
O95674	CDS2	4.91025e-06	0.000132138	0.52694	Down
O95747	OXSR1	0.012654	0.0218036	1.6082	Up
O95757	HSPA4L	0.000666001	0.00209949	0.309218	Down
O95782	AP2A1	5.89019e-05	0.000890253	0.325563	Down
O95793	STAU1	0.002664	0.00589823	2.73958	Up
O95831	AIFM1	0.012654	0.0218036	1.74356	Up
O95834	EML2	0.000666001	0.00209949	4.69527	Up
O95861	BPNT1	0.00830746	0.0152005	1.39834	Up
O95865	DDAH2	0.002664	0.00589823	4.28876	Up
O95881	TXNDC12	0.0114037	0.0203264	1.69993	Up
O95989	NUDT3	0.012654	0.0218036	0.343958	Down
O96000	NDUFB10	1.17409e-05	0.000255673	0.28082	Down
P00167	CYB5A	0.000666001	0.00209949	4.58302	Up
P00367	GLUD1	0.000666001	0.00209949	0.290482	Down
P00387	CYB5R3	0.012654	0.0218036	1.851	Up
P00403	MT-CO2	0.000666001	0.00209949	0.31806	Down
P00441	SOD1	0.027972	0.0437352	0.613011	Down
P00492	HPRT1	0.000666001	0.00209949	0.245937	Down
P00505	GOT2	8.84607e-13	1.46403e-09	0.197855	Down
P00533	EGFR	0.000666001	0.00209949	5.94321	Up
P00736	C1R	0.00464095	0.0094323	3.2814	Up
P00966	ASS1	0.000666001	0.00209949	8.87937	Up
P01008	SERPINC1	0.0196465	0.0319872	2.62825	Up
P01034	CST3	0.012654	0.0218036	0.325785	Down
P01112	HRAS	0.0143997	0.0243428	0.342154	Down
P01889	HLA-B	0.000666001	0.00209949	6.05443	Up
P01903	HLA-DRA	0.000666001	0.00209949	17.4182	Up
P02452	COL1A1	0.001332	0.00366494	7.54889	Up
P02461	COL3A1	0.002664	0.00589823	10.9392	Up
P02511	CRYAB	0.000666001	0.00209949	0.177543	Down
P02545	LMNA	0.000666001	0.00209949	9.10702	Up
P02686	MBP	0.000666001	0.00209949	0.0193177	Down
P02746	C1QB	0.027972	0.0437352	2.38905	Up
P02749	APOH	0.0254471	0.0407105	2.42483	Up
P02766	TTR	0.0105883	0.0189752	2.47785	Up
P02795	MT2A	0.000666001	0.00209949	0.145674	Down
P04075	ALDOA	3.49018e-05	0.000598575	0.390038	Down
P04080	CSTB	0.000177565	0.00205504	2.35762	Up
P04083	ANXA1	0.000666001	0.00209949	10.0696	Up
P04156	PRNP	5.99525e-05	0.000902012	0.145195	Down
P04179	SOD2	0.012654	0.0218036	0.498584	Down
P04216	THY1	0.000666001	0.00209949	0.0570893	Down
P04350	TUBB4A	1.42262e-06	5.47544e-05	0.21661	Down
P04406	GAPDH	2.52079e-05	0.000458452	0.538594	Down
P04439	HLA-A	1.15038e-05	0.00025385	3.82079	Up
P04632	CAPNS1	0.001332	0.00366494	2.88317	Up
P04732	MT1E	0.00466201	0.0094323	0.223074	Down
P04792	HSPB1	0.00029281	0.00209949	2.60384	Up
P04843	RPN1	0.000666001	0.00209949	4.53385	Up
P04844	RPN2	0.000666001	0.00209949	4.21364	Up
P05023	ATP1A1	8.36806e-07	3.74301e-05	0.284456	Down
P05026	ATP1B1	3.75791e-05	0.000631405	0.100418	Down
P05067	APP	0.0144575	0.024428	0.391096	Down
P05090	APOD	0.00306112	0.00667038	0.473476	Down
P05107	ITGB2	0.0312367	0.0484052	2.45204	Up
P05114	HMGN1	0.000666001	0.00209949	14.2031	Up
P05129	PRKCG	0.000666001	0.00209949	0.0187557	Down
P05141	SLC25A5	6.69034e-05	0.000992915	0.427736	Down
P05165	PCCA	0.00902124	0.0163887	0.675185	Down
P05198	EIF2S1	0.0023489	0.0055654	1.59059	Up
P05204	HMGN2	0.000666001	0.00209949	5.23175	Up
P05387	RPLP2	0.012654	0.0218036	2.40938	Up
P05388	RPLP0	2.32885e-07	1.43447e-05	2.87639	Up
P05413	FABP3	0.000666001	0.00209949	0.281948	Down
P05452	CLEC3B	0.000666001	0.00209949	12.4478	Up
P05455	SSB	0.000666001	0.00209949	4.35728	Up
P05546	SERPIND1	0.0233716	0.037755	3.2693	Up
P05556	ITGB1	2.23319e-07	1.43447e-05	3.92534	Up
P05771	PRKCB	0.000666001	0.00209949	0.122783	Down
P06132	UROD	0.000666001	0.00209949	2.75783	Up
P06241	FYN	0.002664	0.00589823	0.223298	Down
P06396	GSN	0.000666001	0.00209949	3.28907	Up
P06454	PTMA	0.017271	0.0288723	2.17303	Up
P06576	ATP5F1B	1.16673e-08	1.54475e-06	0.369456	Down
P06703	S100A6	0.00207199	0.00493756	2.6072	Up
P06730	EIF4E	0.0186473	0.0309553	1.25861	Up
P06737	PYGL	0.000666001	0.00209949	5.67141	Up
P06744	GPI	0.000202705	0.00209949	0.469457	Down
P06748	NPM1	0.000666001	0.00209949	3.29046	Up
P06865	HEXA	0.000666001	0.00209949	4.88016	Up
Q16778	H2BC21	0.000666001	0.00209949	3.86295	Up
P07099	EPHX1	0.001332	0.00366494	4.53837	Up
P07195	LDHB	0.012654	0.0218036	0.559997	Down
P07196	NEFL	0.000666001	0.00209949	0.0185289	Down
P07197	NEFM	0.000666001	0.00209949	0.00105119	Down
P07203	GPX1	0.00466201	0.0094323	1.68914	Up
P07237	P4HB	0.000666001	0.00209949	3.37252	Up
P07339	CTSD	0.000666001	0.00209949	0.555772	Down
P07355	ANXA2	0.000666001	0.00209949	17.1868	Up
P07357	C8A	0.027972	0.0437352	3.87696	Up
P07384	CAPN1	0.000666001	0.00209949	2.05366	Up
P07585	DCN	0.00799201	0.0146476	21.6687	Up
P07686	HEXB	0.000666001	0.00209949	3.94115	Up
P07737	PFN1	0.00179146	0.00466908	1.90469	Up
P07741	APRT	1.95965e-08	2.40239e-06	4.42939	Up
P07814	EPRS1	0.000680107	0.00213988	1.85787	Up
P07910	HNRNPC	0.000666001	0.00209949	2.65514	Up
P07919	UQCRH	0.000666001	0.00209949	0.159991	Down
P07942	LAMB1	0.000666001	0.00209949	15.6838	Up
P07951	TPM2	0.00466201	0.0094323	3.89671	Up
P07954	FH	0.000846656	0.002624	0.405973	Down
P08123	COL1A2	0.000666001	0.00209949	10.1957	Up
P08195	SLC3A2	0.000666001	0.00209949	0.103907	Down
P08237	PFKM	2.6938e-05	0.000481971	0.453294	Down
P08559	PDHA1	2.8743e-08	3.28066e-06	0.219132	Down
P08571	CD14	0.000666001	0.00209949	16.5254	Up
P08574	CYC1	0.000666001	0.00209949	0.286465	Down
P08621	SNRNP70	0.000666001	0.00209949	2.93804	Up
P08670	VIM	0.000666001	0.00209949	9.81038	Up
P08708	RPS17	4.73317e-08	4.34177e-06	3.43622	Up
P08754	GNAI3	0.00466201	0.0094323	2.13603	Up
P08758	ANXA5	0.000666001	0.00209949	4.78477	Up
P08865	RPSA	1.53499e-06	5.77364e-05	3.31955	Up
P09104	ENO2	0.000666001	0.00209949	0.0286991	Down
P09211	GSTP1	0.000666001	0.00209949	3.76382	Up
P09382	LGALS1	0.019314	0.0315594	1.79504	Up
P09417	QDPR	0.000666001	0.00209949	0.148847	Down
P09429	HMGB1	0.000666001	0.00209949	3.64526	Up
P09471	GNAO1	0.000666001	0.00209949	0.0072828	Down
P09496	CLTA	0.000666001	0.00209949	0.155587	Down
P09497	CLTB	7.27466e-05	0.00103344	0.34621	Down
P09525	ANXA4	0.000666001	0.00209949	11.6455	Up
P09543	CNP	0.000666001	0.00209949	0.0315136	Down
P09622	DLD	0.000205881	0.00209949	0.389238	Down
P09651	HNRNPA1	0.000666001	0.00209949	2.94865	Up
P09669	COX6C	0.000666001	0.00209949	0.220434	Down
P09874	PARP1	0.000666001	0.00209949	3.31181	Up
P09936	UCHL1	0.00189604	0.00477501	0.210188	Down
P09960	LTA4H	0.000666001	0.00209949	2.27107	Up
P09972	ALDOC	0.000666001	0.00209949	0.0770494	Down
Q71UI9	H2AZ2	0.000147665	0.00181874	2.45121	Up
Q99878	H2AC14	0.002664	0.00589823	2.86212	Up
P0DMV9	HSPA1B	0.027972	0.0437352	1.69535	Up
P0DN76	U2AF5	0.000666001	0.00209949	4.76614	Up
P0DP25	CALM3	0.000666001	0.00209949	0.366068	Down
P10114	RAP2A	0.000666001	0.00209949	0.10372	Down
P10155	RO60	3.09827e-08	3.30815e-06	4.23458	Up
P10301	RRAS	0.000666001	0.00209949	3.03824	Up
P10515	DLAT	0.00020995	0.00209949	0.25568	Down
P10606	COX5B	0.000666001	0.00209949	0.218317	Down
P10619	CTSA	0.002664	0.00589823	2.67719	Up
P10644	PRKAR1A	0.00757712	0.0143974	1.30887	Up
P10809	HSPD1	1.14257e-05	0.000253819	0.502195	Down
P11021	HSPA5	0.000666001	0.00209949	2.36361	Up
P11047	LAMC1	0.000405058	0.00209949	2.80907	Up
P11137	MAP2	0.000666001	0.00209949	0.00382701	Down
P11142	HSPA8	0.000666001	0.00209949	0.534984	Down
P11172	UMPS	0.000666001	0.00209949	3.98595	Up
P11177	PDHB	8.0573e-05	0.00110205	0.2386	Down
P11182	DBT	0.0190277	0.0314594	0.483254	Down
P11216	PYGB	0.0211107	0.0342195	0.636234	Down
P11217	PYGM	0.001332	0.00366494	0.112443	Down
P11233	RALA	0.000666001	0.00209949	0.272836	Down
P11234	RALB	0.0183535	0.030543	0.752445	Down
P11387	TOP1	0.002664	0.00589823	2.67879	Up
P11413	G6PD	0.002664	0.00589823	2.41381	Up
P11717	IGF2R	0.012654	0.0218036	2.65073	Up
P11766	ADH5	0.000169578	0.00200527	1.94002	Up
P11940	PABPC1	0.000170236	0.00200527	1.91752	Up
P12004	PCNA	0.000666001	0.00209949	4.19663	Up
P12074	COX6A1	0.001332	0.00366494	0.257881	Down
P12081	HARS1	0.0257996	0.0412146	1.47063	Up
P12109	COL6A1	0.000666001	0.00209949	21.2415	Up
P12110	COL6A2	0.000666001	0.00209949	25.1856	Up
P12111	COL6A3	0.000666001	0.00209949	22.4592	Up
P12235	SLC25A4	0.000666001	0.00209949	0.131871	Down
P12236	SLC25A6	0.000666001	0.00209949	0.209752	Down
P12268	IMPDH2	7.67935e-09	1.23732e-06	4.90174	Up
P12270	TPR	0.000666001	0.00209949	4.5291	Up
P12277	CKB	0.000666001	0.00209949	0.0264816	Down
P12429	ANXA3	0.027972	0.0437352	6.23185	Up
P12532	CKMT1A	0.000666001	0.00209949	0.0183587	Down
P12956	XRCC6	0.000666001	0.00209949	3.51348	Up
P13010	XRCC5	0.000666001	0.00209949	3.88274	Up
P13073	COX4I1	0.000666001	0.00209949	0.23367	Down
P13489	RNH1	0.000666001	0.00209949	2.21502	Up
P13591	NCAM1	0.000666001	0.00209949	0.0468585	Down
P13611	VCAN	0.019314	0.0315594	0.610073	Down
P13637	ATP1A3	0.000666001	0.00209949	0.0105963	Down
P13639	EEF2	5.04658e-06	0.000134313	2.35209	Up
P13667	PDIA4	0.000666001	0.00209949	5.87573	Up
P13671	C6	0.0127637	0.0219698	2.63377	Up
P13796	LCP1	0.000691368	0.00217325	3.06351	Up
P13807	GYS1	0.00169092	0.00442797	2.0335	Up
P14136	GFAP	0.000666001	0.00209949	0.00535166	Down
P14314	PRKCSH	0.000666001	0.00209949	2.28003	Up
P14317	HCLS1	0.000666001	0.00209949	8.4464	Up
P14406	COX7A2	0.000922313	0.00283196	0.226227	Down
P14415	ATP1B2	0.000666001	0.00209949	0.0248204	Down
P14543	NID1	0.027972	0.0437352	2.16361	Up
P14550	AKR1A1	0.000666001	0.00209949	2.26107	Up
P14625	HSP90B1	0.000666001	0.00209949	2.82131	Up
P63162	SNRPN	0.000666001	0.00209949	3.7269	Up
P14854	COX6B1	0.002664	0.00589823	0.261353	Down
P14866	HNRNPL	2.38356e-07	1.43447e-05	2.62173	Up
P14868	DARS1	0.00620483	0.0123203	1.47241	Up
P14923	JUP	0.00466201	0.0094323	10.4266	Up
P14927	UQCRB	0.000118987	0.00151479	0.20854	Down
P15104	GLUL	0.012654	0.0218036	0.188479	Down
P15144	ANPEP	0.001332	0.00366494	31.2934	Up
P15880	RPS2	0.000666001	0.00209949	3.65228	Up
P15924	DSP	0.00466201	0.0094323	37.1094	Up
P15954	COX7C	0.000666001	0.00209949	0.287596	Down
P16104	H2AX	0.000666001	0.00209949	6.02489	Up
P16298	PPP3CB	0.000666001	0.00209949	0.115034	Down
P16615	ATP2A2	0.000666001	0.00209949	0.304716	Down
P16949	STMN1	0.000666001	0.00209949	0.113333	Down
P16989	YBX3	0.000666001	0.00209949	10.6954	Up
P17174	GOT1	0.000666001	0.00209949	0.118965	Down
P17252	PRKCA	9.61621e-06	0.000219515	0.387217	Down
P17302	GJA1	0.000666001	0.00209949	0.165433	Down
P17568	NDUFB7	0.000666001	0.00209949	0.25334	Down
P17600	SYN1	0.000666001	0.00209949	0.00150807	Down
P17655	CAPN2	0.001332	0.00366494	5.24838	Up
P17844	DDX5	0.000666001	0.00209949	2.97832	Up
P17858	PFKL	0.0087703	0.0159679	0.785468	Down
P17931	LGALS3	0.000666001	0.00209949	3.8406	Up
P17980	PSMC3	0.000666001	0.00209949	1.43484	Up
P17987	TCP1	0.0182875	0.0304485	0.786252	Down
P18085	ARF4	0.00466201	0.0094323	2.63765	Up
P18124	RPL7	0.00799201	0.0146476	2.02568	Up
P18206	VCL	0.00799201	0.0146476	2.94342	Up
P18621	RPL17	0.000666001	0.00209949	2.95859	Up
P18669	PGAM1	0.0301068	0.0468737	0.679527	Down
P18859	ATP5PF	3.53552e-07	1.92101e-05	0.268744	Down
P19338	NCL	0.000666001	0.00209949	3.35187	Up
P19367	HK1	0.000666001	0.00209949	0.107509	Down
P19404	NDUFV2	1.59891e-05	0.000322706	0.226988	Down
P19525	EIF2AK2	0.000288621	0.00209949	1.89887	Up
P19623	SRM	0.000666001	0.00209949	2.64831	Up
P19634	SLC9A1	0.012654	0.0218036	0.525514	Down
P19971	TYMP	0.000666001	0.00209949	15.2509	Up
P20020	ATP2B1	0.000666001	0.00209949	0.0475468	Down
P20042	EIF2S2	0.00173715	0.00453826	1.71847	Up
P20073	ANXA7	0.001332	0.00366494	1.54345	Up
P20340	RAB6A	0.001332	0.00366494	0.201338	Down
P20618	PSMB1	0.000877956	0.00270833	1.58608	Up
P20645	M6PR	0.00466201	0.0094323	2.04297	Up
P20674	COX5A	0.000666001	0.00209949	0.242148	Down
P20700	LMNB1	0.000666001	0.00209949	3.28786	Up
P20774	OGN	0.000666001	0.00209949	27.1967	Up
P20810	CAST	0.001332	0.00366494	2.96479	Up
P21281	ATP6V1B2	0.000666001	0.00209949	0.106745	Down
P21283	ATP6V1C1	0.000666001	0.00209949	0.0673754	Down
P21291	CSRP1	0.0167372	0.0280224	0.502537	Down
P21333	FLNA	0.027972	0.0437352	2.63687	Up
P21399	ACO1	0.000666001	0.00209949	3.02199	Up
P21579	SYT1	0.000666001	0.00209949	0.00140127	Down
P21589	NT5E	0.012654	0.0218036	12.7099	Up
P21796	VDAC1	4.43741e-08	4.19653e-06	0.252372	Down
P21810	BGN	0.000666001	0.00209949	29.195	Up
P21912	SDHB	8.00679e-06	0.000189699	0.374565	Down
P21926	CD9	0.000666001	0.00209949	0.391148	Down
P21980	TGM2	0.012654	0.0218036	7.00121	Up
P22059	OSBP	0.001332	0.00366494	1.6217	Up
P22061	PCMT1	0.000666001	0.00209949	0.251495	Down
P22087	FBL	0.000666001	0.00209949	5.13905	Up
P22102	GART	7.35725e-06	0.000177755	2.97138	Up
P22105	TNXB	0.00466201	0.0094323	21.9722	Up
P22307	SCP2	0.0146946	0.0247905	1.5506	Up
P22314	UBA1	0.030738	0.0477218	1.30914	Up
P22392	NME2	0.002664	0.00589823	2.05524	Up
P22570	FDXR	0.000666001	0.00209949	3.8908	Up
P22626	HNRNPA2B1	0.000666001	0.00209949	2.5521	Up
P22694	PRKACB	9.06517e-06	0.000208373	0.359478	Down
P22695	UQCRC2	1.54362e-05	0.000315393	0.293222	Down
P22830	FECH	0.0145705	0.0246063	0.498759	Down
P23142	FBLN1	0.00466201	0.0094323	9.00377	Up
P23246	SFPQ	0.000666001	0.00209949	2.68222	Up
P23258	TUBG1	3.53941e-05	0.00060183	2.60924	Up
P23284	PPIB	0.000666001	0.00209949	3.02817	Up
P23396	RPS3	1.07836e-08	1.48724e-06	3.92335	Up
P23526	AHCY	8.05392e-05	0.00110205	1.87925	Up
P23528	CFL1	0.00276662	0.00611315	0.670427	Down
P23634	ATP2B4	0.000329969	0.00209949	0.334956	Down
P24539	ATP5PB	1.37479e-09	4.8584e-07	0.341448	Down
P24666	ACP1	0.027972	0.0437352	0.63536	Down
P24844	MYL9	0.00799201	0.0146476	4.2848	Up
P25098	GRK2	0.002664	0.00589823	0.435804	Down
P25398	RPS12	5.42698e-05	0.000835502	2.4225	Up
P25685	DNAJB1	0.00517282	0.010377	1.57488	Up
P25705	ATP5F1A	0.000666001	0.00209949	0.307521	Down
P25786	PSMA1	0.00148811	0.00406407	1.65829	Up
P25787	PSMA2	0.000379156	0.00209949	1.71045	Up
P25788	PSMA3	0.00325226	0.00704515	1.44062	Up
P25789	PSMA4	0.001332	0.00366494	1.61369	Up
P26038	MSN	7.8758e-07	3.57108e-05	2.94647	Up
P26232	CTNNA2	0.000666001	0.00209949	0.0294482	Down
P26368	U2AF2	0.000666001	0.00209949	4.15623	Up
P26373	RPL13	0.002664	0.00589823	2.52093	Up
P26440	IVD	0.002664	0.00589823	1.83668	Up
P26583	HMGB2	0.0064966	0.0127998	2.50354	Up
P26599	PTBP1	0.000666001	0.00209949	13.1793	Up
P26639	TARS1	0.000666001	0.00209949	2.03839	Up
P26640	VARS1	0.000666001	0.00209949	2.37577	Up
P26641	EEF1G	0.00158843	0.00418274	1.4911	Up
P26885	FKBP2	0.00799201	0.0146476	1.65933	Up
P27348	YWHAQ	0.000666001	0.00209949	0.494585	Down
P27635	RPL10	6.09802e-06	0.000148415	2.57043	Up
P27694	RPA1	0.000666001	0.00209949	5.20648	Up
P27695	APEX1	0.000666001	0.00209949	6.35432	Up
P27708	CAD	0.000666001	0.00209949	23.9078	Up
P27797	CALR	0.000666001	0.00209949	2.87385	Up
P27816	MAP4	0.027972	0.0437352	1.62892	Up
P27824	CANX	0.000666001	0.00209949	1.54262	Up
P28062	PSMB8	0.000666001	0.00209949	8.56657	Up
P28066	PSMA5	0.000485651	0.00209949	1.85957	Up
P28070	PSMB4	0.001332	0.00366494	1.54686	Up
P28289	TMOD1	0.012654	0.0218036	4.44253	Up
P28331	NDUFS1	1.93944e-05	0.000382116	0.246666	Down
P28482	MAPK1	0.000666001	0.00209949	0.274801	Down
P28799	GRN	0.027972	0.0437352	2.67515	Up
P28838	LAP3	0.000598706	0.00209949	2.19351	Up
P29218	IMPA1	0.00240937	0.00570051	0.319151	Down
P29373	CRABP2	0.000666001	0.00209949	29.3853	Up
P29401	TKT	0.00627588	0.0124316	1.61909	Up
P29590	PML	0.000666001	0.00209949	22.3634	Up
P29692	EEF1D	7.37876e-07	3.39218e-05	2.39118	Up
P29992	GNA11	0.00964986	0.0173781	1.46759	Up
P30038	ALDH4A1	0.000666001	0.00209949	0.192877	Down
P30040	ERP29	0.000666001	0.00209949	1.83358	Up
P30048	PRDX3	0.001332	0.00366494	0.568532	Down
P30049	ATP5F1D	0.00543921	0.0108916	0.303385	Down
P30050	RPL12	2.79174e-06	8.66225e-05	2.73987	Up
P30084	ECHS1	0.000446398	0.00209949	0.577219	Down
P30086	PEBP1	0.00675904	0.0132774	0.49088	Down
P30101	PDIA3	0.000666001	0.00209949	3.40664	Up
P30153	PPP2R1A	0.000666001	0.00209949	0.501681	Down
P30405	PPIF	0.0210097	0.0340726	0.489389	Down
P30519	HMOX2	0.000666001	0.00209949	0.338006	Down
P30520	ADSS2	0.0245787	0.0393783	0.677095	Down
P30533	LRPAP1	0.002664	0.00589823	3.1047	Up
P30626	SRI	0.0126166	0.0218036	0.592215	Down
P30740	SERPINB1	0.002664	0.00589823	7.32642	Up
P30876	POLR2B	0.000666001	0.00209949	6.70274	Up
P31040	SDHA	2.6402e-05	0.000475764	0.476548	Down
P31146	CORO1A	0.0058766	0.0117178	0.570679	Down
P31150	GDI1	0.000666001	0.00209949	0.162961	Down
P31323	PRKAR2B	3.35365e-06	9.88929e-05	0.203893	Down
P31749	AKT1	0.000666001	0.00209949	2.59458	Up
P31930	UQCRC1	1.58657e-09	4.8584e-07	0.192075	Down
P31937	HIBADH	0.00466201	0.0094323	2.06385	Up
P31939	ATIC	0.0273096	0.0434799	1.47604	Up
P31942	HNRNPH3	7.41895e-05	0.00104943	2.50134	Up
P31943	HNRNPH1	0.000666001	0.00209949	2.86055	Up
P31946	YWHAB	0.000666001	0.00209949	0.434604	Down
P31949	S100A11	0.001332	0.00366494	10.35	Up
P32969	RPL9	5.82431e-07	2.92098e-05	3.3968	Up
P33176	KIF5B	0.000666001	0.00209949	1.97779	Up
P33240	CSTF2	2.04094e-05	0.000399735	3.39651	Up
P33316	DUT	0.0264682	0.0422419	1.46465	Up
P34897	SHMT2	0.00466201	0.0094323	2.32825	Up
P35080	PFN2	0.00239951	0.00568125	0.451429	Down
P35221	CTNNA1	0.000666001	0.00209949	8.95535	Up
P35232	PHB1	0.00869989	0.0158538	0.677962	Down
P35237	SERPINB6	0.00484827	0.00978522	2.92714	Up
P35241	RDX	0.00284247	0.00623498	1.72166	Up
P35270	SPR	0.012654	0.0218036	2.64382	Up
P35555	FBN1	0.000666001	0.00209949	27.6189	Up
P35556	FBN2	0.000666001	0.00209949	95.8463	Up
P35579	MYH9	0.019314	0.0315594	2.72699	Up
P35606	COPB2	0.000666001	0.00209949	3.57273	Up
P35612	ADD2	0.000666001	0.00209949	0.0930113	Down
P35613	BSG	0.00193835	0.00477501	0.57923	Down
P35637	FUS	0.000666001	0.00209949	2.65549	Up
P35658	NUP214	0.000666001	0.00209949	4.50543	Up
P35749	MYH11	0.012654	0.0218036	7.63271	Up
P35998	PSMC2	0.000666001	0.00209949	1.45907	Up
P36542	ATP5F1C	0.000396845	0.00209949	0.377867	Down
P36543	ATP6V1E1	0.000666001	0.00209949	0.112932	Down
P36578	RPL4	0.002664	0.00589823	2.00621	Up
P36915	GNL1	0.014201	0.0240436	0.555076	Down
P36955	SERPINF1	0.00466201	0.0094323	6.36574	Up
P36957	DLST	8.13956e-06	0.000191078	0.378543	Down
P36969	GPX4	0.027397	0.0435981	0.690207	Down
P37108	SRP14	0.000666001	0.00209949	3.63202	Up
P37198	NUP62	0.000666001	0.00209949	2.85329	Up
P37802	TAGLN2	0.00849057	0.0154927	2.71721	Up
P37837	TALDO1	3.44635e-05	0.000594136	1.74612	Up
P37840	SNCA	0.000666001	0.00209949	0.0614404	Down
P38159	RBMX	0.000666001	0.00209949	3.51615	Up
P38606	ATP6V1A	0.000666001	0.00209949	0.109004	Down
P38646	HSPA9	0.00799201	0.0146476	0.613929	Down
P38919	EIF4A3	0.000666001	0.00209949	3.0822	Up
P39019	RPS19	3.49549e-06	0.000100609	2.79118	Up
P39023	RPL3	6.96289e-05	0.00101084	2.16121	Up
P39060	COL18A1	0.00466201	0.0094323	5.52803	Up
P39656	DDOST	2.15322e-09	5.48243e-07	3.94654	Up
P39687	ANP32A	0.00451385	0.0094323	2.22565	Up
P40121	CAPG	0.000666001	0.00209949	4.5763	Up
P40123	CAP2	0.000666001	0.00209949	0.114282	Down
P40227	CCT6A	0.0231219	0.0373699	0.805686	Down
P40429	RPL13A	0.00253038	0.00583662	1.76426	Up
P40616	ARL1	0.000666001	0.00209949	3.37116	Up
P40763	STAT3	5.67343e-09	1.10465e-06	3.86191	Up
P40925	MDH1	0.000666001	0.00209949	0.297503	Down
P40926	MDH2	8.25474e-05	0.00112441	0.253126	Down
P40939	HADHA	0.00799201	0.0146476	1.79044	Up
P41091	EIF2S3	0.000666001	0.00209949	1.70019	Up
P41240	CSK	0.00276602	0.00611315	2.07688	Up
P41250	GARS1	0.00103211	0.00299412	0.522598	Down
P41252	IARS1	0.001332	0.00366494	1.93663	Up
P41567	EIF1	0.000161556	0.0019375	2.35903	Up
P42025	ACTR1B	0.0033005	0.00713563	0.664748	Down
P42126	ECI1	0.002664	0.00589823	3.66275	Up
P42167	TMPO	0.000666001	0.00209949	3.99851	Up
P42224	STAT1	0.001332	0.00366494	2.74022	Up
P42226	STAT6	2.76792e-08	3.27208e-06	6.25026	Up
P42566	EPS15	0.000892817	0.00274904	2.55563	Up
P42658	DPP6	0.000666001	0.00209949	0.00760345	Down
P42677	RPS27	0.000363328	0.00209949	1.87603	Up
P42785	PRCP	0.000165321	0.00197549	2.16935	Up
P42858	HTT	0.0018977	0.00477501	0.294334	Down
P43004	SLC1A2	0.000666001	0.00209949	0.00179119	Down
P43034	PAFAH1B1	0.000467996	0.00209949	0.569155	Down
P43121	MCAM	0.002664	0.00589823	6.26079	Up
P43155	CRAT	7.85004e-09	1.23732e-06	0.332098	Down
P43243	MATR3	0.00152725	0.00410187	1.6655	Up
P43304	GPD2	0.000901057	0.00277184	0.426546	Down
P43490	NAMPT	0.019314	0.0315594	2.55547	Up
P43686	PSMC4	9.73255e-07	4.18373e-05	1.91772	Up
P43897	TSFM	0.00466201	0.0094323	0.487296	Down
P45880	VDAC2	0.000666001	0.00209949	0.37607	Down
P45985	MAP2K4	0.000666001	0.00209949	0.326857	Down
P46063	RECQL	0.000666001	0.00209949	7.92253	Up
P46108	CRK	0.000330452	0.00209949	1.77037	Up
P46459	NSF	0.000666001	0.00209949	0.113133	Down
P46736	BRCC3	0.00466037	0.0094323	1.67298	Up
P46777	RPL5	0.000666001	0.00209949	2.52682	Up
P46778	RPL21	1.06654e-06	4.46866e-05	3.5788	Up
P46779	RPL28	0.000666001	0.00209949	3.38026	Up
P46781	RPS9	0.000666001	0.00209949	2.68317	Up
P46782	RPS5	0.000666001	0.00209949	3.08844	Up
P46783	RPS10	0.000666001	0.00209949	2.76311	Up
P46821	MAP1B	0.001332	0.00366494	0.343026	Down
P46939	UTRN	0.000666001	0.00209949	7.06214	Up
P46940	IQGAP1	0.000666001	0.00209949	10.0548	Up
P46976	GYG1	0.019314	0.0315594	2.05172	Up
P46977	STT3A	0.000666001	0.00209949	9.5793	Up
P47813	EIF1AX	9.9746e-06	0.000224598	1.60093	Up
P47897	QARS1	2.92185e-05	0.00051171	3.26766	Up
P47985	UQCRFS1	0.000666001	0.00209949	0.235812	Down
P48047	ATP5PO	4.84413e-05	0.000759908	0.341749	Down
P48059	LIMS1	0.012654	0.0218036	2.06402	Up
P48426	PIP4K2A	0.00799201	0.0146476	0.471332	Down
P48444	ARCN1	0.000666001	0.00209949	3.76772	Up
P48556	PSMD8	0.00986467	0.0177457	1.60638	Up
P48643	CCT5	0.0134782	0.0230916	0.789371	Down
P48681	NES	0.024822	0.0397296	1.92054	Up
P48735	IDH2	0.000666001	0.00209949	0.112203	Down
P48739	PITPNB	0.0274557	0.0436667	0.815889	Down
P49257	LMAN1	0.000666001	0.00209949	4.88401	Up
P49327	FASN	0.00963573	0.0173621	0.652283	Down
P49354	FNTA	0.002664	0.00589823	2.70404	Up
P49411	TUFM	0.00386576	0.00830046	0.675114	Down
P49418	AMPH	0.000666001	0.00209949	0.00142392	Down
P49458	SRP9	0.000666001	0.00209949	2.61202	Up
P49588	AARS1	0.0163396	0.0273844	0.700883	Down
P49589	CARS1	0.03194	0.0494026	0.587683	Down
P49720	PSMB3	0.000666001	0.00209949	2.09917	Up
P49721	PSMB2	0.000666001	0.00209949	1.86302	Up
P49748	ACADVL	0.00799201	0.0146476	2.06876	Up
P49750	YLPM1	0.00799201	0.0146476	2.50869	Up
P49755	TMED10	0.000666001	0.00209949	3.51468	Up
P49773	HINT1	0.00465847	0.0094323	0.483971	Down
P49821	NDUFV1	2.31175e-11	1.74115e-08	0.28872	Down
P49840	GSK3A	0.002664	0.00589823	0.286662	Down
P49841	GSK3B	0.000666001	0.00209949	0.191735	Down
P49902	NT5C2	0.00799201	0.0146476	6.75476	Up
P49903	SEPHS1	0.000666001	0.00209949	6.19045	Up
P49915	GMPS	0.00395491	0.00847846	1.5133	Up
P50135	HNMT	0.00466201	0.0094323	4.82971	Up
P50148	GNAQ	0.00132504	0.00366494	0.44594	Down
P50213	IDH3A	0.000666001	0.00209949	0.201207	Down
P50225	SULT1A1	0.000666001	0.00209949	16.1574	Up
P50238	CRIP1	0.000666001	0.00209949	15.5667	Up
P50402	EMD	0.000193162	0.00209949	2.33306	Up
P50453	SERPINB9	0.000666001	0.00209949	5.69869	Up
P50454	SERPINH1	0.000666001	0.00209949	28.3724	Up
P50552	VASP	0.012654	0.0218036	2.96944	Up
P50570	DNM2	0.000666001	0.00209949	2.20953	Up
P50579	METAP2	0.00183543	0.0047724	2.13289	Up
P50895	BCAM	0.000666001	0.00209949	2.16743	Up
P50990	CCT8	0.0142474	0.0241098	0.776995	Down
P50993	ATP1A2	0.000666001	0.00209949	0.0612878	Down
P50995	ANXA11	1.87294e-06	6.73099e-05	2.91899	Up
P51114	FXR1	0.000666001	0.00209949	2.3588	Up
P51452	DUSP3	0.000666001	0.00209949	0.423836	Down
P51553	IDH3G	0.000666001	0.00209949	0.180647	Down
P51570	GALK1	0.002553	0.00588061	1.84779	Up
P51571	SSR4	0.000666001	0.00209949	3.81761	Up
P51572	BCAP31	0.002664	0.00589823	1.78228	Up
P51608	MECP2	0.00017471	0.00203623	2.43462	Up
P51610	HCFC1	2.55439e-07	1.50983e-05	5.1608	Up
P51648	ALDH3A2	0.001332	0.00366494	3.82917	Up
P51649	ALDH5A1	4.36508e-11	2.40807e-08	0.133076	Down
P51665	PSMD7	0.00167767	0.00439675	1.55488	Up
P51692	STAT5B	0.000666001	0.00209949	5.93909	Up
P51812	RPS6KA3	0.002664	0.00589823	2.04283	Up
P51858	HDGF	0.002664	0.00589823	4.49154	Up
P51884	LUM	0.00799201	0.0146476	20.533	Up
P51888	PRELP	0.001332	0.00366494	27.587	Up
P51970	NDUFA8	7.03025e-05	0.00101616	0.31206	Down
P51991	HNRNPA3	0.00267062	0.00590893	2.23293	Up
P52272	HNRNPM	0.000666001	0.00209949	3.77391	Up
P52294	KPNA1	0.00167037	0.00438107	1.73954	Up
P52306	RAP1GDS1	0.000666001	0.00209949	0.179276	Down
P52566	ARHGDIB	0.00466201	0.0094323	2.95579	Up
P52597	HNRNPF	0.000666001	0.00209949	7.74477	Up
P52788	SMS	0.00420857	0.00888983	0.403431	Down
P52907	CAPZA1	0.001332	0.00366494	1.62774	Up
P53007	SLC25A1	0.000666001	0.00209949	3.39844	Up
P53041	PPP5C	0.001332	0.00366494	0.482349	Down
P53367	ARFIP1	2.02051e-06	6.96654e-05	3.08716	Up
P53597	SUCLG1	3.30579e-07	1.85461e-05	0.426301	Down
P53618	COPB1	0.000666001	0.00209949	5.58595	Up
P53621	COPA	0.000666001	0.00209949	4.85582	Up
P53680	AP2S1	4.13116e-07	2.1705e-05	0.249023	Down
P53779	MAPK10	0.000666001	0.00209949	0.161386	Down
P53990	IST1	0.019314	0.0315594	1.79574	Up
P53992	SEC24C	0.001332	0.00366494	2.05244	Up
P53999	SUB1	0.012654	0.0218036	1.95046	Up
P54136	RARS1	0.000666001	0.00209949	1.86559	Up
P54289	CACNA2D1	0.012654	0.0218036	0.321754	Down
P54652	HSPA2	0.00799201	0.0146476	0.297115	Down
P54709	ATP1B3	0.001332	0.00366494	3.64247	Up
P54727	RAD23B	0.019314	0.0315594	2.08436	Up
P54750	PDE1A	0.00255767	0.00588727	0.376495	Down
P54819	AK2	0.000666001	0.00209949	4.8304	Up
P54886	ALDH18A1	0.000666001	0.00209949	6.31961	Up
P54920	NAPA	1.02538e-06	4.35129e-05	0.512761	Down
P55060	CSE1L	0.000666001	0.00209949	1.61818	Up
P55072	VCP	0.00799201	0.0146476	1.53133	Up
P55084	HADHB	0.00799201	0.0146476	1.79144	Up
P55263	ADK	0.000666001	0.00209949	2.99576	Up
P55265	ADAR	0.000666001	0.00209949	3.16575	Up
P55268	LAMB2	0.00643167	0.0126959	1.85035	Up
P55327	TPD52	0.000666001	0.00209949	0.0954056	Down
P55735	SEC13	0.000666001	0.00209949	3.00877	Up
P55786	NPEPPS	0.012654	0.0218036	0.648502	Down
P55809	OXCT1	2.80965e-05	0.000497322	0.207024	Down
P55884	EIF3B	2.99136e-07	1.70714e-05	2.64281	Up
P56134	ATP5MF	0.00162091	0.0042615	0.452525	Down
P56199	ITGA1	0.000666001	0.00209949	51.5101	Up
P56211	ARPP19	0.00466201	0.0094323	0.202062	Down
P56537	EIF6	5.39712e-06	0.000140665	2.15094	Up
P56545	CTBP2	2.64473e-05	0.000475764	3.76701	Up
P56556	NDUFA6	2.75444e-05	0.000490172	0.250373	Down
P57737	CORO7	0.012654	0.0218036	2.48042	Up
P57772	EEFSEC	0.000530392	0.00209949	1.92861	Up
P60174	TPI1	0.00482463	0.00974941	0.67616	Down
P60201	PLP1	0.000666001	0.00209949	0.00445088	Down
P60228	EIF3E	0.000666001	0.00209949	2.96218	Up
P60660	MYL6	0.000666001	0.00209949	3.03284	Up
P60842	EIF4A1	1.77657e-09	4.90038e-07	3.51838	Up
P60866	RPS20	0.000666001	0.00209949	2.3248	Up
P60880	SNAP25	0.000666001	0.00209949	0.00433171	Down
P60900	PSMA6	0.000666001	0.00209949	1.63958	Up
P60903	S100A10	0.000666001	0.00209949	23.4891	Up
P60983	GMFB	0.00541085	0.0108413	0.408039	Down
P61006	RAB8A	0.000138959	0.00173567	2.07163	Up
P61019	RAB2A	3.4095e-06	9.89952e-05	0.450454	Down
P61020	RAB5B	0.00355081	0.00765777	0.551604	Down
P61026	RAB10	0.00205813	0.00490808	0.668969	Down
P61088	UBE2N	0.00135317	0.00371702	0.567977	Down
P61106	RAB14	6.89981e-05	0.0010061	0.688308	Down
P61158	ACTR3	0.002664	0.00589823	1.5232	Up
P61163	ACTR1A	0.000243989	0.00209949	0.718204	Down
P61221	ABCE1	0.000412935	0.00209949	2.22279	Up
P61225	RAP2B	0.000666001	0.00209949	0.340357	Down
P61247	RPS3A	5.47323e-07	2.78713e-05	2.65409	Up
P61254	RPL26	0.000102214	0.00134792	2.12215	Up
P61313	RPL15	0.001332	0.00366494	2.1363	Up
P61326	MAGOH	0.000666001	0.00209949	2.56385	Up
P61353	RPL27	0.000666001	0.00209949	4.08933	Up
P61421	ATP6V0D1	0.000666001	0.00209949	0.0677633	Down
P61457	PCBD1	0.00174823	0.00456	2.82478	Up
P61513	RPL37A	3.41454e-05	0.000591735	2.91081	Up
P61604	HSPE1	0.001332	0.00366494	0.530412	Down
P61619	SEC61A1	0.000666001	0.00209949	3.95858	Up
P61764	STXBP1	0.000666001	0.00209949	0.0149888	Down
P61769	B2M	0.000666001	0.00209949	3.227	Up
P61923	COPZ1	0.001332	0.00366494	3.09615	Up
P61956	SUMO2	0.00799201	0.0146476	1.90566	Up
P61978	HNRNPK	1.10297e-06	4.4732e-05	2.70859	Up
P61981	YWHAG	0.000666001	0.00209949	0.201365	Down
P62072	TIMM10	1.32709e-06	5.22936e-05	0.279437	Down
P62081	RPS7	3.75547e-06	0.00010716	3.35953	Up
P62191	PSMC1	2.17029e-05	0.000415241	1.57513	Up
P62195	PSMC5	0.000666001	0.00209949	1.83804	Up
P62241	RPS8	0.00774943	0.0146476	1.85028	Up
P62244	RPS15A	0.000666001	0.00209949	3.197	Up
P62249	RPS16	8.19736e-06	0.000191079	3.32055	Up
P62258	YWHAE	0.00157164	0.00414182	0.508198	Down
P62263	RPS14	4.86253e-06	0.000131926	2.84588	Up
P62266	RPS23	0.000666001	0.00209949	3.67333	Up
P62269	RPS18	0.001332	0.00366494	3.11932	Up
P62277	RPS13	0.000666001	0.00209949	6.24465	Up
P62280	RPS11	0.000666001	0.00209949	2.9078	Up
P62304	SNRPE	0.000666001	0.00209949	4.11693	Up
P62306	SNRPF	0.000666001	0.00209949	3.06863	Up
P62314	SNRPD1	0.000195595	0.00209949	2.12371	Up
P62316	SNRPD2	0.002664	0.00589823	2.56624	Up
P62318	SNRPD3	0.000666001	0.00209949	3.29462	Up
P62333	PSMC6	0.012654	0.0218036	1.35704	Up
P62424	RPL7A	0.000666001	0.00209949	2.82325	Up
P62495	ETF1	5.07223e-06	0.000134313	2.4958	Up
P62633	CNBP	0.000666001	0.00209949	3.317	Up
P62701	RPS4X	0.000666001	0.00209949	4.26242	Up
P62714	PPP2CB	0.002664	0.00589823	0.524679	Down
P62750	RPL23A	0.000666001	0.00209949	2.30222	Up
P62760	VSNL1	0.000666001	0.00209949	0.00285802	Down
P62805	H4C1	0.000666001	0.00209949	3.12516	Up
P62820	RAB1A	0.002664	0.00589823	0.462256	Down
P62829	RPL23	1.89119e-06	6.73099e-05	3.71598	Up
P62841	RPS15	7.00067e-07	3.35829e-05	3.8928	Up
P62847	RPS24	0.00310281	0.00675032	2.46862	Up
P62851	RPS25	0.000666001	0.00209949	3.24758	Up
P62854	RPS26	0.00319387	0.0069232	2.71104	Up
P62857	RPS28	0.000145675	0.00180594	1.87691	Up
P62873	GNB1	0.000666001	0.00209949	0.150406	Down
P62879	GNB2	0.000626151	0.00209949	0.341392	Down
P62888	RPL30	0.000666001	0.00209949	2.1175	Up
P62906	RPL10A	1.56004e-06	5.80193e-05	2.79508	Up
P62910	RPL32	1.50248e-05	0.000308895	3.2648	Up
P62913	RPL11	0.000666001	0.00209949	1.87979	Up
P62917	RPL8	0.000843218	0.00261579	2.40411	Up
P62942	FKBP1A	0.0127861	0.0219969	0.510871	Down
P62993	GRB2	0.00095216	0.00290826	0.606933	Down
P62995	TRA2B	7.61921e-05	0.00107317	2.93202	Up
P63000	RAC1	0.000666001	0.00209949	0.32304	Down
P63010	AP2B1	5.46205e-06	0.000141245	0.314062	Down
P63027	VAMP2	0.000666001	0.00209949	0.0507386	Down
P63096	GNAI1	0.000666001	0.00209949	0.0529865	Down
P63098	PPP3R1	0.000666001	0.00209949	0.0624107	Down
P63104	YWHAZ	2.26933e-05	0.000427326	0.438887	Down
P63151	PPP2R2A	0.0135751	0.0232453	0.698713	Down
P63167	DYNLL1	0.000541576	0.00209949	0.442396	Down
P63173	RPL38	1.34756e-05	0.000284103	3.317	Up
P63208	SKP1	0.000666001	0.00209949	0.470081	Down
P63218	GNG5	0.000666001	0.00209949	2.31203	Up
P63220	RPS21	0.000204045	0.00209949	2.08158	Up
P63241	EIF5A	1.11993e-09	4.63369e-07	2.23365	Up
P63244	RACK1	5.30891e-06	0.000139464	2.67978	Up
P68104	EEF1A1	0.000666001	0.00209949	2.55083	Up
P68363	TUBA1B	0.000666001	0.00209949	0.223988	Down
P68431	H3C1	0.000666001	0.00209949	9.53132	Up
P69849	NOMO3	2.91032e-07	1.69003e-05	2.55317	Up
P78324	SIRPA	0.000666001	0.00209949	0.0320228	Down
P78344	EIF4G2	0.00328695	0.00711099	1.64988	Up
P78347	GTF2I	0.000666001	0.00209949	10.7446	Up
P78352	DLG4	0.000666001	0.00209949	0.00967579	Down
P78356	PIP4K2B	0.000666001	0.00209949	0.225813	Down
P78357	CNTNAP1	0.000666001	0.00209949	0.0122705	Down
P78527	PRKDC	0.000666001	0.00209949	4.731	Up
P78559	MAP1A	0.000666001	0.00209949	0.118408	Down
P80404	ABAT	0.000666001	0.00209949	0.0840734	Down
P80723	BASP1	0.000666001	0.00209949	0.0269193	Down
P82909	MRPS36	6.46596e-05	0.000968432	0.382097	Down
P82979	SARNP	0.000666001	0.00209949	2.47074	Up
P83731	RPL24	0.019314	0.0315594	3.28991	Up
P84074	HPCA	0.000666001	0.00209949	0.081015	Down
P84077	ARF1	0.000666001	0.00209949	0.435358	Down
P84085	ARF5	0.000666001	0.00209949	0.372565	Down
P84090	ERH	0.000666001	0.00209949	2.29966	Up
P84098	RPL19	0.000666001	0.00209949	3.42132	Up
P84103	SRSF3	0.002664	0.00589823	2.22001	Up
P84157	MXRA7	0.002664	0.00589823	4.32481	Up
P98160	HSPG2	0.000666001	0.00209949	7.6237	Up
P98179	RBM3	0.000666001	0.00209949	6.00895	Up
P99999	CYCS	0.000666001	0.00209949	0.212897	Down
Q00325	SLC25A3	5.58874e-08	4.72853e-06	0.355216	Down
Q00341	HDLBP	0.000666001	0.00209949	4.32722	Up
Q00535	CDK5	0.000666001	0.00209949	0.152297	Down
Q00610	CLTC	4.85334e-08	4.34177e-06	0.403036	Down
Q00765	REEP5	0.000111016	0.0014467	0.358411	Down
Q00839	HNRNPU	6.79089e-09	1.22157e-06	2.73482	Up
Q01082	SPTBN1	0.00595554	0.0118609	0.73206	Down
Q01085	TIAL1	9.21748e-07	4.06798e-05	2.73834	Up
Q01105	SET	0.000666001	0.00209949	4.49476	Up
Q01484	ANK2	0.000666001	0.00209949	0.101466	Down
Q01813	PFKP	0.000666001	0.00209949	0.17411	Down
Q01814	ATP2B2	0.000666001	0.00209949	0.00363874	Down
Q01844	EWSR1	4.05425e-07	2.16445e-05	3.32698	Up
Q01995	TAGLN	0.001332	0.00366494	11.9781	Up
Q02108	GUCY1A1	0.00466201	0.0094323	5.17101	Up
Q02218	OGDH	0.000394609	0.00209949	0.60304	Down
Q02252	ALDH6A1	0.019314	0.0315594	0.524501	Down
Q02338	BDH1	0.000666001	0.00209949	0.120162	Down
Q02750	MAP2K1	0.000666001	0.00209949	0.228377	Down
Q02790	FKBP4	0.006491	0.0127964	0.711436	Down
Q02818	NUCB1	0.000666001	0.00209949	2.79868	Up
Q02878	RPL6	0.000666001	0.00209949	2.02974	Up
Q02978	SLC25A11	2.63014e-11	1.74115e-08	0.341245	Down
Q03001	DST	0.001332	0.00366494	0.299002	Down
Q03135	CAV1	0.000666001	0.00209949	10.9344	Up
Q03154	ACY1	1.28613e-05	0.000274652	2.29337	Up
Q03252	LMNB2	0.000666001	0.00209949	2.62053	Up
Q04323	UBXN1	0.015039	0.0253329	1.9848	Up
Q04446	GBE1	0.000666001	0.00209949	3.24671	Up
Q04637	EIF4G1	7.22791e-07	3.36963e-05	2.65638	Up
Q04837	SSBP1	0.0171718	0.028721	0.549175	Down
Q04917	YWHAH	0.00138077	0.00378654	0.277898	Down
Q05639	EEF1A2	0.000666001	0.00209949	0.0245902	Down
Q05682	CALD1	0.000666001	0.00209949	7.66293	Up
Q05707	COL14A1	0.00799201	0.0146476	17.3175	Up
Q06124	PTPN11	0.00201629	0.00481177	0.481494	Down
Q06323	PSME1	0.000666001	0.00209949	4.05331	Up
Q06828	FMOD	0.000666001	0.00209949	40.5479	Up
Q07020	RPL18	0.0115867	0.0206082	1.65029	Up
Q07021	C1QBP	0.00929741	0.0168075	0.702035	Down
Q07065	CKAP4	0.000666001	0.00209949	7.70014	Up
Q07157	TJP1	0.000666001	0.00209949	3.93227	Up
Q07666	KHDRBS1	0.000666001	0.00209949	2.79801	Up
Q07866	KLC1	0.00799201	0.0146476	0.62985	Down
Q07954	LRP1	0.000666001	0.00209949	3.77792	Up
Q07955	SRSF1	0.00799201	0.0146476	2.5379	Up
Q08170	SRSF4	0.000666001	0.00209949	2.78416	Up
Q08209	PPP3CA	0.000666001	0.00209949	0.0715458	Down
Q08211	DHX9	0.000666001	0.00209949	2.7392	Up
Q08378	GOLGA3	0.00102457	0.00297746	2.29152	Up
Q08379	GOLGA2	7.75675e-05	0.00107588	3.0051	Up
Q08380	LGALS3BP	0.000666001	0.00209949	5.04209	Up
Q08495	DMTN	0.002664	0.00589823	0.15165	Down
Q08945	SSRP1	0.012654	0.0218036	2.40175	Up
Q09666	AHNAK	0.000666001	0.00209949	16.1005	Up
Q0VF96	CGNL1	0.00799201	0.0146476	21.7698	Up
Q10471	GALNT2	0.000666001	0.00209949	5.54135	Up
Q10567	AP1B1	0.00188781	0.00477501	0.649235	Down
Q10588	BST1	0.000666001	0.00209949	124.204	Up
Q12765	SCRN1	0.000666001	0.00209949	0.123842	Down
Q12768	WASHC5	0.0012408	0.00357756	2.05884	Up
Q12792	TWF1	0.000666001	0.00209949	2.74253	Up
Q12797	ASPH	0.000666001	0.00209949	6.02867	Up
Q12805	EFEMP1	0.001332	0.00366494	21.8181	Up
Q12846	STX4	0.0111717	0.0199559	1.59702	Up
Q12860	CNTN1	0.000666001	0.00209949	0.125471	Down
Q12874	SF3A3	0.000666001	0.00209949	3.19118	Up
Q12904	AIMP1	0.00449695	0.0094323	1.92651	Up
Q12905	ILF2	0.000666001	0.00209949	3.81257	Up
Q12906	ILF3	1.29878e-06	5.17946e-05	3.25185	Up
Q12907	LMAN2	0.000666001	0.00209949	4.46042	Up
Q12931	TRAP1	0.00791983	0.0146476	0.539809	Down
Q12955	ANK3	0.000666001	0.00209949	0.0941097	Down
Q12959	DLG1	9.7915e-06	0.000221985	0.408105	Down
Q12979	ABR	0.000666001	0.00209949	0.162886	Down
Q13045	FLII	0.000666001	0.00209949	4.23732	Up
Q13057	COASY	0.0072454	0.0137829	1.46557	Up
Q13126	MTAP	1.4872e-06	5.65818e-05	2.74214	Up
Q13131	PRKAA1	0.000666001	0.00209949	2.11846	Up
Q13148	TARDBP	0.000666001	0.00209949	2.67241	Up
Q13151	HNRNPA0	0.000666001	0.00209949	3.60877	Up
Q13153	PAK1	0.000666001	0.00209949	0.158691	Down
Q13155	AIMP2	0.000154422	0.00187327	2.55362	Up
Q13162	PRDX4	0.000666001	0.00209949	5.00378	Up
Q13177	PAK2	0.00587647	0.0117178	1.4486	Up
Q13185	CBX3	0.000666001	0.00209949	3.08893	Up
Q13200	PSMD2	0.00599445	0.0119241	1.52606	Up
Q13217	DNAJC3	0.000666001	0.00209949	3.08219	Up
Q13228	SELENBP1	0.000666001	0.00209949	3.22815	Up
Q13263	TRIM28	7.01202e-09	1.22157e-06	5.96899	Up
Q13283	G3BP1	0.000666001	0.00209949	4.49856	Up
Q13303	KCNAB2	0.000666001	0.00209949	0.0440193	Down
Q13310	PABPC4	4.82687e-05	0.000759908	2.68708	Up
Q13332	PTPRS	0.000666001	0.00209949	0.0515152	Down
Q13347	EIF3I	2.39265e-06	7.84125e-05	2.62943	Up
Q13363	CTBP1	9.06444e-09	1.36379e-06	0.407292	Down
Q13367	AP3B2	0.000666001	0.00209949	0.135032	Down
Q13418	ILK	0.00799201	0.0146476	2.98382	Up
Q13423	NNT	4.16196e-06	0.000115765	0.327916	Down
Q13425	SNTB2	0.001332	0.00366494	3.18306	Up
Q13435	SF3B2	0.000666001	0.00209949	3.62869	Up
Q13451	FKBP5	0.000666001	0.00209949	16.4349	Up
Q13492	PICALM	0.000191852	0.00209949	2.14284	Up
Q13501	SQSTM1	0.0145784	0.0246071	1.58257	Up
Q13509	TUBB3	0.000666001	0.00209949	0.0247312	Down
Q13526	PIN1	0.000666001	0.00209949	0.209706	Down
Q13554	CAMK2B	0.000666001	0.00209949	0.0232496	Down
Q13555	CAMK2G	0.000666001	0.00209949	0.0481276	Down
Q13557	CAMK2D	0.000666001	0.00209949	0.33722	Down
Q13561	DCTN2	0.00200014	0.00477667	0.557633	Down
Q13564	NAE1	0.00287964	0.00629981	1.62279	Up
Q13596	SNX1	0.00033728	0.00209949	1.84998	Up
Q13613	MTMR1	0.00466201	0.0094323	0.455084	Down
Q13614	MTMR2	0.001332	0.00366494	0.190293	Down
Q13617	CUL2	0.00551489	0.0110365	0.639786	Down
Q13618	CUL3	0.013582	0.0232453	0.729821	Down
Q13619	CUL4A	0.012654	0.0218036	1.43611	Up
Q13724	MOGS	0.000666001	0.00209949	3.04571	Up
Q13740	ALCAM	0.012654	0.0218036	4.28384	Up
Q13813	SPTAN1	0.001332	0.00366494	0.678564	Down
Q13838	DDX39B	0.000666001	0.00209949	3.66059	Up
Q13867	BLMH	0.0138045	0.0235961	1.40793	Up
Q13885	TUBB2A	0.000666001	0.00209949	0.103413	Down
Q14008	CKAP5	0.020639	0.0335042	0.693702	Down
Q14011	CIRBP	0.00466201	0.0094323	3.00439	Up
Q14103	HNRNPD	0.000666001	0.00209949	2.125	Up
Q14112	NID2	0.000666001	0.00209949	5.4068	Up
Q14141	SEPTIN6	7.72733e-05	0.00107588	0.293662	Down
Q14152	EIF3A	2.93687e-06	8.83731e-05	3.22286	Up
Q14155	ARHGEF7	3.54023e-07	1.92101e-05	0.382427	Down
Q14161	GIT2	0.000666001	0.00209949	3.92593	Up
Q14165	MLEC	0.000572326	0.00209949	2.34847	Up
Q14166	TTLL12	0.000666001	0.00209949	2.16097	Up
Q14185	DOCK1	0.000666001	0.00209949	3.03736	Up
Q14194	CRMP1	0.000666001	0.00209949	0.0329673	Down
Q14203	DCTN1	0.000666001	0.00209949	0.616834	Down
Q14204	DYNC1H1	0.00909144	0.0164621	0.603432	Down
Q14232	EIF2B1	0.0156232	0.0262635	1.48063	Up
Q14254	FLOT2	0.000666001	0.00209949	0.398262	Down
Q14315	FLNC	0.00466201	0.0094323	9.07747	Up
Q14318	FKBP8	0.00296553	0.00647061	0.582985	Down
Q14498	RBM39	0.000666001	0.00209949	7.28915	Up
Q14643	ITPR1	0.000666001	0.00209949	0.142258	Down
Q14677	CLINT1	0.00799201	0.0146476	1.87299	Up
Q14683	SMC1A	0.002664	0.00589823	3.59459	Up
Q14696	MESD	0.000666001	0.00209949	3.887	Up
Q14697	GANAB	0.000666001	0.00209949	3.2034	Up
Q14699	RFTN1	0.027972	0.0437352	0.56794	Down
Q14764	MVP	0.000666001	0.00209949	5.33526	Up
Q14839	CHD4	0.000666001	0.00209949	9.37576	Up
Q14914	PTGR1	0.000820471	0.00254894	1.88078	Up
Q14974	KPNB1	0.00257953	0.00589823	1.41633	Up
Q14980	NUMA1	0.000666001	0.00209949	7.35012	Up
Q15005	SPCS2	0.000666001	0.00209949	2.21086	Up
Q15008	PSMD6	0.000564923	0.00209949	1.62327	Up
Q15020	SART3	0.000666001	0.00209949	4.39804	Up
Q15029	EFTUD2	0.000666001	0.00209949	3.39143	Up
Q15036	SNX17	0.000117599	0.00150874	2.0068	Up
Q15042	RAB3GAP1	0.0198848	0.0323274	0.724224	Down
Q15046	KARS1	0.00962881	0.0173591	1.76585	Up
Q15057	ACAP2	0.000666001	0.00209949	3.02278	Up
Q15063	POSTN	0.00799201	0.0146476	63.8034	Up
Q15084	PDIA6	0.000666001	0.00209949	3.13343	Up
Q15120	PDK3	0.001332	0.00366494	0.31369	Down
Q15121	PEA15	0.00466201	0.0094323	0.327567	Down
Q15149	PLEC	0.002664	0.00589823	1.99411	Up
Q15233	NONO	0.000666001	0.00209949	2.96173	Up
Q15257	PTPA	0.000666001	0.00209949	0.621528	Down
Q15274	QPRT	0.000869557	0.00268492	3.51346	Up
Q15276	RABEP1	0.0161573	0.0271135	0.602214	Down
Q15286	RAB35	0.000666001	0.00209949	0.448501	Down
Q15293	RCN1	0.00466201	0.0094323	2.75296	Up
Q15334	LLGL1	0.000666001	0.00209949	0.405619	Down
Q15363	TMED2	0.000666001	0.00209949	5.13671	Up
Q15365	PCBP1	1.16192e-05	0.0002547	1.85887	Up
Q15366	PCBP2	0.002664	0.00589823	1.69657	Up
Q15393	SF3B3	0.000666001	0.00209949	3.7768	Up
Q15417	CNN3	0.027972	0.0437352	2.61562	Up
Q15424	SAFB	0.000666001	0.00209949	3.10488	Up
Q15436	SEC23A	0.000666001	0.00209949	2.64998	Up
Q15437	SEC23B	0.000666001	0.00209949	3.73492	Up
Q15459	SF3A1	0.000666001	0.00209949	3.80041	Up
Q15555	MAPRE2	0.000666001	0.00209949	0.0888236	Down
Q15582	TGFBI	0.000666001	0.00209949	22.3759	Up
Q15631	TSN	2.32861e-05	0.000430598	2.5243	Up
Q15637	SF1	1.98824e-06	6.92745e-05	3.37369	Up
Q15691	MAPRE1	0.000666001	0.00209949	1.55909	Up
Q15700	DLG2	0.000666001	0.00209949	0.0702389	Down
Q15714	TSC22D1	0.0282716	0.0441794	0.47937	Down
Q15785	TOMM34	0.0138614	0.0236745	1.4892	Up
Q15811	ITSN1	0.00628989	0.0124444	0.644691	Down
Q15819	UBE2V2	0.00245827	0.0058079	0.525828	Down
Q15836	VAMP3	0.000666001	0.00209949	2.05284	Up
Q15847	ADIRF	0.012654	0.0218036	8.41956	Up
Q15904	ATP6AP1	0.000666001	0.00209949	0.0641618	Down
Q15942	ZYX	0.00597451	0.0118915	2.45978	Up
Q16134	ETFDH	0.0199606	0.0324348	0.498078	Down
Q16181	SEPTIN7	5.71424e-08	4.72853e-06	0.336837	Down
Q16204	CCDC6	0.00495939	0.00999731	0.678087	Down
Q16352	INA	0.000666001	0.00209949	0.00124608	Down
Q16363	LAMA4	0.000666001	0.00209949	17.3708	Up
Q16401	PSMD5	0.000666001	0.00209949	3.19997	Up
Q16531	DDB1	0.000666001	0.00209949	1.71006	Up
Q16543	CDC37	0.0276355	0.0437352	0.773192	Down
Q16555	DPYSL2	1.20469e-05	0.000258929	0.114983	Down
Q16576	RBBP7	2.79537e-06	8.66225e-05	3.80868	Up
Q16623	STX1A	0.000666001	0.00209949	0.00335248	Down
Q16629	SRSF7	0.00466201	0.0094323	2.35711	Up
Q16630	CPSF6	0.000666001	0.00209949	2.33373	Up
Q16643	DBN1	0.012654	0.0218036	0.388958	Down
Q16666	IFI16	0.000666001	0.00209949	13.694	Up
Q16718	NDUFA5	0.000240118	0.00209949	0.370498	Down
Q16774	GUK1	0.0125657	0.0218036	0.596193	Down
Q16775	HAGH	0.000169635	0.00200527	0.556864	Down
Q16795	NDUFA9	2.57577e-09	5.79063e-07	0.249162	Down
Q16798	ME3	0.000666001	0.00209949	0.0265908	Down
Q16799	RTN1	0.000666001	0.00209949	0.0116943	Down
Q16836	HADH	0.0265827	0.0423838	0.803521	Down
Q16864	ATP6V1F	0.000666001	0.00209949	0.133581	Down
Q16891	IMMT	1.69148e-07	1.16642e-05	0.459115	Down
Q1KMD3	HNRNPUL2	0.000666001	0.00209949	3.60186	Up
Q2M2I8	AAK1	0.000666001	0.00209949	0.275006	Down
Q2M389	WASHC4	5.67767e-05	0.000870051	1.85769	Up
Q2TAA2	IAH1	0.0018679	0.00477501	1.90809	Up
Q3KQU3	MAP7D1	0.00466201	0.0094323	0.296774	Down
Q3LXA3	TKFC	0.000666001	0.00209949	2.49004	Up
Q3SY69	ALDH1L2	0.00466201	0.0094323	20.4453	Up
Q3YEC7	RABL6	0.00924549	0.0167234	0.527026	Down
Q3ZCM7	TUBB8	0.00287538	0.00629465	0.366647	Down
Q3ZCQ8	TIMM50	0.00149906	0.0040906	0.466934	Down
Q3ZCW2	LGALSL	0.000666001	0.00209949	0.254803	Down
Q49A26	GLYR1	0.000666001	0.00209949	2.74682	Up
Q4G0F5	VPS26B	1.10816e-06	4.4732e-05	0.438756	Down
Q4G0N4	NADK2	0.000849364	0.00262993	0.503393	Down
Q4J6C6	PREPL	0.000666001	0.00209949	0.153105	Down
Q4KMP7	TBC1D10B	0.000666001	0.00209949	0.183855	Down
Q4KMQ2	ANO6	0.000666001	0.00209949	14.1411	Up
Q4V328	GRIPAP1	0.000114032	0.0014744	0.282508	Down
Q52LJ0	FAM98B	0.000941903	0.00288676	1.91074	Up
Q53GQ0	HSD17B12	0.00126083	0.00362898	1.55481	Up
Q53H12	AGK	0.000211037	0.00209949	0.334095	Down
Q53H82	LACTB2	0.000666001	0.00209949	2.51732	Up
Q5H9R7	PPP6R3	0.019314	0.0315594	2.19734	Up
Q5JPH6	EARS2	0.027972	0.0437352	0.685892	Down
Q5JRA6	MIA3	0.00799201	0.0146476	2.6653	Up
Q5JSH3	WDR44	0.00207389	0.00493855	0.288161	Down
Q5JTZ9	AARS2	0.002664	0.00589823	3.4842	Up
Q5JU85	IQSEC2	0.000666001	0.00209949	0.0969355	Down
Q5SSJ5	HP1BP3	0.000666001	0.00209949	2.61748	Up
Q5SW79	CEP170	0.000666001	0.00209949	0.380291	Down
Q5T1M5	FKBP15	2.32861e-05	0.000430598	2.98648	Up
Q5T4S7	UBR4	0.0196798	0.0320257	1.42138	Up
Q5VW32	BROX	0.002664	0.00589823	2.00645	Up
Q5VYK3	ECPAS	0.0088347	0.0160675	1.95421	Up
Q63ZY3	KANK2	0.000666001	0.00209949	43.594	Up
Q641Q2	WASHC2A	0.0169384	0.0283448	1.684	Up
Q68CZ2	TNS3	0.00799201	0.0146476	10.1476	Up
Q6DD88	ATL3	0.000666001	0.00209949	7.17363	Up
Q6DN90	IQSEC1	0.000666001	0.00209949	0.0991724	Down
Q6IAA8	LAMTOR1	0.012654	0.0218036	1.60132	Up
Q6NUK1	SLC25A24	0.000666001	0.00209949	3.69076	Up
Q6NZI2	CAVIN1	0.000666001	0.00209949	7.91369	Up
Q6P2E9	EDC4	0.000666001	0.00209949	2.12089	Up
Q6P2Q9	PRPF8	0.000666001	0.00209949	4.89397	Up
Q6PCB0	VWA1	0.019314	0.0315594	9.43399	Up
Q6PCB7	SLC27A1	0.00924587	0.0167234	1.7478	Up
Q6PCE3	PGM2L1	0.000666001	0.00209949	0.0109608	Down
Q6UW68	TMEM205	0.027972	0.0437352	2.6296	Up
Q6UWE0	LRSAM1	0.00466201	0.0094323	0.238728	Down
Q6UWR7	ENPP6	0.019314	0.0315594	14.8515	Up
Q6UXN9	WDR82	0.000437794	0.00209949	2.02971	Up
Q6VY07	PACS1	0.000666001	0.00209949	0.333793	Down
Q6WCQ1	MPRIP	0.001332	0.00366494	1.99484	Up
Q6XQN6	NAPRT	0.000777784	0.00242645	3.99432	Up
Q6YN16	HSDL2	0.000778557	0.00242657	0.553945	Down
Q6ZMP0	THSD4	0.000666001	0.00209949	59.1199	Up
Q6ZVM7	TOM1L2	0.000666001	0.00209949	0.152309	Down
Q709C8	VPS13C	0.000666001	0.00209949	2.7234	Up
Q71DI3	H3C13	0.000666001	0.00209949	3.32015	Up
Q71U36	TUBA1A	2.0674e-05	0.000402535	0.224703	Down
Q7KZF4	SND1	0.000666001	0.00209949	3.90454	Up
Q7KZI7	MARK2	0.000666001	0.00209949	0.200043	Down
Q7L014	DDX46	0.000544376	0.00209949	2.57691	Up
Q7L099	RUFY3	0.000666001	0.00209949	0.0239327	Down
Q7L1Q6	BZW1	0.000666001	0.00209949	4.42215	Up
Q7L2H7	EIF3M	3.39274e-08	3.50936e-06	3.29881	Up
Q7L576	CYFIP1	0.000666001	0.00209949	3.16743	Up
Q7L5N1	COPS6	0.0125326	0.0218036	0.766343	Down
Q7L775	EPM2AIP1	0.0046313	0.0094323	2.01972	Up
Q9H8S9	MOB1A	0.00799201	0.0146476	1.87319	Up
Q7Z2K6	ERMP1	0.001332	0.00366494	8.68914	Up
Q7Z2W4	ZC3HAV1	0.000666001	0.00209949	5.48051	Up
Q7Z406	MYH14	0.00300598	0.00655453	1.45535	Up
Q7Z460	CLASP1	0.002664	0.00589823	0.457061	Down
Q7Z4H3	HDDC2	0.019314	0.0315594	1.72932	Up
Q7Z4H8	POGLUT3	0.000666001	0.00209949	13.6552	Up
Q7Z4S6	KIF21A	0.000666001	0.00209949	0.0164435	Down
Q7Z4V5	HDGFL2	0.000526911	0.00209949	2.65639	Up
Q7Z6K5	ARPIN	0.00278913	0.0061479	2.83186	Up
Q7Z6Z7	HUWE1	0.00283785	0.00622897	1.83848	Up
Q7Z7K6	CENPV	0.00799201	0.0146476	4.54781	Up
Q86U42	PABPN1	1.96335e-06	6.91351e-05	3.09973	Up
Q86UE4	MTDH	0.000666001	0.00209949	2.62157	Up
Q86UP2	KTN1	9.58937e-07	4.17642e-05	3.36266	Up
Q86V81	ALYREF	0.000666001	0.00209949	3.30455	Up
Q86VN1	VPS36	3.90693e-05	0.000646597	2.54322	Up
Q86WA6	BPHL	0.00847131	0.0154661	0.598095	Down
Q86X83	COMMD2	0.0114671	0.0204065	1.70988	Up
Q86Y39	NDUFA11	6.63832e-07	3.2313e-05	0.241123	Down
Q86Y82	STX12	0.000666001	0.00209949	0.479783	Down
Q8IU85	CAMK1D	0.0271677	0.0432748	0.554387	Down
Q8IUD2	ERC1	0.00123287	0.00356091	1.90087	Up
Q8IVD9	NUDCD3	0.00466201	0.0094323	0.588502	Down
Q8IVH4	MMAA	0.00793158	0.0146476	0.635252	Down
Q8IW45	NAXD	0.000658997	0.00209949	0.435306	Down
Q8IXB1	DNAJC10	0.000666001	0.00209949	5.77038	Up
Q8IXI2	RHOT1	0.00131782	0.00366494	0.595227	Down
Q8IXJ6	SIRT2	0.000666001	0.00209949	0.0256617	Down
Q8IZ83	ALDH16A1	0.00466201	0.0094323	2.57111	Up
Q8IZP0	ABI1	2.48195e-05	0.000453882	0.340762	Down
Q8N0W3	FCSK	0.00466201	0.0094323	2.9313	Up
Q8N126	CADM3	0.000666001	0.00209949	0.0327626	Down
Q8N163	CCAR2	4.60192e-06	0.000125887	3.1869	Up
Q8N1B4	VPS52	0.00799201	0.0146476	0.51407	Down
Q8N1F7	NUP93	0.000666001	0.00209949	3.89432	Up
Q8N2K0	ABHD12	0.027972	0.0437352	0.538808	Down
Q8N3E9	PLCD3	0.0307927	0.0477842	1.76873	Up
Q8N3V7	SYNPO	0.00466201	0.0094323	0.186828	Down
Q8N4C8	MINK1	0.000666001	0.00209949	0.105781	Down
Q8N573	OXR1	0.000666001	0.00209949	0.0612559	Down
Q8N6H7	ARFGAP2	0.00466201	0.0094323	1.51375	Up
Q8N6T3	ARFGAP1	0.000666001	0.00209949	0.20419	Down
Q8N766	EMC1	0.00799201	0.0146476	1.46986	Up
Q8N8S7	ENAH	0.000666001	0.00209949	3.04099	Up
Q8N9N7	LRRC57	0.000183278	0.00209913	0.569679	Down
Q8NBF2	NHLRC2	0.000666001	0.00209949	11.172	Up
Q8NBJ7	SUMF2	0.0081063	0.0148406	2.00354	Up
Q8NBQ5	HSD17B11	0.000666001	0.00209949	3.33632	Up
Q8NBS9	TXNDC5	0.000666001	0.00209949	5.36255	Up
Q8NBU5	ATAD1	0.0181027	0.0302016	0.741845	Down
Q8NBX0	SCCPDH	0.001332	0.00366494	0.587564	Down
Q8NC51	SERBP1	0.000666001	0.00209949	2.60243	Up
Q8NC56	LEMD2	0.000666001	0.00209949	3.56515	Up
Q8NCN5	PDPR	0.00799201	0.0146476	4.73551	Up
Q8NE71	ABCF1	5.12558e-05	0.000795275	3.02988	Up
Q8NF91	SYNE1	0.00174541	0.00455624	0.433624	Down
Q8NHH9	ATL2	0.000666001	0.00209949	3.65227	Up
Q8TAF3	WDR48	0.000666001	0.00209949	0.202091	Down
Q8TAQ2	SMARCC2	0.000666001	0.00209949	4.40585	Up
Q8TB36	GDAP1	0.000666001	0.00209949	0.0679915	Down
Q8TBC4	UBA3	0.0155276	0.0261161	1.55623	Up
Q8TBF2	PRXL2B	0.000990694	0.00290826	0.439144	Down
Q8TBX8	PIP4K2C	0.019317	0.0315594	0.498968	Down
Q8TC12	RDH11	0.00230619	0.00546811	0.630038	Down
Q8TCJ2	STT3B	1.08416e-06	4.4732e-05	3.33363	Up
Q8TD19	NEK9	0.000666001	0.00209949	14.0038	Up
Q8TDJ6	DMXL2	0.000666001	0.00209949	0.0160581	Down
Q8TDQ7	GNPDA2	0.012654	0.0218036	2.06215	Up
Q8TDW0	LRRC8C	0.00466201	0.0094323	2.68832	Up
Q8WU76	SCFD2	0.00710419	0.0135221	1.53078	Up
Q8WUM4	PDCD6IP	2.27218e-05	0.000427326	1.67462	Up
Q8WUW1	BRK1	6.96008e-08	5.35764e-06	0.348453	Down
Q8WVM8	SCFD1	3.6811e-05	0.000621655	1.66085	Up
Q8WVV9	HNRNPLL	0.000217313	0.00209949	2.31507	Up
Q8WWI5	SLC44A1	0.00799201	0.0146476	0.36087	Down
Q8WXF7	ATL1	2.16948e-05	0.000415241	0.163212	Down
Q92499	DDX1	0.00141722	0.00388007	1.70861	Up
Q92522	H1-10	0.000666001	0.00209949	3.53651	Up
Q92538	GBF1	0.000666001	0.00209949	3.43135	Up
Q92597	NDRG1	0.00466201	0.0094323	6.1115	Up
Q92598	HSPH1	0.000666001	0.00209949	0.179234	Down
Q92599	SEPTIN8	1.72205e-10	8.14286e-08	0.229473	Down
Q92614	MYO18A	0.000193745	0.00209949	0.452446	Down
Q92616	GCN1	0.000666001	0.00209949	8.76736	Up
Q92621	NUP205	0.000666001	0.00209949	5.51937	Up
Q92734	TFG	0.00025142	0.00209949	1.93472	Up
Q92747	ARPC1A	0.000666001	0.00209949	0.284984	Down
Q92752	TNR	0.000666001	0.00209949	0.00207338	Down
Q92769	HDAC2	0.000666001	0.00209949	2.94981	Up
Q92796	DLG3	0.000666001	0.00209949	0.142712	Down
Q92804	TAF15	0.012654	0.0218036	2.05458	Up
Q92841	DDX17	0.000666001	0.00209949	3.0198	Up
Q92878	RAD50	0.000666001	0.00209949	13.6689	Up
Q92882	OSTF1	0.027972	0.0437352	1.82074	Up
Q92890	UFD1	0.0108193	0.0193473	1.88526	Up
Q92896	GLG1	0.000666001	0.00209949	5.52524	Up
Q92900	UPF1	0.000332799	0.00209949	2.04718	Up
Q92945	KHSRP	0.000666001	0.00209949	2.33979	Up
Q92973	TNPO1	0.000666001	0.00209949	2.51117	Up
Q92974	ARHGEF2	0.000666001	0.00209949	0.325919	Down
Q93050	ATP6V0A1	0.000666001	0.00209949	0.0403097	Down
Q93052	LPP	0.000666001	0.00209949	16.5919	Up
Q969H8	MYDGF	0.000666001	0.00209949	2.02488	Up
Q969V3	NCLN	1.4794e-05	0.000306051	2.36059	Up
Q969X5	ERGIC1	0.000666001	0.00209949	8.48276	Up
Q96A33	CCDC47	0.000666001	0.00209949	1.89631	Up
Q96AB3	ISOC2	0.000666001	0.00209949	2.1375	Up
Q96AC1	FERMT2	9.44824e-05	0.00127129	2.41911	Up
Q96AE4	FUBP1	0.000666001	0.00209949	2.45788	Up
Q96AG4	LRRC59	0.000666001	0.00209949	2.60946	Up
Q96AT9	RPE	5.75183e-05	0.00087531	2.76852	Up
Q96AX1	VPS33A	0.00845819	0.0154592	1.42973	Up
Q96BJ3	AIDA	0.0015298	0.00410187	1.73344	Up
Q96C19	EFHD2	0.000666001	0.00209949	0.291809	Down
Q96CM8	ACSF2	0.002664	0.00589823	7.29681	Up
Q96CS3	FAF2	0.000666001	0.00209949	2.68624	Up
Q96CW1	AP2M1	3.85605e-05	0.000641384	0.273807	Down
Q96CX2	KCTD12	0.000666001	0.00209949	2.60889	Up
Q96DB5	RMDN1	0.00466201	0.0094323	2.41035	Up
Q96DE0	NUDT16	0.0222378	0.0360113	1.75852	Up
Q96DG6	CMBL	0.000666001	0.00209949	4.92166	Up
Q96DH6	MSI2	0.000666001	0.00209949	4.16452	Up
Q96EE3	SEH1L	0.000666001	0.00209949	3.45322	Up
Q96EP5	DAZAP1	0.001332	0.00366494	2.61223	Up
Q96F07	CYFIP2	0.000666001	0.00209949	0.28957	Down
Q96F85	CNRIP1	0.000666001	0.00209949	0.151898	Down
Q96FJ2	DYNLL2	1.62211e-06	5.96577e-05	0.412529	Down
Q96FQ6	S100A16	0.012654	0.0218036	2.30057	Up
Q96G03	PGM2	0.000666001	0.00209949	3.31705	Up
Q96GA7	SDSL	0.002664	0.00589823	4.01491	Up
Q96GD0	PDXP	0.000666001	0.00209949	0.076067	Down
Q96HC4	PDLIM5	0.000666001	0.00209949	6.05143	Up
Q96HN2	AHCYL2	0.00799201	0.0146476	4.58813	Up
Q96HY6	DDRGK1	9.57039e-08	6.88652e-06	3.52066	Up
Q96I99	SUCLG2	0.000666001	0.00209949	4.6657	Up
Q96IJ6	GMPPA	0.027972	0.0437352	2.62859	Up
Q96IU4	ABHD14B	0.000666001	0.00209949	8.03194	Up
Q96IX5	ATP5MK	7.2201e-05	0.00103011	0.291732	Down
Q96JB5	CDK5RAP3	0.000666001	0.00209949	3.40779	Up
Q96JE9	MAP6	0.000666001	0.00209949	0.00198182	Down
Q96JJ3	ELMO2	0.012654	0.0218036	2.82527	Up
Q96JJ7	TMX3	0.0209821	0.0340445	0.679571	Down
Q96K17	BTF3L4	0.00799201	0.0146476	2.22003	Up
Q96K19	RNF170	0.00355126	0.00765777	1.89301	Up
Q96KR1	ZFR	0.000666001	0.00209949	2.49236	Up
Q96P48	ARAP1	0.000666001	0.00209949	12.9615	Up
Q96P70	IPO9	0.000184138	0.00209949	1.88749	Up
Q96PD5	PGLYRP2	0.019314	0.0315594	4.35276	Up
Q96PK6	RBM14	0.000666001	0.00209949	2.33281	Up
Q96PU8	QKI	0.0224001	0.0362564	1.5758	Up
Q96QK1	VPS35	0.0310523	0.0481645	0.817441	Down
Q96S19	METTL26	0.00044047	0.00209949	0.639132	Down
Q96S52	PIGS	2.37831e-05	0.000437344	1.814	Up
Q96SB3	PPP1R9B	0.012654	0.0218036	0.426025	Down
Q96T51	RUFY1	0.000666001	0.00209949	6.03011	Up
Q96TA1	NIBAN2	0.000666001	0.00209949	10.4419	Up
Q99439	CNN2	0.019314	0.0315594	5.75811	Up
Q99447	PCYT2	0.0162201	0.0271979	0.551339	Down
Q99460	PSMD1	0.000401167	0.00209949	1.64896	Up
Q99471	PFDN5	0.0126949	0.0218628	0.677686	Down
Q99523	SORT1	0.0107199	0.0191902	0.571506	Down
Q99536	VAT1	0.019314	0.0315594	3.5896	Up
Q99598	TSNAX	4.02692e-08	3.92032e-06	3.33633	Up
Q99613	EIF3C	0.0006948	0.00218196	2.11381	Up
Q99627	COPS8	0.0317699	0.0491853	0.674659	Down
Q99714	HSD17B10	0.00466201	0.0094323	2.30268	Up
Q99719	SEPTIN5	0.000666001	0.00209949	0.0423135	Down
Q99747	NAPG	6.7193e-05	0.000992915	0.140125	Down
Q99798	ACO2	3.09604e-08	3.30815e-06	0.211535	Down
Q99805	TM9SF2	0.000666001	0.00209949	2.76165	Up
Q99808	SLC29A1	0.000666001	0.00209949	15.0861	Up
Q99829	CPNE1	8.77145e-08	6.45189e-06	4.33174	Up
Q99873	PRMT1	2.92686e-06	8.83731e-05	1.98876	Up
Q99962	SH3GL2	0.000666001	0.00209949	0.00228149	Down
Q9BPW8	NIPSNAP1	1.61906e-05	0.000324792	0.203723	Down
Q9BPX5	ARPC5L	0.000720948	0.00226193	0.321661	Down
Q9BR76	CORO1B	0.000666001	0.00209949	2.66307	Up
Q9BRA2	TXNDC17	0.00483324	0.00976085	1.35713	Up
Q9BRG1	VPS25	0.000666001	0.00209949	3.03467	Up
Q9BRQ6	CHCHD6	5.97411e-06	0.000148354	0.32451	Down
Q9BRR6	ADPGK	0.000666001	0.00209949	3.6941	Up
Q9BRX8	PRXL2A	0.000119756	0.00151875	0.384457	Down
Q9BS26	ERP44	0.000666001	0.00209949	3.10288	Up
Q9BSJ8	ESYT1	0.000666001	0.00209949	2.38973	Up
Q9BT09	CNPY3	0.012654	0.0218036	2.7155	Up
Q9BTV4	TMEM43	0.000666001	0.00209949	11.1622	Up
Q9BUF5	TUBB6	0.001332	0.00366494	2.78021	Up
Q9BUJ2	HNRNPUL1	0.000666001	0.00209949	5.17809	Up
Q9BUR5	APOO	0.000666001	0.00209949	0.177359	Down
Q9BUT1	BDH2	0.000175892	0.00204282	3.05932	Up
Q9BV57	ADI1	0.00466201	0.0094323	7.46157	Up
Q9BVG4	PBDC1	0.027972	0.0437352	1.68979	Up
Q9BVK6	TMED9	0.000666001	0.00209949	4.04682	Up
Q9BW72	HIGD2A	0.00503591	0.0101269	0.498197	Down
Q9BWD1	ACAT2	0.00882683	0.016062	0.666825	Down
Q9BWF3	RBM4	0.000986101	0.00290826	2.74923	Up
Q9BWJ5	SF3B5	0.000666001	0.00209949	3.98486	Up
Q9BWM7	SFXN3	3.96162e-08	3.92032e-06	0.266279	Down
Q9BWS9	CHID1	6.01849e-06	0.000148354	5.46613	Up
Q9BXF6	RAB11FIP5	0.0136261	0.0233087	0.412018	Down
Q9BXP5	SRRT	0.000666001	0.00209949	3.2456	Up
Q9BXW6	OSBPL1A	0.001332	0.00366494	0.356309	Down
Q9BY11	PACSIN1	0.000666001	0.00209949	0.0015696	Down
Q9BY32	ITPA	0.00292334	0.00638697	1.9911	Up
Q9BYD3	MRPL4	0.001332	0.00366494	3.69881	Up
Q9BZF9	UACA	0.000666001	0.00209949	18.8272	Up
Q9BZH6	WDR11	0.000666001	0.00209949	3.77261	Up
Q9BZV1	UBXN6	0.018939	0.0314136	0.760317	Down
Q9BZZ5	API5	0.00312451	0.00678173	1.9266	Up
Q9C005	DPY30	0.00799201	0.0146476	3.12572	Up
Q9C040	TRIM2	0.000666001	0.00209949	0.0936148	Down
Q9C0C9	UBE2O	0.000666001	0.00209949	0.307986	Down
Q9GZP4	PITHD1	6.53679e-08	5.27726e-06	0.359062	Down
Q9GZS3	SKIC8	0.000495327	0.00209949	1.7557	Up
Q9H0A8	COMMD4	1.30423e-05	0.000276731	3.27795	Up
Q9H0E2	TOLLIP	0.000666001	0.00209949	0.352615	Down
Q9H0U4	RAB1B	0.00123757	0.00357136	0.65643	Down
Q9H0W9	C11orf54	0.000147807	0.00181874	3.12968	Up
Q9H115	NAPB	0.000666001	0.00209949	0.0452791	Down
Q9H1K1	ISCU	0.000666001	0.00209949	0.33444	Down
Q9H223	EHD4	0.001332	0.00366494	7.23911	Up
Q9H269	VPS16	0.00870284	0.0158538	1.30067	Up
Q9H2H8	PPIL3	0.00192661	0.00477501	1.56211	Up
Q9H2U2	PPA2	0.000666001	0.00209949	2.79856	Up
Q9H3P7	ACBD3	0.000666001	0.00209949	5.76051	Up
Q9H3Z4	DNAJC5	0.000666001	0.00209949	0.0803306	Down
Q9H479	FN3K	0.00466201	0.0094323	0.4758	Down
Q9H492	MAP1LC3A	0.00466201	0.0094323	0.202319	Down
Q9H4A4	RNPEP	0.000666001	0.00209949	5.36257	Up
Q9H4G0	EPB41L1	3.85533e-05	0.000641384	0.290599	Down
Q9H4G4	GLIPR2	0.000495363	0.00209949	0.534027	Down
Q9H4M9	EHD1	0.012654	0.0218036	5.34204	Up
Q9H6U6	BCAS3	0.00420505	0.00888807	0.322677	Down
Q9H6Z4	RANBP3	0.001332	0.00366494	3.01994	Up
Q9H7Z7	PTGES2	4.83486e-05	0.000759908	0.453491	Down
Q9H8H3	TMT1A	0.000666001	0.00209949	4.41825	Up
Q9H8Y8	GORASP2	0.012654	0.0218036	2.05552	Up
Q9H936	SLC25A22	0.000666001	0.00209949	0.044729	Down
Q9H9B4	SFXN1	0.000666001	0.00209949	0.204169	Down
Q9H9J2	MRPL44	0.012654	0.0218036	1.97606	Up
Q9H9Q2	COPS7B	0.00217225	0.00516533	1.66135	Up
Q9HAB8	PPCS	0.0041049	0.00868192	2.08515	Up
Q9HAV0	GNB4	0.027972	0.0437352	0.578797	Down
Q9HBH5	RDH14	0.019314	0.0315594	1.61216	Up
Q9HBL0	TNS1	0.000666001	0.00209949	6.27948	Up
Q9HCH3	CPNE5	0.000666001	0.00209949	0.0551828	Down
Q9HCM2	PLXNA4	0.000666001	0.00209949	0.0989457	Down
Q9HCN8	SDF2L1	0.000666001	0.00209949	2.91213	Up
Q9HCU5	PREB	0.027972	0.0437352	1.46354	Up
Q9NNW7	TXNRD2	0.0186217	0.0309553	0.454564	Down
Q9NP72	RAB18	0.000609588	0.00209949	0.437367	Down
Q9NP79	VTA1	0.00466201	0.0094323	0.608483	Down
Q9NP81	SARS2	9.79405e-05	0.00130194	0.261903	Down
Q9NPH2	ISYNA1	0.000666001	0.00209949	17.4963	Up
Q9NQ48	LZTFL1	7.21621e-05	0.00103011	0.413901	Down
Q9NQ66	PLCB1	0.000666001	0.00209949	0.0621155	Down
Q9NQC3	RTN4	0.00172209	0.00450247	0.505799	Down
Q9NQP4	PFDN4	0.000851539	0.0026342	0.518783	Down
Q9NQW7	XPNPEP1	0.000104453	0.00137198	2.39861	Up
Q9NR31	SAR1A	0.00286378	0.0062734	1.65284	Up
Q9NR45	NANS	2.24842e-05	0.000427326	2.29616	Up
Q9NR46	SH3GLB2	0.00017332	0.00202717	0.349693	Down
Q9NR56	MBNL1	0.000666001	0.00209949	3.62012	Up
Q9NRN5	OLFML3	0.00799201	0.0146476	34.77	Up
Q9NRY4	ARHGAP35	0.00846826	0.0154661	0.473607	Down
Q9NRY5	FAM114A2	0.00799201	0.0146476	2.00931	Up
Q9NS69	TOMM22	0.00394094	0.008454	0.514439	Down
Q9NS86	LANCL2	0.000666001	0.00209949	0.177001	Down
Q9NSD9	FARSB	0.027972	0.0437352	0.478115	Down
Q9NSK0	KLC4	0.00466201	0.0094323	2.0544	Up
Q9NTJ4	MAN2C1	0.001332	0.00366494	2.93287	Up
Q9NUB1	ACSS1	0.012654	0.0218036	0.23428	Down
Q9NUJ1	ABHD10	0.00327157	0.00708235	0.691472	Down
Q9NUQ8	ABCF3	8.02351e-06	0.000189699	3.02718	Up
Q9NUQ9	CYRIB	0.00799201	0.0146476	0.522535	Down
Q9NUU7	DDX19A	0.00226339	0.00537048	2.09245	Up
Q9NUV9	GIMAP4	0.000666001	0.00209949	6.78417	Up
Q9NV96	TMEM30A	0.000666001	0.00209949	0.113117	Down
Q9NVA2	SEPTIN11	5.63631e-06	0.000143897	0.38648	Down
Q9NVE7	PANK4	0.010368	0.0186005	0.623862	Down
Q9NVG8	TBC1D13	0.012654	0.0218036	2.04815	Up
Q9NVH1	DNAJC11	5.37648e-09	1.10465e-06	0.314375	Down
Q9NVI7	ATAD3A	2.71311e-06	8.63499e-05	0.486536	Down
Q9NVT9	ARMC1	0.00219174	0.00520795	0.625979	Down
Q9NW15	ANO10	0.000666001	0.00209949	3.32396	Up
Q9NWH9	SLTM	0.000666001	0.00209949	1.99966	Up
Q9NWV4	CZIB	3.99167e-05	0.000650858	2.36057	Up
Q9NX46	ADPRS	0.000127016	0.00159757	2.11553	Up
Q9NX62	BPNT2	0.000666001	0.00209949	3.3312	Up
Q9NX63	CHCHD3	2.39183e-06	7.84125e-05	0.421241	Down
Q9NXA8	SIRT5	0.000522017	0.00209949	0.286765	Down
Q9NXG2	THUMPD1	0.000666001	0.00209949	4.64179	Up
Q9NY33	DPP3	0.000666001	0.00209949	2.69397	Up
Q9NYB9	ABI2	0.000666001	0.00209949	0.163362	Down
Q9NYF8	BCLAF1	0.000666001	0.00209949	3.49509	Up
Q9NYL9	TMOD3	9.6141e-09	1.38359e-06	8.25572	Up
Q9NYU2	UGGT1	0.000666001	0.00209949	2.72979	Up
Q9NZ01	TECR	0.002664	0.00589823	1.88231	Up
Q9NZ08	ERAP1	0.000666001	0.00209949	5.98935	Up
Q9NZ32	ACTR10	0.00012742	0.00159757	0.591024	Down
Q9NZ45	CISD1	0.000666001	0.00209949	0.13641	Down
Q9NZB2	FAM120A	4.57673e-06	0.000125887	3.1315	Up
Q9NZJ7	MTCH1	0.000141998	0.00176697	0.28983	Down
Q9NZM1	MYOF	0.000666001	0.00209949	24.7471	Up
Q9NZN4	EHD2	0.000666001	0.00209949	8.60172	Up
Q9NZQ3	NCKIPSD	0.000666001	0.00209949	0.355089	Down
Q9NZR1	TMOD2	0.000666001	0.00209949	0.0633425	Down
Q9P000	COMMD9	2.4677e-06	8.00792e-05	2.33946	Up
Q9P016	THYN1	0.000666001	0.00209949	7.1867	Up
Q9P0J0	NDUFA13	0.000666001	0.00209949	0.348736	Down
Q9P0J1	PDP1	0.012654	0.0218036	1.99903	Up
Q9P0L0	VAPA	0.000666001	0.00209949	0.528975	Down
Q9P0M6	MACROH2A2	0.000666001	0.00209949	13.6728	Up
Q9P0S9	TMEM14C	0.027972	0.0437352	2.32421	Up
Q9P0V9	SEPTIN10	0.000666001	0.00209949	3.85	Up
Q9P260	RELCH	0.000666001	0.00209949	0.323442	Down
Q9P266	JCAD	0.00466201	0.0094323	19.4492	Up
Q9P2B2	PTGFRN	0.00466201	0.0094323	6.40115	Up
Q9P2E9	RRBP1	0.000666001	0.00209949	8.85995	Up
Q9P2J5	LARS1	0.000666001	0.00209949	1.71815	Up
Q9P2R3	ANKFY1	4.67966e-05	0.000744696	1.70712	Up
Q9P2R7	SUCLA2	0.000297462	0.00209949	0.221205	Down
Q9UBB6	NCDN	0.000666001	0.00209949	0.0673255	Down
Q9UBC2	EPS15L1	4.43078e-05	0.00071541	0.643749	Down
Q9UBF2	COPG2	0.000666001	0.00209949	4.31771	Up
Q9UBG0	MRC2	0.000666001	0.00209949	128.659	Up
Q9UBQ5	EIF3K	7.76842e-05	0.00107588	2.32111	Up
Q9UBQ7	GRHPR	0.0130981	0.0224635	1.38479	Up
Q9UBR2	CTSZ	0.001332	0.00366494	4.84958	Up
Q9UBS4	DNAJB11	0.000666001	0.00209949	2.23545	Up
Q9UBT2	UBA2	0.000666001	0.00209949	4.1742	Up
Q9UBV2	SEL1L	0.00466201	0.0094323	2.01764	Up
Q9UBX3	SLC25A10	0.00466201	0.0094323	0.358718	Down
Q9UDT6	CLIP2	0.000666001	0.00209949	0.08506	Down
Q9UDY2	TJP2	0.000666001	0.00209949	3.12289	Up
Q9UEY8	ADD3	0.012654	0.0218036	1.97906	Up
Q9UFN0	NIPSNAP3A	0.0128254	0.022053	0.597053	Down
Q9UGV2	NDRG3	0.00137885	0.0037844	0.310744	Down
Q9UH65	SWAP70	0.000666001	0.00209949	10.7107	Up
Q9UHA4	LAMTOR3	0.00132744	0.00366494	1.47986	Up
Q9UHB6	LIMA1	0.000666001	0.00209949	25.7882	Up
Q9UHB9	SRP68	0.00661302	0.0130215	1.92409	Up
Q9UHD1	CHORDC1	0.0105194	0.018862	0.533991	Down
Q9UHD8	SEPTIN9	0.002664	0.00589823	0.406101	Down
Q9UHG3	PCYOX1	0.012654	0.0218036	1.52653	Up
Q9UHL4	DPP7	0.027972	0.0437352	3.03198	Up
Q9UHQ4	BCAP29	0.00487861	0.00984046	0.65008	Down
Q9UHX1	PUF60	1.81659e-06	6.6076e-05	3.28555	Up
Q9UHY7	ENOPH1	0.001332	0.00366494	0.410061	Down
Q9UI09	NDUFA12	0.000666001	0.00209949	0.229106	Down
Q9UI12	ATP6V1H	0.000666001	0.00209949	0.110607	Down
Q9UIQ6	LNPEP	0.000651769	0.00209949	2.284	Up
Q9UIW2	PLXNA1	0.000666001	0.00209949	0.0364306	Down
Q9UJ68	MSRA	0.0310933	0.0482056	0.757303	Down
Q9UJ70	NAGK	0.000155407	0.00187414	2.2879	Up
Q9UKG1	APPL1	0.00993268	0.0178583	1.72359	Up
Q9UKK9	NUDT5	0.000667563	0.00210241	1.78123	Up
Q9UKM9	RALY	0.000666001	0.00209949	3.55195	Up
Q9UKU7	ACAD8	0.012654	0.0218036	0.60739	Down
Q9UL18	AGO1	0.002664	0.00589823	5.96865	Up
Q9UL25	RAB21	0.027972	0.0437352	0.729916	Down
Q9UL46	PSME2	0.000666001	0.00209949	4.35502	Up
Q9ULA0	DNPEP	0.000666001	0.00209949	3.23821	Up
Q9ULP9	TBC1D24	0.000666001	0.00209949	0.103531	Down
Q9ULU8	CADPS	0.000666001	0.00209949	0.0122679	Down
Q9UM54	MYO6	0.019314	0.0315594	2.24266	Up
Q9UMS4	PRPF19	2.80018e-06	8.66225e-05	2.39676	Up
Q9UMY4	SNX12	0.019314	0.0315594	1.40889	Up
Q9UN36	NDRG2	0.000666001	0.00209949	0.0951046	Down
Q9UNE7	STUB1	0.000666001	0.00209949	0.752325	Down
Q9UNF1	MAGED2	0.00466201	0.0094323	4.13284	Up
Q9UNH7	SNX6	0.000666001	0.00209949	2.65311	Up
Q9UNM6	PSMD13	4.87281e-05	0.000760802	1.83659	Up
Q9UPN3	MACF1	0.000666001	0.00209949	0.358755	Down
Q9UPR5	SLC8A2	0.000666001	0.00209949	0.0116166	Down
Q9UQ16	DNM3	0.000666001	0.00209949	0.248059	Down
Q9UQ35	SRRM2	0.000666001	0.00209949	5.5321	Up
Q9UQ80	PA2G4	0.00220646	0.00523915	1.39806	Up
Q9UQB3	CTNND2	0.000666001	0.00209949	0.0403098	Down
Q9UQB8	BAIAP2	0.000666001	0.00209949	0.0799127	Down
Q9UQE7	SMC3	0.000666001	0.00209949	13.5389	Up
Q9UQM7	CAMK2A	0.000666001	0.00209949	0.0122146	Down
Q9Y224	RTRAF	0.00799201	0.0146476	2.05204	Up
Q9Y230	RUVBL2	0.000666001	0.00209949	2.19326	Up
Q9Y243	AKT3	0.002664	0.00589823	0.325115	Down
Q9Y262	EIF3L	1.36864e-06	5.32964e-05	2.78743	Up
Q9Y263	PLAA	0.000440923	0.00209949	1.77072	Up
Q9Y265	RUVBL1	0.000666001	0.00209949	2.74182	Up
Q9Y266	NUDC	0.002664	0.00589823	0.570444	Down
Q9Y277	VDAC3	8.15584e-08	6.13541e-06	0.305057	Down
Q9Y281	CFL2	0.0150083	0.025294	0.703851	Down
Q9Y295	DRG1	0.000508095	0.00209949	2.70081	Up
Q9Y2A7	NCKAP1	7.75542e-05	0.00107588	0.300692	Down
Q9Y2B0	CNPY2	0.002664	0.00589823	1.69642	Up
Q9Y2H5	PLEKHA6	0.000666001	0.00209949	8.07689	Up
Q9Y2I8	WDR37	1.20167e-05	0.000258929	0.19442	Down
Q9Y2J2	EPB41L3	0.000666001	0.00209949	0.103275	Down
Q9Y2Q3	GSTK1	0.002664	0.00589823	2.58511	Up
Q9Y2W1	THRAP3	0.000666001	0.00209949	3.63662	Up
Q9Y2X3	NOP58	0.000666001	0.00209949	4.62163	Up
Q9Y2X7	GIT1	0.000666001	0.00209949	0.36583	Down
Q9Y333	LSM2	0.00112788	0.00326337	2.2546	Up
Q9Y371	SH3GLB1	0.00253751	0.005849	1.73085	Up
Q9Y376	CAB39	0.000762732	0.00238399	0.575184	Down
Q9Y383	LUC7L2	0.000666001	0.00209949	3.77853	Up
Q9Y394	DHRS7	0.00799201	0.0146476	1.80413	Up
Q9Y3A5	SBDS	0.00161521	0.00424988	1.94451	Up
Q9Y3B3	TMED7	1.7818e-08	2.26837e-06	3.65919	Up
Q9Y3C8	UFC1	0.000666001	0.00209949	2.2744	Up
Q9Y3I0	RTCB	0.000127207	0.00159757	1.82065	Up
Q9Y3U8	RPL36	0.000666001	0.00209949	3.96361	Up
Q9Y3Z3	SAMHD1	0.000666001	0.00209949	10.1787	Up
Q9Y496	KIF3A	0.000666001	0.00209949	0.187702	Down
Q9Y4F1	FARP1	0.0298204	0.0464497	0.545525	Down
Q9Y4I1	MYO5A	0.000666001	0.00209949	0.021241	Down
Q9Y4J8	DTNA	0.00163695	0.00429683	0.199943	Down
Q9Y4P3	TBL2	0.000666001	0.00209949	2.88236	Up
Q9Y4W6	AFG3L2	2.139e-05	0.00041404	0.409161	Down
Q9Y512	SAMM50	0.000666001	0.00209949	0.577726	Down
Q9Y570	PPME1	0.000366343	0.00209949	0.49393	Down
Q9Y5B9	SUPT16H	0.000666001	0.00209949	6.43661	Up
Q9Y5J7	TIMM9	9.99733e-05	0.00132365	0.276	Down
Q9Y5K5	UCHL5	0.0050011	0.0100691	0.605787	Down
Q9Y5K8	ATP6V1D	0.000666001	0.00209949	0.128161	Down
Q9Y5L4	TIMM13	0.00520267	0.0104306	0.498245	Down
Q9Y5M8	SRPRB	0.00466201	0.0094323	2.79366	Up
Q9Y5P6	GMPPB	0.000666001	0.00209949	2.6311	Up
Q9Y5U8	MPC1	0.00376974	0.00810249	0.391837	Down
Q9Y5X1	SNX9	3.3761e-06	9.88929e-05	2.9972	Up
Q9Y5X3	SNX5	0.000666001	0.00209949	2.95784	Up
Q9Y617	PSAT1	0.000666001	0.00209949	0.174942	Down
Q9Y639	NPTN	6.9262e-08	5.35764e-06	0.130865	Down
Q9Y678	COPG1	0.000666001	0.00209949	5.4516	Up
Q9Y696	CLIC4	0.002664	0.00589823	3.26362	Up
Q9Y697	NFS1	2.31527e-06	7.74097e-05	0.454196	Down
Q9Y6C2	EMILIN1	0.000666001	0.00209949	45.1018	Up
Q9Y6C9	MTCH2	0.000152193	0.00185889	0.510279	Down
Q9Y6D5	ARFGEF2	0.00686654	0.0133181	0.459254	Down
Q9Y6G9	DYNC1LI1	0.00933759	0.0168617	0.618235	Down
Q9Y6I3	EPN1	0.000666001	0.00209949	0.385684	Down
Q9Y6M9	NDUFB9	9.55269e-05	0.00128014	0.238189	Down
Q9Y6N5	SQOR	0.000666001	0.00209949	35.2851	Up
Q9Y6R0	NUMBL	0.00628069	0.0124337	0.416229	Down
Q9GZQ8	MAP1LC3B	0.000999001	0.00290826	0.251971	Down
O14576	DYNC1I1	0.000999001	0.00290826	0.112657	Down
O14618	CCS	0.00363	0.00781737	2.50015	Up
O14827	RASGRF2	0.000999001	0.00290826	0.168112	Down
O15239	NDUFA1	0.000999001	0.00290826	0.328049	Down
O43295	SRGAP3	0.000999001	0.00290826	0.0403861	Down
O43678	NDUFA2	0.000999001	0.00290826	0.276254	Down
O60220	TIMM8A	0.00348832	0.00753185	0.539816	Down
O60282	KIF5C	0.000999001	0.00290826	0.0230985	Down
O60888	CUTA	0.011988	0.0212194	2.20346	Up
O75110	ATP9A	0.00459462	0.0094323	0.399684	Down
O75145	PPFIA3	0.000999001	0.00290826	0.0643265	Down
O75146	HIP1R	0.001998	0.00477501	0.384619	Down
O75167	PHACTR2	0.018981	0.0314136	4.6221	Up
O75334	PPFIA2	0.000999001	0.00290826	0.0797699	Down
O75382	TRIM3	0.000999001	0.00290826	0.0671911	Down
O75508	CLDN11	0.000999001	0.00290826	0.0322619	Down
O95139	NDUFB6	0.000166266	0.00197964	0.381101	Down
O95248	SBF1	0.000999001	0.00290826	0.0443212	Down
O95721	SNAP29	0.00148019	0.00404577	0.498652	Down
O96011	PEX11B	0.018981	0.0314136	0.620313	Down
P03905	MT-ND4	0.000999001	0.00290826	0.310299	Down
P03915	MT-ND5	0.000211162	0.00209949	0.332942	Down
P11279	LAMP1	0.00699301	0.0133181	2.75868	Up
P14207	FOLR2	0.011988	0.0212194	4.74139	Up
P15056	BRAF	0.000999001	0.00290826	0.303367	Down
P15882	CHN1	0.0274664	0.0436667	0.471268	Down
P17677	GAP43	0.000999001	0.00290826	0.0298658	Down
P27338	MAOB	0.000999001	0.00290826	0.0359472	Down
P35244	RPA3	0.011988	0.0212194	2.89392	Up
P35609	ACTN2	0.000999001	0.00290826	0.00893342	Down
P37235	HPCAL1	0.000999001	0.00290826	0.182283	Down
P42356	PI4KA	0.000999001	0.00290826	0.18163	Down
P47736	RAP1GAP	0.000999001	0.00290826	0.0280021	Down
P48729	CSNK1A1	0.0113934	0.020319	1.67968	Up
P48730	CSNK1D	0.000999001	0.00290826	0.338	Down
P49207	RPL34	0.011988	0.0212194	2.49113	Up
P49802	RGS7	0.000999001	0.00290826	0.0393509	Down
P56385	ATP5ME	0.000999001	0.00290826	0.309033	Down
P59768	GNG2	0.000999001	0.00290826	0.0302989	Down
P60468	SEC61B	0.00699301	0.0133181	2.0312	Up
P60520	GABARAPL2	0.000999001	0.00290826	0.0642843	Down
P61018	RAB4B	0.000581473	0.00209949	0.443978	Down
P61266	STX1B	0.000999001	0.00290826	0.00119125	Down
P62070	RRAS2	0.0143562	0.0242816	2.05095	Up
P62877	RBX1	0.00978115	0.017605	0.57985	Down
Q01432	AMPD3	0.000999001	0.00290826	7.24969	Up
Q05193	DNM1	0.000999001	0.00290826	0.0156627	Down
Q08431	MFGE8	0.018981	0.0314136	21.7564	Up
Q08722	CD47	0.001998	0.00477501	0.197021	Down
Q08AD1	CAMSAP2	0.001998	0.00477501	0.355606	Down
Q13033	STRN3	0.0197714	0.0321589	0.642791	Down
Q13085	ACACA	0.0287971	0.0449615	0.420733	Down
Q13505	MTX1	0.0005209	0.00209949	0.555781	Down
Q13636	RAB31	0.0129163	0.0221978	0.618553	Down
Q14515	SPARCL1	0.000999001	0.00290826	0.189641	Down
Q14738	PPP2R5D	0.018981	0.0314136	0.608424	Down
Q16537	PPP2R5E	0.001998	0.00477501	0.216646	Down
Q5HYK3	COQ5	0.00601192	0.0119445	0.382322	Down
Q5SWX8	ODR4	0.00102997	0.00299052	2.38098	Up
Q6P587	FAHD1	0.011988	0.0212194	0.395312	Down
Q86UR5	RIMS1	0.001998	0.00477501	0.260356	Down
Q86UX2	ITIH5	0.003996	0.00848414	9.40119	Up
Q8IWT6	LRRC8A	0.000552606	0.00209949	0.448507	Down
Q8IYQ7	THNSL1	0.00333605	0.00720779	0.523764	Down
Q8N3J6	CADM2	0.000999001	0.00290826	0.00592678	Down
Q8N5M9	JAGN1	0.0316045	0.0489522	1.34889	Up
Q8NC96	NECAP1	0.000999001	0.00290826	0.0452274	Down
Q8NCB2	CAMKV	0.000999001	0.00290826	0.00612976	Down
Q8NFP9	NBEA	0.000999001	0.00290826	0.102619	Down
Q8NFZ8	CADM4	0.000999001	0.00290826	0.0991631	Down
Q8NI08	NCOA7	0.00130665	0.00366494	0.401467	Down
Q8TCS8	PNPT1	0.011988	0.0212194	2.19003	Up
Q8WU79	SMAP2	0.0040097	0.00850776	0.404839	Down
Q8WUD1	RAB2B	9.03067e-06	0.000208373	0.418876	Down
Q8WXD9	CASKIN1	0.000999001	0.00290826	0.0404367	Down
Q8WXG6	MADD	0.000999001	0.00290826	0.042048	Down
Q92572	AP3S1	0.0080705	0.0147833	0.635795	Down
Q92777	SYN2	0.000999001	0.00290826	0.0013291	Down
Q92823	NRCAM	0.000999001	0.00290826	0.00244164	Down
Q969P0	IGSF8	0.000999001	0.00290826	0.00579303	Down
Q96EY1	DNAJA3	0.011988	0.0212194	0.405893	Down
Q96P47	AGAP3	0.000999001	0.00290826	0.144199	Down
Q96PU5	NEDD4L	0.003996	0.00848414	0.325956	Down
Q96PV0	SYNGAP1	0.000999001	0.00290826	0.0131545	Down
Q96S97	MYADM	0.000999001	0.00290826	0.242613	Down
Q99685	MGLL	0.000999001	0.00290826	0.0468528	Down
Q9BQE5	APOL2	0.001998	0.00477501	0.388198	Down
Q9BQI5	SGIP1	0.000999001	0.00290826	0.0170472	Down
Q9GZY8	MFF	0.00163086	0.00428425	0.309643	Down
Q9H1P3	OSBPL2	0.001998	0.00477501	0.299818	Down
Q9H254	SPTBN4	0.000999001	0.00290826	0.117762	Down
Q9H3K6	BOLA2	0.00699301	0.0133181	1.60563	Up
Q9H3Q1	CDC42EP4	0.018981	0.0314136	0.341857	Down
Q9H9A6	LRRC40	0.0114204	0.0203453	0.544381	Down
Q9NPJ3	ACOT13	0.00135022	0.00371199	0.276395	Down
Q9NQE9	HINT3	0.001998	0.00477501	0.306727	Down
Q9NQX3	GPHN	0.000999001	0.00290826	0.0839198	Down
Q9NRW1	RAB6B	0.000999001	0.00290826	0.0491375	Down
Q9UI15	TAGLN3	0.000999001	0.00290826	0.00313435	Down
Q9ULH1	ASAP1	0.011988	0.0212194	0.329285	Down
Q9UMX5	NENF	0.000740767	0.00231972	2.66379	Up
Q9UPA5	BSN	0.000999001	0.00290826	0.00478452	Down
Q9UPY8	MAPRE3	0.000999001	0.00290826	0.0363577	Down
Q9UQ03	CORO2B	5.14166e-05	0.000795275	0.369674	Down
Q9Y2T2	AP3M1	0.000999001	0.00290826	3.02412	Up
Q9Y3E0	GOLT1B	0.028971	0.0452117	5.48371	Up
Q9Y4C0	NRXN3	0.000999001	0.00290826	0.119891	Down
Q9Y4E6	WDR7	0.000999001	0.00290826	0.0338649	Down
Q9Y5Z4	HEBP2	0.0275833	0.0437352	2.42127	Up
O14495	PLPP3	0.0278376	0.0437352	0.60154	Down
O14531	DPYSL4	0.001554	0.00410187	0.0213947	Down
O14807	MRAS	0.00404091	0.00855204	0.387721	Down
O60268	KIAA0513	0.001554	0.00410187	0.0528812	Down
O76070	SNCG	0.001554	0.00410187	0.00516685	Down
O95741	CPNE6	0.001554	0.00410187	0.02437	Down
P01116	KRAS	0.001554	0.00410187	0.233114	Down
P03886	MT-ND1	0.00621601	0.0123204	0.321152	Down
P05186	ALPL	0.018648	0.0309553	78.7274	Up
P10636	MAPT	0.001554	0.00410187	0.00220093	Down
P12036	NEFH	0.001554	0.00410187	0.00366762	Down
P16870	CPE	0.001554	0.00410187	0.0949504	Down
P27449	ATP6V0C	0.001554	0.00410187	0.0644363	Down
P32004	L1CAM	0.001554	0.00410187	0.0075119	Down
P41217	CD200	0.001554	0.00410187	0.0402431	Down
P43003	SLC1A3	0.001554	0.00410187	0.0144737	Down
P51808	DYNLT3	0.00150268	0.00409709	0.470868	Down
P53365	ARFIP2	1.61458e-09	4.8584e-07	0.222474	Down
P54764	EPHA4	0.001554	0.00410187	0.0340002	Down
P61601	NCALD	0.001554	0.00410187	0.0723093	Down
P62745	RHOB	0.001554	0.00410187	0.0589916	Down
Q13825	AUH	0.00621601	0.0123204	0.245446	Down
Q14168	MPP2	0.003108	0.00675032	0.180993	Down
Q14642	INPP5A	0.001554	0.00410187	0.259254	Down
Q14894	CRYM	0.001554	0.00410187	0.0136036	Down
Q15119	PDK2	0.000919348	0.00282548	0.433738	Down
Q3SXM5	HSDL1	0.001554	0.00410187	0.163696	Down
Q5TF21	SOGA3	0.001554	0.00410187	0.223679	Down
Q6H8Q1	ABLIM2	0.001554	0.00410187	0.147801	Down
Q6IQ22	RAB12	0.00621601	0.0123204	0.38877	Down
Q6PIU2	NCEH1	0.001554	0.00410187	0.0697205	Down
Q86UL8	MAGI2	0.003108	0.00675032	0.192373	Down
Q86YM7	HOMER1	0.001554	0.00410187	0.0341093	Down
Q8N608	DPP10	0.001554	0.00410187	0.0811879	Down
Q8TB96	ITFG1	0.001554	0.00410187	0.298547	Down
Q92736	RYR2	0.001554	0.00410187	0.0516353	Down
Q969M3	YIPF5	0.00641489	0.0126766	1.61954	Up
Q96EQ0	SGTB	0.001554	0.00410187	0.0595212	Down
Q96G97	BSCL2	0.0026109	0.00589823	0.60413	Down
Q96RL7	VPS13A	0.00376746	0.00810249	0.348415	Down
Q9BSF4	TIMM29	0.0130163	0.0223464	0.435612	Down
Q9BW30	TPPP3	0.001554	0.00410187	0.12712	Down
Q9H061	TMEM126A	0.018648	0.0309553	0.480385	Down
Q9H1Z4	WDR13	0.001554	0.00410187	0.265441	Down
Q9H2X9	SLC12A5	0.001554	0.00410187	0.0143886	Down
Q9HB21	PLEKHA1	0.003108	0.00675032	0.225331	Down
Q9NYI0	PSD3	0.001554	0.00410187	0.0102952	Down
Q9NZ52	GGA3	0.00509955	0.0102362	0.506838	Down
Q9NZD2	GLTP	0.029526	0.0460128	0.336462	Down
Q9P0K1	ADAM22	0.001554	0.00410187	0.02804	Down
Q9UDW1	UQCR10	0.001554	0.00410187	0.337267	Down
Q9UK22	FBXO2	0.003108	0.00675032	0.102066	Down
Q9ULD0	OGDHL	0.001554	0.00410187	0.064793	Down
Q9Y241	HIGD1A	0.00438684	0.00924281	0.403426	Down
Q9Y2J8	PADI2	0.001554	0.00410187	0.0200839	Down
Q9Y2Q0	ATP8A1	0.001554	0.00410187	0.033242	Down
Q9Y2T3	GDA	0.001554	0.00410187	0.00329155	Down
Q9Y2V2	CARHSP1	0.00422033	0.00890899	1.81025	Up
Q9Y4P8	WIPI2	0.001554	0.00410187	0.272255	Down
Q9Y6V0	PCLO	0.001554	0.00410187	0.0195243	Down
O14490	DLGAP1	0.00252525	0.00582886	0.127585	Down
O15083	ERC2	0.000357872	0.00209949	0.174168	Down
O15240	VGF	0.00252525	0.00582886	0.0183349	Down
O15394	NCAM2	0.00252525	0.00582886	0.00496729	Down
O43505	B4GAT1	0.00252525	0.00582886	0.409636	Down
O75381	PEX14	0.00670127	0.0131717	0.52738	Down
O75914	PAK3	0.00252525	0.00582886	0.143833	Down
O94811	TPPP	0.00252525	0.00582886	0.00353903	Down
P00395	MT-CO1	0.0257947	0.0412146	0.452654	Down
P00414	MT-CO3	0.010101	0.0181314	0.362866	Down
P07711	CTSL	0.0117276	0.0208477	2.56759	Up
P11169	SLC2A3	0.00252525	0.00582886	0.0648619	Down
P13726	F3	0.00252525	0.00582886	0.109411	Down
P14649	MYL6B	0.00288613	0.00630984	0.509758	Down
P20336	RAB3A	0.00252525	0.00582886	0.00400433	Down
P20338	RAB4A	0.030303	0.0470906	0.381445	Down
P23471	PTPRZ1	0.00252525	0.00582886	0.0231502	Down
P32418	SLC8A1	0.00252525	0.00582886	0.108123	Down
P35052	GPC1	0.00505051	0.0101439	0.369342	Down
P51674	GPM6A	0.00252525	0.00582886	0.00693544	Down
P53677	AP3M2	0.00252525	0.00582886	0.0654868	Down
P55290	CDH13	0.00252525	0.00582886	0.0852225	Down
P62166	NCS1	0.00252525	0.00582886	0.0608876	Down
P68366	TUBA4A	0.00252525	0.00582886	0.0272619	Down
Q13424	SNTA1	0.00252525	0.00582886	0.0585448	Down
Q14289	PTK2B	0.00252525	0.00582886	0.0941339	Down
Q14376	GALE	0.0176768	0.0295059	0.652622	Down
Q52LD8	RFTN2	0.000820896	0.00254894	0.458649	Down
Q5T0D9	TPRG1L	0.00252525	0.00582886	0.0741276	Down
Q68D91	MBLAC2	0.00453245	0.0094323	0.31254	Down
Q6KCM7	SLC25A25	0.00252525	0.00582886	0.0459212	Down
Q6PI78	TMEM65	0.00252525	0.00582886	0.0994591	Down
Q7L1S5	CHST9	0.00252525	0.00582886	0.0784857	Down
Q86UY8	NT5DC3	0.00252525	0.00582886	0.114317	Down
Q8N3F0	MTURN	0.00252525	0.00582886	0.174935	Down
Q8N4Q1	CHCHD4	0.0196231	0.0319805	0.446957	Down
Q8N568	DCLK2	0.00252525	0.00582886	0.155692	Down
Q8N5S9	CAMKK1	0.00252525	0.00582886	0.254533	Down
Q92574	TSC1	0.00252525	0.00582886	0.27159	Down
Q96HS1	PGAM5	0.00505051	0.0101439	0.229026	Down
Q96NT1	NAP1L5	0.030303	0.0470906	0.377396	Down
Q99570	PIK3R4	0.00182766	0.00475593	0.543284	Down
Q9BSU1	PHAF1	0.00252525	0.00582886	0.153039	Down
Q9BYT8	NLN	0.000940952	0.00288652	0.406496	Down
Q9BYV8	CEP41	0.030303	0.0470906	0.315519	Down
Q9GZN7	ROGDI	0.00252525	0.00582886	0.109699	Down
Q9H0Q0	CYRIA	0.00252525	0.00582886	0.0737592	Down
Q9H0R8	GABARAPL1	0.00252525	0.00582886	0.290632	Down
Q9NQC7	CYLD	0.030303	0.0470906	0.28252	Down
Q9UII2	ATP5IF1	0.0176768	0.0295059	0.382175	Down
Q9UPV7	PHF24	0.00252525	0.00582886	0.0210217	Down
Q9Y2G0	EFR3B	0.00252525	0.00582886	0.245359	Down
O00273	DFFA	0.0150956	0.0254153	1.48409	Up
O14653	GOSR2	0.000592899	0.00209949	2.08518	Up
O14776	TCERG1	0.001998	0.00477501	2.78335	Up
O14879	IFIT3	0.001998	0.00477501	6.13857	Up
O14907	TAX1BP3	3.03133e-05	0.00052809	3.85459	Up
O15027	SEC16A	6.71942e-05	0.000992915	3.15821	Up
O15042	U2SURP	0.001998	0.00477501	2.89203	Up
O15127	SCAMP2	0.001998	0.00477501	4.66554	Up
O15355	PPM1G	0.001998	0.00477501	2.91926	Up
O15382	BCAT2	0.001998	0.00477501	7.72182	Up
O43149	ZZEF1	0.00742003	0.014107	1.94631	Up
O43252	PAPSS1	0.001998	0.00477501	5.85781	Up
O43294	TGFB1I1	0.001998	0.00477501	14.8504	Up
O43324	EEF1E1	0.001998	0.00477501	2.26578	Up
O43447	PPIH	0.013986	0.0236994	2.00249	Up
O43493	TGOLN2	0.013986	0.0236994	2.64902	Up
O43660	PLRG1	0.001998	0.00477501	4.08759	Up
O43670	ZNF207	0.001998	0.00477501	4.78708	Up
O75400	PRPF40A	0.001998	0.00477501	5.85827	Up
O94906	PRPF6	0.001998	0.00477501	4.78091	Up
O95163	ELP1	0.00799201	0.0146476	1.74987	Up
O95232	LUC7L3	0.001998	0.00477501	4.85019	Up
O95394	PGM3	0.013986	0.0236994	2.43895	Up
O95486	SEC24A	0.001998	0.00477501	6.98072	Up
O95777	LSM8	0.001998	0.00477501	3.25293	Up
O95980	RECK	0.023976	0.0385059	5.4666	Up
P04062	GBA1	0.023976	0.0385059	3.57109	Up
P08294	SOD3	0.023976	0.0385059	4.01446	Up
P08575	PTPRC	0.00386686	0.00830046	3.90171	Up
P08579	SNRPB2	0.001998	0.00477501	6.2461	Up
P09619	PDGFRB	0.001998	0.00477501	67.6309	Up
P09668	CTSH	0.000352716	0.00209949	3.92021	Up
P09914	IFIT1	0.001998	0.00477501	6.73557	Up
P13674	P4HA1	0.001998	0.00477501	10.7267	Up
P15927	RPA2	0.0227682	0.0368162	2.43666	Up
P17480	UBTF	0.001998	0.00477501	9.97435	Up
P18031	PTPN1	0.001998	0.00477501	3.41999	Up
P18077	RPL35A	0.001998	0.00477501	3.08302	Up
P18084	ITGB5	0.001998	0.00477501	7.28948	Up
P18754	RCC1	0.001998	0.00477501	4.60876	Up
P20591	MX1	0.023976	0.0385059	11.1412	Up
P23193	TCEA1	0.001998	0.00477501	4.65984	Up
P23919	DTYMK	0.0122857	0.021723	2.00854	Up
P35659	DEK	0.001998	0.00477501	4.51067	Up
P40306	PSMB10	0.001998	0.00477501	4.35856	Up
P42766	RPL35	0.00038523	0.00209949	2.77752	Up
P45973	CBX5	0.001998	0.00477501	4.33175	Up
P46776	RPL27A	0.000773785	0.00241625	3.42092	Up
P49023	PXN	0.001998	0.00477501	21.8535	Up
P49321	NASP	0.001998	0.00477501	7.30381	Up
P49585	PCYT1A	0.000182489	0.00209736	3.46114	Up
P49756	RBM25	4.58177e-05	0.00073264	5.39955	Up
P49792	RANBP2	0.001998	0.00477501	4.81783	Up
P50479	PDLIM4	0.003996	0.00848414	9.19106	Up
P51580	TPMT	0.023976	0.0385059	4.53163	Up
P53634	CTSC	0.001998	0.00477501	8.37661	Up
P55008	AIF1	0.001998	0.00477501	7.65032	Up
P55039	DRG2	0.000491498	0.00209949	2.90601	Up
P55145	MANF	0.003996	0.00848414	3.24182	Up
P55287	CDH11	0.00799201	0.0146476	9.01943	Up
P57740	NUP107	0.00799201	0.0146476	3.22293	Up
P61011	SRP54	0.000155706	0.00187414	1.73866	Up
P61916	NPC2	0.000110501	0.00144569	2.79855	Up
P61964	WDR5	0.001998	0.00477501	2.77052	Up
P62308	SNRPG	0.003996	0.00848414	4.76571	Up
P62341	SELENOT	0.023976	0.0385059	2.63944	Up
P62861	FAU	0.02274	0.0367886	2.27857	Up
P63279	UBE2I	0.001998	0.00477501	4.39414	Up
P67809	YBX1	0.001998	0.00477501	3.13943	Up
P83436	COG7	0.003996	0.00848414	4.01698	Up
P83876	TXNL4A	0.000867191	0.00268011	2.85678	Up
Q02543	RPL18A	1.9061e-07	1.26184e-05	3.42546	Up
Q02880	TOP2B	0.001998	0.00477501	3.35006	Up
Q03519	TAP2	0.001998	0.00477501	4.06632	Up
Q06187	BTK	0.003996	0.00848414	3.50946	Up
Q06210	GFPT1	0.00799201	0.0146476	3.93107	Up
Q06278	AOX1	0.001998	0.00477501	7.38924	Up
Q08J23	NSUN2	0.001998	0.00477501	4.99809	Up
Q09028	RBBP4	0.001998	0.00477501	4.18993	Up
Q12888	TP53BP1	0.001998	0.00477501	2.87742	Up
Q13043	STK4	0.001998	0.00477501	4.56022	Up
Q13242	SRSF9	0.001998	0.00477501	2.79108	Up
Q13464	ROCK1	0.000154503	0.00187327	3.10366	Up
Q13595	TRA2A	0.001998	0.00477501	2.54652	Up
Q14258	TRIM25	0.001998	0.00477501	4.31456	Up
Q14314	FGL2	0.001998	0.00477501	45.1024	Up
Q14571	ITPR2	0.00799201	0.0146476	6.73582	Up
Q14789	GOLGB1	0.001998	0.00477501	13.5086	Up
Q14938	NFIX	0.001998	0.00477501	13.6172	Up
Q15113	PCOLCE	0.001998	0.00477501	21.1994	Up
Q15124	PGM5	0.013986	0.0236994	4.52757	Up
Q15311	RALBP1	0.0196374	0.0319872	0.630473	Down
Q15427	SF3B4	0.00170969	0.00447359	3.56616	Up
Q15428	SF3A2	0.001998	0.00477501	9.92152	Up
Q15477	SKIC2	7.8056e-05	0.00107652	3.10439	Up
Q15651	HMGN3	0.003996	0.00848414	6.67759	Up
Q15717	ELAVL1	0.001998	0.00477501	3.85296	Up
Q16527	CSRP2	0.00799201	0.0146476	3.50148	Up
Q16777	H2AC20	0.00955681	0.0172387	2.66614	Up
Q2TAY7	SMU1	0.001998	0.00477501	4.3087	Up
Q32P44	EML3	0.003996	0.00848414	5.0705	Up
Q562E7	WDR81	0.001998	0.00477501	2.79651	Up
Q5BKZ1	ZNF326	0.00145267	0.00397383	2.71314	Up
Q5JTV8	TOR1AIP1	0.001998	0.00477501	13.9901	Up
Q5QJ74	TBCEL	0.00666783	0.0131138	2.08005	Up
Q5SRE7	PHYHD1	0.0186042	0.0309447	1.65584	Up
Q5T6V5	QNG1	0.001998	0.00477501	2.57768	Up
Q63HN8	RNF213	0.001998	0.00477501	5.4295	Up
Q6NUM9	RETSAT	0.000116526	0.00150078	3.49883	Up
Q6PGP7	SKIC3	0.003996	0.00848414	3.11646	Up
Q6UX71	PLXDC2	0.001998	0.00477501	4.03737	Up
Q6UXI9	NPNT	0.00799201	0.0146476	45.8328	Up
Q6Y7W6	GIGYF2	0.0047581	0.00962083	1.80251	Up
Q7Z3B4	NUP54	0.001998	0.00477501	2.12913	Up
Q7Z3J2	VPS35L	0.023976	0.0385059	2.33389	Up
Q7Z739	YTHDF3	0.000782642	0.00243701	2.027	Up
Q7Z7H5	TMED4	0.001998	0.00477501	4.5037	Up
Q86UU1	PHLDB1	0.00799201	0.0146476	5.11073	Up
Q86VB7	CD163	0.001998	0.00477501	15.8975	Up
Q86W92	PPFIBP1	0.001998	0.00477501	48.6287	Up
Q86WR0	CCDC25	0.0131904	0.0226102	1.95411	Up
Q86XP3	DDX42	0.001998	0.00477501	5.13921	Up
Q8IWX8	CHERP	0.001998	0.00477501	6.11425	Up
Q8IYB3	SRRM1	0.00799201	0.0146476	2.60847	Up
Q8N118	CYP4X1	0.013986	0.0236994	10.3691	Up
Q8N684	CPSF7	0.001998	0.00477501	2.48393	Up
Q8N8A2	ANKRD44	0.013986	0.0236994	3.4688	Up
Q8NDH3	NPEPL1	4.56556e-05	0.00073264	3.92584	Up
Q8NFQ8	TOR1AIP2	0.001998	0.00477501	4.05155	Up
Q8TD55	PLEKHO2	0.0122145	0.0216088	2.13572	Up
Q8TE77	SSH3	0.000191138	0.00209949	3.3377	Up
Q8WUH6	TMEM263	0.001998	0.00477501	2.76171	Up
Q8WUM0	NUP133	0.001998	0.00477501	9.50787	Up
Q8WWY3	PRPF31	0.001998	0.00477501	3.52431	Up
Q8WX93	PALLD	0.003996	0.00848414	6.76921	Up
Q92575	UBXN4	0.0138084	0.0235961	2.15104	Up
Q92609	TBC1D5	7.55717e-06	0.000181263	3.83464	Up
Q92688	ANP32B	0.003996	0.00848414	3.51756	Up
Q969N2	PIGT	0.00859227	0.0156697	2.17359	Up
Q96C23	GALM	0.001998	0.00477501	9.00942	Up
Q96C86	DCPS	0.001998	0.00477501	4.64515	Up
Q96DI7	SNRNP40	0.001998	0.00477501	3.50144	Up
Q96FV2	SCRN2	7.11462e-07	3.3642e-05	3.25301	Up
Q96GX9	APIP	0.001998	0.00477501	4.10323	Up
Q96H20	SNF8	4.06478e-06	0.000114021	2.51486	Up
Q96I24	FUBP3	0.001998	0.00477501	7.5469	Up
Q96Q11	TRNT1	0.001998	0.00477501	2.31993	Up
Q99538	LGMN	0.000725246	0.00227326	2.27232	Up
Q99729	HNRNPAB	0.001998	0.00477501	3.76404	Up
Q99959	PKP2	0.023976	0.0385059	23.7509	Up
Q9BRJ7	NUDT16L1	0.023976	0.0385059	1.61796	Up
Q9BRP8	PYM1	0.00286058	0.00627055	2.6498	Up
Q9BSJ2	TUBGCP2	0.000118135	0.00150976	4.99925	Up
Q9BU02	THTPA	0.001998	0.00477501	2.33619	Up
Q9BUQ8	DDX23	0.00799201	0.0146476	2.68767	Up
Q9BY44	EIF2A	0.00359123	0.00773891	1.92301	Up
Q9BZK7	TBL1XR1	0.00192706	0.00477501	2.81135	Up
Q9BZL4	PPP1R12C	0.00110238	0.00319518	2.05015	Up
Q9H307	PNN	0.001998	0.00477501	4.00957	Up
Q9H488	POFUT1	0.001998	0.00477501	7.44935	Up
Q9H9E3	COG4	0.001998	0.00477501	5.16762	Up
Q9HB07	MYG1	0.001998	0.00477501	4.38255	Up
Q9HC35	EML4	0.001998	0.00477501	15.7021	Up
Q9HD20	ATP13A1	0.003996	0.00848414	2.48429	Up
Q9HD45	TM9SF3	0.001998	0.00477501	3.83073	Up
Q9NP58	ABCB6	0.013986	0.0236994	2.16559	Up
Q9NQG5	RPRD1B	0.001998	0.00477501	19.1415	Up
Q9NRF8	CTPS2	1.41066e-05	0.000293666	3.51097	Up
Q9NTZ6	RBM12	0.001998	0.00477501	5.07045	Up
Q9NUQ7	UFSP2	0.00799201	0.0146476	2.70059	Up
Q9NVD7	PARVA	0.001998	0.00477501	6.71728	Up
Q9NVZ3	NECAP2	0.001998	0.00477501	3.49914	Up
Q9NZL4	HSPBP1	0.0100708	0.0180869	1.65883	Up
Q9NZT2	OGFR	0.0045848	0.0094323	1.74325	Up
Q9P258	RCC2	0.001998	0.00477501	7.55414	Up
Q9UBE0	SAE1	0.001998	0.00477501	2.78014	Up
Q9UBM7	DHCR7	0.00799201	0.0146476	3.85153	Up
Q9UBN7	HDAC6	0.001998	0.00477501	3.45777	Up
Q9UBX5	FBLN5	0.001998	0.00477501	12.4647	Up
Q9UDR5	AASS	0.00799201	0.0146476	7.35982	Up
[truncated: 141 more rows]
