# Supplementary material for: Development of a Metabolic Subtype Classifier for Low- Grade Glioma to Guide Precision Therapy
Source: Research Square preprint supplement (doi:10.21203/rs.3.rs-7778086/v1), 2025-12-16
Supplement: Supplementary file 10 [file clinical.xlsx]

## Sheet: Sheet1
A0_Samples	A17_Age	A18_Sex	A1_OS	A2_Event	A7_Grade	A22_histological_type
TCGA-DU-A7TI	32	MALE	1183	Dead	G3	Astrocytoma
TCGA-S9-A7J2	25	MALE	62	Alive	G3	Oligodendroglioma
TCGA-P5-A730	22	MALE	333	Alive	G3	Oligoastrocytoma
TCGA-HT-7474	52	MALE	114	Alive	G2	Oligoastrocytoma
TCGA-TM-A84C	32	MALE	492	Dead	G2	Astrocytoma
TCGA-TQ-A7RG	36	MALE	599	Alive	G2	Oligoastrocytoma
TCGA-HT-A74O	34	MALE	3	Alive	G3	Astrocytoma
TCGA-S9-A7J3	52	FEMALE	629	Alive	G3	Oligodendroglioma
TCGA-CS-6666	22	MALE	1428	Alive	G3	Astrocytoma
TCGA-FG-7637	49	MALE	1219	Alive	G2	Oligoastrocytoma
TCGA-FG-A6IZ	60	MALE	457	Alive	G2	Oligodendroglioma
TCGA-S9-A6UB	52	MALE	3761	Alive	G2	Oligodendroglioma
TCGA-TQ-A7RP	66	MALE	914	Alive	G2	Oligoastrocytoma
TCGA-DU-7015	41	FEMALE	2761	Alive	G2	Oligodendroglioma
TCGA-HT-7857	24	FEMALE	7	Alive	G3	Astrocytoma
TCGA-CS-4943	37	MALE	1106	Dead	G3	Astrocytoma
TCGA-P5-A77W	37	FEMALE	584	Alive	G3	Oligoastrocytoma
TCGA-HT-7884	44	FEMALE	343	Alive	G2	Astrocytoma
TCGA-DU-7007	33	MALE	1915	Dead	G2	Astrocytoma
TCGA-FG-A6J1	44	FEMALE	500	Alive	G2	Oligodendroglioma
TCGA-E1-5304	42	MALE	1251	Dead	G3	Astrocytoma
TCGA-E1-5322	38	FEMALE	3978	Dead	G2	Oligoastrocytoma
TCGA-HT-8558	29	FEMALE	418	Alive	G2	Oligodendroglioma
TCGA-CS-5394	40	MALE	8	Alive	G3	Astrocytoma
TCGA-QH-A6X9	73	FEMALE	58	Alive	G2	Oligodendroglioma
TCGA-TM-A84F	48	MALE	1796	Alive	G3	Astrocytoma
TCGA-S9-A6TZ	39	FEMALE	1120	Alive	G2	Astrocytoma
TCGA-DU-7294	53	FEMALE	2869	Alive	G2	Oligodendroglioma
TCGA-TQ-A7RN	32	MALE	1026	Alive	G2	Oligodendroglioma
TCGA-TM-A7C3	43	FEMALE	1666	Dead	G3	Astrocytoma
TCGA-DB-A75M	47	MALE	544	Alive	G2	Astrocytoma
TCGA-DU-A5TS	42	MALE	964	Alive	G2	Oligodendroglioma
TCGA-DB-A4XD	32	MALE	1210	Alive	G3	Astrocytoma
TCGA-DH-5142	29	MALE	1943	Alive	G3	Astrocytoma
TCGA-WY-A85D	60	MALE	1147	Alive	G2	Oligoastrocytoma
TCGA-P5-A5F0	33	MALE	287	Alive	G2	Oligodendroglioma
TCGA-HT-7476	26	MALE	199	Alive	G2	Astrocytoma
TCGA-TM-A84G	54	FEMALE	1236	Alive	G3	Oligodendroglioma
TCGA-VM-A8CF	44	FEMALE	609	Alive	G3	Astrocytoma
TCGA-DB-A64W	65	FEMALE	438	Dead	G3	Oligoastrocytoma
TCGA-HT-7482	18	FEMALE	3253	Alive	G2	Oligoastrocytoma
TCGA-QH-A65R	38	FEMALE	461	Alive	G3	Oligodendroglioma
TCGA-QH-A6CZ	38	MALE	279	Alive	G2	Oligoastrocytoma
TCGA-S9-A6U0	46	MALE	742	Dead	G3	Astrocytoma
TCGA-QH-A6CV	51	MALE	442	Alive	G3	Oligoastrocytoma
TCGA-S9-A6TS	48	FEMALE	1891	Dead	G3	Astrocytoma
TCGA-HT-8106	53	MALE	3	Alive	G3	Astrocytoma
TCGA-DU-A76L	54	MALE	814	Dead	G3	Oligodendroglioma
TCGA-HT-7611	36	MALE	1752	Alive	G2	Oligoastrocytoma
TCGA-FG-A60J	47	FEMALE	449	Alive	G2	Oligoastrocytoma
TCGA-FG-A60L	34	FEMALE	655	Alive	G2	Astrocytoma
TCGA-DU-A6S2	37	FEMALE	777	Alive	G2	Oligodendroglioma
TCGA-DB-A4XH	53	FEMALE	962	Alive	G2	Oligoastrocytoma
TCGA-S9-A6WI	56	FEMALE	2585	Alive	G2	Oligoastrocytoma
TCGA-FG-A6J3	52	FEMALE	677	Alive	G3	Astrocytoma
TCGA-FG-8189	33	FEMALE	685	Alive	G2	Oligodendroglioma
TCGA-DB-A4XB	38	MALE	919	Alive	G3	Astrocytoma
TCGA-DU-8166	29	FEMALE	516	Alive	G2	Oligoastrocytoma
TCGA-FG-A60K	34	FEMALE	542	Alive	G2	Oligoastrocytoma
TCGA-FG-8185	37	MALE	433	Alive	G3	Astrocytoma
TCGA-S9-A7QY	35	FEMALE	863	Alive	G2	Oligoastrocytoma
TCGA-DB-A64L	67	FEMALE	736	Alive	G2	Oligodendroglioma
TCGA-DU-8164	51	MALE	651	Alive	G2	Oligodendroglioma
TCGA-VM-A8CA	54	MALE	411	Alive	G2	Oligodendroglioma
TCGA-HT-7609	34	MALE	1399	Alive	G3	Oligoastrocytoma
TCGA-DU-8158	57	FEMALE	155	Dead	G3	Astrocytoma
TCGA-HT-7881	38	MALE	1079	Alive	G2	Oligodendroglioma
TCGA-VW-A8FI	66	MALE	245	Dead	G3	Astrocytoma
TCGA-VM-A8C8	50	FEMALE	1397	Alive	G2	Oligodendroglioma
TCGA-RY-A847	45	MALE	933	Alive	G2	Oligodendroglioma
TCGA-QH-A86X	33	MALE	337	Alive	G2	Oligodendroglioma
TCGA-TM-A84M	40	MALE	754	Alive	G3	Oligodendroglioma
TCGA-DU-7010	58	FEMALE	456	Dead	G3	Astrocytoma
TCGA-DU-5849	48	MALE	443	Alive	G2	Oligodendroglioma
TCGA-VM-A8CB	33	MALE	3	Alive	G3	Oligodendroglioma
TCGA-DU-5853	29	MALE	407	Alive	G2	Oligoastrocytoma
TCGA-DU-A5TY	46	FEMALE	1033	Dead	G3	Astrocytoma
TCGA-TM-A84O	61	FEMALE	1011	Dead	G3	Oligodendroglioma
TCGA-RY-A83Z	54	FEMALE	301	Alive	G3	Astrocytoma
TCGA-HT-8564	47	MALE	478	Alive	G3	Astrocytoma
TCGA-FG-8186	42	FEMALE	487	Alive	G3	Oligoastrocytoma
TCGA-DU-8168	55	FEMALE	431	Alive	G3	Oligodendroglioma
TCGA-DB-5278	17	MALE	2772	Alive	G2	Oligodendroglioma
TCGA-S9-A6U6	28	MALE	1069	Alive	G3	Astrocytoma
TCGA-DU-7018	57	FEMALE	933	Dead	G3	Oligodendroglioma
TCGA-IK-7675	43	MALE	578	Dead	G2	Oligodendroglioma
TCGA-HT-7680	32	FEMALE	23	Alive	G2	Astrocytoma
TCGA-P5-A5EX	41	FEMALE	243	Alive	G3	Oligodendroglioma
TCGA-TM-A84S	36	MALE	454	Alive	G3	Oligodendroglioma
TCGA-DB-5281	61	MALE	2381	Alive	G3	Oligoastrocytoma
TCGA-HT-7875	56	MALE	10	Alive	G2	Oligodendroglioma
TCGA-S9-A6TW	40	MALE	1250	Alive	G3	Oligodendroglioma
TCGA-E1-A7YY	27	FEMALE	4445	Dead	G2	Oligodendroglioma
TCGA-FG-8188	41	MALE	455	Alive	G2	Oligoastrocytoma
TCGA-TM-A84T	19	MALE	724	Alive	G2	Oligoastrocytoma
TCGA-DB-A75P	25	FEMALE	492	Alive	G2	Astrocytoma
TCGA-DU-7013	59	MALE	269	Dead	G3	Astrocytoma
TCGA-HT-7477	62	MALE	738	Alive	G3	Astrocytoma
TCGA-P5-A735	38	FEMALE	292	Alive	G2	Astrocytoma
TCGA-RY-A843	30	MALE	63	Alive	G3	Astrocytoma
TCGA-DB-5280	43	MALE	1112	Alive	G2	Oligoastrocytoma
TCGA-E1-A7YS	71	MALE	466	Dead	G3	Oligodendroglioma
TCGA-EZ-7264	47	FEMALE	1201	Alive	G2	Oligodendroglioma
TCGA-E1-A7YJ	55	MALE	592	Dead	G3	Astrocytoma
TCGA-DB-A4XG	34	MALE	2219	Alive	G3	Oligodendroglioma
TCGA-S9-A6U5	33	MALE	992	Alive	G2	Astrocytoma
TCGA-DU-6396	31	FEMALE	2286	Dead	G3	Oligoastrocytoma
TCGA-DB-A64V	54	MALE	889	Alive	G2	Oligodendroglioma
TCGA-P5-A72W	35	MALE	317	Alive	G3	Astrocytoma
TCGA-FG-6688	59	FEMALE	571	Alive	G3	Astrocytoma
TCGA-HT-A74K	58	FEMALE	467	Alive	G3	Oligodendroglioma
TCGA-RY-A840	47	MALE	854	Alive	G3	Oligodendroglioma
TCGA-S9-A6U8	24	MALE	2988	Dead	G2	Astrocytoma
TCGA-HT-A5RB	24	MALE	3	Alive	G2	Astrocytoma
TCGA-FG-A4MT	27	FEMALE	1164	Alive	G2	Oligodendroglioma
TCGA-P5-A5ET	27	MALE	0	Alive	G2	Oligodendroglioma
TCGA-DU-A5TW	33	FEMALE	760	Alive	G3	Astrocytoma
TCGA-S9-A6WL	52	MALE	946	Alive	G3	Astrocytoma
TCGA-DU-5854	57	FEMALE	257	Alive	G3	Astrocytoma
TCGA-DU-6542	25	MALE	73	Alive	G3	Oligoastrocytoma
TCGA-DB-A4XF	41	FEMALE	1021	Alive	G3	Astrocytoma
TCGA-DU-7292	69	MALE	242	Dead	G3	Astrocytoma
TCGA-FG-6692	63	MALE	561	Dead	G3	Oligodendroglioma
TCGA-E1-5305	34	MALE	2433	Dead	G3	Astrocytoma
TCGA-VM-A8CD	58	MALE	240	Dead	G3	Astrocytoma
TCGA-CS-5397	54	FEMALE	194	Dead	G3	Astrocytoma
TCGA-DU-6397	45	MALE	1401	Dead	G3	Oligodendroglioma
TCGA-E1-5303	38	MALE	2052	Dead	G3	Astrocytoma
TCGA-HT-7610	25	FEMALE	1706	Alive	G2	Oligoastrocytoma
TCGA-S9-A6U1	22	FEMALE	785	Alive	G3	Astrocytoma
TCGA-HT-7483	14	MALE	5255	Alive	G2	Oligoastrocytoma
TCGA-S9-A6TY	50	MALE	1076	Alive	G2	Oligodendroglioma
TCGA-DU-6399	54	MALE	2000	Dead	G2	Oligodendroglioma
TCGA-E1-A7YW	28	MALE	1120	Dead	G2	Oligoastrocytoma
TCGA-HT-7608	61	MALE	671	Alive	G2	Oligoastrocytoma
TCGA-S9-A7R1	35	MALE	5166	Dead	G2	Oligodendroglioma
TCGA-WY-A85A	20	MALE	1320	Alive	G2	Astrocytoma
TCGA-TQ-A7RH	39	MALE	486	Alive	G2	Oligoastrocytoma
TCGA-DH-5140	38	FEMALE	607	Dead	G3	Oligoastrocytoma
TCGA-DU-6403	60	FEMALE	354	Dead	G3	Oligoastrocytoma
TCGA-FG-A4MW	63	MALE	559	Dead	G3	Oligoastrocytoma
TCGA-CS-4944	50	MALE	1828	Alive	G2	Astrocytoma
TCGA-HW-A5KL	42	FEMALE	878	Alive	G2	Astrocytoma
TCGA-FN-7833	25	MALE	837	Alive	G3	Oligoastrocytoma
TCGA-HT-7479	44	MALE	1227	Alive	G3	Astrocytoma
TCGA-P5-A72X	21	MALE	403	Alive	G3	Astrocytoma
TCGA-HT-A74L	22	FEMALE	336	Alive	G2	Oligoastrocytoma
TCGA-DU-8161	63	FEMALE	722	Dead	G3	Oligoastrocytoma
TCGA-QH-A6XA	23	FEMALE	502	Alive	G2	Oligoastrocytoma
TCGA-HT-7468	30	MALE	203	Alive	G3	Oligodendroglioma
TCGA-CS-4941	67	MALE	234	Dead	G3	Astrocytoma
TCGA-E1-5318	42	FEMALE	2379	Dead	G2	Oligodendroglioma
TCGA-S9-A7IQ	45	FEMALE	1099	Alive	G2	Oligoastrocytoma
TCGA-S9-A89V	70	MALE	569	Alive	G3	Astrocytoma
TCGA-DU-6400	66	FEMALE	37	Dead	G2	Oligodendroglioma
TCGA-E1-A7YE	32	FEMALE	886	Dead	G3	Astrocytoma
TCGA-FG-A710	50	FEMALE	1115	Alive	G2	Oligodendroglioma
TCGA-HT-8563	30	FEMALE	860	Alive	G3	Astrocytoma
TCGA-DH-A66F	49	MALE	523	Alive	G2	Oligodendroglioma
TCGA-TQ-A7RU	51	MALE	1032	Alive	G2	Oligodendroglioma
TCGA-HT-7616	75	MALE	7	Dead	G3	Oligodendroglioma
TCGA-FG-8187	31	MALE	611	Alive	G2	Oligoastrocytoma
TCGA-HT-8113	49	FEMALE	900	Alive	G2	Oligodendroglioma
TCGA-TM-A84Q	31	MALE	772	Alive	G2	Astrocytoma
TCGA-DU-7304	43	MALE	709	Dead	G3	Oligoastrocytoma
TCGA-HT-A74J	33	MALE	320	Alive	G2	Oligoastrocytoma
TCGA-DU-7306	67	MALE	1277	Alive	G2	Oligoastrocytoma
TCGA-HT-7677	53	MALE	494	Alive	G3	Oligodendroglioma
TCGA-HT-7470	37	MALE	1220	Dead	G3	Oligodendroglioma
TCGA-DB-5275	36	MALE	1458	Alive	G3	Oligoastrocytoma
TCGA-E1-A7YK	52	MALE	378	Dead	G3	Astrocytoma
TCGA-HT-7880	30	MALE	162	Alive	G2	Oligoastrocytoma
TCGA-FG-7643	49	FEMALE	611	Alive	G2	Oligoastrocytoma
TCGA-FG-7638	31	FEMALE	686	Alive	G3	Oligodendroglioma
TCGA-HT-7620	40	MALE	434	Alive	G3	Oligodendroglioma
TCGA-HT-A61A	20	FEMALE	194	Alive	G2	Oligodendroglioma
TCGA-DU-6393	66	MALE	1585	Dead	G3	Oligodendroglioma
TCGA-HT-8109	64	MALE	169	Alive	G3	Oligodendroglioma
TCGA-P5-A781	34	FEMALE	134	Alive	G3	Astrocytoma
TCGA-HT-7603	29	MALE	705	Alive	G2	Oligodendroglioma
TCGA-HT-A617	47	MALE	491	Alive	G2	Oligodendroglioma
TCGA-IK-8125	62	MALE	1301	Alive	G3	Oligoastrocytoma
TCGA-DB-A4X9	33	FEMALE	1412	Alive	G2	Oligoastrocytoma
TCGA-CS-6665	51	FEMALE	1568	Alive	G3	Astrocytoma
TCGA-HT-A616	36	FEMALE	55	Alive	G2	Astrocytoma
TCGA-DU-A7TD	52	MALE	228	Dead	G3	Oligoastrocytoma
TCGA-FG-5962	54	MALE	1453	Alive	G3	Oligodendroglioma
TCGA-DU-A7TC	32	MALE	1137	Alive	G2	Astrocytoma
TCGA-HT-A618	37	FEMALE	512	Alive	G3	Astrocytoma
TCGA-HW-7486	37	MALE	1721	Alive	G2	Oligodendroglioma
TCGA-HT-7686	29	FEMALE	1300	Alive	G3	Astrocytoma
TCGA-CS-5390	47	FEMALE			G2	Oligodendroglioma
TCGA-HW-A5KM	35	MALE	630	Alive	G2	Astrocytoma
TCGA-QH-A65S	32	FEMALE	77	Alive	G2	Oligoastrocytoma
TCGA-E1-A7YV	26	FEMALE	987	Dead	G3	Oligoastrocytoma
TCGA-HT-7475	67	MALE	530	Alive	G3	Oligoastrocytoma
TCGA-HT-7467	54	MALE	3	Alive	G2	Oligodendroglioma
TCGA-TM-A84I	30	MALE	854	Alive	G3	Astrocytoma
TCGA-FG-8182	35	MALE	416	Alive	G2	Oligodendroglioma
TCGA-TM-A7C5	30	MALE	1500	Alive	G2	Oligoastrocytoma
TCGA-S9-A6WQ	57	FEMALE	428	Alive	G2	Oligoastrocytoma
TCGA-DU-5872	43	FEMALE	532	Alive	G2	Oligoastrocytoma
TCGA-E1-5311	31	MALE	4084	Dead	G3	Oligodendroglioma
TCGA-DU-A76O	30	MALE	522	Alive	G2	Astrocytoma
TCGA-HT-8107	62	MALE	14	Alive	G2	Oligodendroglioma
TCGA-FG-8181	23	MALE	862	Alive	G3	Oligoastrocytoma
TCGA-VM-A8CH	24	FEMALE	714	Alive	G2	Astrocytoma
TCGA-FG-7636	48	MALE	544	Alive	G3	Astrocytoma
TCGA-QH-A6X3	27	MALE	313	Alive	G2	Oligoastrocytoma
TCGA-CS-5395	43	MALE	639	Dead	G2	Oligodendroglioma
TCGA-DB-5276	32	MALE	2218	Alive	G3	Oligoastrocytoma
TCGA-E1-A7YU	42	MALE	23	Dead	G3	Oligoastrocytoma
TCGA-DU-5871	37	FEMALE	576	Alive	G2	Oligoastrocytoma
TCGA-E1-A7Z6	41	FEMALE	984	Dead	G2	Astrocytoma
TCGA-DU-6401	31	FEMALE	2660	Dead	G2	Oligodendroglioma
TCGA-DH-5144	56	FEMALE	748	Alive	G3	Oligodendroglioma
TCGA-WY-A858	32	FEMALE	1337	Alive	G3	Astrocytoma
TCGA-DB-A64U	38	FEMALE	846	Alive	G2	Oligoastrocytoma
TCGA-FG-8191	30	MALE	992	Alive	G3	Oligodendroglioma
TCGA-TQ-A7RK	29	MALE	1341	Alive	G2	Oligoastrocytoma
TCGA-HT-7472	38	MALE	1	Alive	G2	Oligodendroglioma
TCGA-DB-5277	34	MALE	1547	Dead	G3	Astrocytoma
TCGA-VV-A829	44	MALE	1127	Alive	G3	Oligoastrocytoma
TCGA-DH-A7UV	49	MALE	566	Alive	G3	Astrocytoma
TCGA-HW-8319	34	FEMALE	1209	Dead	G3	Astrocytoma
TCGA-WY-A85C	36	MALE	1426	Alive	G2	Astrocytoma
TCGA-P5-A5EW	20	FEMALE	204	Alive	G2	Astrocytoma
TCGA-DB-A75O	29	MALE	935	Alive	G3	Astrocytoma
TCGA-DU-A7TA	32	MALE	2565	Alive	G2	Oligodendroglioma
TCGA-E1-A7Z4	35	MALE	4412	Dead	G2	Astrocytoma
TCGA-S9-A6TV	50	MALE	571	Alive	G3	Oligoastrocytoma
TCGA-HW-7495	45	FEMALE	1078	Alive	G2	Oligodendroglioma
TCGA-HT-7481	39	MALE	2918	Alive	G2	Oligodendroglioma
TCGA-E1-A7YQ	58	FEMALE	1578	Dead	G3	Oligodendroglioma
TCGA-DB-A64P	40	MALE	916	Alive	G3	Oligodendroglioma
TCGA-HT-7684	58	MALE	184	Alive	G3	Oligoastrocytoma
TCGA-TQ-A7RR	38	MALE	787	Alive	G2	Oligoastrocytoma
TCGA-HT-7691	31	FEMALE	3	Alive	G2	Astrocytoma
TCGA-HT-A5R7	33	FEMALE	615	Alive	G3	Astrocytoma
TCGA-HT-8104	51	FEMALE	372	Alive	G3	Astrocytoma
TCGA-DB-A64O	59	MALE	775	Dead	G2	Oligoastrocytoma
TCGA-S9-A7IY	39	MALE	715	Alive	G3	Oligoastrocytoma
TCGA-HT-A615	38	FEMALE	515	Alive	G2	Oligodendroglioma
TCGA-TM-A7C4	39	FEMALE	1470	Alive	G2	Astrocytoma
TCGA-DU-A7TG	40	MALE	1351	Dead	G2	Oligodendroglioma
TCGA-E1-5307	62	FEMALE	1762	Dead	G3	Astrocytoma
TCGA-P5-A731	59	FEMALE	274	Alive	G2	Oligoastrocytoma
TCGA-HT-7693	51	FEMALE	533	Alive	G2	Oligodendroglioma
TCGA-HW-7491	35	MALE	2078	Alive	G2	Oligodendroglioma
TCGA-F6-A8O4	44	MALE	6	Alive	G2	Astrocytoma
TCGA-E1-A7Z2	58	FEMALE	398	Dead	G2	Oligodendroglioma
TCGA-DB-A64R	24	FEMALE	955	Alive	G2	Oligodendroglioma
TCGA-S9-A6U2	48	FEMALE	908	Alive	G2	Oligodendroglioma
TCGA-FG-A4MY	44	FEMALE	721	Alive	G2	Oligoastrocytoma
TCGA-DB-A64Q	31	FEMALE	182	Alive	G2	Oligoastrocytoma
TCGA-HW-A5KJ	68	MALE	962	Dead	G3	Oligodendroglioma
TCGA-S9-A89Z	40	MALE	623	Alive	G3	Astrocytoma
TCGA-DU-A5TR	51	MALE	908	Alive	G2	Oligoastrocytoma
TCGA-DU-7298	38	FEMALE	576	Dead	G3	Astrocytoma
TCGA-HT-8018	40	FEMALE	1152	Dead	G2	Oligoastrocytoma
TCGA-S9-A6WD	58	MALE	2289	Alive	G3	Oligodendroglioma
TCGA-HW-7490	41	MALE	1387	Alive	G2	Astrocytoma
TCGA-TM-A84R	46	MALE	566	Alive	G2	Oligodendroglioma
TCGA-HT-7694	60	MALE	210	Alive	G3	Oligodendroglioma
TCGA-HT-7856	35	MALE	1189	Alive	G3	Oligodendroglioma
TCGA-HT-A74H	62	MALE	74	Alive	G3	Astrocytoma
TCGA-S9-A7R7	27	MALE	3000	Alive	G2	Astrocytoma
TCGA-DU-7302	48	FEMALE	1834	Alive	G3	Oligodendroglioma
TCGA-HT-8013	37	FEMALE	1933	Dead	G2	Oligoastrocytoma
TCGA-E1-A7YD	57	MALE	435	Dead	G3	Astrocytoma
TCGA-TM-A7CF	41	FEMALE	1989	Alive	G2	Astrocytoma
TCGA-TM-A7CA	44	MALE	1058	Alive	G2	Astrocytoma
TCGA-DU-7301	53	MALE	788	Dead	G2	Oligodendroglioma
TCGA-RY-A845	40	FEMALE	596	Alive	G2	Oligoastrocytoma
TCGA-DB-A75L	36	FEMALE	342	Alive	G3	Astrocytoma
TCGA-DU-A5TP	33	MALE	1012	Alive	G3	Astrocytoma
TCGA-TM-A84L	31	MALE	1242	Dead	G2	Oligoastrocytoma
TCGA-DH-5143	30	MALE	1401	Alive	G3	Oligoastrocytoma
TCGA-DU-7006	60	FEMALE	349	Dead	G3	Astrocytoma
TCGA-DU-A5TT	70	MALE	743	Alive	G3	Oligodendroglioma
TCGA-TQ-A7RV	27	MALE	1868	Alive	G2	Astrocytoma
TCGA-HT-7855	39	MALE	585	Alive	G3	Astrocytoma
TCGA-HW-7489	38	MALE	1262	Dead	G2	Oligoastrocytoma
TCGA-HT-7860	60	FEMALE	15	Alive	G3	Astrocytoma
TCGA-P5-A780	44	FEMALE	72	Alive	G3	Astrocytoma
TCGA-FG-5964	62	MALE	1588	Alive	G2	Oligodendroglioma
TCGA-HT-7601	30	FEMALE	153	Alive	G3	Astrocytoma
TCGA-HT-7473	28	MALE	503	Alive	G2	Oligoastrocytoma
TCGA-CS-5393	39	MALE	1222	Alive	G3	Astrocytoma
TCGA-QH-A6XC	48	MALE	508	Alive	G3	Astrocytoma
TCGA-VV-A86M	36	FEMALE	487	Alive	G3	Astrocytoma
TCGA-S9-A7IS	33	FEMALE	241	Dead	G3	Astrocytoma
TCGA-HT-7695	29	FEMALE	442	Alive	G2	Oligodendroglioma
TCGA-HT-8110	57	MALE	419	Alive	G3	Astrocytoma
TCGA-E1-5319	48	FEMALE	2907	Dead	G2	Oligodendroglioma
TCGA-HT-7854	62	MALE	1201	Alive	G2	Astrocytoma
TCGA-VM-A8C9	37	FEMALE	1314	Alive	G2	Astrocytoma
TCGA-HT-7692	43	MALE	90	Alive	G2	Oligoastrocytoma
TCGA-P5-A5EU	35	MALE	0	Alive	G3	Astrocytoma
TCGA-DU-8167	69	FEMALE	471	Alive	G2	Oligoastrocytoma
TCGA-S9-A6WM	59	FEMALE	604	Alive	G3	Astrocytoma
TCGA-DU-7014	59	MALE	3571	Dead	G2	Oligodendroglioma
TCGA-R8-A6ML	52	MALE	2860	Alive	G3	Oligodendroglioma
TCGA-DH-A7UR	59	FEMALE	1650	Alive	G3	Oligodendroglioma
TCGA-P5-A5F6	26	MALE	39	Alive	G2	Oligodendroglioma
TCGA-HT-A4DV	51	FEMALE	792	Alive	G3	Oligodendroglioma
TCGA-P5-A5F4	35	FEMALE	231	Alive	G3	Oligodendroglioma
TCGA-FG-7634	28	MALE	467	Alive	G2	Oligodendroglioma
TCGA-KT-A7W1	45	FEMALE	438	Alive	G3	Astrocytoma
TCGA-DU-6406	59	FEMALE	512	Dead	G3	Oligoastrocytoma
TCGA-FG-5965	39	FEMALE	1120	Dead	G2	Oligoastrocytoma
TCGA-HT-7690	29	MALE	3	Alive	G3	Oligoastrocytoma
TCGA-TQ-A7RM	41	FEMALE	1116	Alive	G3	Oligoastrocytoma
TCGA-DU-A76R	51	MALE	648	Dead	G3	Oligodendroglioma
TCGA-S9-A6WE	34	MALE	4113	Alive	G2	Oligodendroglioma
TCGA-QH-A6CS	41	MALE	588	Alive	G3	Astrocytoma
TCGA-P5-A5EY	21	MALE	72	Alive	G2	Astrocytoma
TCGA-DB-5279	59	MALE	1354	Alive	G2	Oligodendroglioma
TCGA-DB-5274	37	FEMALE	2289	Alive	G3	Oligoastrocytoma
TCGA-DU-A5TU	62	FEMALE	796	Alive	G2	Astrocytoma
TCGA-E1-A7YI	33	FEMALE	111	Dead	G3	Astrocytoma
TCGA-DU-A7T6	73	FEMALE	547	Dead	G3	Oligodendroglioma
TCGA-HT-A5R9	48	FEMALE	2	Alive	G3	Oligodendroglioma
TCGA-DU-8162	61	FEMALE	444	Dead	G3	Oligoastrocytoma
TCGA-S9-A7IX	57	MALE	819	Dead	G3	Astrocytoma
TCGA-DU-8163	29	MALE	629	Alive	G3	Oligoastrocytoma
TCGA-DU-6392	35	FEMALE	6423	Alive	G3	Astrocytoma
TCGA-P5-A72Z	64	FEMALE	354	Alive	G3	Oligodendroglioma
TCGA-TQ-A7RS	25	FEMALE			G2	Oligodendroglioma
TCGA-S9-A6UA	66	MALE	178	Dead	G3	Astrocytoma
TCGA-DB-5270	38	FEMALE	3733	Alive	G3	Oligoastrocytoma
TCGA-DU-A7T8	35	MALE	4229	Dead	G3	Oligoastrocytoma
TCGA-FG-6690	70	MALE	1294	Alive	G2	Oligodendroglioma
TCGA-HT-A5RA	65	FEMALE	832	Alive	G3	Astrocytoma
TCGA-HT-A61B	22	MALE	533	Alive	G3	Astrocytoma
TCGA-S9-A7IZ	48	FEMALE	608	Alive	G3	Astrocytoma
TCGA-P5-A77X	55	FEMALE	105	Alive	G2	Oligoastrocytoma
TCGA-DB-5273	33	MALE	2493	Alive	G3	Astrocytoma
TCGA-RY-A83X	46	FEMALE	939	Alive	G2	Oligodendroglioma
TCGA-DU-6407	35	FEMALE	2875	Dead	G2	Oligodendroglioma
TCGA-HT-8010	64	FEMALE	50	Alive	G2	Oligodendroglioma
TCGA-S9-A6TX	46	MALE	1245	Alive	G3	Oligodendroglioma
TCGA-FG-5963	23	MALE	775	Dead	G3	Astrocytoma
TCGA-HT-7602	21	MALE	908	Alive	G2	Oligodendroglioma
TCGA-S9-A7J0	30	FEMALE	609	Alive	G3	Oligodendroglioma
TCGA-HT-7877	20	FEMALE	4	Alive	G2	Oligodendroglioma
TCGA-TQ-A7RJ	25	FEMALE	1229	Alive	G2	Oligoastrocytoma
TCGA-DU-7299	33	MALE	1339	Dead	G3	Astrocytoma
TCGA-HT-8108	26	FEMALE	76	Alive	G2	Oligodendroglioma
TCGA-FG-A87Q	61	FEMALE	174	Alive	G3	Astrocytoma
TCGA-P5-A5EZ	39	MALE	70	Alive	G3	Astrocytoma
TCGA-DU-7309	41	FEMALE	84	Alive	G3	Oligodendroglioma
TCGA-DU-A6S6	35	FEMALE	2893	Alive	G2	Oligoastrocytoma
TCGA-DH-5141	32	MALE	968	Alive	G3	Oligodendroglioma
TCGA-S9-A7R4	46	MALE	914	Alive	G3	Astrocytoma
TCGA-KT-A74X	26	MALE	438	Alive	G3	Oligoastrocytoma
TCGA-HT-7681	29	FEMALE	1359	Alive	G2	Oligoastrocytoma
TCGA-S9-A7R2	69	MALE	316	Dead	G3	Astrocytoma
TCGA-P5-A72U	71	FEMALE	7	Alive	G3	Oligodendroglioma
TCGA-QH-A6CW	43	MALE	414	Alive	G3	Oligoastrocytoma
TCGA-W9-A837	47	MALE	1553	Alive	G2	Oligodendroglioma
TCGA-HT-8015	21	MALE	3	Alive	G2	Astrocytoma
TCGA-DH-A669	70	MALE	919	Dead	G3	Oligodendroglioma
TCGA-HT-A614	47	MALE	82	Alive	G2	Oligoastrocytoma
TCGA-DU-6394	53	MALE	682	Dead	G3	Oligodendroglioma
TCGA-DU-7009	32	FEMALE	4695	Dead	G2	Oligodendroglioma
TCGA-P5-A736	44	FEMALE	230	Alive	G3	Astrocytoma
TCGA-S9-A6WH	73	FEMALE	1173	Alive	G2	Oligoastrocytoma
TCGA-WH-A86K	65	MALE	405	Alive	G2	Astrocytoma
TCGA-S9-A6WG	31	MALE	2602	Alive	G3	Astrocytoma
TCGA-DU-5851	40	FEMALE	531	Alive	G3	Oligoastrocytoma
TCGA-S9-A7R3	28	FEMALE	3013	Alive	G2	Astrocytoma
TCGA-DB-A4XA	30	MALE	573	Alive	G2	Oligoastrocytoma
TCGA-R8-A6MO	53	FEMALE	993	Alive	G2	Oligodendroglioma
TCGA-E1-A7YN	63	FEMALE	727	Dead	G3	Astrocytoma
TCGA-CS-6667	39	FEMALE	1469	Alive	G2	Astrocytoma
TCGA-E1-A7YM	63	MALE	648	Dead	G3	Astrocytoma
TCGA-E1-A7YL	46	MALE	492	Dead	G3	Astrocytoma
TCGA-HT-7480	33	MALE	2287	Alive	G2	Oligodendroglioma
TCGA-CS-6670	43	MALE	1426	Alive	G3	Oligodendroglioma
TCGA-HT-A619	51	FEMALE	651	Alive	G3	Oligodendroglioma
TCGA-TQ-A8XE	42	FEMALE	954	Dead	G2	Oligodendroglioma
TCGA-P5-A737	47	MALE	372	Alive	G2	Oligoastrocytoma
TCGA-DU-A7TB	56	MALE	1567	Alive	G2	Oligodendroglioma
TCGA-HT-A4DS	55	FEMALE	7	Alive	G3	Astrocytoma
TCGA-DU-7300	53	FEMALE	1886	Dead	G3	Oligodendroglioma
TCGA-DU-7008	41	FEMALE	4752	Alive	G2	Oligodendroglioma
TCGA-DH-A66D	43	FEMALE	846	Alive	G3	Astrocytoma
TCGA-QH-A65X	28	FEMALE	482	Alive	G3	Oligoastrocytoma
TCGA-HW-8320	36	MALE	1217	Alive	G3	Astrocytoma
TCGA-S9-A7QZ	41	MALE	826	Alive	G2	Oligodendroglioma
TCGA-R8-A73M	48	FEMALE	1806	Alive	G2	Oligodendroglioma
TCGA-QH-A6CU	52	FEMALE	451	Alive	G3	Oligodendroglioma
TCGA-HT-8105	54	MALE	190	Alive	G3	Oligodendroglioma
TCGA-VM-A8CE	25	MALE	1191	Alive	G2	Oligodendroglioma
TCGA-S9-A6TU	38	MALE	2650	Alive	G2	Astrocytoma
TCGA-HT-7688	59	MALE	964	Alive	G3	Oligodendroglioma
TCGA-HT-8011	55	MALE	494	Alive	G3	Astrocytoma
TCGA-TM-A84H	44	FEMALE	926	Alive	G3	Oligoastrocytoma
TCGA-DU-6405	51	FEMALE	605	Dead	G3	Astrocytoma
TCGA-CS-6186	58	MALE	538	Dead	G3	Oligoastrocytoma
TCGA-FG-A87N	37	FEMALE	567	Alive	G3	Astrocytoma
TCGA-HT-7471	37	FEMALE	4	Alive	G3	Oligodendroglioma
TCGA-FG-A70Z	53	FEMALE	328	Alive	G3	Oligoastrocytoma
TCGA-HW-8321	31	MALE	1294	Alive	G3	Astrocytoma
TCGA-P5-A5F1	30	MALE	179	Alive	G2	Astrocytoma
TCGA-P5-A5EV	39	MALE	7	Alive	G2	Astrocytoma
TCGA-TQ-A7RW	32	MALE	821	Dead	G2	Oligodendroglioma
TCGA-HT-8114	36	MALE	1040	Alive	G3	Oligoastrocytoma
TCGA-HT-7478	36	MALE	194	Alive	G2	Astrocytoma
TCGA-DH-A7UT	30	MALE	531	Dead	G3	Astrocytoma
TCGA-HT-7604	50	MALE	3725	Alive	G2	Astrocytoma
TCGA-DU-5855	49	FEMALE	207	Alive	G3	Oligoastrocytoma
TCGA-DH-A66B	52	MALE	1279	Alive	G3	Astrocytoma
TCGA-DU-5847	34	FEMALE	548	Alive	G3	Astrocytoma
TCGA-DB-A4XC	26	MALE	1421	Alive	G2	Oligoastrocytoma
TCGA-DU-8165	60	FEMALE	582	Alive	G3	Oligodendroglioma
TCGA-QH-A6CX	66	MALE	372	Dead	G2	Astrocytoma
TCGA-S9-A7QX	36	FEMALE	564	Alive	G3	Astrocytoma
TCGA-HT-7874	41	FEMALE	1130	Alive	G3	Oligodendroglioma
TCGA-DH-A66G	49	FEMALE	523	Alive	G3	Oligodendroglioma
TCGA-HT-8111	32	MALE	7	Alive	G3	Oligoastrocytoma
TCGA-DU-A6S3	60	MALE	656	Alive	G2	Oligodendroglioma
TCGA-DU-7290	45	FEMALE	315	Dead	G3	Astrocytoma
TCGA-HT-7469	30	MALE	351	Dead	G3	Oligodendroglioma
TCGA-QH-A6X5	58	FEMALE	497	Alive	G2	Oligoastrocytoma
TCGA-DU-6404	24	FEMALE	4068	Dead	G3	Oligodendroglioma
TCGA-CS-6188	48	MALE	814	Dead	G3	Astrocytoma
TCGA-HT-7485	42	MALE	122	Alive	G2	Astrocytoma
TCGA-QH-A870	38	FEMALE	395	Alive	G3	Oligoastrocytoma
TCGA-HT-A61C	66	MALE	537	Dead	G3	Oligodendroglioma
TCGA-P5-A5F2	36	FEMALE	242	Alive	G2	Astrocytoma
TCGA-CS-5396	53	FEMALE	1631	Alive	G3	Oligodendroglioma
TCGA-DU-6395	31	MALE	1491	Dead	G2	Oligoastrocytoma
TCGA-TM-A84J	63	MALE	735	Alive	G3	Oligodendroglioma
TCGA-HT-7687	74	MALE	3	Alive	G3	Oligodendroglioma
TCGA-S9-A6U9	36	MALE	2918	Alive	G3	Astrocytoma
TCGA-S9-A6WO	29	MALE	566	Alive	G2	Astrocytoma
TCGA-CS-6668	57	FEMALE	1519	Alive	G2	Oligodendroglioma
TCGA-HW-A5KK	64	MALE	388	Dead	G3	Astrocytoma
TCGA-WY-A859	34	FEMALE	1213	Alive	G2	Astrocytoma
TCGA-DH-A7UU	43	MALE	417	Alive	G3	Astrocytoma
TCGA-S9-A7QW	54	FEMALE	458	Alive	G3	Astrocytoma
TCGA-QH-A65V	43	FEMALE	384	Alive	G2	Oligodendroglioma
TCGA-WY-A85E	48	FEMALE	633	Alive	G2	Oligoastrocytoma
TCGA-DU-7012	74	FEMALE	199	Dead	G3	Astrocytoma
TCGA-CS-6669	26	FEMALE	1494	Alive	G2	Oligodendroglioma
TCGA-TQ-A7RI	37	FEMALE	62	Alive	G2	Oligodendroglioma
TCGA-HT-8012	30	FEMALE	286	Alive	G2	Oligodendroglioma
TCGA-F6-A8O3	34	MALE	7	Alive	G2	Oligodendroglioma
TCGA-TQ-A7RO	29	MALE	949	Alive	G2	Oligoastrocytoma
TCGA-S9-A7J1	43	MALE	249	Alive	G2	Oligodendroglioma
TCGA-TM-A84B	40	MALE	758	Dead	G3	Astrocytoma
TCGA-DB-A64X	56	FEMALE	563	Alive	G3	Astrocytoma
TCGA-FG-A713	74	FEMALE	622	Alive	G2	Oligoastrocytoma
TCGA-E1-A7YH	47	FEMALE	2835	Dead	G3	Astrocytoma
TCGA-DB-A64S	20	MALE	835	Alive	G2	Oligoastrocytoma
TCGA-DU-6408	23	FEMALE	3470	Dead	G3	Oligodendroglioma
TCGA-QH-A6X4	47	MALE	442	Alive	G3	Oligoastrocytoma
TCGA-DU-7019	39	MALE	800	Alive	Discrepancy	Oligoastrocytoma
TCGA-DU-A76K	87	MALE	347	Dead	G2	Oligodendroglioma
TCGA-R8-A6MK	40	MALE	2702	Alive	G2	Oligodendroglioma
TCGA-HT-7879	31	MALE	112	Alive	G3	Oligoastrocytoma
TCGA-S9-A6WP	42	MALE	567	Alive	G3	Oligoastrocytoma
TCGA-HT-8019	34	FEMALE	1004	Alive	G3	Oligodendroglioma
TCGA-QH-A6CY	38	MALE	408	Alive	G3	Oligoastrocytoma
TCGA-VW-A7QS	35	FEMALE	706	Alive	G3	Oligodendroglioma
TCGA-HT-7605	38	MALE	139	Alive	G2	Oligodendroglioma
TCGA-S9-A6WN	38	FEMALE	805	Alive	G3	Astrocytoma
TCGA-CS-6290	31	MALE	1137	Dead	G3	Astrocytoma
TCGA-DB-A4XE	27	FEMALE	1139	Alive	G3	Oligoastrocytoma
TCGA-TQ-A7RQ	38	FEMALE	795	Alive	G2	Oligodendroglioma
TCGA-HT-7606	30	FEMALE	526	Alive	G2	Astrocytoma
TCGA-HT-7882	66	MALE	113	Dead	G3	Oligodendroglioma
TCGA-DU-A6S8	74	FEMALE	678	Alive	G3	Oligodendroglioma
TCGA-CS-4942	44	FEMALE	1335	Dead	G3	Astrocytoma
TCGA-FG-A4MU	58	MALE	326	Alive	G3	Oligoastrocytoma
TCGA-HT-7902	30	FEMALE	956	Alive	G2	Oligoastrocytoma
TCGA-HT-A5RC	70	FEMALE	162	Dead	G3	Astrocytoma
TCGA-WY-A85B	24	MALE	1393	Alive	G2	Astrocytoma
TCGA-DU-6410	56	MALE	242	Alive	G3	Oligodendroglioma
TCGA-FG-A711	33	FEMALE	1481	Dead	G2	Oligodendroglioma
TCGA-E1-A7Z3	31	FEMALE	2235	Dead	G2	Astrocytoma
TCGA-DB-A75K	55	FEMALE	368	Alive	G3	Oligoastrocytoma
TCGA-CS-4938	31	FEMALE	3574	Alive	G2	Astrocytoma
TCGA-DH-A7US	50	MALE	706	Alive	G2	Oligodendroglioma
TCGA-DU-A7TJ	55	MALE	17	Alive	G3	Astrocytoma
TCGA-P5-A733	52	FEMALE	414	Alive	G2	Astrocytoma
TCGA-RY-A83Y	45	MALE	166	Alive	G2	Oligodendroglioma
TCGA-DU-5874	62	FEMALE	461	Alive	G2	Oligodendroglioma
TCGA-HW-7487	39	MALE	1382	Alive	G2	Oligodendroglioma
TCGA-HW-8322	39	MALE	758	Alive	G2	Oligodendroglioma
TCGA-FG-A70Y	20	FEMALE	868	Alive	G2	Oligodendroglioma
TCGA-E1-A7YO	45	MALE	2282	Dead	G3	Oligodendroglioma
TCGA-E1-5302	41	MALE	1525	Dead	G3	Astrocytoma
TCGA-HT-7873	29	MALE	718	Alive	G2	Oligoastrocytoma
TCGA-DU-5870	34	FEMALE	5546	Alive	G2	Oligodendroglioma
TCGA-HT-7858	28	MALE	1540	Alive	G2	Astrocytoma
TCGA-DU-5852	61	FEMALE	205	Dead	G3	Oligoastrocytoma
TCGA-FG-7641	31	MALE	627	Alive	G2	Oligodendroglioma
TCGA-QH-A65Z	54	MALE	427	Alive	G2	Oligodendroglioma
TCGA-HW-7493	40	FEMALE	2107	Alive	G2	Astrocytoma
TCGA-TQ-A7RF	27	FEMALE	650	Alive	G3	Oligodendroglioma
TCGA-HT-7689	58	FEMALE	455	Alive	G2	Oligodendroglioma
TCGA-HT-7607	61	FEMALE	96	Dead	G2	Astrocytoma
TCGA-DU-7011	25	MALE	3200	Dead	G2	Oligoastrocytoma
TCGA-FG-6691	23	FEMALE	1257	Alive	G2	Astrocytoma
TCGA-HT-7676	26	MALE	5	Alive	G2	Oligodendroglioma
TCGA-HT-A5R5	33	FEMALE	4	Alive	G2	Oligodendroglioma
TCGA-FG-A4MX	47	MALE	569	Alive	G2	Astrocytoma
TCGA-FG-6689	30	MALE	454	Alive	G2	Astrocytoma
TCGA-DU-6402	52	MALE	214	Dead	G3	Astrocytoma
TCGA-DU-A6S7	27	FEMALE	638	Alive	G3	Astrocytoma
TCGA-QH-A6X8	56	FEMALE	509	Alive	G3	Oligodendroglioma
TCGA-S9-A7R8	44	FEMALE	961	Dead	G3	Astrocytoma

## Sheet: Sheet2
A0_Samples	A17_Age	A18_Sex	A1_OS	A2_Event	A7_Grade	A22_histological_type
TCGA-HT-7472	38	MALE	1	Alive	G2	Oligodendroglioma
TCGA-HT-A5R9	48	FEMALE	2	Alive	G3	Oligodendroglioma
TCGA-HT-A74O	34	MALE	3	Alive	G3	Astrocytoma
TCGA-HT-8106	53	MALE	3	Alive	G3	Astrocytoma
TCGA-VM-A8CB	33	MALE	3	Alive	G3	Oligodendroglioma
TCGA-HT-A5RB	24	MALE	3	Alive	G2	Astrocytoma
TCGA-HT-7467	54	MALE	3	Alive	G2	Oligodendroglioma
TCGA-HT-7691	31	FEMALE	3	Alive	G2	Astrocytoma
TCGA-HT-7690	29	MALE	3	Alive	G3	Oligoastrocytoma
TCGA-HT-8015	21	MALE	3	Alive	G2	Astrocytoma
TCGA-HT-7687	74	MALE	3	Alive	G3	Oligodendroglioma
TCGA-HT-7877	20	FEMALE	4	Alive	G2	Oligodendroglioma
TCGA-HT-7471	37	FEMALE	4	Alive	G3	Oligodendroglioma
TCGA-HT-A5R5	33	FEMALE	4	Alive	G2	Oligodendroglioma
TCGA-HT-7676	26	MALE	5	Alive	G2	Oligodendroglioma
TCGA-F6-A8O4	44	MALE	6	Alive	G2	Astrocytoma
TCGA-HT-7857	24	FEMALE	7	Alive	G3	Astrocytoma
TCGA-HT-7616	75	MALE	7	Dead	G3	Oligodendroglioma
TCGA-P5-A72U	71	FEMALE	7	Alive	G3	Oligodendroglioma
TCGA-HT-A4DS	55	FEMALE	7	Alive	G3	Astrocytoma
TCGA-P5-A5EV	39	MALE	7	Alive	G2	Astrocytoma
TCGA-HT-8111	32	MALE	7	Alive	G3	Oligoastrocytoma
TCGA-F6-A8O3	34	MALE	7	Alive	G2	Oligodendroglioma
TCGA-CS-5394	40	MALE	8	Alive	G3	Astrocytoma
TCGA-HT-7875	56	MALE	10	Alive	G2	Oligodendroglioma
TCGA-HT-8107	62	MALE	14	Alive	G2	Oligodendroglioma
TCGA-HT-7860	60	FEMALE	15	Alive	G3	Astrocytoma
TCGA-DU-A7TJ	55	MALE	17	Alive	G3	Astrocytoma
TCGA-HT-7680	32	FEMALE	23	Alive	G2	Astrocytoma
TCGA-E1-A7YU	42	MALE	23	Dead	G3	Oligoastrocytoma
TCGA-DU-6400	66	FEMALE	37	Dead	G2	Oligodendroglioma
TCGA-P5-A5F6	26	MALE	39	Alive	G2	Oligodendroglioma
TCGA-HT-8010	64	FEMALE	50	Alive	G2	Oligodendroglioma
TCGA-HT-A616	36	FEMALE	55	Alive	G2	Astrocytoma
TCGA-QH-A6X9	73	FEMALE	58	Alive	G2	Oligodendroglioma
TCGA-S9-A7J2	25	MALE	62	Alive	G3	Oligodendroglioma
TCGA-TQ-A7RI	37	FEMALE	62	Alive	G2	Oligodendroglioma
TCGA-RY-A843	30	MALE	63	Alive	G3	Astrocytoma
TCGA-P5-A5EZ	39	MALE	70	Alive	G3	Astrocytoma
TCGA-P5-A780	44	FEMALE	72	Alive	G3	Astrocytoma
TCGA-P5-A5EY	21	MALE	72	Alive	G2	Astrocytoma
TCGA-DU-6542	25	MALE	73	Alive	G3	Oligoastrocytoma
TCGA-HT-A74H	62	MALE	74	Alive	G3	Astrocytoma
TCGA-HT-8108	26	FEMALE	76	Alive	G2	Oligodendroglioma
TCGA-QH-A65S	32	FEMALE	77	Alive	G2	Oligoastrocytoma
TCGA-HT-A614	47	MALE	82	Alive	G2	Oligoastrocytoma
TCGA-DU-7309	41	FEMALE	84	Alive	G3	Oligodendroglioma
TCGA-HT-7692	43	MALE	90	Alive	G2	Oligoastrocytoma
TCGA-HT-7607	61	FEMALE	96	Dead	G2	Astrocytoma
TCGA-P5-A77X	55	FEMALE	105	Alive	G2	Oligoastrocytoma
TCGA-E1-A7YI	33	FEMALE	111	Dead	G3	Astrocytoma
TCGA-HT-7879	31	MALE	112	Alive	G3	Oligoastrocytoma
TCGA-HT-7882	66	MALE	113	Dead	G3	Oligodendroglioma
TCGA-HT-7474	52	MALE	114	Alive	G2	Oligoastrocytoma
TCGA-HT-7485	42	MALE	122	Alive	G2	Astrocytoma
TCGA-P5-A781	34	FEMALE	134	Alive	G3	Astrocytoma
TCGA-HT-7605	38	MALE	139	Alive	G2	Oligodendroglioma
TCGA-HT-7601	30	FEMALE	153	Alive	G3	Astrocytoma
TCGA-DU-8158	57	FEMALE	155	Dead	G3	Astrocytoma
TCGA-HT-7880	30	MALE	162	Alive	G2	Oligoastrocytoma
TCGA-HT-A5RC	70	FEMALE	162	Dead	G3	Astrocytoma
TCGA-RY-A83Y	45	MALE	166	Alive	G2	Oligodendroglioma
TCGA-HT-8109	64	MALE	169	Alive	G3	Oligodendroglioma
TCGA-FG-A87Q	61	FEMALE	174	Alive	G3	Astrocytoma
TCGA-S9-A6UA	66	MALE	178	Dead	G3	Astrocytoma
TCGA-P5-A5F1	30	MALE	179	Alive	G2	Astrocytoma
TCGA-DB-A64Q	31	FEMALE	182	Alive	G2	Oligoastrocytoma
TCGA-HT-7684	58	MALE	184	Alive	G3	Oligoastrocytoma
TCGA-HT-8105	54	MALE	190	Alive	G3	Oligodendroglioma
TCGA-CS-5397	54	FEMALE	194	Dead	G3	Astrocytoma
TCGA-HT-A61A	20	FEMALE	194	Alive	G2	Oligodendroglioma
TCGA-HT-7478	36	MALE	194	Alive	G2	Astrocytoma
TCGA-HT-7476	26	MALE	199	Alive	G2	Astrocytoma
TCGA-DU-7012	74	FEMALE	199	Dead	G3	Astrocytoma
TCGA-HT-7468	30	MALE	203	Alive	G3	Oligodendroglioma
TCGA-P5-A5EW	20	FEMALE	204	Alive	G2	Astrocytoma
TCGA-DU-5852	61	FEMALE	205	Dead	G3	Oligoastrocytoma
TCGA-DU-5855	49	FEMALE	207	Alive	G3	Oligoastrocytoma
TCGA-HT-7694	60	MALE	210	Alive	G3	Oligodendroglioma
TCGA-DU-6402	52	MALE	214	Dead	G3	Astrocytoma
TCGA-DU-A7TD	52	MALE	228	Dead	G3	Oligoastrocytoma
TCGA-P5-A736	44	FEMALE	230	Alive	G3	Astrocytoma
TCGA-P5-A5F4	35	FEMALE	231	Alive	G3	Oligodendroglioma
TCGA-CS-4941	67	MALE	234	Dead	G3	Astrocytoma
TCGA-VM-A8CD	58	MALE	240	Dead	G3	Astrocytoma
TCGA-S9-A7IS	33	FEMALE	241	Dead	G3	Astrocytoma
TCGA-DU-7292	69	MALE	242	Dead	G3	Astrocytoma
TCGA-P5-A5F2	36	FEMALE	242	Alive	G2	Astrocytoma
TCGA-DU-6410	56	MALE	242	Alive	G3	Oligodendroglioma
TCGA-P5-A5EX	41	FEMALE	243	Alive	G3	Oligodendroglioma
TCGA-VW-A8FI	66	MALE	245	Dead	G3	Astrocytoma
TCGA-S9-A7J1	43	MALE	249	Alive	G2	Oligodendroglioma
TCGA-DU-5854	57	FEMALE	257	Alive	G3	Astrocytoma
TCGA-DU-7013	59	MALE	269	Dead	G3	Astrocytoma
TCGA-P5-A731	59	FEMALE	274	Alive	G2	Oligoastrocytoma
TCGA-QH-A6CZ	38	MALE	279	Alive	G2	Oligoastrocytoma
TCGA-HT-8012	30	FEMALE	286	Alive	G2	Oligodendroglioma
TCGA-P5-A5F0	33	MALE	287	Alive	G2	Oligodendroglioma
TCGA-P5-A735	38	FEMALE	292	Alive	G2	Astrocytoma
TCGA-RY-A83Z	54	FEMALE	301	Alive	G3	Astrocytoma
TCGA-QH-A6X3	27	MALE	313	Alive	G2	Oligoastrocytoma
TCGA-DU-7290	45	FEMALE	315	Dead	G3	Astrocytoma
TCGA-S9-A7R2	69	MALE	316	Dead	G3	Astrocytoma
TCGA-P5-A72W	35	MALE	317	Alive	G3	Astrocytoma
TCGA-HT-A74J	33	MALE	320	Alive	G2	Oligoastrocytoma
TCGA-FG-A4MU	58	MALE	326	Alive	G3	Oligoastrocytoma
TCGA-FG-A70Z	53	FEMALE	328	Alive	G3	Oligoastrocytoma
TCGA-P5-A730	22	MALE	333	Alive	G3	Oligoastrocytoma
TCGA-HT-A74L	22	FEMALE	336	Alive	G2	Oligoastrocytoma
TCGA-QH-A86X	33	MALE	337	Alive	G2	Oligodendroglioma
TCGA-DB-A75L	36	FEMALE	342	Alive	G3	Astrocytoma
TCGA-HT-7884	44	FEMALE	343	Alive	G2	Astrocytoma
TCGA-DU-A76K	87	MALE	347	Dead	G2	Oligodendroglioma
TCGA-DU-7006	60	FEMALE	349	Dead	G3	Astrocytoma
TCGA-HT-7469	30	MALE	351	Dead	G3	Oligodendroglioma
TCGA-DU-6403	60	FEMALE	354	Dead	G3	Oligoastrocytoma
TCGA-P5-A72Z	64	FEMALE	354	Alive	G3	Oligodendroglioma
TCGA-DB-A75K	55	FEMALE	368	Alive	G3	Oligoastrocytoma
TCGA-HT-8104	51	FEMALE	372	Alive	G3	Astrocytoma
TCGA-P5-A737	47	MALE	372	Alive	G2	Oligoastrocytoma
TCGA-QH-A6CX	66	MALE	372	Dead	G2	Astrocytoma
TCGA-E1-A7YK	52	MALE	378	Dead	G3	Astrocytoma
TCGA-QH-A65V	43	FEMALE	384	Alive	G2	Oligodendroglioma
TCGA-HW-A5KK	64	MALE	388	Dead	G3	Astrocytoma
TCGA-QH-A870	38	FEMALE	395	Alive	G3	Oligoastrocytoma
TCGA-E1-A7Z2	58	FEMALE	398	Dead	G2	Oligodendroglioma
TCGA-P5-A72X	21	MALE	403	Alive	G3	Astrocytoma
TCGA-WH-A86K	65	MALE	405	Alive	G2	Astrocytoma
TCGA-DU-5853	29	MALE	407	Alive	G2	Oligoastrocytoma
TCGA-QH-A6CY	38	MALE	408	Alive	G3	Oligoastrocytoma
TCGA-VM-A8CA	54	MALE	411	Alive	G2	Oligodendroglioma
TCGA-QH-A6CW	43	MALE	414	Alive	G3	Oligoastrocytoma
TCGA-P5-A733	52	FEMALE	414	Alive	G2	Astrocytoma
TCGA-FG-8182	35	MALE	416	Alive	G2	Oligodendroglioma
TCGA-DH-A7UU	43	MALE	417	Alive	G3	Astrocytoma
TCGA-HT-8558	29	FEMALE	418	Alive	G2	Oligodendroglioma
TCGA-HT-8110	57	MALE	419	Alive	G3	Astrocytoma
TCGA-QH-A65Z	54	MALE	427	Alive	G2	Oligodendroglioma
TCGA-S9-A6WQ	57	FEMALE	428	Alive	G2	Oligoastrocytoma
TCGA-DU-8168	55	FEMALE	431	Alive	G3	Oligodendroglioma
TCGA-FG-8185	37	MALE	433	Alive	G3	Astrocytoma
TCGA-HT-7620	40	MALE	434	Alive	G3	Oligodendroglioma
TCGA-E1-A7YD	57	MALE	435	Dead	G3	Astrocytoma
TCGA-DB-A64W	65	FEMALE	438	Dead	G3	Oligoastrocytoma
TCGA-KT-A7W1	45	FEMALE	438	Alive	G3	Astrocytoma
TCGA-KT-A74X	26	MALE	438	Alive	G3	Oligoastrocytoma
TCGA-QH-A6CV	51	MALE	442	Alive	G3	Oligoastrocytoma
TCGA-HT-7695	29	FEMALE	442	Alive	G2	Oligodendroglioma
TCGA-QH-A6X4	47	MALE	442	Alive	G3	Oligoastrocytoma
TCGA-DU-5849	48	MALE	443	Alive	G2	Oligodendroglioma
TCGA-DU-8162	61	FEMALE	444	Dead	G3	Oligoastrocytoma
TCGA-FG-A60J	47	FEMALE	449	Alive	G2	Oligoastrocytoma
TCGA-QH-A6CU	52	FEMALE	451	Alive	G3	Oligodendroglioma
TCGA-TM-A84S	36	MALE	454	Alive	G3	Oligodendroglioma
TCGA-FG-6689	30	MALE	454	Alive	G2	Astrocytoma
TCGA-FG-8188	41	MALE	455	Alive	G2	Oligoastrocytoma
TCGA-HT-7689	58	FEMALE	455	Alive	G2	Oligodendroglioma
TCGA-DU-7010	58	FEMALE	456	Dead	G3	Astrocytoma
TCGA-FG-A6IZ	60	MALE	457	Alive	G2	Oligodendroglioma
TCGA-S9-A7QW	54	FEMALE	458	Alive	G3	Astrocytoma
TCGA-QH-A65R	38	FEMALE	461	Alive	G3	Oligodendroglioma
TCGA-DU-5874	62	FEMALE	461	Alive	G2	Oligodendroglioma
TCGA-E1-A7YS	71	MALE	466	Dead	G3	Oligodendroglioma
TCGA-HT-A74K	58	FEMALE	467	Alive	G3	Oligodendroglioma
TCGA-FG-7634	28	MALE	467	Alive	G2	Oligodendroglioma
TCGA-DU-8167	69	FEMALE	471	Alive	G2	Oligoastrocytoma
TCGA-HT-8564	47	MALE	478	Alive	G3	Astrocytoma
TCGA-QH-A65X	28	FEMALE	482	Alive	G3	Oligoastrocytoma
TCGA-TQ-A7RH	39	MALE	486	Alive	G2	Oligoastrocytoma
TCGA-FG-8186	42	FEMALE	487	Alive	G3	Oligoastrocytoma
TCGA-VV-A86M	36	FEMALE	487	Alive	G3	Astrocytoma
TCGA-HT-A617	47	MALE	491	Alive	G2	Oligodendroglioma
TCGA-TM-A84C	32	MALE	492	Dead	G2	Astrocytoma
TCGA-DB-A75P	25	FEMALE	492	Alive	G2	Astrocytoma
TCGA-E1-A7YL	46	MALE	492	Dead	G3	Astrocytoma
TCGA-HT-7677	53	MALE	494	Alive	G3	Oligodendroglioma
TCGA-HT-8011	55	MALE	494	Alive	G3	Astrocytoma
TCGA-QH-A6X5	58	FEMALE	497	Alive	G2	Oligoastrocytoma
TCGA-FG-A6J1	44	FEMALE	500	Alive	G2	Oligodendroglioma
TCGA-QH-A6XA	23	FEMALE	502	Alive	G2	Oligoastrocytoma
TCGA-HT-7473	28	MALE	503	Alive	G2	Oligoastrocytoma
TCGA-QH-A6XC	48	MALE	508	Alive	G3	Astrocytoma
TCGA-QH-A6X8	56	FEMALE	509	Alive	G3	Oligodendroglioma
TCGA-HT-A618	37	FEMALE	512	Alive	G3	Astrocytoma
TCGA-DU-6406	59	FEMALE	512	Dead	G3	Oligoastrocytoma
TCGA-HT-A615	38	FEMALE	515	Alive	G2	Oligodendroglioma
TCGA-DU-8166	29	FEMALE	516	Alive	G2	Oligoastrocytoma
TCGA-DU-A76O	30	MALE	522	Alive	G2	Astrocytoma
TCGA-DH-A66F	49	MALE	523	Alive	G2	Oligodendroglioma
TCGA-DH-A66G	49	FEMALE	523	Alive	G3	Oligodendroglioma
TCGA-HT-7606	30	FEMALE	526	Alive	G2	Astrocytoma
TCGA-HT-7475	67	MALE	530	Alive	G3	Oligoastrocytoma
TCGA-DU-5851	40	FEMALE	531	Alive	G3	Oligoastrocytoma
TCGA-DH-A7UT	30	MALE	531	Dead	G3	Astrocytoma
TCGA-DU-5872	43	FEMALE	532	Alive	G2	Oligoastrocytoma
TCGA-HT-7693	51	FEMALE	533	Alive	G2	Oligodendroglioma
TCGA-HT-A61B	22	MALE	533	Alive	G3	Astrocytoma
TCGA-HT-A61C	66	MALE	537	Dead	G3	Oligodendroglioma
TCGA-CS-6186	58	MALE	538	Dead	G3	Oligoastrocytoma
TCGA-FG-A60K	34	FEMALE	542	Alive	G2	Oligoastrocytoma
TCGA-DB-A75M	47	MALE	544	Alive	G2	Astrocytoma
TCGA-FG-7636	48	MALE	544	Alive	G3	Astrocytoma
TCGA-DU-A7T6	73	FEMALE	547	Dead	G3	Oligodendroglioma
TCGA-DU-5847	34	FEMALE	548	Alive	G3	Astrocytoma
TCGA-FG-A4MW	63	MALE	559	Dead	G3	Oligoastrocytoma
TCGA-FG-6692	63	MALE	561	Dead	G3	Oligodendroglioma
TCGA-DB-A64X	56	FEMALE	563	Alive	G3	Astrocytoma
TCGA-S9-A7QX	36	FEMALE	564	Alive	G3	Astrocytoma
TCGA-DH-A7UV	49	MALE	566	Alive	G3	Astrocytoma
TCGA-TM-A84R	46	MALE	566	Alive	G2	Oligodendroglioma
TCGA-S9-A6WO	29	MALE	566	Alive	G2	Astrocytoma
TCGA-FG-A87N	37	FEMALE	567	Alive	G3	Astrocytoma
TCGA-S9-A6WP	42	MALE	567	Alive	G3	Oligoastrocytoma
TCGA-S9-A89V	70	MALE	569	Alive	G3	Astrocytoma
TCGA-FG-A4MX	47	MALE	569	Alive	G2	Astrocytoma
TCGA-FG-6688	59	FEMALE	571	Alive	G3	Astrocytoma
TCGA-S9-A6TV	50	MALE	571	Alive	G3	Oligoastrocytoma
TCGA-DB-A4XA	30	MALE	573	Alive	G2	Oligoastrocytoma
TCGA-DU-5871	37	FEMALE	576	Alive	G2	Oligoastrocytoma
TCGA-DU-7298	38	FEMALE	576	Dead	G3	Astrocytoma
TCGA-IK-7675	43	MALE	578	Dead	G2	Oligodendroglioma
TCGA-DU-8165	60	FEMALE	582	Alive	G3	Oligodendroglioma
TCGA-P5-A77W	37	FEMALE	584	Alive	G3	Oligoastrocytoma
TCGA-HT-7855	39	MALE	585	Alive	G3	Astrocytoma
TCGA-QH-A6CS	41	MALE	588	Alive	G3	Astrocytoma
TCGA-E1-A7YJ	55	MALE	592	Dead	G3	Astrocytoma
TCGA-RY-A845	40	FEMALE	596	Alive	G2	Oligoastrocytoma
TCGA-TQ-A7RG	36	MALE	599	Alive	G2	Oligoastrocytoma
TCGA-S9-A6WM	59	FEMALE	604	Alive	G3	Astrocytoma
TCGA-DU-6405	51	FEMALE	605	Dead	G3	Astrocytoma
TCGA-DH-5140	38	FEMALE	607	Dead	G3	Oligoastrocytoma
TCGA-S9-A7IZ	48	FEMALE	608	Alive	G3	Astrocytoma
TCGA-VM-A8CF	44	FEMALE	609	Alive	G3	Astrocytoma
TCGA-S9-A7J0	30	FEMALE	609	Alive	G3	Oligodendroglioma
TCGA-FG-8187	31	MALE	611	Alive	G2	Oligoastrocytoma
TCGA-FG-7643	49	FEMALE	611	Alive	G2	Oligoastrocytoma
TCGA-HT-A5R7	33	FEMALE	615	Alive	G3	Astrocytoma
TCGA-FG-A713	74	FEMALE	622	Alive	G2	Oligoastrocytoma
TCGA-S9-A89Z	40	MALE	623	Alive	G3	Astrocytoma
TCGA-FG-7641	31	MALE	627	Alive	G2	Oligodendroglioma
TCGA-S9-A7J3	52	FEMALE	629	Alive	G3	Oligodendroglioma
TCGA-DU-8163	29	MALE	629	Alive	G3	Oligoastrocytoma
TCGA-HW-A5KM	35	MALE	630	Alive	G2	Astrocytoma
TCGA-WY-A85E	48	FEMALE	633	Alive	G2	Oligoastrocytoma
TCGA-DU-A6S7	27	FEMALE	638	Alive	G3	Astrocytoma
TCGA-CS-5395	43	MALE	639	Dead	G2	Oligodendroglioma
TCGA-DU-A76R	51	MALE	648	Dead	G3	Oligodendroglioma
TCGA-E1-A7YM	63	MALE	648	Dead	G3	Astrocytoma
TCGA-TQ-A7RF	27	FEMALE	650	Alive	G3	Oligodendroglioma
TCGA-DU-8164	51	MALE	651	Alive	G2	Oligodendroglioma
TCGA-HT-A619	51	FEMALE	651	Alive	G3	Oligodendroglioma
TCGA-FG-A60L	34	FEMALE	655	Alive	G2	Astrocytoma
TCGA-DU-A6S3	60	MALE	656	Alive	G2	Oligodendroglioma
TCGA-HT-7608	61	MALE	671	Alive	G2	Oligoastrocytoma
TCGA-FG-A6J3	52	FEMALE	677	Alive	G3	Astrocytoma
TCGA-DU-A6S8	74	FEMALE	678	Alive	G3	Oligodendroglioma
TCGA-DU-6394	53	MALE	682	Dead	G3	Oligodendroglioma
TCGA-FG-8189	33	FEMALE	685	Alive	G2	Oligodendroglioma
TCGA-FG-7638	31	FEMALE	686	Alive	G3	Oligodendroglioma
TCGA-HT-7603	29	MALE	705	Alive	G2	Oligodendroglioma
TCGA-VW-A7QS	35	FEMALE	706	Alive	G3	Oligodendroglioma
TCGA-DH-A7US	50	MALE	706	Alive	G2	Oligodendroglioma
TCGA-DU-7304	43	MALE	709	Dead	G3	Oligoastrocytoma
TCGA-VM-A8CH	24	FEMALE	714	Alive	G2	Astrocytoma
TCGA-S9-A7IY	39	MALE	715	Alive	G3	Oligoastrocytoma
TCGA-HT-7873	29	MALE	718	Alive	G2	Oligoastrocytoma
TCGA-FG-A4MY	44	FEMALE	721	Alive	G2	Oligoastrocytoma
TCGA-DU-8161	63	FEMALE	722	Dead	G3	Oligoastrocytoma
TCGA-TM-A84T	19	MALE	724	Alive	G2	Oligoastrocytoma
TCGA-E1-A7YN	63	FEMALE	727	Dead	G3	Astrocytoma
TCGA-TM-A84J	63	MALE	735	Alive	G3	Oligodendroglioma
TCGA-DB-A64L	67	FEMALE	736	Alive	G2	Oligodendroglioma
TCGA-HT-7477	62	MALE	738	Alive	G3	Astrocytoma
TCGA-S9-A6U0	46	MALE	742	Dead	G3	Astrocytoma
TCGA-DU-A5TT	70	MALE	743	Alive	G3	Oligodendroglioma
TCGA-DH-5144	56	FEMALE	748	Alive	G3	Oligodendroglioma
TCGA-TM-A84M	40	MALE	754	Alive	G3	Oligodendroglioma
TCGA-TM-A84B	40	MALE	758	Dead	G3	Astrocytoma
TCGA-HW-8322	39	MALE	758	Alive	G2	Oligodendroglioma
TCGA-DU-A5TW	33	FEMALE	760	Alive	G3	Astrocytoma
TCGA-TM-A84Q	31	MALE	772	Alive	G2	Astrocytoma
TCGA-DB-A64O	59	MALE	775	Dead	G2	Oligoastrocytoma
TCGA-FG-5963	23	MALE	775	Dead	G3	Astrocytoma
TCGA-DU-A6S2	37	FEMALE	777	Alive	G2	Oligodendroglioma
TCGA-S9-A6U1	22	FEMALE	785	Alive	G3	Astrocytoma
TCGA-TQ-A7RR	38	MALE	787	Alive	G2	Oligoastrocytoma
TCGA-DU-7301	53	MALE	788	Dead	G2	Oligodendroglioma
TCGA-HT-A4DV	51	FEMALE	792	Alive	G3	Oligodendroglioma
TCGA-TQ-A7RQ	38	FEMALE	795	Alive	G2	Oligodendroglioma
TCGA-DU-A5TU	62	FEMALE	796	Alive	G2	Astrocytoma
TCGA-DU-7019	39	MALE	800	Alive	Discrepancy	Oligoastrocytoma
TCGA-S9-A6WN	38	FEMALE	805	Alive	G3	Astrocytoma
TCGA-DU-A76L	54	MALE	814	Dead	G3	Oligodendroglioma
TCGA-CS-6188	48	MALE	814	Dead	G3	Astrocytoma
TCGA-S9-A7IX	57	MALE	819	Dead	G3	Astrocytoma
TCGA-TQ-A7RW	32	MALE	821	Dead	G2	Oligodendroglioma
TCGA-S9-A7QZ	41	MALE	826	Alive	G2	Oligodendroglioma
TCGA-HT-A5RA	65	FEMALE	832	Alive	G3	Astrocytoma
TCGA-DB-A64S	20	MALE	835	Alive	G2	Oligoastrocytoma
TCGA-FN-7833	25	MALE	837	Alive	G3	Oligoastrocytoma
TCGA-DB-A64U	38	FEMALE	846	Alive	G2	Oligoastrocytoma
TCGA-DH-A66D	43	FEMALE	846	Alive	G3	Astrocytoma
TCGA-RY-A840	47	MALE	854	Alive	G3	Oligodendroglioma
TCGA-TM-A84I	30	MALE	854	Alive	G3	Astrocytoma
TCGA-HT-8563	30	FEMALE	860	Alive	G3	Astrocytoma
TCGA-FG-8181	23	MALE	862	Alive	G3	Oligoastrocytoma
TCGA-S9-A7QY	35	FEMALE	863	Alive	G2	Oligoastrocytoma
TCGA-FG-A70Y	20	FEMALE	868	Alive	G2	Oligodendroglioma
TCGA-HW-A5KL	42	FEMALE	878	Alive	G2	Astrocytoma
TCGA-E1-A7YE	32	FEMALE	886	Dead	G3	Astrocytoma
TCGA-DB-A64V	54	MALE	889	Alive	G2	Oligodendroglioma
TCGA-HT-8113	49	FEMALE	900	Alive	G2	Oligodendroglioma
TCGA-S9-A6U2	48	FEMALE	908	Alive	G2	Oligodendroglioma
TCGA-DU-A5TR	51	MALE	908	Alive	G2	Oligoastrocytoma
TCGA-HT-7602	21	MALE	908	Alive	G2	Oligodendroglioma
TCGA-TQ-A7RP	66	MALE	914	Alive	G2	Oligoastrocytoma
TCGA-S9-A7R4	46	MALE	914	Alive	G3	Astrocytoma
TCGA-DB-A64P	40	MALE	916	Alive	G3	Oligodendroglioma
TCGA-DB-A4XB	38	MALE	919	Alive	G3	Astrocytoma
TCGA-DH-A669	70	MALE	919	Dead	G3	Oligodendroglioma
TCGA-TM-A84H	44	FEMALE	926	Alive	G3	Oligoastrocytoma
TCGA-RY-A847	45	MALE	933	Alive	G2	Oligodendroglioma
TCGA-DU-7018	57	FEMALE	933	Dead	G3	Oligodendroglioma
TCGA-DB-A75O	29	MALE	935	Alive	G3	Astrocytoma
TCGA-RY-A83X	46	FEMALE	939	Alive	G2	Oligodendroglioma
TCGA-S9-A6WL	52	MALE	946	Alive	G3	Astrocytoma
TCGA-TQ-A7RO	29	MALE	949	Alive	G2	Oligoastrocytoma
TCGA-TQ-A8XE	42	FEMALE	954	Dead	G2	Oligodendroglioma
TCGA-DB-A64R	24	FEMALE	955	Alive	G2	Oligodendroglioma
TCGA-HT-7902	30	FEMALE	956	Alive	G2	Oligoastrocytoma
TCGA-S9-A7R8	44	FEMALE	961	Dead	G3	Astrocytoma
TCGA-DB-A4XH	53	FEMALE	962	Alive	G2	Oligoastrocytoma
TCGA-HW-A5KJ	68	MALE	962	Dead	G3	Oligodendroglioma
TCGA-DU-A5TS	42	MALE	964	Alive	G2	Oligodendroglioma
TCGA-HT-7688	59	MALE	964	Alive	G3	Oligodendroglioma
TCGA-DH-5141	32	MALE	968	Alive	G3	Oligodendroglioma
TCGA-E1-A7Z6	41	FEMALE	984	Dead	G2	Astrocytoma
TCGA-E1-A7YV	26	FEMALE	987	Dead	G3	Oligoastrocytoma
TCGA-S9-A6U5	33	MALE	992	Alive	G2	Astrocytoma
TCGA-FG-8191	30	MALE	992	Alive	G3	Oligodendroglioma
TCGA-R8-A6MO	53	FEMALE	993	Alive	G2	Oligodendroglioma
TCGA-HT-8019	34	FEMALE	1004	Alive	G3	Oligodendroglioma
TCGA-TM-A84O	61	FEMALE	1011	Dead	G3	Oligodendroglioma
TCGA-DU-A5TP	33	MALE	1012	Alive	G3	Astrocytoma
TCGA-DB-A4XF	41	FEMALE	1021	Alive	G3	Astrocytoma
TCGA-TQ-A7RN	32	MALE	1026	Alive	G2	Oligodendroglioma
TCGA-TQ-A7RU	51	MALE	1032	Alive	G2	Oligodendroglioma
TCGA-DU-A5TY	46	FEMALE	1033	Dead	G3	Astrocytoma
TCGA-HT-8114	36	MALE	1040	Alive	G3	Oligoastrocytoma
TCGA-TM-A7CA	44	MALE	1058	Alive	G2	Astrocytoma
TCGA-S9-A6U6	28	MALE	1069	Alive	G3	Astrocytoma
TCGA-S9-A6TY	50	MALE	1076	Alive	G2	Oligodendroglioma
TCGA-HW-7495	45	FEMALE	1078	Alive	G2	Oligodendroglioma
TCGA-HT-7881	38	MALE	1079	Alive	G2	Oligodendroglioma
TCGA-S9-A7IQ	45	FEMALE	1099	Alive	G2	Oligoastrocytoma
TCGA-CS-4943	37	MALE	1106	Dead	G3	Astrocytoma
TCGA-DB-5280	43	MALE	1112	Alive	G2	Oligoastrocytoma
TCGA-FG-A710	50	FEMALE	1115	Alive	G2	Oligodendroglioma
TCGA-TQ-A7RM	41	FEMALE	1116	Alive	G3	Oligoastrocytoma
TCGA-S9-A6TZ	39	FEMALE	1120	Alive	G2	Astrocytoma
TCGA-E1-A7YW	28	MALE	1120	Dead	G2	Oligoastrocytoma
TCGA-FG-5965	39	FEMALE	1120	Dead	G2	Oligoastrocytoma
TCGA-VV-A829	44	MALE	1127	Alive	G3	Oligoastrocytoma
TCGA-HT-7874	41	FEMALE	1130	Alive	G3	Oligodendroglioma
TCGA-DU-A7TC	32	MALE	1137	Alive	G2	Astrocytoma
TCGA-CS-6290	31	MALE	1137	Dead	G3	Astrocytoma
TCGA-DB-A4XE	27	FEMALE	1139	Alive	G3	Oligoastrocytoma
TCGA-WY-A85D	60	MALE	1147	Alive	G2	Oligoastrocytoma
TCGA-HT-8018	40	FEMALE	1152	Dead	G2	Oligoastrocytoma
TCGA-FG-A4MT	27	FEMALE	1164	Alive	G2	Oligodendroglioma
TCGA-S9-A6WH	73	FEMALE	1173	Alive	G2	Oligoastrocytoma
TCGA-DU-A7TI	32	MALE	1183	Dead	G3	Astrocytoma
TCGA-HT-7856	35	MALE	1189	Alive	G3	Oligodendroglioma
TCGA-VM-A8CE	25	MALE	1191	Alive	G2	Oligodendroglioma
TCGA-EZ-7264	47	FEMALE	1201	Alive	G2	Oligodendroglioma
TCGA-HT-7854	62	MALE	1201	Alive	G2	Astrocytoma
TCGA-HW-8319	34	FEMALE	1209	Dead	G3	Astrocytoma
TCGA-DB-A4XD	32	MALE	1210	Alive	G3	Astrocytoma
TCGA-WY-A859	34	FEMALE	1213	Alive	G2	Astrocytoma
TCGA-HW-8320	36	MALE	1217	Alive	G3	Astrocytoma
TCGA-FG-7637	49	MALE	1219	Alive	G2	Oligoastrocytoma
TCGA-HT-7470	37	MALE	1220	Dead	G3	Oligodendroglioma
TCGA-CS-5393	39	MALE	1222	Alive	G3	Astrocytoma
TCGA-HT-7479	44	MALE	1227	Alive	G3	Astrocytoma
TCGA-TQ-A7RJ	25	FEMALE	1229	Alive	G2	Oligoastrocytoma
TCGA-TM-A84G	54	FEMALE	1236	Alive	G3	Oligodendroglioma
TCGA-TM-A84L	31	MALE	1242	Dead	G2	Oligoastrocytoma
TCGA-S9-A6TX	46	MALE	1245	Alive	G3	Oligodendroglioma
TCGA-S9-A6TW	40	MALE	1250	Alive	G3	Oligodendroglioma
TCGA-E1-5304	42	MALE	1251	Dead	G3	Astrocytoma
TCGA-FG-6691	23	FEMALE	1257	Alive	G2	Astrocytoma
TCGA-HW-7489	38	MALE	1262	Dead	G2	Oligoastrocytoma
TCGA-DU-7306	67	MALE	1277	Alive	G2	Oligoastrocytoma
TCGA-DH-A66B	52	MALE	1279	Alive	G3	Astrocytoma
TCGA-FG-6690	70	MALE	1294	Alive	G2	Oligodendroglioma
TCGA-HW-8321	31	MALE	1294	Alive	G3	Astrocytoma
TCGA-HT-7686	29	FEMALE	1300	Alive	G3	Astrocytoma
TCGA-IK-8125	62	MALE	1301	Alive	G3	Oligoastrocytoma
TCGA-VM-A8C9	37	FEMALE	1314	Alive	G2	Astrocytoma
TCGA-WY-A85A	20	MALE	1320	Alive	G2	Astrocytoma
TCGA-CS-4942	44	FEMALE	1335	Dead	G3	Astrocytoma
TCGA-WY-A858	32	FEMALE	1337	Alive	G3	Astrocytoma
TCGA-DU-7299	33	MALE	1339	Dead	G3	Astrocytoma
TCGA-TQ-A7RK	29	MALE	1341	Alive	G2	Oligoastrocytoma
TCGA-DU-A7TG	40	MALE	1351	Dead	G2	Oligodendroglioma
TCGA-DB-5279	59	MALE	1354	Alive	G2	Oligodendroglioma
TCGA-HT-7681	29	FEMALE	1359	Alive	G2	Oligoastrocytoma
TCGA-HW-7487	39	MALE	1382	Alive	G2	Oligodendroglioma
TCGA-HW-7490	41	MALE	1387	Alive	G2	Astrocytoma
TCGA-WY-A85B	24	MALE	1393	Alive	G2	Astrocytoma
TCGA-VM-A8C8	50	FEMALE	1397	Alive	G2	Oligodendroglioma
TCGA-HT-7609	34	MALE	1399	Alive	G3	Oligoastrocytoma
TCGA-DU-6397	45	MALE	1401	Dead	G3	Oligodendroglioma
TCGA-DH-5143	30	MALE	1401	Alive	G3	Oligoastrocytoma
TCGA-DB-A4X9	33	FEMALE	1412	Alive	G2	Oligoastrocytoma
TCGA-DB-A4XC	26	MALE	1421	Alive	G2	Oligoastrocytoma
TCGA-WY-A85C	36	MALE	1426	Alive	G2	Astrocytoma
TCGA-CS-6670	43	MALE	1426	Alive	G3	Oligodendroglioma
TCGA-CS-6666	22	MALE	1428	Alive	G3	Astrocytoma
TCGA-FG-5962	54	MALE	1453	Alive	G3	Oligodendroglioma
TCGA-DB-5275	36	MALE	1458	Alive	G3	Oligoastrocytoma
TCGA-CS-6667	39	FEMALE	1469	Alive	G2	Astrocytoma
TCGA-TM-A7C4	39	FEMALE	1470	Alive	G2	Astrocytoma
TCGA-FG-A711	33	FEMALE	1481	Dead	G2	Oligodendroglioma
TCGA-DU-6395	31	MALE	1491	Dead	G2	Oligoastrocytoma
TCGA-CS-6669	26	FEMALE	1494	Alive	G2	Oligodendroglioma
TCGA-TM-A7C5	30	MALE	1500	Alive	G2	Oligoastrocytoma
TCGA-CS-6668	57	FEMALE	1519	Alive	G2	Oligodendroglioma
TCGA-E1-5302	41	MALE	1525	Dead	G3	Astrocytoma
TCGA-HT-7858	28	MALE	1540	Alive	G2	Astrocytoma
TCGA-DB-5277	34	MALE	1547	Dead	G3	Astrocytoma
TCGA-W9-A837	47	MALE	1553	Alive	G2	Oligodendroglioma
TCGA-DU-A7TB	56	MALE	1567	Alive	G2	Oligodendroglioma
TCGA-CS-6665	51	FEMALE	1568	Alive	G3	Astrocytoma
TCGA-E1-A7YQ	58	FEMALE	1578	Dead	G3	Oligodendroglioma
TCGA-DU-6393	66	MALE	1585	Dead	G3	Oligodendroglioma
TCGA-FG-5964	62	MALE	1588	Alive	G2	Oligodendroglioma
TCGA-CS-5396	53	FEMALE	1631	Alive	G3	Oligodendroglioma
TCGA-DH-A7UR	59	FEMALE	1650	Alive	G3	Oligodendroglioma
TCGA-TM-A7C3	43	FEMALE	1666	Dead	G3	Astrocytoma
TCGA-HT-7610	25	FEMALE	1706	Alive	G2	Oligoastrocytoma
TCGA-HW-7486	37	MALE	1721	Alive	G2	Oligodendroglioma
TCGA-HT-7611	36	MALE	1752	Alive	G2	Oligoastrocytoma
TCGA-E1-5307	62	FEMALE	1762	Dead	G3	Astrocytoma
TCGA-TM-A84F	48	MALE	1796	Alive	G3	Astrocytoma
TCGA-R8-A73M	48	FEMALE	1806	Alive	G2	Oligodendroglioma
TCGA-CS-4944	50	MALE	1828	Alive	G2	Astrocytoma
TCGA-DU-7302	48	FEMALE	1834	Alive	G3	Oligodendroglioma
TCGA-TQ-A7RV	27	MALE	1868	Alive	G2	Astrocytoma
TCGA-DU-7300	53	FEMALE	1886	Dead	G3	Oligodendroglioma
TCGA-S9-A6TS	48	FEMALE	1891	Dead	G3	Astrocytoma
TCGA-DU-7007	33	MALE	1915	Dead	G2	Astrocytoma
TCGA-HT-8013	37	FEMALE	1933	Dead	G2	Oligoastrocytoma
TCGA-DH-5142	29	MALE	1943	Alive	G3	Astrocytoma
TCGA-TM-A7CF	41	FEMALE	1989	Alive	G2	Astrocytoma
TCGA-DU-6399	54	MALE	2000	Dead	G2	Oligodendroglioma
TCGA-E1-5303	38	MALE	2052	Dead	G3	Astrocytoma
TCGA-HW-7491	35	MALE	2078	Alive	G2	Oligodendroglioma
TCGA-HW-7493	40	FEMALE	2107	Alive	G2	Astrocytoma
TCGA-DB-5276	32	MALE	2218	Alive	G3	Oligoastrocytoma
TCGA-DB-A4XG	34	MALE	2219	Alive	G3	Oligodendroglioma
TCGA-E1-A7Z3	31	FEMALE	2235	Dead	G2	Astrocytoma
TCGA-E1-A7YO	45	MALE	2282	Dead	G3	Oligodendroglioma
TCGA-DU-6396	31	FEMALE	2286	Dead	G3	Oligoastrocytoma
TCGA-HT-7480	33	MALE	2287	Alive	G2	Oligodendroglioma
TCGA-S9-A6WD	58	MALE	2289	Alive	G3	Oligodendroglioma
TCGA-DB-5274	37	FEMALE	2289	Alive	G3	Oligoastrocytoma
TCGA-E1-5318	42	FEMALE	2379	Dead	G2	Oligodendroglioma
TCGA-DB-5281	61	MALE	2381	Alive	G3	Oligoastrocytoma
TCGA-E1-5305	34	MALE	2433	Dead	G3	Astrocytoma
TCGA-DB-5273	33	MALE	2493	Alive	G3	Astrocytoma
TCGA-DU-A7TA	32	MALE	2565	Alive	G2	Oligodendroglioma
TCGA-S9-A6WI	56	FEMALE	2585	Alive	G2	Oligoastrocytoma
TCGA-S9-A6WG	31	MALE	2602	Alive	G3	Astrocytoma
TCGA-S9-A6TU	38	MALE	2650	Alive	G2	Astrocytoma
TCGA-DU-6401	31	FEMALE	2660	Dead	G2	Oligodendroglioma
TCGA-R8-A6MK	40	MALE	2702	Alive	G2	Oligodendroglioma
TCGA-DU-7015	41	FEMALE	2761	Alive	G2	Oligodendroglioma
TCGA-DB-5278	17	MALE	2772	Alive	G2	Oligodendroglioma
TCGA-E1-A7YH	47	FEMALE	2835	Dead	G3	Astrocytoma
TCGA-R8-A6ML	52	MALE	2860	Alive	G3	Oligodendroglioma
TCGA-DU-7294	53	FEMALE	2869	Alive	G2	Oligodendroglioma
TCGA-DU-6407	35	FEMALE	2875	Dead	G2	Oligodendroglioma
TCGA-DU-A6S6	35	FEMALE	2893	Alive	G2	Oligoastrocytoma
TCGA-E1-5319	48	FEMALE	2907	Dead	G2	Oligodendroglioma
TCGA-HT-7481	39	MALE	2918	Alive	G2	Oligodendroglioma
TCGA-S9-A6U9	36	MALE	2918	Alive	G3	Astrocytoma
TCGA-S9-A6U8	24	MALE	2988	Dead	G2	Astrocytoma
TCGA-S9-A7R7	27	MALE	3000	Alive	G2	Astrocytoma
TCGA-S9-A7R3	28	FEMALE	3013	Alive	G2	Astrocytoma
TCGA-DU-7011	25	MALE	3200	Dead	G2	Oligoastrocytoma
TCGA-HT-7482	18	FEMALE	3253	Alive	G2	Oligoastrocytoma
TCGA-DU-6408	23	FEMALE	3470	Dead	G3	Oligodendroglioma
TCGA-DU-7014	59	MALE	3571	Dead	G2	Oligodendroglioma
TCGA-CS-4938	31	FEMALE	3574	Alive	G2	Astrocytoma
TCGA-HT-7604	50	MALE	3725	Alive	G2	Astrocytoma
TCGA-DB-5270	38	FEMALE	3733	Alive	G3	Oligoastrocytoma
TCGA-S9-A6UB	52	MALE	3761	Alive	G2	Oligodendroglioma
TCGA-E1-5322	38	FEMALE	3978	Dead	G2	Oligoastrocytoma
TCGA-DU-6404	24	FEMALE	4068	Dead	G3	Oligodendroglioma
TCGA-E1-5311	31	MALE	4084	Dead	G3	Oligodendroglioma
TCGA-S9-A6WE	34	MALE	4113	Alive	G2	Oligodendroglioma
TCGA-DU-A7T8	35	MALE	4229	Dead	G3	Oligoastrocytoma
TCGA-E1-A7Z4	35	MALE	4412	Dead	G2	Astrocytoma
TCGA-E1-A7YY	27	FEMALE	4445	Dead	G2	Oligodendroglioma
TCGA-DU-7009	32	FEMALE	4695	Dead	G2	Oligodendroglioma
TCGA-DU-7008	41	FEMALE	4752	Alive	G2	Oligodendroglioma
TCGA-S9-A7R1	35	MALE	5166	Dead	G2	Oligodendroglioma
TCGA-HT-7483	14	MALE	5255	Alive	G2	Oligoastrocytoma
TCGA-DU-5870	34	FEMALE	5546	Alive	G2	Oligodendroglioma
TCGA-DU-6392	35	FEMALE	6423	Alive	G3	Astrocytoma
