# Supplementary material for: Development of a Metabolic Subtype Classifier for Low- Grade Glioma to Guide Precision Therapy
Source: Research Square preprint supplement (doi:10.21203/rs.3.rs-7778086/v1), 2025-12-16
Supplement: Supplementary file 16 [file data2.xlsx]

## Sheet: Sheet1
ID	group	Gender
TCGA-FG-5963	1	1
TCGA-DU-6404	1	0
TCGA-HT-7469	1	1
TCGA-E1-A7YI	1	0
TCGA-TM-A84B	1	1
TCGA-TM-A7C3	1	0
TCGA-DU-7290	1	0
TCGA-E1-A7YL	1	1
TCGA-S9-A6U0	1	1
TCGA-DU-A5TY	1	0
TCGA-CS-6188	1	1
TCGA-DU-6405	1	0
TCGA-DU-6402	1	1
TCGA-DU-A7TD	1	1
TCGA-E1-A7YK	1	1
TCGA-DU-A76L	1	1
TCGA-E1-A7YJ	1	1
TCGA-DU-8158	1	0
TCGA-E1-A7YD	1	1
TCGA-S9-A7IX	1	1
TCGA-VM-A8CD	1	1
TCGA-CS-6186	1	1
TCGA-E1-A7YQ	1	0
TCGA-DU-7013	1	1
TCGA-DU-6406	1	0
TCGA-DU-7006	1	0
TCGA-DU-6403	1	0
TCGA-DU-5852	1	0
TCGA-FG-A4MW	1	1
TCGA-FG-6692	1	1
TCGA-E1-A7YM	1	1
TCGA-DU-8161	1	0
TCGA-E1-A7YN	1	0
TCGA-HW-A5KK	1	1
TCGA-HT-7882	1	1
TCGA-S9-A6UA	1	1
TCGA-VW-A8FI	1	1
TCGA-HT-A61C	1	1
TCGA-CS-4941	1	1
TCGA-S9-A7R2	1	1
TCGA-HT-A5RC	1	0
TCGA-DU-7012	1	0
TCGA-HT-7857	1	0
TCGA-HT-8563	1	0
TCGA-DU-5847	1	0
TCGA-S9-A6WN	1	0
TCGA-P5-A5EX	1	0
TCGA-QH-A6CS	1	1
TCGA-KT-A7W1	1	0
TCGA-S9-A6TV	1	1
TCGA-HT-8104	1	0
TCGA-QH-A6CV	1	1
TCGA-FG-A6J3	1	0
TCGA-FG-A70Z	1	0
TCGA-HT-A4DS	1	0
TCGA-DU-A7TJ	1	1
TCGA-HT-8011	1	1
TCGA-DU-5854	1	0
TCGA-HT-8110	1	1
TCGA-FG-A4MU	1	1
TCGA-FG-6688	1	0
TCGA-S9-A6WM	1	0
TCGA-HT-7860	1	0
TCGA-DU-8165	1	0
TCGA-FG-A87Q	1	0
TCGA-HT-A74H	1	1
TCGA-HT-A5RA	1	0
TCGA-S9-A89V	1	1
TCGA-DU-A5TT	1	1
TCGA-P5-A72U	1	0
TCGA-TM-A84C	1	1
TCGA-DU-7007	1	1
TCGA-CS-5395	1	1
TCGA-DB-A64O	1	1
TCGA-QH-A6CX	1	1
TCGA-P5-A5F6	1	1
TCGA-S9-A7R7	1	1
TCGA-HT-7691	1	0
TCGA-HT-7680	1	0
TCGA-VM-A8C9	1	0
TCGA-HT-A617	1	1
TCGA-HT-7854	1	1
TCGA-TQ-A7RP	1	1
TCGA-DU-6408	0	0
TCGA-E1-A7YV	0	0
TCGA-DH-A7UT	0	1
TCGA-CS-6290	0	1
TCGA-DU-6396	0	0
TCGA-E1-5311	0	1
TCGA-E1-A7YE	0	0
TCGA-DU-A7TI	0	1
TCGA-S9-A7IS	0	0
TCGA-DU-7299	0	1
TCGA-HW-8319	0	0
TCGA-DB-5277	0	1
TCGA-E1-5305	0	1
TCGA-DU-A7T8	0	1
TCGA-CS-4943	0	1
TCGA-HT-7470	0	1
TCGA-DU-7298	0	0
TCGA-DH-5140	0	0
TCGA-E1-5303	0	1
TCGA-E1-5302	0	1
TCGA-E1-A7YU	0	1
TCGA-E1-5304	0	1
TCGA-DU-7304	0	1
TCGA-S9-A7R8	0	0
TCGA-CS-4942	0	0
TCGA-DU-6397	0	1
TCGA-E1-A7YO	0	1
TCGA-E1-A7YH	0	0
TCGA-S9-A6TS	0	0
TCGA-DU-A76R	0	1
TCGA-DU-6394	0	1
TCGA-DU-7300	0	0
TCGA-CS-5397	0	0
TCGA-DU-7018	0	0
TCGA-DU-7010	0	0
TCGA-DU-8162	0	0
TCGA-TM-A84O	0	0
TCGA-E1-5307	0	0
TCGA-DB-A64W	0	0
TCGA-DU-6393	0	1
TCGA-HW-A5KJ	0	1
TCGA-DU-7292	0	1
TCGA-DH-A669	0	1
TCGA-E1-A7YS	0	1
TCGA-DU-A7T6	0	0
TCGA-HT-7616	0	1
TCGA-P5-A72X	0	1
TCGA-P5-A730	0	1
TCGA-HT-A61B	0	1
TCGA-S9-A6U1	0	0
TCGA-CS-6666	0	1
TCGA-FG-8181	0	1
TCGA-S9-A7J2	0	1
TCGA-DU-6542	0	1
TCGA-FN-7833	0	1
TCGA-KT-A74X	0	1
TCGA-DU-A6S7	0	0
TCGA-TQ-A7RF	0	0
TCGA-DB-A4XE	0	0
TCGA-QH-A65X	0	0
TCGA-S9-A6U6	0	1
TCGA-HT-7690	0	1
TCGA-DU-8163	0	1
TCGA-DB-A75O	0	1
TCGA-HT-7686	0	0
TCGA-DH-5142	0	1
TCGA-RY-A843	0	1
TCGA-HT-7601	0	0
TCGA-HT-7468	0	1
TCGA-S9-A7J0	0	0
TCGA-TM-A84I	0	1
TCGA-FG-8191	0	1
TCGA-DH-5143	0	1
TCGA-HT-7879	0	1
TCGA-FG-7638	0	0
TCGA-HW-8321	0	1
TCGA-S9-A6WG	0	1
TCGA-HT-8111	0	1
TCGA-DH-5141	0	1
TCGA-DB-A4XD	0	1
TCGA-WY-A858	0	0
TCGA-VM-A8CB	0	1
TCGA-HT-A5R7	0	0
TCGA-DU-A5TW	0	0
TCGA-DU-A5TP	0	1
TCGA-DB-5273	0	1
TCGA-HT-A74O	0	1
TCGA-P5-A781	0	0
TCGA-HT-8019	0	0
TCGA-HT-7609	0	1
TCGA-DB-A4XG	0	1
TCGA-P5-A5F4	0	0
TCGA-P5-A72W	0	1
TCGA-VW-A7QS	0	0
TCGA-HT-7856	0	1
TCGA-DU-6392	0	0
TCGA-DB-A75L	0	0
TCGA-TM-A84S	0	1
TCGA-VV-A86M	0	0
TCGA-S9-A7QX	0	0
TCGA-HT-8114	0	1
TCGA-HW-8320	0	1
TCGA-DB-5275	0	1
TCGA-S9-A6U9	0	1
TCGA-HT-7471	0	0
TCGA-FG-8185	0	1
TCGA-HT-A618	0	0
TCGA-FG-A87N	0	0
TCGA-P5-A77W	0	0
TCGA-DB-5274	0	0
TCGA-QH-A870	0	0
TCGA-QH-A6CY	0	1
TCGA-QH-A65R	0	0
TCGA-DB-A4XB	0	1
TCGA-DB-5270	0	0
TCGA-P5-A5EZ	0	1
TCGA-HT-7855	0	1
TCGA-S9-A7IY	0	1
TCGA-CS-5393	0	1
TCGA-CS-5394	0	1
TCGA-HT-7620	0	1
TCGA-S9-A89Z	0	1
TCGA-TM-A84M	0	1
TCGA-DB-A64P	0	1
TCGA-S9-A6TW	0	1
TCGA-DU-7309	0	0
TCGA-DB-A4XF	0	0
TCGA-TQ-A7RM	0	0
TCGA-HT-7874	0	0
TCGA-FG-8186	0	0
TCGA-S9-A6WP	0	1
TCGA-QH-A6CW	0	1
TCGA-DH-A7UU	0	1
TCGA-DH-A66D	0	0
TCGA-CS-6670	0	1
TCGA-P5-A780	0	0
TCGA-P5-A736	0	0
TCGA-VM-A8CF	0	0
TCGA-TM-A84H	0	0
TCGA-VV-A829	0	1
TCGA-HT-7479	0	1
TCGA-S9-A7R4	0	1
TCGA-S9-A6TX	0	1
TCGA-QH-A6X4	0	1
TCGA-HT-8564	0	1
TCGA-RY-A840	0	1
TCGA-HT-A5R9	0	0
TCGA-QH-A6XC	0	1
TCGA-FG-7636	0	1
TCGA-S9-A7IZ	0	0
TCGA-TM-A84F	0	1
TCGA-DU-7302	0	0
TCGA-DU-5855	0	0
TCGA-DH-A66G	0	0
TCGA-DH-A7UV	0	1
TCGA-HT-A619	0	0
TCGA-HT-A4DV	0	0
TCGA-QH-A6CU	0	0
TCGA-S9-A7J3	0	0
TCGA-S9-A6WL	0	1
TCGA-DH-A66B	0	1
TCGA-R8-A6ML	0	1
TCGA-HT-7677	0	1
TCGA-CS-5396	0	0
TCGA-HT-8105	0	1
TCGA-RY-A83Z	0	0
TCGA-S9-A7QW	0	0
TCGA-TM-A84G	0	0
TCGA-FG-5962	0	1
TCGA-DB-A75K	0	0
TCGA-DU-8168	0	0
TCGA-DU-6410	0	1
TCGA-QH-A6X8	0	0
TCGA-DB-A64X	0	0
TCGA-DH-5144	0	0
TCGA-HT-7684	0	1
TCGA-HT-A74K	0	0
TCGA-S9-A6WD	0	1
TCGA-HT-7688	0	1
TCGA-DH-A7UR	0	0
TCGA-HT-7694	0	1
TCGA-DB-5281	0	1
TCGA-HT-7477	0	1
TCGA-IK-8125	0	1
TCGA-TM-A84J	0	1
TCGA-HT-8109	0	1
TCGA-P5-A72Z	0	0
TCGA-HT-7475	0	1
TCGA-HT-7687	0	1
TCGA-DU-A6S8	0	0
TCGA-S9-A6U8	0	1
TCGA-DU-7011	0	1
TCGA-E1-A7YY	0	0
TCGA-E1-A7YW	0	1
TCGA-TM-A84L	0	1
TCGA-DU-6395	0	1
TCGA-E1-A7Z3	0	0
TCGA-DU-6401	0	0
TCGA-TQ-A7RW	0	1
TCGA-DU-7009	0	0
TCGA-FG-A711	0	0
TCGA-DU-6407	0	0
TCGA-E1-A7Z4	0	1
TCGA-S9-A7R1	0	1
TCGA-HT-8013	0	0
TCGA-HW-7489	0	1
TCGA-E1-5322	0	0
TCGA-FG-5965	0	0
TCGA-HT-8018	0	0
TCGA-DU-A7TG	0	1
TCGA-E1-A7Z6	0	0
TCGA-TQ-A8XE	0	0
TCGA-E1-5318	0	0
TCGA-IK-7675	0	1
TCGA-E1-5319	0	0
TCGA-DU-7301	0	1
TCGA-DU-6399	0	1
TCGA-E1-A7Z2	0	0
TCGA-DU-7014	0	1
TCGA-HT-7607	0	0
TCGA-DU-6400	0	0
TCGA-DU-A76K	0	1
TCGA-HT-7483	0	1
TCGA-DB-5278	0	1
TCGA-HT-7482	0	0
TCGA-TM-A84T	0	1
TCGA-HT-7877	0	0
TCGA-HT-A61A	0	0
TCGA-P5-A5EW	0	0
TCGA-DB-A64S	0	1
TCGA-FG-A70Y	0	0
TCGA-WY-A85A	0	1
TCGA-HT-8015	0	1
TCGA-P5-A5EY	0	1
TCGA-HT-7602	0	1
TCGA-HT-A74L	0	0
TCGA-QH-A6XA	0	0
TCGA-FG-6691	0	0
TCGA-HT-A5RB	0	1
TCGA-VM-A8CH	0	0
TCGA-DB-A64R	0	0
TCGA-WY-A85B	0	1
TCGA-DB-A75P	0	0
TCGA-VM-A8CE	0	1
TCGA-TQ-A7RJ	0	0
TCGA-HT-7610	0	0
TCGA-HT-7676	0	1
TCGA-HT-8108	0	0
TCGA-HT-7476	0	1
TCGA-DB-A4XC	0	1
TCGA-CS-6669	0	0
TCGA-QH-A6X3	0	1
TCGA-FG-A4MT	0	0
TCGA-TQ-A7RV	0	1
TCGA-FG-7634	0	1
TCGA-HT-7473	0	1
TCGA-HT-7858	0	1
TCGA-S9-A7R3	0	0
TCGA-DU-5853	0	1
TCGA-HT-8558	0	0
TCGA-HT-7695	0	0
TCGA-DU-8166	0	0
TCGA-S9-A6WO	0	1
TCGA-HT-7603	0	1
TCGA-HT-7873	0	1
TCGA-TQ-A7RO	0	1
TCGA-TQ-A7RK	0	1
TCGA-HT-7681	0	0
TCGA-HT-7880	0	1
TCGA-P5-A5F1	0	1
TCGA-HT-8012	0	0
TCGA-FG-6689	0	1
TCGA-DU-A76O	0	1
TCGA-HT-7606	0	0
TCGA-DB-A4XA	0	1
TCGA-HT-7902	0	0
TCGA-TM-A7C5	0	1
TCGA-DB-A64Q	0	0
TCGA-FG-8187	0	1
TCGA-FG-7641	0	1
TCGA-TM-A84Q	0	1
TCGA-CS-4938	0	0
TCGA-QH-A65S	0	0
TCGA-TQ-A7RN	0	1
TCGA-DU-A7TC	0	1
TCGA-DU-A7TA	0	1
TCGA-HT-A5R5	0	0
TCGA-P5-A5F0	0	1
TCGA-HT-A74J	0	1
TCGA-QH-A86X	0	1
TCGA-FG-8189	0	0
TCGA-S9-A6U5	0	1
TCGA-DB-A4X9	0	0
TCGA-HT-7480	0	1
TCGA-F6-A8O3	0	1
TCGA-FG-A60K	0	0
TCGA-FG-A60L	0	0
TCGA-WY-A859	0	0
TCGA-S9-A6WE	0	1
TCGA-DU-5870	0	0
TCGA-FG-8182	0	1
TCGA-HW-A5KM	0	1
TCGA-S9-A7QY	0	0
TCGA-HW-7491	0	1
TCGA-DU-A6S6	0	0
TCGA-HT-A616	0	0
TCGA-HT-7478	0	1
TCGA-P5-A5F2	0	0
TCGA-TQ-A7RG	0	1
TCGA-WY-A85C	0	1
TCGA-HT-7611	0	1
TCGA-TQ-A7RI	0	0
TCGA-DU-5871	0	0
TCGA-DU-A6S2	0	0
TCGA-HW-7486	0	1
TCGA-HT-7472	0	1
TCGA-HT-7605	0	1
TCGA-QH-A6CZ	0	1
TCGA-P5-A735	0	0
TCGA-HT-A615	0	0
TCGA-TQ-A7RR	0	1
TCGA-TQ-A7RQ	0	0
TCGA-DB-A64U	0	0
TCGA-HT-7881	0	1
TCGA-S9-A6TU	0	1
TCGA-P5-A5EV	0	1
TCGA-TQ-A7RH	0	1
TCGA-HW-8322	0	1
TCGA-S9-A6TZ	0	0
TCGA-HW-7487	0	1
TCGA-CS-6667	0	0
TCGA-TM-A7C4	0	0
TCGA-HT-7481	0	1
TCGA-RY-A845	0	0
TCGA-HW-7493	0	0
TCGA-R8-A6MK	0	1
TCGA-FG-8188	0	1
TCGA-S9-A7QZ	0	1
TCGA-HW-7490	0	1
TCGA-TM-A7CF	0	0
TCGA-DU-7015	0	0
TCGA-DU-7008	0	0
TCGA-HT-7485	0	1
TCGA-HW-A5KL	0	0
TCGA-DU-A5TS	0	1
TCGA-HT-7692	0	1
TCGA-S9-A7J1	0	1
TCGA-QH-A65V	0	0
TCGA-DU-5872	0	0
TCGA-DB-5280	0	1
TCGA-F6-A8O4	0	1
TCGA-HT-7884	0	0
TCGA-FG-A6J1	0	0
TCGA-FG-A4MY	0	0
TCGA-TM-A7CA	0	1
TCGA-RY-A83Y	0	1
TCGA-RY-A847	0	1
TCGA-HW-7495	0	0
TCGA-S9-A7IQ	0	0
TCGA-TM-A84R	0	1
TCGA-RY-A83X	0	0
TCGA-HT-A614	0	1
TCGA-P5-A737	0	1
TCGA-FG-A60J	0	0
TCGA-DB-A75M	0	1
TCGA-FG-A4MX	0	1
TCGA-EZ-7264	0	0
TCGA-W9-A837	0	1
TCGA-DU-5849	0	1
TCGA-WY-A85E	0	0
TCGA-S9-A6U2	0	0
TCGA-R8-A73M	0	0
TCGA-DH-A66F	0	1
TCGA-FG-7643	0	0
TCGA-HT-8113	0	0
TCGA-FG-7637	0	1
TCGA-DH-A7US	0	1
TCGA-S9-A6TY	0	1
TCGA-FG-A710	0	0
TCGA-VM-A8C8	0	0
TCGA-CS-4944	0	1
TCGA-HT-7604	0	1
TCGA-HT-7693	0	0
TCGA-DU-8164	0	1
TCGA-DU-A5TR	0	1
TCGA-HT-7474	0	1
TCGA-P5-A733	0	0
TCGA-S9-A6UB	0	1
TCGA-DB-A4XH	0	0
TCGA-R8-A6MO	0	0
TCGA-DU-7294	0	0
TCGA-HT-7467	0	1
TCGA-VM-A8CA	0	1
TCGA-QH-A65Z	0	1
TCGA-DB-A64V	0	1
TCGA-P5-A77X	0	0
TCGA-HT-7875	0	1
TCGA-DU-A7TB	0	1
TCGA-S9-A6WI	0	0
TCGA-S9-A6WQ	0	0
TCGA-CS-6668	0	0
TCGA-HT-7689	0	0
TCGA-QH-A6X5	0	0
TCGA-P5-A731	0	0
TCGA-DB-5279	0	1
TCGA-FG-A6IZ	0	1
TCGA-DU-A6S3	0	1
TCGA-WY-A85D	0	1
TCGA-HT-7608	0	1
TCGA-HT-8107	0	1
TCGA-DU-5874	0	0
TCGA-DU-A5TU	0	0
TCGA-FG-5964	0	1
TCGA-HT-8010	0	0
TCGA-WH-A86K	0	1
TCGA-DB-A64L	0	0
TCGA-DU-7306	0	1
TCGA-DU-8167	0	0
TCGA-FG-6690	0	1
TCGA-QH-A6X9	0	0
TCGA-S9-A6WH	0	0
TCGA-FG-A713	0	0
TCGA-DU-7019	0	1
