# Supplementary material for: Development of a Metabolic Subtype Classifier for Low- Grade Glioma to Guide Precision Therapy
Source: Research Square preprint supplement (doi:10.21203/rs.3.rs-7778086/v1), 2025-12-16
Supplement: Supplementary file 18 [file geneCoef.xls]

Gene	Coef
(Intercept)	-2.27899105175285
GALNT3	0.193144563525135
NKX2-5	0.0573793239717537
SOD2	0.00522406136007796
FXYD6	-0.565104487745744
TRPM8	0.180917862665155
MCUB	0.34296405015053
MAP3K20	0.200195500030659
SLC66A3	0.101362583620803
TAGLN2	0.0219265398828658
ARL4C	0.140298195822802
GDAP1L1	-0.154146450669572
RBPMS	0.199603005129458
H2BC9	0.535628612479261
NECAB2	-0.0350564167121162
ABCC3	0.192335967872564
MAP3K6	0.0878431563013607
SLIT1	-0.0261602436676321
GLMP	0.45228063433595
PODNL1	0.0521845046297004
CNTN3	-0.367902140921143
SHISAL2A	0.856866058002545
F2RL2	6.40494839554774e-05
HOXA2	0.143108026200733
AK4	0.0527022372952868
ALDH3A1	0.503565737664008
FREM3	-0.042018153451702
TAX1BP3	0.221807977094632
LTF	0.0294568952768299
APLN	0.114512340198251
PAK5	-0.207323223067161
BEX1	-0.628170504901252
SLC47A2	0.0637727745401005
PDLIM3	0.0971961669165862
SH3GL2	-0.00534553155075105
GRIA4	-0.178014562011684
TREM1	0.0113064243173428
RBP1	0.141346830044249
TENT5A	0.562692691247456
MAP2K3	0.0682652070000449
CRYBG1	0.101967938439883
SNAP91	-0.0726859303838774
CNPY1	0.280623566083373
