# Supplementary material for: Development of a Metabolic Subtype Classifier for Low- Grade Glioma to Guide Precision Therapy
Source: Research Square preprint supplement (doi:10.21203/rs.3.rs-7778086/v1), 2025-12-16
Supplement: Supplementary file 20 [file rfGenes.xls]

Gene	importance
C9orf64	5.91524664512545
PRICKLE3	4.42099843915306
RAB34	4.22679744728621
EMP3	4.13846366644061
CHI3L1	4.10576194400904
SNAP91	3.78206749728077
JPH4	3.77011228652942
FUCA2	3.54606642938299
DNAJC12	3.35625826488456
HSPB6	3.25494456832795
STEAP3	2.98840200795029
GLRA3	2.32654120768554
MCUB	2.25510143065706
AEBP1	2.24786143293867
PDPN	2.23599376896033
EFEMP2	2.21212381042291
CAVIN1	2.19346090677191
TUBA1C	2.17335005752399
RIPPLY2	2.14224706664135
TAGLN2	2.07850889496537
LATS2	1.96289263718526
TMBIM1	1.93683597820976
NSUN7	1.92916888481355
SERPINA5	1.92727361452396
RBP1	1.92091767895325
GGACT	1.85720092879584
GLMP	1.84886992678446
SLC2A4RG	1.78240754679111
GSAP	1.71135531135531
ARSD	1.69563155481144
ANXA5	1.64657156164003
STAC	1.57024839775216
GALM	1.55827080037538
GSDMD	1.47104530820808
CRTAC1	1.43322851508262
CD151	1.41584452392199
METTL7B	1.37923402491775
TNFRSF14	1.33622107360052
SLC1A6	1.00547001793865
FAM163B	0.7308604033355
C1S	0.629426644975591
MAP2K3	0.627672755058836
SLC12A7	0.618077227245253
PDLIM3	0.608367333883225
MYL12A	0.601828783461437
CLGN	0.573958900762824
KDELR3	0.56704048165536
TLCD3B	0.542710461012228
GDAP1L1	0.506693176082785
TNK2	0.505427097310106
GIMAP2	0.503814768898214
CHRM1	0.478405315614618
MX1	0.457233560090703
VSTM2A	0.446149585924774
BCL3	0.433642810252415
CD58	0.427991006798272
MAPK8IP2	0.420639774998016
UPP1	0.413720865553284
FAM110B	0.396475291147387
SLIT1	0.39115299469728
PPM1L	0.38777669798078
ATP1A3	0.368142192376234
THNSL2	0.362739535071099
TMCO4	0.358268345994207
NXPH1	0.357265655602662
PLA2G5	0.353265424156939
EYA4	0.348941152951879
DYRK3	0.346781789638932
TBC1D1	0.345425692881131
SCRT1	0.337374109259714
PDGFA	0.336403766676785
STX1B	0.335870216954541
ELOVL2	0.335253588575713
DCTD	0.329869149801822
CDK5R2	0.326359211097653
CACNG2	0.317984905404948
DUSP26	0.310509840834647
CD248	0.309354480181648
TTC26	0.306462005944616
RBPMS	0.305957999638211
SLC15A3	0.305558669250833
RAB33A	0.304240749497597
CLIC1	0.296223996845115
TMEM51	0.287734821569407
TMSB4X	0.28198066319121
CASP6	0.278103755654776
DUSP9	0.27803698934597
GRIA2	0.276085336726068
OPLAH	0.275726304906938
KCNIP2	0.274202488641813
MACROH2A2	0.271138472395761
FAM111A	0.270099602024305
DISP3	0.259026687598116
ELFN2	0.255681818181818
RTN1	0.248546691403834
MPPED1	0.247104247104247
SERPING1	0.245429925524712
LSP1	0.241711762952587
CLIC4	0.239349823907982
ACSS3	0.237714926593519
TOX3	0.236224545112189
ASIC1	0.235819057767908
S100A4	0.233332535143239
RRBP1	0.232411067193676
TMEM220	0.230901698231299
TTC12	0.228485044811575
IQGAP1	0.214153342310659
ADAM12	0.212536443148688
KDELR1	0.211640211640212
CCDC40	0.207135204548254
PALLD	0.205336590141259
GABRG1	0.205260532779623
DBNDD1	0.204081632653061
FAXC	0.203169072507052
SHISA7	0.20283203210265
CKMT1A	0.202375526469342
CKMT1B	0.2
TNC	0.19966056360834
CYB5R1	0.19863060106643
FKBP9	0.197424684159377
C5orf49	0.197259079160833
ARHGDIG	0.197137879542061
CHRNA4	0.196835255841467
LITAF	0.194805194805195
CTSS	0.18880167451596
S100A8	0.188342774352383
SPTBN2	0.184282668291197
CUX2	0.183673469387755
APOL1	0.18158535704404
CISH	0.179093499343992
CLCF1	0.170120253644555
GALNT9	0.166593655575233
CLVS2	0.161714091812497
MT1M	0.160955864825714
TMEM154	0.160859441965432
FBLN1	0.160853518673847
CNRIP1	0.159485232173256
SGSM1	0.155102040816326
ZNF804A	0.153218210361068
EPHA2	0.153061224489796
GAPT	0.153061224489796
FAM221A	0.152899254940071
CCDC152	0.152110533654456
FKBP5	0.151351386294144
SUSD2	0.148091970319657
HSPB1	0.148001700680272
BEX1	0.14746048795458
HLAafafDQB1	0.14405762304922
SULF1	0.142462782214335
DRAXIN	0.141909232222866
TMCC2	0.141102594884108
MAP1LC3C	0.140350877192983
PRSS35	0.140156204661959
LINC00634	0.132576338806199
FCGR2B	0.132167152575316
MYT1	0.132167152575316
KCNQ5	0.131195335276968
SMIM3	0.127431496537187
PSD	0.123276819323647
ABCC3	0.121947974500218
FGFRL1	0.121745159817824
SFRP4	0.120995411996073
LGR5	0.120934277762856
EGFR	0.120926745740379
HPD	0.120911454716102
FAM166C	0.120415794089289
FSTL1	0.120381464761934
PLEKHA4	0.119047619047619
S100A3	0.117125110913931
CACNA1B	0.116326530612245
SERPINE1	0.115001480678718
S100A9	0.114308390022676
CTF1	0.111953352769679
MARVELD1	0.111866671357327
PALM3	0.111317254174397
NRSN1	0.110685370038426
IQSEC3	0.108909086548838
MBNL3	0.104956268221574
VIM	0.103114930182599
LGALS3BP	0.102040816326531
ASIC4	0.0991058630810183
GDF15	0.0979591836734694
FPR1	0.0979591836734694
GAD1	0.0962099125364431
CAMSAP3	0.09258070965912
CA3	0.0918367346938776
BTN2A2	0.0909641766445301
FKBP10	0.0870748299319728
AMER3	0.0868045848476378
SQOR	0.0832478881819702
SLC49A3	0.0812448494837366
STK40	0.0812420662044722
RAB42	0.0812265204589301
SLC25A24	0.0808683941960859
ARHGAP44	0.0808328257411334
RAB27B	0.0808288881567359
RBMS1	0.0805135563260262
PLAAT4	0.0804765766753792
ADAM33	0.0804683322406195
ITGAL	0.0803470197602851
MCC	0.0801589167135392
NPC2	0.0801420986606596
VAV3	0.0795660036166365
BRINP1	0.0793961420184513
ZDHHC1	0.0793961420184513
TNFRSF12A	0.0793650793650793
IFI44	0.0790411402656301
MEIS1	0.0787648392690409
ADA2	0.0786092214663644
PIANP	0.0784313725490196
ACADS	0.0775641025641026
RARRES1	0.0774601338511114
FAM110C	0.0771753810534442
EMILIN2	0.076530612244898
GABRG2	0.076530612244898
FAM155A	0.0734693877551021
SOX1	0.0726345083487941
TYMP	0.0720288115246098
IER5L	0.0720197301874153
GABRD	0.0707482993197279
BUB1	0.0699708454810496
HLAafafDPB1	0.0699708454810496
BTBD19	0.0667903525046382
ROR1	0.0667903525046382
CACNA1E	0.0634920634920635
TSPO	0.0612244897959184
NECTIN1	0.0583090379008746
GALNT14	0.054421768707483
PLIN2	0.0489795918367347
HGF	0.0489795918367347
IGFBP5	0.0407444668008049
SHISAL2A	0.0407222796952877
PCLAF	0.0407222796952877
TMEM155	0.0407218442932731
CENPA	0.0407202881152462
PYGL	0.0407191448007777
HLAafafDRB1	0.0407191448007777
BCAT1	0.0407186798164248
SSTR2	0.0407182103610678
BTN3A2	0.0407179739365628
SYNC	0.0407179739365628
F2RL2	0.0407177363699099
TEAD2	0.0407170167337004
CD101	0.0407157937066454
COL14A1	0.0407152960193977
METTL1	0.0407150453233408
ALOX15B	0.0407145401801623
ATCAY	0.0407145401801623
RAB27A	0.0407140299728917
ADGRV1	0.0407140299728917
DNAAF3	0.0407137729463643
SLC66A3	0.0407129940583823
CAV2	0.0405350508231269
ALPK1	0.0405257046829589
CHRNA9	0.0405243185762499
FXYD5	0.0405236205528305
C7orf57	0.0405229191842757
ITGB4	0.0405222144464827
PAK5	0.0405193613126634
HOXA2	0.0405179138862891
RAB32	0.0403290296188012
CBLN2	0.040324563560364
TLR3	0.0402996641694653
GABRB3	0.0402930402930404
SMOC1	0.0402862443678771
SHISAL1	0.0402647545504687
CCN4	0.0402494331065761
FBXO17	0.0402414486921528
SRRM3	0.0402414486921528
CXCR4	0.0402160864345738
CEP112	0.0402160864345738
FEZF1	0.0402071276271704
CYP4F11	0.0401579986833443
CACNA2D1	0.0401360544217687
RAB36	0.0401002506265664
SYN1	0.0400313971742543
PDCD1LG2	0.0393586005830903
NEGR1	0.0391910277624564
TMEM196	0.0391691663707318
PLBD1	0.039041703637977
LPIN3	0.0390245650499003
CGREF1	0.038961038961039
OSBPL3	0.0386680988184748
TPX2	0.0384153661464586
EEF1AKMT3	0.0374149659863946
CAV1	0.0371057513914657
COL8A1	0.036734693877551
ATP6V1G2	0.036734693877551
DMRTA2	0.036281179138322
DYNLT3	0.036281179138322
CBR1	0.036281179138322
HMX1	0.0349854227405248
SLC27A3	0.0349854227405248
RIN1	0.0349854227405248
GPSM3	0.0349854227405248
SLFN12	0.0340136054421769
KCNH8	0.0340136054421769
CFAP77	0.0340136054421769
FCHSD1	0.0340136054421769
PDLIM4	0.0326530612244898
SLITRK1	0.0326530612244898
CFAP45	0.0326530612244898
ALCAM	0.0306122448979592
TOX	0.0306122448979592
KIF23	0.0306122448979592
NMNAT3	0.0306122448979592
SLC16A4	0.0306122448979592
IFIH1	0.0272108843537415
ELK3	0.0272108843537415
PNMA5	0.0204081632653061
NIBAN1	0.0204081632653061
DLGAP3	0.0204081632653061
RAP2A	0.0203105165511186
PLCB1	0.0203102823863356
CSTA	0.0203083678459163
RGS22	0.0101098175990949
PNCK	0
ANKRD45	0
B3GNT5	0
CD44	0
MMP2	0
HPSE2	0
PLCE1	0
RYR3	0
AMER2	0
BCL2L12	0
ITGA5	0
TMEM130	0
RNF135	0
WASF1	0
VAMP8	0
STOX1	0
AEN	0
FGL2	0
CXCL14	0
SEC24D	0
CYBA	0
RGMB	0
TMSB10	0
TGFB2	0
PLAU	0
MDFIC	0
GALNT3	0
WNK2	0
LILRA4	0
LAMA2	0
ARSF	0
ANXA1	0
C1R	0
SUSD5	0
C1RL	0
COL22A1	0
NAP1L2	0
GNAL	0
MEX3B	0
NKX2afaf5	0
TC2N	0
RDH10	0
RBFOX3	0
C1QC	0
IGF2BP3	0
HOXD11	0
FNBP1L	0
RGN	0
LGR6	0
CCNB1	0
SP140L	0
SOD2	0
KCNK3	0
FHL3	0
PHLDA3	0
FXYD6	0
IRF1	0
FABP7	0
AGR3	0
HLAafafDRB5	0
FPR3	0
UNC5A	0
SOX4	0
CAPS	0
HOXA1	0
PRAM1	0
MSN	0
PPCS	0
ALPK3	0
PRR29	0
EVC	0
RAB3C	0
ALOX5	0
PCOLCE	0
FRY	0
PLEK	0
TRIM22	0
RNASE6	0
SYN3	0
GPR3	0
MDGA2	0
GJA1	0
CSF3R	0
HES5	0
SERPINF1	0
LHFPL2	0
VEPH1	0
SHC1	0
GPNMB	0
KCNIP3	0
TRPM8	0
BCAN	0
KIAA1522	0
IRX5	0
CMPK2	0
ITGA3	0
RGS16	0
TCIM	0
LRFN5	0
GPX7	0
LIMS2	0
BASP1	0
PNPLA4	0
PRKCB	0
BSN	0
HCST	0
C5AR1	0
CGAS	0
DNAJC22	0
ARPP21	0
APOBR	0
PHACTR3	0
SIGLEC9	0
MXRA8	0
TLR1	0
RGS3	0
LRGUK	0
CPNE5	0
ZIC2	0
NFATC1	0
MAP3K20	0
DSCAML1	0
RAC2	0
COL1A1	0
B3GNT9	0
GAREM2	0
HES1	0
ASB13	0
CCDC92B	0
ALDOC	0
TEKT1	0
PLK3	0
SEL1L3	0
ATF3	0
SRRM4	0
TRAF5	0
APCDD1L	0
RHOC	0
BIRC5	0
APOL6	0
CST7	0
SELL	0
GASK1A	0
SLC2A13	0
PLP2	0
H2AW	0
RTN4R	0
GALNT13	0
TAFA2	0
FOXJ1	0
NKD1	0
PGAP4	0
DPP4	0
SPATA17	0
CNPY4	0
CNGA3	0
CFAP61	0
MAGEE1	0
LAIR1	0
SNTG1	0
ANKRD35	0
PLTP	0
TMEM159	0
IL17RC	0
PLA2G2A	0
FOXM1	0
C5orf38	0
LGALS1	0
CABP1	0
PABPC5	0
RASGRF1	0
HLAafafE	0
EVC2	0
GASK1B	0
ST8SIA4	0
FRRS1L	0
CFAP73	0
GMPR	0
C6orf15	0
C3	0
FAS	0
SWAP70	0
LILRB4	0
SYT13	0
BTBD17	0
FPGT	0
SIPA1	0
OSMR	0
B3GNT7	0
SEMA3A	0
SOD3	0
GDF10	0
OPHN1	0
TFCP2L1	0
FABP5	0
SEMA3E	0
CLEC2B	0
REST	0
ATOH8	0
TMEM255A	0
SLC8A3	0
CRYAB	0
DTX3L	0
HS2ST1	0
PIRT	0
SCIN	0
VAX2	0
DBX2	0
ARFGEF3	0
MUC1	0
CPEB3	0
TRBV28	0
PCDH7	0
FZD2	0
TEAD3	0
C3AR1	0
GNG5	0
TNFRSF11B	0
SAMSN1	0
CADM2	0
DUSP5	0
PRKG2	0
EMILIN1	0
CPLX1	0
RAB3A	0
C1QL1	0
TTYH3	0
SLC22A6	0
NCF2	0
TMEM151B	0
COPZ2	0
C14orf132	0
ADAM19	0
HLAafafDRA	0
PRPS2	0
GCK	0
ASF1B	0
APOL4	0
EN1	0
NDST4	0
SLC4A3	0
RSPH4A	0
GALNT5	0
RNASE2	0
NTNG2	0
ADCY5	0
TACR1	0
HVCN1	0
HOXB3	0
GRIK2	0
RHBDF1	0
LTBP1	0
SMAD9	0
AC010255.2	0
CHST6	0
MT3	0
DPYD	0
MYO5C	0
LIF	0
BACE2	0
OXTR	0
CASP8	0
SDC2	0
TAP1	0
LRRC4	0
CFH	0
PINLYP	0
IGFBP7	0
ECRG4	0
AFAP1L1	0
CCDC102A	0
FGFR3	0
FOLR1	0
FERMT3	0
FLNC	0
CLSTN2	0
LRRTM3	0
TCF12	0
LGI4	0
ARL4C	0
ADGRL2	0
GNG12	0
FGF1	0
CDC6	0
CST3	0
CHRNB2	0
DSG2	0
SIGLEC14	0
CD53	0
FCGBP	0
SLC47A1	0
SAPCD2	0
JAG1	0
CNN3	0
CHGA	0
CIITA	0
CD99	0
SLC10A4	0
CENPU	0
SLC7A14	0
CMTM3	0
LHX5	0
SLC1A5	0
ULBP3	0
CXCL11	0
DLL1	0
SERPINA1	0
CACNG4	0
ANTXR2	0
MYBL2	0
ENHO	0
OLFM1	0
SPRY2	0
RET	0
MAPT	0
RUNX1	0
HOXD13	0
PKIB	0
LTBR	0
SMC4	0
RASGEF1C	0
SNX10	0
PCSK6	0
FOXO6	0
RASEF	0
STAT5A	0
MTTP	0
AURKA	0
AGTRAP	0
CROT	0
EGR1	0
OTX1	0
RDH5	0
GLP1R	0
VWA1	0
WIPF3	0
GZMK	0
PARP14	0
HOXA3	0
LRRC25	0
FN1	0
CNR1	0
KIAA1549L	0
KLRC2	0
AHR	0
ZFP36L2	0
SHFL	0
LOXL1	0
BATF3	0
NR2E1	0
NMNAT2	0
MS4A6A	0
FTL	0
USP54	0
TGM5	0
NEK6	0
MEGF10	0
ABCD2	0
IFITM10	0
NKG7	0
DNALI1	0
ARNTL2	0
SCN1A	0
HP	0
SKAP2	0
BTK	0
EMP1	0
CD180	0
SMIM10	0
MYBPH	0
ECE1	0
MILR1	0
SERINC2	0
OLFML2A	0
AURKB	0
TMEM140	0
CDHR1	0
CDCA7L	0
ACCS	0
CHRM4	0
GABBR1	0
SFRP2	0
SCN3A	0
NPPA	0
DCX	0
PPL	0
PPM1M	0
TNFAIP6	0
MAP3K7CL	0
SLC43A3	0
RCOR2	0
FSTL5	0
SNAI1	0
TP53I13	0
EYA1	0
IL13RA2	0
PHF21B	0
FES	0
PHETA2	0
OAS3	0
CDK6	0
PITX1	0
KCNJ9	0
TMEM271	0
PRR36	0
FHDC1	0
P2RY1	0
CEBPD	0
GPR158	0
IGHM	0
TSPYL2	0
VRK2	0
CELSR3	0
CSRP1	0
SNAP25	0
OAS1	0
ZFP36	0
LILRA2	0
COL6A2	0
FZD7	0
NDRG2	0
CMYA5	0
MYOF	0
CELF5	0
CDH18	0
STC1	0
PCBP3	0
CRB2	0
EEPD1	0
NGFR	0
LRRC2	0
SLA	0
H2BC9	0
HLAafafDPA1	0
SLC2A10	0
GAS2L3	0
NECAB2	0
TMEM179	0
CPVL	0
UNC79	0
FBLL1	0
PDGFD	0
PTCRA	0
ZYX	0
RSPH1	0
BLM	0
LXN	0
NALCN	0
SH3GL3	0
KCNE5	0
SPEF1	0
SOX3	0
ELAVL2	0
PPP1R3B	0
SDC4	0
COL5A2	0
HPS1	0
KIF4A	0
ELN	0
ANKRD22	0
CADPS	0
LPCAT2	0
DES	0
HLAafafDOA	0
CSMD3	0
DLGAP1	0
HLAafafDMB	0
CERS1	0
CYB561	0
RCAN1	0
IRF7	0
RTN4RL2	0
TMEM35A	0
HOXA10	0
SAMD9L	0
LMO2	0
DDX60	0
NTN4	0
RHBDL3	0
HLAafafA	0
GABRB2	0
XKR7	0
LDHA	0
SCD	0
MORN3	0
NPM2	0
MAN1C1	0
HELZ2	0
SERTAD1	0
DPYSL4	0
HSPA6	0
SHANK1	0
ETV7	0
TNFRSF1A	0
ZDHHC12	0
ETV4	0
HERC6	0
UBXN10	0
CASP1	0
ANXA2R	0
SVOP	0
CAPG	0
RASSF10	0
NSG2	0
SLAMF8	0
XAF1	0
SPP1	0
H3C6	0
SPATA6	0
CRISPLD1	0
GRIA1	0
IL13RA1	0
TLX1	0
FAM81B	0
GNS	0
ZDHHC22	0
SECTM1	0
POGLUT3	0
B2M	0
KIF2C	0
LHFPL6	0
PLPPR3	0
C6orf141	0
OLR1	0
ADAMTSL4	0
INSM2	0
EHD2	0
NCF1	0
SSC5D	0
BCL7A	0
GPR45	0
ZC3HAV1L	0
CD2	0
TMEM176A	0
TCF19	0
SCRT2	0
HOXA5	0
ENTPD2	0
GNG4	0
TMEM185B	0
SIPA1L1	0
FGF12	0
GPRC5A	0
MICA	0
DGKB	0
PAK3	0
TRIM56	0
SMCP	0
IL20RA	0
ELF4	0
REPS2	0
GBP2	0
MRC2	0
FCGR3A	0
ZNF217	0
UPK2	0
VWF	0
HEXB	0
IL18	0
LINGO1	0
CTSK	0
IL4I1	0
IGFBP2	0
LRRC61	0
CRLF1	0
CD93	0
SULF2	0
MSR1	0
CLEC18B	0
IQCG	0
RASSF9	0
FAM180B	0
ITPRIPL1	0
LAMC3	0
HTRA3	0
BMP2	0
MGP	0
CLDN10	0
PCDH15	0
TUB	0
HPCAL4	0
USP43	0
LAT2	0
MARCHF4	0
WDR78	0
PRF1	0
OLIG1	0
SCAMP5	0
NEUROD1	0
MCAM	0
CDH6	0
TPPP3	0
GCH1	0
OTP	0
PCDHGA9	0
TYMS	0
GPR157	0
TNFRSF19	0
FMOD	0
LCTL	0
IGFN1	0
LUZP2	0
DENND2A	0
TMEM106C	0
MEGF11	0
MELK	0
KLHL4	0
GPR1	0
CALY	0
MXRA5	0
ROPN1L	0
IL1RAP	0
SPATS2L	0
CASP7	0
HBQ1	0
EPSTI1	0
ITGB8	0
KLRC4	0
ERC2	0
PTPRT	0
NPNT	0
PTX3	0
CDC20	0
RGR	0
PCDH11X	0
ANG	0
ITGB2	0
RCAN3	0
DOK6	0
LHFPL4	0
DEF6	0
GAL3ST1	0
C8orf88	0
MAP3K6	0
CD3D	0
PROS1	0
PSMB8	0
G0S2	0
VEGFA	0
DDIT4L	0
ABRACL	0
NDC80	0
LRRTM1	0
ITGA2	0
GLI3	0
S100A6	0
TEX26	0
TFRC	0
CHST2	0
MYC	0
NRXN1	0
KCNK12	0
CELF3	0
MEIS3	0
GRB14	0
SOCS3	0
TMEFF2	0
ARAP3	0
WDR38	0
ACAA2	0
CCNA2	0
S100A16	0
PLS3	0
TIMP1	0
GTSE1	0
TMEM121B	0
PLOD2	0
KHDRBS2	0
PCSK2	0
CPQ	0
E2F7	0
HOXA7	0
TRBC2	0
BGN	0
PBK	0
CPPED1	0
THEMIS2	0
MR1	0
APOBEC3F	0
SCGB1D2	0
CD86	0
TSTD1	0
SLC11A1	0
LCNL1	0
LFNG	0
GYG2	0
CHODL	0
LINC00672	0
AMOTL2	0
OASL	0
FREM2	0
PSRC1	0
RAPGEF4	0
DUSP10	0
CCL2	0
GBP4	0
IBSP	0
SKA1	0
TRIP10	0
NNMT	0
CDH20	0
FSD1	0
CA12	0
LAMC1	0
S100A11	0
STAT1	0
EFHC2	0
HLAafafDQA1	0
PDE1A	0
PTTG1	0
ABI3	0
CHAD	0
NFAM1	0
PBX3	0
TWSG1	0
TROAP	0
ZMYND10	0
EPHB1	0
CORO6	0
WNT16	0
PTPN7	0
COLEC12	0
MGARP	0
BATF	0
GABRA1	0
CARD16	0
ANGPT1	0
PIFO	0
CASKIN1	0
CCDC8	0
VIPR2	0
PTGER4	0
MAST1	0
PRLHR	0
MMP24	0
MVP	0
WEE1	0
NR2F2	0
CD109	0
BCL2A1	0
CCER2	0
CTTNBP2	0
RGS1	0
GRID1	0
UBE2QL1	0
TMEM100	0
ISG15	0
RNF165	0
TEAD4	0
MX2	0
UCP2	0
EFEMP1	0
ZFR2	0
ANGPT2	0
CACNA2D3	0
AJAP1	0
ECT2	0
CACNA2D2	0
GRIN3A	0
DGKK	0
LYPD6	0
SYP	0
DEPDC1	0
PTPRC	0
GNLY	0
PDIA5	0
B3GALT2	0
KIAA0040	0
MYO1E	0
TMEM67	0
VWC2L	0
DUSP23	0
CD14	0
BEST3	0
HSD3B7	0
ARHGDIB	0
TRIP6	0
MAGEH1	0
PODNL1	0
ANXA2	0
KLHDC8A	0
PRKCE	0
DACH2	0
L1CAM	0
SHD	0
C4B	0
IQGAP3	0
PARVG	0
H2BC12	0
DLL3	0
CNTN3	0
GPR82	0
COL9A3	0
TK1	0
COL3A1	0
CHGB	0
ENG	0
ZBTB42	0
DIRAS3	0
HLAafafF	0
ETNPPL	0
CD163	0
CD37	0
FAM183A	0
RHOD	0
COL5A3	0
COL4A2	0
GLUD1	0
TSPOAP1	0
HEBP1	0
DNM3	0
LUM	0
HMOX1	0
MOXD1	0
FAM13C	0
FCGR2A	0
PDGFRL	0
CD302	0
FAM126A	0
P4HA2	0
MFAP4	0
CGNL1	0
SERPINB8	0
NKAIN1	0
GZMH	0
PCED1B	0
CNNM1	0
HTR1A	0
CBLN1	0
TYROBP	0
PCDHB7	0
GPR65	0
PDIA2	0
TMEM158	0
KIF26A	0
IKBIP	0
OSCAR	0
ECM2	0
SHCBP1	0
CSDC2	0
COTL1	0
MYD88	0
VSTM2B	0
ADGRE5	0
BATF2	0
IGF2BP2	0
IFITM3	0
PRKCZ	0
ARL9	0
PDE2A	0
CRHR1	0
CENPE	0
ZIC5	0
YPEL4	0
ASPM	0
SERPINH1	0
CD276	0
SERTAD3	0
TRIM67	0
ACTL6B	0
MN1	0
OCIAD2	0
PARP12	0
CD24	0
TAFA1	0
GPR37	0
KCTD4	0
HRH3	0
ARHGAP18	0
LRRTM4	0
MAOB	0
NAMPT	0
TCEAL2	0
SLC44A3	0
BST2	0
FAHD2B	0
PLEK2	0
MT1E	0
LYN	0
CABP4	0
DRC1	0
DUSP6	0
ADGRB3	0
HS3ST3B1	0
NAP1L3	0
MMD2	0
SP100	0
PIMREG	0
IFI6	0
GPR183	0
LAMB1	0
LOXL2	0
PGF	0
LILRB1	0
NUDT11	0
PDLIM1	0
CHRNA1	0
GRIK1	0
RARRES2	0
GADD45A	0
GSX2	0
FYB1	0
ADPRH	0
ALOX5AP	0
POSTN	0
CDH22	0
ADAMTS1	0
DSCAM	0
INA	0
GPR27	0
SLC8A2	0
ELAVL4	0
TRIM21	0
CFI	0
NLRC5	0
TACC3	0
SPRY1	0
SPI1	0
GZMA	0
TREM2	0
C1orf158	0
MMP14	0
PLAT	0
HDHD3	0
AK4	0
CYTL1	0
NKAIN4	0
NETO1	0
HOXB4	0
GNAI1	0
PABPC1L	0
UBE2C	0
NQO1	0
STXBP6	0
LRATD2	0
THBS4	0
SLITRK5	0
HOXD10	0
ITPRID2	0
CHI3L2	0
AKAP6	0
SRPX2	0
EVA1B	0
RINL	0
CCNB2	0
HES6	0
ADORA1	0
HOXC9	0
POLR2F	0
LYVE1	0
SAMD11	0
HOXC4	0
SDC1	0
CACNA1A	0
SERPINB1	0
IFI44L	0
ALDH3A1	0
SLC1A1	0
FREM3	0
LGALS3	0
FUT9	0
MYT1L	0
GRIN1	0
DOK3	0
CALU	0
CLEC7A	0
SLC37A2	0
OTOS	0
CNMD	0
SORCS3	0
CLEC2L	0
P3H2	0
JUNB	0
NAT16	0
CYP27A1	0
GPRIN1	0
TUBB6	0
KCNN1	0
TAGLN3	0
CNTN1	0
RIBC2	0
GBP1	0
NFE2L3	0
IGDCC4	0
CEP55	0
KCNQ2	0
OPCML	0
FAIM2	0
TAX1BP3	0
RGS11	0
HOXC10	0
HTATIP2	0
MEOX2	0
SLC25A27	0
AMH	0
CLU	0
PAMR1	0
MTMR7	0
PHYHIPL	0
NEU4	0
SASH3	0
OAS2	0
SEC61G	0
GLIS3	0
RTP5	0
CA10	0
CD74	0
PLSCR1	0
RRM2	0
C2orf80	0
HK2	0
MICB	0
TMEM71	0
MDK	0
ST8SIA3	0
EVI2B	0
MGST2	0
CD63	0
EHD4	0
CD52	0
TOP2A	0
TMEM221	0
C16orf89	0
TOM1L1	0
PVALB	0
KLRC4afafKLRK1	0
GJB2	0
SOX8	0
KLRC3	0
NRG3	0
ATP8A1	0
PARP10	0
ICAM1	0
EFNB2	0
CALCRL	0
HLAafafDQA2	0
CXCL9	0
C21orf62	0
THBS1	0
RBM47	0
PID1	0
VAMP5	0
TAFA3	0
BRSK2	0
DNAH9	0
LGALS9	0
ZDHHC23	0
SLC16A3	0
SHROOM3	0
SPATA18	0
IRX2	0
CDC45	0
CELSR1	0
SMPD3	0
C4orf47	0
CALN1	0
GRID2	0
NEXN	0
CA2	0
CYBB	0
LTF	0
CYTIP	0
CLEC17A	0
CRYZ	0
UNC13A	0
SCIMP	0
PRSS23	0
CTBS	0
SLC25A20	0
MYCN	0
ISG20	0
GJD2	0
S100A2	0
C2	0
APLN	0
ARPC1B	0
GUSB	0
HRH1	0
FAH	0
SNCG	0
CNTNAP2	0
MYH7	0
TCIRG1	0
FBP1	0
GAL3ST4	0
CDK5R1	0
PDE6B	0
MFAP2	0
SOCS1	0
HOXA4	0
SEMA3D	0
EID3	0
LY6H	0
C1QB	0
KIF18A	0
PLPPR1	0
BHLHE40	0
MAP2	0
SPA17	0
SLC26A2	0
TRAC	0
PROM1	0
CPLX2	0
TRIP4	0
APOC2	0
PHLDA2	0
LOXL3	0
PTPN6	0
FAM50B	0
PTPRN	0
RIPOR3	0
INMT	0
COL16A1	0
NFATC2	0
SLC47A2	0
IFNLR1	0
GPX8	0
EN2	0
HOXA9	0
CD48	0
TENT5B	0
ST14	0
SAA1	0
NTNG1	0
SPON2	0
WSCD2	0
CEBPA	0
ITGAX	0
VASN	0
CDK2	0
RHOJ	0
BUB1B	0
SLC12A5	0
CAPN5	0
ZNF474	0
RASL10A	0
SNX22	0
S100A10	0
SSTR1	0
APOBEC3C	0
DLGAP5	0
DGCR6	0
RAC3	0
PHEX	0
SEPTIN3	0
C1orf54	0
SOX6	0
INPP5D	0
LRIT2	0
DPEP1	0
HJURP	0
AQP1	0
FILIP1L	0
FAM133A	0
H2AJ	0
C1orf189	0
C6orf118	0
CMTM5	0
SCG3	0
IFI35	0
NMI	0
XKR8	0
AQP5	0
CXCL10	0
MCF2	0
STK32B	0
GPR17	0
GDPD2	0
SLC7A7	0
LCP2	0
MB21D2	0
CKAP2L	0
HFE	0
COL4A1	0
ZMYND12	0
HMGCLL1	0
FBLN7	0
SEZ6L	0
SYDE1	0
SOCS2	0
MYZAP	0
ADAMTS3	0
HERC5	0
GBP3	0
ARC	0
FBXL16	0
C9orf24	0
VCAM1	0
KANK2	0
FNDC10	0
ALDH1A3	0
CCL5	0
TGIF1	0
C7orf31	0
CENPV	0
FAM83D	0
SPAG1	0
LPAR6	0
TM4SF1	0
MATN2	0
RSAD2	0
SHANK2	0
GLIPR1	0
LOXL4	0
HLAafafDMA	0
INAFM1	0
LOX	0
FGF13	0
UNC80	0
DDX60L	0
WWTR1	0
LAMB2	0
CCN1	0
C1orf194	0
PTGFRN	0
TNFAIP2	0
REEP4	0
LRRN4CL	0
EPOP	0
MEST	0
FERMT1	0
NEUROD6	0
ANGPTL2	0
MYO1F	0
NOG	0
RPS6KA1	0
ANKRD53	0
HLAafafB	0
CD300LF	0
CUL7	0
CHD5	0
CCDC146	0
TCTN2	0
CAMKV	0
LYZ	0
CLEC5A	0
CHAF1B	0
LAPTM5	0
ENPP1	0
KLHL26	0
OLFML3	0
PPP1R1C	0
KCNB1	0
GJC1	0
RIMS2	0
ACACB	0
CDKN2C	0
ZNF488	0
PDGFRA	0
STXBP1	0
ECHDC2	0
ADM	0
TCTEX1D1	0
SLC6A9	0
APOBEC3G	0
RHPN2	0
CCR5	0
DLC1	0
LAP3	0
PPIC	0
CXXC4	0
PPP1R1A	0
UNC93B1	0
SPRY4	0
KCNC2	0
FAM114A1	0
SSH3	0
FZD6	0
CDCP1	0
NUAK2	0
PAX3	0
COL26A1	0
SELENON	0
YAP1	0
KIF20A	0
YBX3	0
FXYD1	0
C10orf105	0
ITPKC	0
KSR2	0
HLAafafDQB2	0
FNDC3B	0
C2orf50	0
SH3BGR	0
WDR86	0
MICALL2	0
ATRNL1	0
CENPK	0
GFRA1	0
SPHKAP	0
ADGRA1	0
TCEA3	0
MARCHF8	0
PLEKHG1	0
GABBR2	0
SLC25A45	0
SP8	0
KCND2	0
CALHM6	0
ATP8A2	0
CALD1	0
COLGALT1	0
FCER1G	0
FAM181A	0
MKX	0
TCF7	0
F11R	0
DEDD2	0
ATP2B3	0
KDELR2	0
SAMD9	0
PDZD4	0
MT1A	0
MMRN1	0
DDX25	0
PI16	0
AKR1C3	0
SHOX2	0
SH3GL2	0
ITGA7	0
DDR2	0
LHFPL3	0
IGFBP3	0
COL5A1	0
HOXA6	0
TTC9B	0
FZD1	0
C1QA	0
ADAM22	0
HAMP	0
PTGS1	0
CARD19	0
GRIA4	0
F3	0
HOXD9	0
ARSL	0
CTSZ	0
HTR2A	0
CCDC89	0
KIF21B	0
COL8A2	0
TREM1	0
CFAP100	0
LMNA	0
TXLNB	0
ACTN1	0
SLC13A3	0
HLAafafC	0
SPRED2	0
GBP5	0
SEMA6B	0
CD69	0
CLEC4F	0
ODF3B	0
HSPB7	0
MLLT11	0
PMP22	0
CTHRC1	0
TLR2	0
MCF2L2	0
PNMA3	0
LPAR1	0
DHX58	0
ABCA5	0
KCNJ11	0
CASP4	0
FAM20C	0
SCN2B	0
LRAT	0
EMILIN3	0
ABCC8	0
MMP19	0
SPINK8	0
PDIA4	0
GEM	0
BEST4	0
SERPINA3	0
HOXB7	0
TSHR	0
EPHA10	0
STMN2	0
JUN	0
CYBRD1	0
PARP9	0
APBB1IP	0
CAST	0
EVA1C	0
FBXO32	0
RPRM	0
AR	0
UGT8	0
SNAI2	0
KCNN4	0
COL27A1	0
HOXB2	0
GATM	0
HAVCR2	0
WNT7B	0
KIF3C	0
PLAUR	0
TENT5A	0
CDH4	0
TRDC	0
RUNDC3A	0
OMG	0
OLIG2	0
JPH3	0
GABRA3	0
NCAPG	0
HSPG2	0
SYTL3	0
CRYBG1	0
TWIST1	0
TNR	0
FLNA	0
AL049839.2	0
FAM222A	0
DEPP1	0
CD3E	0
DPP10	0
SLC25A48	0
DENND2D	0
TIFA	0
AOX1	0
CD274	0
COL1A2	0
CP	0
PPP4R4	0
CELF4	0
AMIGO2	0
LRTM2	0
LY96	0
DAPL1	0
MTMR11	0
CNPY1	0
ANO6	0
ZC3H12B	0
MAB21L1	0
PROCR	0
PHF11	0
FOSL1	0
ADARB2	0
TTC38	0
PIPOX	0
PLAAT5	0
USH1C	0
SYT4	0
ARSJ	0
KCNE4	0
TRIM5	0
PYCARD	0
NEK2	0
SATB1	0
JHY	0
TMEM176B	0
S100A13	0
DPY19L1	0
COL12A1	0
SPC24	0
CENPF	0
SLC25A43	0
NUSAP1	0
C1QTNF1	0
RUBCNL	0
SMIM18	0
NDN	0
EYA2	0
FBLN5	0
PSMB9	0
HAPLN1	0
S1PR3	0
SNCB	0
ADGRB1	0
TNNT1	0
HCLS1	0
TMTC2	0
HECW1	0
SPOCD1	0
HOPX	0
MMP9	0
AMZ1	0
SCN3B	0
STEAP1	0
RPL39L	0
WDR63	0
IL2RG	0
IQGAP2	0
DERL3	0
CDCA8	0
CTSC	0
ESM1	0
KHNYN	0
