# Supplementary material for: Development of a Metabolic Subtype Classifier for Low- Grade Glioma to Guide Precision Therapy
Source: Research Square preprint supplement (doi:10.21203/rs.3.rs-7778086/v1), 2025-12-16
Supplement: Supplementary file 22 [file data.xlsx]

## Sheet: Sheet1
id	group	Response
CGGA_1002	1	1
CGGA_1003	1	0
CGGA_1004	0	0
CGGA_1005	1	0
CGGA_1006	0	0
CGGA_1010	1	0
CGGA_1012	0	0
CGGA_1013	1	0
CGGA_1014	1	0
CGGA_1018	1	0
CGGA_1020	1	1
CGGA_1022	0	0
CGGA_1027	1	1
CGGA_103	1	0
CGGA_1030	1	1
CGGA_1031	1	1
CGGA_1032	1	0
CGGA_1033	1	1
CGGA_1034	1	1
CGGA_1037	1	0
CGGA_1046	1	1
CGGA_1048	1	1
CGGA_1051	1	1
CGGA_1055	1	0
CGGA_1057	0	0
CGGA_1058	0	1
CGGA_1059	0	0
CGGA_106	0	0
CGGA_1061	1	0
CGGA_1065	1	0
CGGA_1066	0	0
CGGA_107	0	0
CGGA_1071	0	0
CGGA_1079	0	0
CGGA_108	0	1
CGGA_1081	0	0
CGGA_1087	1	0
CGGA_1094	1	0
CGGA_1097	0	0
CGGA_1100	1	1
CGGA_1101	1	1
CGGA_1108	0	1
CGGA_1111	0	0
CGGA_1113	1	0
CGGA_1118	1	1
CGGA_112	1	0
CGGA_1120	1	0
CGGA_1121	1	0
CGGA_1126	1	0
CGGA_1127	1	1
CGGA_1131	1	0
CGGA_1132	1	1
CGGA_1137	1	0
CGGA_1140	1	1
CGGA_1141	1	1
CGGA_1144	1	1
CGGA_1145	0	0
CGGA_1146	1	1
CGGA_1147	1	0
CGGA_1148	0	1
CGGA_1152	0	0
CGGA_1154	0	1
CGGA_1155	1	1
CGGA_1156	1	0
CGGA_1157	1	0
CGGA_1158	1	0
CGGA_1159	1	1
CGGA_1160	0	1
CGGA_1161	1	0
CGGA_1162	1	0
CGGA_1169	1	1
CGGA_1178	1	0
CGGA_1181	1	0
CGGA_1183	1	0
CGGA_1184	1	1
CGGA_1185	0	0
CGGA_1189	1	0
CGGA_1190	1	0
CGGA_1191	1	0
CGGA_1192	0	0
CGGA_1195	0	0
CGGA_1198	1	0
CGGA_1204	1	0
CGGA_1205	1	0
CGGA_1207	1	1
CGGA_1211	1	1
CGGA_1212	1	1
CGGA_1215	0	0
CGGA_1223	0	0
CGGA_1226	1	1
CGGA_1228	1	1
CGGA_1231	0	0
CGGA_1232	1	1
CGGA_1235	0	1
CGGA_1238	0	0
CGGA_1239	1	0
CGGA_1246	1	0
CGGA_1263	1	1
CGGA_1264	1	1
CGGA_1269	1	0
CGGA_1273	1	0
CGGA_1280	1	1
CGGA_1281	1	1
CGGA_1284	0	1
CGGA_1286	1	0
CGGA_1291	1	0
CGGA_1292	1	0
CGGA_1295	0	0
CGGA_1300	0	1
CGGA_1303	1	1
CGGA_1305	1	1
CGGA_1307	0	0
CGGA_1309	1	0
CGGA_1311	1	0
CGGA_1317	1	1
CGGA_1318	0	1
CGGA_1319	1	1
CGGA_1321	1	0
CGGA_1322	1	0
CGGA_1329	1	0
CGGA_1330	0	0
CGGA_1334	0	1
CGGA_1335	1	0
CGGA_1339	1	0
CGGA_1340	1	0
CGGA_1345	0	0
CGGA_135	0	0
CGGA_1350	1	0
CGGA_1356	1	1
CGGA_1359	0	0
CGGA_1361	1	1
CGGA_1362	1	1
CGGA_1368	1	0
CGGA_1369	1	1
CGGA_1374	1	1
CGGA_1377	1	1
CGGA_1383	1	1
CGGA_1386	1	0
CGGA_1388	0	0
CGGA_1389	1	0
CGGA_1390	1	1
CGGA_1398	1	0
CGGA_1400	1	0
CGGA_1401	1	1
CGGA_1404	1	0
CGGA_1406	0	1
CGGA_1407	0	1
CGGA_1408	0	0
CGGA_1411	1	0
CGGA_1413	1	1
CGGA_1416	1	0
CGGA_1417	1	0
CGGA_1421	1	0
CGGA_1424	1	0
CGGA_1427	1	1
CGGA_1431	1	1
CGGA_1434	0	0
CGGA_1435	1	0
CGGA_1437	1	1
CGGA_1440	1	0
CGGA_1443	0	0
CGGA_1445	1	0
CGGA_1446	1	0
CGGA_1447	1	0
CGGA_1454	1	1
CGGA_1455	1	0
CGGA_1458	1	0
CGGA_1459	0	0
CGGA_1463	1	0
CGGA_1469	1	0
CGGA_1471	1	1
CGGA_1473	1	1
CGGA_1474	1	0
CGGA_1477	1	1
CGGA_1482	1	0
CGGA_1487	0	0
CGGA_1488	1	1
CGGA_1497	1	0
CGGA_1502	1	0
CGGA_1504	1	1
CGGA_1508	1	0
CGGA_1510	0	0
CGGA_1513	1	0
CGGA_1514	1	0
CGGA_1516	1	0
CGGA_1517	1	0
CGGA_1518	1	0
CGGA_1523	1	1
CGGA_1524	1	0
CGGA_1525	1	1
CGGA_1526	1	1
CGGA_1527	1	1
CGGA_1528	1	1
CGGA_1530	1	1
CGGA_1533	0	0
CGGA_1536	1	1
CGGA_1544	1	0
CGGA_1552	1	0
CGGA_1553	1	1
CGGA_1554	1	0
CGGA_1557	1	0
CGGA_1562	1	0
CGGA_1563	0	0
CGGA_1565	1	1
CGGA_1566	1	0
CGGA_1567	1	0
CGGA_1568	1	1
CGGA_1569	1	0
CGGA_157	1	1
CGGA_1575	0	1
CGGA_1579	1	1
CGGA_1580	1	1
CGGA_1583	1	1
CGGA_1587	1	1
CGGA_1588	0	0
CGGA_1589	1	1
CGGA_1591	1	1
CGGA_1592	1	0
CGGA_1594	1	1
CGGA_1598	0	0
CGGA_1606	1	0
CGGA_1607	0	1
CGGA_1608	1	0
CGGA_1610	0	0
CGGA_1614	1	1
CGGA_1617	1	0
CGGA_1618	1	0
CGGA_1619	1	0
CGGA_1620	1	1
CGGA_1621	1	0
CGGA_1623	0	0
CGGA_1627	1	1
CGGA_1630	1	0
CGGA_1640	1	0
CGGA_1642	1	1
CGGA_1645	1	1
CGGA_1647	1	0
CGGA_1648	1	0
CGGA_1649	1	0
CGGA_165	1	1
CGGA_1651	1	1
CGGA_1653	1	1
CGGA_1655	1	1
CGGA_1657	1	1
CGGA_1661	1	1
CGGA_1662	1	1
CGGA_1664	1	0
CGGA_1667	1	1
CGGA_1669	0	0
CGGA_1670	0	0
CGGA_1671	1	0
CGGA_1673	1	0
CGGA_1675	1	1
CGGA_1679	1	0
CGGA_1680	1	0
CGGA_1685	1	0
CGGA_1686	0	0
CGGA_1688	1	0
CGGA_1689	1	1
CGGA_1693	1	0
CGGA_1695	1	0
CGGA_1696	1	0
CGGA_1700	0	0
CGGA_1701	1	0
CGGA_1703	1	1
CGGA_1704	1	1
CGGA_1714	1	0
CGGA_1715	0	0
CGGA_1716	1	1
CGGA_1718	1	0
CGGA_1720	1	0
CGGA_1721	1	0
CGGA_1723	1	0
CGGA_1725	1	0
CGGA_1731	1	0
CGGA_1737	1	0
CGGA_1738	0	0
CGGA_1739	0	0
CGGA_1743	1	1
CGGA_1745	1	0
CGGA_1747	1	1
CGGA_1760	0	0
CGGA_1771	1	0
CGGA_1786	1	0
CGGA_1791	1	0
CGGA_1809	1	0
CGGA_1829	1	1
CGGA_1850	1	1
CGGA_1854	1	1
CGGA_1862	1	0
CGGA_1863	1	0
CGGA_1875	0	0
CGGA_1880	1	0
CGGA_1882	1	0
CGGA_1902	0	0
CGGA_1903	1	1
CGGA_1906	0	0
CGGA_194	1	0
CGGA_1994	1	0
CGGA_2002	0	0
CGGA_2006	1	1
CGGA_2013	0	0
CGGA_2046	0	0
CGGA_2079	1	0
CGGA_2081	1	0
CGGA_2121	0	0
CGGA_2129	1	1
CGGA_235	1	0
CGGA_236	1	0
CGGA_241	1	0
CGGA_243	1	0
CGGA_245	0	0
CGGA_247	1	0
CGGA_251	1	0
CGGA_252	1	0
CGGA_254	1	1
CGGA_256	1	0
CGGA_261	1	1
CGGA_265	1	0
CGGA_267	1	0
CGGA_269	0	0
CGGA_273	1	1
CGGA_276	1	1
CGGA_277	1	0
CGGA_279	0	0
CGGA_28	1	1
CGGA_283	1	1
CGGA_288	0	0
CGGA_290	1	0
CGGA_300	1	1
CGGA_314	1	1
CGGA_320	1	1
CGGA_323	1	1
CGGA_330	0	0
CGGA_333	1	0
CGGA_336	1	1
CGGA_337	1	0
CGGA_358	1	0
CGGA_369	1	1
CGGA_400	1	1
CGGA_406	1	0
CGGA_42	0	1
CGGA_420	1	0
CGGA_426	0	0
CGGA_431	1	0
CGGA_446	1	0
CGGA_448	0	0
CGGA_457	0	0
CGGA_458	1	0
CGGA_474	0	0
CGGA_479	1	1
CGGA_482	1	1
CGGA_485	1	1
CGGA_488	0	0
CGGA_490	1	1
CGGA_492	0	0
CGGA_493	1	1
CGGA_501	1	1
CGGA_502	1	1
CGGA_503	1	1
CGGA_507	1	1
CGGA_510	1	0
CGGA_521	1	0
CGGA_541	1	1
CGGA_543	1	1
CGGA_551	1	1
CGGA_554	1	0
CGGA_560	1	0
CGGA_564	0	1
CGGA_565	1	1
CGGA_578	1	1
CGGA_580	1	1
CGGA_583	1	0
CGGA_591	1	1
CGGA_598	1	0
CGGA_599	1	1
CGGA_601	1	1
CGGA_603	1	0
CGGA_605	0	0
CGGA_607	1	1
CGGA_616	0	0
CGGA_619	0	0
CGGA_625	1	0
CGGA_630	1	1
CGGA_632	1	0
CGGA_633	1	0
CGGA_634	1	1
CGGA_635	1	0
CGGA_638	1	0
CGGA_641	1	0
CGGA_642	1	1
CGGA_643	1	0
CGGA_652	1	0
CGGA_655	1	1
CGGA_659	1	1
CGGA_662	1	1
CGGA_663	1	1
CGGA_666	1	1
CGGA_671	1	0
CGGA_675	1	0
CGGA_678	0	0
CGGA_685	1	1
CGGA_689	1	0
CGGA_694	0	1
CGGA_698	1	1
CGGA_703	0	0
CGGA_704	1	1
CGGA_705	1	1
CGGA_707	1	1
CGGA_715	1	0
CGGA_720	1	0
CGGA_721	1	1
CGGA_724	1	0
CGGA_725	1	1
CGGA_727	0	0
CGGA_730	0	1
CGGA_738	1	1
CGGA_752	1	1
CGGA_757	1	1
CGGA_760	1	1
CGGA_762	1	1
CGGA_763	1	1
CGGA_766	1	0
CGGA_780	1	1
CGGA_785	1	1
CGGA_791	1	0
CGGA_796	1	1
CGGA_799	1	0
CGGA_807	1	1
CGGA_809	1	1
CGGA_810	0	0
CGGA_812	1	0
CGGA_815	1	0
CGGA_818	1	0
CGGA_825	1	1
CGGA_834	1	0
CGGA_835	1	0
CGGA_838	1	0
CGGA_843	1	0
CGGA_846	1	1
CGGA_852	0	0
CGGA_856	1	0
CGGA_858	1	0
CGGA_861	0	1
CGGA_863	1	1
CGGA_864	1	1
CGGA_867	0	0
CGGA_871	1	0
CGGA_881	0	0
CGGA_882	1	1
CGGA_884	1	0
CGGA_888	1	0
CGGA_889	1	0
CGGA_890	1	0
CGGA_892	1	1
CGGA_893	1	1
CGGA_898	1	1
CGGA_901	1	1
CGGA_903	1	1
CGGA_904	1	0
CGGA_905	1	1
CGGA_908	1	1
CGGA_909	1	1
CGGA_D04	1	0
CGGA_D07	1	1
CGGA_D11	0	0
CGGA_D15	1	0
CGGA_D16	0	0
CGGA_D19	1	0
CGGA_D20	1	0
CGGA_D21	1	0
CGGA_D24	1	0
CGGA_D27	1	0
CGGA_D28	1	0
CGGA_D29	1	1
CGGA_D33	1	0
CGGA_D40	1	0
CGGA_D44	1	0
CGGA_D45	1	0
CGGA_D46	1	0
CGGA_D47	1	1
CGGA_D48	1	0
CGGA_D50	1	0
CGGA_D52	1	0
CGGA_D56	1	0
CGGA_D58	1	0
CGGA_J023	1	0
CGGA_J024	1	1
CGGA_J030	1	1
CGGA_J042	0	0
CGGA_J130	1	1
CGGA_J50	1	1
CGGA_J73	1	0
CGGA_P103	1	0
CGGA_P104	1	0
CGGA_P108	1	0
CGGA_P110	1	0
CGGA_P111	1	0
CGGA_P113	1	1
CGGA_P115	1	0
CGGA_P121	1	1
CGGA_P122	1	0
CGGA_P128	1	1
CGGA_P13	1	0
CGGA_P131	1	0
CGGA_P132	1	1
CGGA_P137	1	1
CGGA_P142	0	1
CGGA_P144	1	1
CGGA_P145	1	1
CGGA_P147	1	1
CGGA_P151	1	0
CGGA_P153	1	0
CGGA_P155	1	0
CGGA_P156	1	0
CGGA_P157	0	0
CGGA_P158	1	0
CGGA_P159	0	1
CGGA_P163	1	1
CGGA_P165	1	0
CGGA_P17	1	1
CGGA_P172	1	0
CGGA_P173	1	1
CGGA_P174	1	1
CGGA_P176	1	0
CGGA_P177	1	1
CGGA_P179	1	1
CGGA_P18	1	1
CGGA_P181	0	1
CGGA_P183	1	0
CGGA_P185	1	0
CGGA_P19	1	1
CGGA_P20	1	0
CGGA_P21	1	0
CGGA_P23	1	0
CGGA_P265	1	0
CGGA_P266	1	0
CGGA_P269	0	0
CGGA_P27	1	0
CGGA_P271	1	0
CGGA_P279	1	0
CGGA_P286	1	0
CGGA_P29	1	0
CGGA_P3	1	0
CGGA_P30	0	0
CGGA_P306	1	0
CGGA_P308	1	0
CGGA_P31	1	0
CGGA_P310	1	0
CGGA_P311	0	0
CGGA_P314	1	0
CGGA_P315	1	0
CGGA_P316	1	0
CGGA_P319	1	0
CGGA_P326	1	0
CGGA_P328	0	0
CGGA_P337	1	0
CGGA_P338	1	0
CGGA_P346	0	0
CGGA_P356	1	0
CGGA_P358	1	0
CGGA_P364	0	0
CGGA_P388	0	1
CGGA_P392	1	0
CGGA_P399	1	0
CGGA_P416	1	0
CGGA_P421	0	1
CGGA_P422	1	0
CGGA_P437	1	1
CGGA_P438	1	0
CGGA_P439	1	0
CGGA_P446	1	0
CGGA_P461	1	0
CGGA_P468	1	0
CGGA_P483	1	0
CGGA_P492	1	0
CGGA_P5	0	0
CGGA_P500	1	0
CGGA_P501	1	0
CGGA_P505	1	0
CGGA_P508	1	0
CGGA_P510	0	0
CGGA_P520	1	1
CGGA_P568	1	1
CGGA_P594	0	0
CGGA_P604	1	0
CGGA_P633	1	0
CGGA_P83	1	1
CGGA_P84	1	1
CGGA_P86	1	0
CGGA_P93	1	1
CGGA_P98	1	0
