# Supplementary material for: Development of a Metabolic Subtype Classifier for Low- Grade Glioma to Guide Precision Therapy
Source: Research Square preprint supplement (doi:10.21203/rs.3.rs-7778086/v1), 2025-12-16
Supplement: Supplementary file 28 [file data3.xlsx]

## Sheet: Sheet1
ID	group	codeletion_1p19q
CGGA_1059	1	1
CGGA_1215	1	1
CGGA_D56	0	1
CGGA_1284	1	1
CGGA_D33	0	1
CGGA_1374	0	1
CGGA_256	0	1
CGGA_252	0	1
CGGA_603	0	1
CGGA_D58	0	0
CGGA_1081	1	1
CGGA_D48	0	1
CGGA_1145	1	1
CGGA_791	0	1
CGGA_1094	0	1
CGGA_1322	0	1
CGGA_1006	1	1
CGGA_D16	1	1
CGGA_662	0	0
CGGA_D46	0	1
CGGA_D44	0	1
CGGA_245	1	1
CGGA_1329	0	1
CGGA_1411	0	1
CGGA_643	0	1
CGGA_448	1	1
CGGA_578	0	1
CGGA_678	1	1
CGGA_1118	0	1
CGGA_599	0	1
CGGA_458	0	1
CGGA_1160	1	1
CGGA_488	1	1
CGGA_1280	0	1
CGGA_892	0	0
CGGA_1079	1	1
CGGA_1388	1	1
CGGA_835	0	0
CGGA_1022	1	1
CGGA_276	0	1
CGGA_1061	0	1
CGGA_796	0	1
CGGA_632	0	1
CGGA_247	0	1
CGGA_564	1	1
CGGA_236	0	0
CGGA_659	0	1
CGGA_1034	0	1
CGGA_1263	0	1
CGGA_904	0	1
CGGA_D11	1	1
CGGA_D24	0	1
CGGA_D45	0	1
CGGA_1004	1	1
CGGA_1140	0	1
CGGA_616	1	1
CGGA_1307	1	1
CGGA_337	0	1
CGGA_727	1	1
CGGA_J023	0	1
CGGA_757	0	1
CGGA_D47	0	0
CGGA_1340	0	1
CGGA_1020	0	1
CGGA_330	1	1
CGGA_884	0	1
CGGA_601	0	1
CGGA_694	1	1
CGGA_D21	0	1
CGGA_1113	0	0
CGGA_856	0	0
CGGA_251	0	1
CGGA_400	0	1
CGGA_1408	1	1
CGGA_267	0	1
CGGA_607	0	1
CGGA_580	0	1
CGGA_J042	1	1
CGGA_426	1	1
CGGA_591	0	1
CGGA_898	0	1
CGGA_1013	0	1
CGGA_333	0	1
CGGA_633	0	1
CGGA_698	0	1
CGGA_1406	1	1
CGGA_300	0	1
CGGA_815	0	1
CGGA_1231	1	1
CGGA_235	0	0
CGGA_D20	0	1
CGGA_493	0	1
CGGA_638	0	0
CGGA_908	0	1
CGGA_485	0	0
CGGA_1031	0	1
CGGA_1146	0	1
CGGA_666	0	0
CGGA_314	0	0
CGGA_704	0	1
CGGA_273	0	1
CGGA_1027	0	0
CGGA_1330	1	1
CGGA_1292	0	1
CGGA_1281	0	0
CGGA_269	1	1
CGGA_1246	0	0
CGGA_243	0	0
CGGA_1189	0	0
CGGA_1190	0	1
CGGA_J130	0	1
CGGA_893	0	1
CGGA_905	0	1
CGGA_685	0	1
CGGA_1071	1	1
CGGA_J030	0	0
CGGA_J024	0	1
CGGA_641	0	0
CGGA_715	0	0
CGGA_283	0	0
CGGA_785	0	0
CGGA_D52	0	0
CGGA_D40	0	1
CGGA_1046	0	2
CGGA_565	0	1
CGGA_D29	0	0
CGGA_D27	0	0
CGGA_D15	0	0
CGGA_598	0	0
CGGA_752	0	0
CGGA_D07	0	0
CGGA_D04	0	1
CGGA_490	0	0
CGGA_1005	0	1
CGGA_909	0	1
CGGA_871	0	0
CGGA_864	0	0
CGGA_858	0	0
CGGA_843	0	0
CGGA_838	0	0
CGGA_834	0	1
CGGA_818	0	1
CGGA_812	0	0
CGGA_807	0	1
CGGA_766	0	0
CGGA_762	0	0
CGGA_760	0	0
CGGA_261	0	1
CGGA_738	0	1
CGGA_725	0	0
CGGA_689	0	0
CGGA_675	0	0
CGGA_671	0	0
CGGA_655	0	0
CGGA_642	0	1
CGGA_635	0	0
CGGA_630	0	0
CGGA_605	1	1
CGGA_323	0	1
CGGA_560	0	1
CGGA_551	0	0
CGGA_543	0	0
CGGA_541	0	1
CGGA_510	0	0
CGGA_502	0	1
CGGA_501	0	0
CGGA_479	0	0
CGGA_446	0	0
CGGA_431	0	0
CGGA_277	0	2
CGGA_254	0	0
CGGA_241	0	1
CGGA_106	1	1
CGGA_290	0	0
CGGA_369	0	1
CGGA_503	0	1
CGGA_663	0	1
CGGA_724	0	1
CGGA_265	0	1
CGGA_889	0	1
CGGA_1003	0	0
CGGA_1012	1	1
CGGA_1030	0	1
CGGA_420	0	0
CGGA_1065	0	0
CGGA_1100	0	2
CGGA_707	0	0
CGGA_1121	0	1
CGGA_1131	0	1
CGGA_1132	0	0
CGGA_1137	0	2
CGGA_1147	0	1
CGGA_1152	1	1
CGGA_1156	0	1
CGGA_1158	0	0
CGGA_1159	0	1
CGGA_1161	0	1
CGGA_1162	0	0
CGGA_583	0	2
CGGA_1191	0	0
CGGA_1192	1	1
CGGA_1198	0	2
CGGA_1204	0	0
CGGA_1207	0	0
CGGA_1211	0	0
CGGA_320	0	0
CGGA_1235	1	1
CGGA_1239	0	0
CGGA_1238	1	1
CGGA_846	0	1
CGGA_890	0	1
CGGA_1264	0	0
CGGA_1269	0	0
CGGA_1286	0	0
CGGA_1317	0	2
CGGA_1303	0	2
CGGA_1319	0	1
CGGA_1335	0	0
CGGA_1339	0	0
CGGA_42	1	0
CGGA_1345	1	0
CGGA_1350	0	2
CGGA_1361	0	1
CGGA_1362	0	1
CGGA_1368	0	2
CGGA_1377	0	1
CGGA_1386	0	0
CGGA_1400	0	0
CGGA_1404	0	0
CGGA_1407	1	0
CGGA_1413	0	0
CGGA_1417	0	0
CGGA_1305	0	1
CGGA_1421	0	1
CGGA_1111	1	1
CGGA_1424	0	2
CGGA_1440	0	0
CGGA_1443	1	1
CGGA_1446	0	2
CGGA_1445	0	2
CGGA_1454	0	1
CGGA_1455	0	2
CGGA_1463	0	0
CGGA_634	0	1
CGGA_1127	0	0
CGGA_1228	0	1
CGGA_1469	0	2
CGGA_1471	0	1
CGGA_1482	0	0
CGGA_1488	0	1
CGGA_1502	0	0
CGGA_1504	0	1
CGGA_721	0	1
CGGA_336	0	0
CGGA_1516	0	0
CGGA_1517	0	0
CGGA_1018	0	0
CGGA_482	0	0
CGGA_1523	0	1
CGGA_1144	0	1
CGGA_1526	0	0
CGGA_1528	0	0
CGGA_1530	0	1
CGGA_625	0	0
CGGA_1273	0	1
CGGA_1552	0	0
CGGA_1557	0	0
CGGA_1563	1	1
CGGA_1291	0	0
CGGA_1566	0	0
CGGA_1579	0	1
CGGA_1513	0	0
CGGA_1618	0	1
CGGA_1620	0	0
CGGA_1621	0	1
CGGA_1617	0	0
CGGA_1623	1	1
CGGA_194	0	0
CGGA_1627	0	1
CGGA_1212	0	1
CGGA_1640	0	1
CGGA_1642	0	1
CGGA_1647	0	0
CGGA_1649	0	0
CGGA_1653	0	1
CGGA_1657	0	1
CGGA_1661	0	1
CGGA_1667	0	0
CGGA_1671	0	1
CGGA_1630	0	0
CGGA_1673	0	1
CGGA_107	1	1
CGGA_1675	0	1
CGGA_1679	0	0
CGGA_P3	0	2
CGGA_1689	0	1
CGGA_730	1	0
CGGA_1695	0	1
CGGA_1700	1	0
CGGA_863	0	1
CGGA_1232	0	1
CGGA_1704	0	1
CGGA_1390	0	1
CGGA_1431	0	1
CGGA_1714	0	0
CGGA_1715	1	1
CGGA_1562	0	0
CGGA_474	1	1
CGGA_1588	1	1
CGGA_1645	0	1
CGGA_1718	0	1
CGGA_1720	0	1
CGGA_1721	0	0
CGGA_1723	0	0
CGGA_1725	0	0
CGGA_1731	0	1
CGGA_1608	0	1
CGGA_1737	0	0
CGGA_P13	0	0
CGGA_1416	0	0
CGGA_P17	0	0
CGGA_1745	0	2
CGGA_P19	0	1
CGGA_135	1	1
CGGA_P20	0	1
CGGA_P21	0	1
CGGA_P31	0	1
CGGA_799	0	0
CGGA_1786	0	0
CGGA_1300	1	1
CGGA_1169	0	1
CGGA_1648	0	0
CGGA_1527	0	1
CGGA_P113	0	1
CGGA_P83	0	1
CGGA_1701	0	0
CGGA_P84	0	1
CGGA_P86	0	0
CGGA_J50	0	2
CGGA_1525	0	1
CGGA_1401	0	1
CGGA_P93	0	1
CGGA_1389	0	0
CGGA_1435	0	1
CGGA_P103	0	0
CGGA_P108	0	1
CGGA_P111	0	0
CGGA_P122	0	0
CGGA_P115	0	2
CGGA_1854	0	1
CGGA_1055	0	1
CGGA_P121	0	1
CGGA_1583	0	1
CGGA_P132	0	0
CGGA_P131	0	0
CGGA_1863	0	0
CGGA_1703	0	1
CGGA_1592	0	0
CGGA_P128	0	1
CGGA_P151	0	1
CGGA_1580	0	1
CGGA_P144	0	1
CGGA_1875	1	1
CGGA_P142	1	0
CGGA_1057	1	1
CGGA_112	0	1
CGGA_1882	0	0
CGGA_1664	0	1
CGGA_P137	0	1
CGGA_P183	0	0
CGGA_P158	0	2
CGGA_705	0	1
CGGA_1318	1	1
CGGA_1662	0	0
CGGA_P156	0	0
CGGA_P153	0	2
CGGA_P155	0	1
CGGA_P174	0	0
CGGA_1902	1	1
CGGA_1903	0	0
CGGA_903	0	1
CGGA_P179	0	1
CGGA_P173	0	1
CGGA_P177	0	1
CGGA_1565	0	1
CGGA_1569	0	0
CGGA_1097	1	1
CGGA_P271	0	2
CGGA_1155	0	0
CGGA_1743	0	1
CGGA_703	1	1
CGGA_P279	0	0
CGGA_1607	1	0
CGGA_1033	0	1
CGGA_279	1	1
CGGA_1880	0	1
CGGA_720	0	1
CGGA_809	0	1
CGGA_P311	1	1
CGGA_P314	0	0
CGGA_1994	0	1
CGGA_1533	1	1
CGGA_P326	0	1
CGGA_1655	0	1
CGGA_1696	0	2
CGGA_P338	0	1
CGGA_1477	0	1
CGGA_103	0	1
CGGA_1497	0	1
CGGA_P358	0	1
CGGA_J73	0	2
CGGA_1591	0	1
CGGA_28	0	0
CGGA_P392	0	0
CGGA_P422	0	0
CGGA_P399	0	0
CGGA_1311	0	0
CGGA_1614	0	1
CGGA_P416	0	0
CGGA_1771	0	1
CGGA_1610	1	0
CGGA_288	1	0
CGGA_1906	1	1
CGGA_1508	0	1
CGGA_P172	0	2
CGGA_1437	0	1
CGGA_P437	0	0
CGGA_P438	0	0
CGGA_P439	0	1
CGGA_P446	0	0
CGGA_882	0	1
CGGA_1524	0	0
CGGA_1058	1	1
CGGA_P468	0	0
CGGA_1309	0	0
CGGA_2079	0	0
CGGA_2081	0	0
CGGA_1716	0	1
CGGA_1356	0	1
CGGA_P492	0	0
CGGA_P500	0	0
CGGA_1205	0	2
CGGA_901	0	1
CGGA_P501	0	1
CGGA_P505	0	1
CGGA_780	0	1
CGGA_P306	0	0
CGGA_157	0	1
CGGA_P510	1	1
CGGA_861	1	1
CGGA_1383	0	0
CGGA_P520	0	0
CGGA_P147	0	1
CGGA_D28	0	1
CGGA_1791	0	2
CGGA_P163	0	1
CGGA_1651	0	1
CGGA_1536	0	1
CGGA_1567	0	1
CGGA_1051	0	0
CGGA_825	0	1
CGGA_2129	0	1
CGGA_1554	0	0
CGGA_P176	0	0
CGGA_1829	0	1
CGGA_P110	0	1
CGGA_1126	0	1
CGGA_D50	0	0
CGGA_1037	0	0
CGGA_P265	0	2
CGGA_1619	0	1
CGGA_1850	0	1
CGGA_1587	0	1
CGGA_1686	1	1
CGGA_1185	1	1
CGGA_1157	0	1
CGGA_1066	1	1
CGGA_1048	0	1
CGGA_1321	0	1
CGGA_1087	0	0
CGGA_P337	0	0
CGGA_1108	1	1
CGGA_1223	1	1
CGGA_P633	0	1
CGGA_1226	0	1
CGGA_888	0	0
CGGA_P286	0	0
CGGA_492	1	1
CGGA_1032	0	2
CGGA_2006	0	1
CGGA_P461	0	1
CGGA_P165	0	2
CGGA_1148	1	1
CGGA_1680	0	1
CGGA_P328	1	1
CGGA_2002	1	1
CGGA_P356	0	1
CGGA_P316	0	1
CGGA_1598	1	1
CGGA_P308	0	1
CGGA_1398	0	1
CGGA_810	1	1
CGGA_619	1	1
CGGA_1553	0	1
CGGA_P346	1	1
CGGA_1487	1	1
CGGA_1693	0	1
CGGA_1739	1	1
CGGA_521	0	1
CGGA_P269	1	0
CGGA_P319	0	1
CGGA_1459	1	1
CGGA_P185	0	1
CGGA_P364	1	1
CGGA_1594	0	1
CGGA_1195	1	1
CGGA_652	0	1
CGGA_1606	0	1
CGGA_P157	1	1
CGGA_1738	1	1
CGGA_1760	1	1
CGGA_P315	0	1
CGGA_1141	0	1
CGGA_1120	0	2
CGGA_1178	0	1
CGGA_P27	0	1
CGGA_1518	0	1
CGGA_1183	0	1
CGGA_P30	1	1
CGGA_P23	0	2
CGGA_P18	0	1
CGGA_P5	1	1
CGGA_P508	0	1
CGGA_1154	1	1
CGGA_867	1	1
CGGA_108	1	1
CGGA_1670	1	1
CGGA_1369	0	1
CGGA_2121	1	1
CGGA_1568	0	1
CGGA_1359	1	1
CGGA_1809	0	1
CGGA_1589	0	1
CGGA_1427	0	1
CGGA_1474	0	2
CGGA_763	0	1
CGGA_1181	0	1
CGGA_P98	0	1
CGGA_1295	1	1
CGGA_P145	0	1
CGGA_1447	0	2
CGGA_P421	1	1
CGGA_1002	0	1
CGGA_507	0	1
CGGA_P483	0	1
CGGA_D19	0	0
CGGA_1747	0	1
CGGA_P388	1	1
CGGA_1510	1	1
CGGA_1473	0	1
CGGA_1014	0	1
CGGA_P604	0	1
CGGA_P266	0	2
CGGA_881	1	1
CGGA_2046	1	1
CGGA_1010	0	2
CGGA_P181	1	1
CGGA_1685	0	1
CGGA_P310	0	0
CGGA_P568	0	0
CGGA_1101	0	2
CGGA_P159	1	1
CGGA_1544	0	1
CGGA_165	0	1
CGGA_852	1	1
CGGA_P104	0	2
CGGA_1184	0	1
CGGA_1334	1	1
CGGA_2013	1	0
CGGA_1669	1	1
CGGA_554	0	1
CGGA_1575	1	1
CGGA_1458	0	0
CGGA_358	0	1
CGGA_1862	0	1
CGGA_P29	0	2
CGGA_406	0	1
CGGA_P594	1	1
CGGA_1514	0	2
CGGA_457	1	1
CGGA_1434	1	1
CGGA_1688	0	1
