# Supplementary material for: Development of a Metabolic Subtype Classifier for Low- Grade Glioma to Guide Precision Therapy
Source: Research Square preprint supplement (doi:10.21203/rs.3.rs-7778086/v1), 2025-12-16
Supplement: Supplementary file 32 [file data.xlsx]

## Sheet: Sheet1
id	group	Response
E08021_U133P2	1	1
E09239_U133P2	0	0
E09296_U133P2	0	0
E09334_U133P2	0	1
E09358_U133P2	1	1
E09393_U133P2	1	1
E09394_U133P2	1	1
E09398_U133P2	1	1
E09408_U133P2	1	1
E09419_U133P2	1	1
E09440_U133P2	1	1
E09448_U133P2	1	0
E09471_U133P2	1	1
E09503_U133P2	1	0
E09511_U133P2	0	0
E09542_U133P2	1	1
E09656_U133P2	0	0
E09661_U133P2	0	1
E09673_U133P2	1	0
E09681_U133P2	1	1
E09688_U133P2	1	1
E09699_U133P2	1	1
E09743_U133P2	1	1
E09755_U133P2	1	1
E09797_U133P2	0	0
E09801_U133P2	0	1
E09804_U133P2	1	1
E09811_U133P2	1	1
E09826_U133P2	0	0
E09855_U133P2	1	0
E09860_U133P2	1	1
E09867_U133P2	1	1
E09890_U133P2	1	1
E09893_U133P2	1	0
E09914_U133P2	1	1
E09920_U133P2_2	1	0
E09937_U133P2	1	1
E09948_U133P2	0	1
E09949_U133P2	1	1
E09959_U133P2	1	0
E09966_U133P2	0	0
E09988_U133P2	1	0
E10001_U133P2	1	0
E10011_U133P2	1	0
E10021_U133P2	1	0
E10025_U133P2	1	1
E10054_U133P2	1	1
E10062_U133P2	1	0
E10105_U133P2	0	0
E10162_U133P2	0	0
E10483_U133P2	0	0
E10615_U133P2	1	1
E10645_U133P2	1	0
HF0017_U133P2	1	1
HF0022_U133P2	1	1
HF0026_U133P2	1	1
HF0087_U133P2	1	1
HF0089_U133P2	0	1
HF0108_U133P2	1	0
HF0152_U133P2	1	1
HF0183_U133P2	1	1
HF0184_U133P2	0	0
HF0218_U133P2	1	1
HF0223_U133P2	1	1
HF0244_U133P2	1	1
HF0251_U133P2	1	0
HF0252_U133P2_2	1	1
HF0285_U133P2	1	1
HF0291_U133P2	1	1
HF0305_U133P2	1	1
HF0316_U133P2	0	1
HF0327_U133P2	0	0
HF0329_U133P2	1	1
HF0332_U133P2	1	1
HF0434_U133P2	1	0
HF0435_U133P2	1	1
HF0450_U133P2	0	1
HF0460_U133P2	0	0
HF0488_U133P2	1	1
HF0491_U133P2	1	1
HF0510_U133P2	0	0
HF0599_U133P2	1	1
HF0606_U133P2	1	1
HF0608_U133P2	0	0
HF0639_U133P2	1	1
HF0670_U133P2	1	0
HF0702_U133P2	0	0
HF0726_U133P2	1	1
HF0757_U133P2	0	0
HF0778_U133P2	1	1
HF0802_U133P2	1	1
HF0816_U133P2	0	0
HF0822_U133P2	1	1
HF0828_U133P2	1	1
HF0835_U133P2	1	1
HF0844_U133P2	1	1
HF0850_U133P2	0	0
HF0855_U133P2	1	0
HF0897_U133P2	1	0
HF0899_U133P2	1	1
HF0914_U133P2	1	1
HF0920_U133P2	1	1
HF0931_U133P2	1	1
HF0936_U133P2	1	0
HF0953_U133P2_2	0	0
HF0954.2_U133P2	0	0
HF0960_U133P2	1	1
HF0962_U133P2	1	1
HF0966_U133P2	1	1
HF0975_U133P2	1	1
HF0982_U133P2	0	0
HF1000_U133P2	1	1
HF1032_U133P2	1	1
HF1057_U133P2	0	0
HF1090_U133P2	0	0
HF1136_U133P2	1	0
HF1150_U133P2	0	1
HF1156_U133P2	1	1
HF1167_U133P2	0	0
HF1185_U133P2	0	0
HF1186_U133P2	1	1
HF1227_U133P2	1	0
HF1232_U133P2	0	1
HF1235_U133P2	1	1
HF1242_U133P2	0	0
HF1246_U133P2	1	0
HF1255_U133P2	0	1
HF1280_U133P2	0	0
HF1286_U133P2	0	1
HF1295_U133P2	1	1
HF1316_U133P2	0	1
HF1319_U133P2	1	1
HF1325_U133P2	1	1
HF1334_U133P2	1	0
HF1344_U133P2	0	0
HF1345_U133P2	0	0
HF1357_U133P2	1	1
HF1366_U133P2	0	0
HF1380_U133P2	1	1
HF1381_U133P2	1	1
HF1407_U133P2	0	1
HF1409_U133P2	0	0
HF1442_U133P2	1	1
HF1458_U133P2	0	0
HF1475_U133P2	1	1
HF1487_U133P2	0	0
HF1489_U133P2	1	1
HF1490_U133P2	0	0
HF1493_U133P2	1	0
HF1494_U133P2	1	1
HF1502_U133P2	1	1
HF1511_U133P2	1	1
HF1551_U133P2	1	1
HF1568_U133P2	1	1
HF1581_U133P2	1	0
HF1587_U133P2	1	1
HF1588_U133P2	1	1
HF1606_U133P2	1	1
HF1613_U133P2	1	0
HF1677_U133P2	1	1
HF1702_U133P2	0	0
HF1708_U133P2	1	1
