# Supplementary material for: Development of a Metabolic Subtype Classifier for Low- Grade Glioma to Guide Precision Therapy
Source: Research Square preprint supplement (doi:10.21203/rs.3.rs-7778086/v1), 2025-12-16
Supplement: Supplementary file 34 [file cck8.xlsx]

## Sheet: 0H
软件版本	3.11.19
程序详细信息
板类型	96 WELL PLATE
完成后弹出板
检测	吸收光 终点
	全板
	波长: 450
	检测速度: 正常, 延迟: 100 msec, 测量值/数据点: 8
结果
实际温度:	24.2
				H-NC	H-si1	H-si2	S-NC	S-si1	S-si2
		1	2	3	4	5	6	7	8	9	10	11	12
	A	0.05	0.041	0.047	0.046	0.048	0.046	0.047	0.047	0.048	0.046	0.046	0.047	450
	B	0.039	0.042	0.043	0.044	0.043	0.042	0.042	0.042	0.043	0.042	0.042	0.042	450
	C	0.04	0.044	0.042	0.042	0.042	0.042	0.042	0.042	0.045	0.042	0.043	0.044	450
	D	0.04	0.046	0.737	1.067	0.824	0.297	0.266	0.282	0.044	0.043	0.043	0.043	450
	E	0.04	0.065	0.789	1.109	0.805	0.286	0.257	0.291	0.047	0.046	0.043	0.046	450
	F	0.043	0.044	0.871	1.067	1.059	0.321	0.269	0.287	0.046	0.045	0.043	0.043	450
	G	0.05	0.049	0.041	0.042	0.042	0.042	0.042	0.041	0.049	0.043	0.043	0.047	450
	H	0.05	0.046	0.041	0.177	0.05	0.05	0.048	0.049	0.047	0.043	0.044	0.045	450
				0.737	1.067	0.824	0.297	0.266	0.282
				0.789	1.109	0.805	0.286	0.257	0.291
				0.871	1.067	1.059	0.321	0.269	0.287
				0.799	1.081	0.896	0.301333	0.264	0.286667
				0.922403	0.987049	0.919643	0.985619	1.00758	0.983721
				0.987484	1.0259	0.898438	0.949115	0.973485	1.01512
				1.09011	0.987049	1.18192	1.06527	1.01894	1.00116

## Sheet: 24H
软件版本	3.11.19
程序详细信息
板类型	96 WELL PLATE
完成后弹出板
检测	吸收光 终点
	全板
	波长: 450
	检测速度: 正常, 延迟: 100 msec, 测量值/数据点: 8
结果
实际温度:	24.5
				H-NC	H-si1	H-si2	S-NC	S-si1	S-si2
		1	2	3	4	5	6	7	8	9	10	11	12
	A	0.043	0.048	0.046	0.046	0.046	0.045	0.045	0.045	0.047	0.046	0.047	0.044	450
	B	0.043	0.044	0.043	0.042	0.042	0.042	0.042	0.042	0.042	0.043	0.043	0.045	450
	C	0.042	0.043	0.043	0.042	0.041	0.042	0.042	0.042	0.042	0.043	0.042	0.043	450
	D	0.043	0.044	1.477	1.643	1.052	0.443	0.309	0.308	0.043	0.043	0.043	0.041	450
	E	0.043	0.046	1.429	1.503	1.036	0.479	0.315	0.351	0.041	0.043	0.044	0.043	450
	F	0.042	0.042	1.381	1.291	0.942	0.434	0.295	0.297	0.042	0.043	0.042	0.041	450
	G	0.044	0.044	0.041	0.042	0.042	0.043	0.042	0.044	0.042	0.044	0.042	0.041	450
	H	0.045	0.043	0.041	0.046	0.05	0.05	0.048	0.049	0.039	0.045	0.043	0.042	450
				1.477	1.643	1.052	0.443	0.309	0.308
				1.429	1.503	1.036	0.479	0.315	0.351
				1.381	1.291	0.942	0.434	0.295	0.297
				0.799	1.081	0.896	0.301333	0.264	0.286333
				1.84856	1.51989	1.17411	1.47013	1.17045	1.07567
				1.78849	1.39038	1.15625	1.5896	1.19318	1.22584
				1.72841	1.19426	1.05134	1.44027	1.11742	1.03725

## Sheet: 48H
软件版本	3.11.19
程序详细信息
板类型	96 WELL PLATE
完成后弹出板
检测	吸收光 终点
	全板
	波长: 450
	检测速度: 正常, 延迟: 100 msec, 测量值/数据点: 8
结果
实际温度:	24.9
				H-NC	H-si1	H-si2	S-NC	S-si1	S-si2
		1	2	3	4	5	6	7	8	9	10	11	12
	A	0.041	0.049	0.045	0.045	0.045	0.045	0.043	0.044	0.046	0.046	0.041	0.044	450
	B	0.042	0.042	0.042	0.042	0.041	0.041	0.041	0.041	0.041	0.042	0.042	0.042	450
	C	0.042	0.044	0.042	0.041	0.042	0.043	0.042	0.042	0.042	0.043	0.043	0.045	450
	D	0.042	0.042	1.683	1.608	1.023	0.551	0.361	0.324	0.043	0.04	0.043	0.044	450
	E	0.044	0.043	1.677	1.691	1.052	0.494	0.403	0.348	0.041	0.04	0.044	0.047	450
	F	0.041	0.046	1.717	1.695	1.158	0.511	0.333	0.363	0.042	0.043	0.044	0.046	450
	G	0.043	0.045	0.041	0.042	0.043	0.042	0.042	0.041	0.042	0.045	0.045	0.05	450
	H	0.042	0.045	0.044	0.044	0.044	0.044	0.044	0.044	0.043	0.047	0.045	0.048	450
				1.683	1.608	1.023	0.551	0.361	0.324
				1.677	1.691	1.052	0.494	0.403	0.348
				1.717	1.695	1.158	0.511	0.333	0.363
				0.799	1.081	0.896	0.301333	0.264	0.286333
				2.10638	1.48751	1.14174	1.82854	1.36742	1.13155
				2.09887	1.56429	1.17411	1.63938	1.52652	1.21537
				2.14894	1.56799	1.29241	1.6958	1.26136	1.26775

## Sheet: 72H
软件版本	3.11.19
程序详细信息
板类型	96 WELL PLATE
完成后弹出板
检测	吸收光 终点
	全板
	波长: 450
	检测速度: 正常, 延迟: 100 msec, 测量值/数据点: 8
结果
实际温度:	24.3
				H-NC	H-si1	H-si2	S-NC	S-si1	S-si2
		1	2	3	4	5	6	7	8	9	10	11	12
	A	0.041	0.044	0.046	0.047	0.047	0.047	0.047	0.047	0.046	0.047	0.043	0.045	450
	B	0.041	0.042	0.043	0.043	0.043	0.042	0.042	0.042	0.044	0.042	0.043	0.043	450
	C	0.044	0.044	0.042	0.042	0.042	0.042	0.042	0.042	0.044	0.043	0.045	0.048	450
	D	0.041	0.043	2.067	1.784	1.221	0.601	0.431	0.397	0.043	0.04	0.048	0.046	450
	E	0.042	0.045	2.098	1.882	1.131	0.572	0.446	0.341	0.044	0.04	0.045	0.048	450
	F	0.042	0.044	1.987	1.747	1.323	0.612	0.439	0.351	0.043	0.043	0.064	0.046	450
	G	0.043	0.046	0.041	0.042	0.042	0.042	0.042	0.041	0.045	0.041	0.045	0.048	450
	H	0.043	0.043	0.041	0.177	0.05	0.05	0.048	0.049	0.045	0.039	0.051	0.047	450
				2.067	1.784	1.221	0.601	0.431	0.397
				2.098	1.882	1.131	0.572	0.446	0.341
				1.987	1.747	1.323	0.612	0.439	0.351
				0.799	1.081	0.896	0.301333	0.264	0.286333
				2.58698	1.65032	1.36272	1.99447	1.63258	1.3865
				2.62578	1.74098	1.26228	1.89823	1.68939	1.19092
				2.48686	1.6161	1.47656	2.03097	1.66288	1.22584
