# Supplementary material for: Development of a Metabolic Subtype Classifier for Low- Grade Glioma to Guide Precision Therapy
Source: Research Square preprint supplement (doi:10.21203/rs.3.rs-7778086/v1), 2025-12-16
Supplement: Supplementary file 36 [file CT-gene-screening.xlsx]

## Sheet: CT
Experiment: 20250523-TYQ Selected Filter: SYBR Green I / HRM Dye (465-510)
Include	Name	Cp	内参平均值	△CT	△CT均值	△△CT	2^-△△CT
TRUE	SVGP12-1-ACTIN	16.19	16.24
TRUE	SVGP12-1-ACTIN	16.25
TRUE	SVGP12-1-ACTIN	16.23
TRUE	SVGP12-1-ACTIN	16.29
TRUE	SVGP12-1-GLMP	21.49	16.24	5.25	5.2475	0.0025	0.998269		0.998269	0.998269	1.0122	0.991373	0.994815	0.987943	1.0087	1.0087	0.99654	1.01045	0.99654	0.99654	1.03526	0.965936	1.05702	0.946058
TRUE	SVGP12-1-GLMP	21.49	16.24	5.25	5.2475	0.0025	0.998269
TRUE	SVGP12-1-GLMP	21.47	16.24	5.23	5.2475	-0.0175	1.0122
TRUE	SVGP12-1-GLMP	21.5	16.24	5.26	5.2475	0.0125	0.991373
TRUE	SVGP12-1-MCUB	19.72	16.24	3.48	3.4725	0.0075	0.994815
TRUE	SVGP12-1-MCUB	19.73	16.24	3.49	3.4725	0.0175	0.987943
TRUE	SVGP12-1-MCUB	19.7	16.24	3.46	3.4725	-0.0125	1.0087
TRUE	SVGP12-1-MCUB	19.7	16.24	3.46	3.4725	-0.0125	1.0087
TRUE	SVGP12-1-TAGLN2	18.99	16.24	2.75	2.745	0.005	0.99654
TRUE	SVGP12-1-TAGLN2	18.97	16.24	2.73	2.745	-0.015	1.01045
TRUE	SVGP12-1-TAGLN2	18.99	16.24	2.75	2.745	0.005	0.99654
TRUE	SVGP12-1-TAGLN2	18.99	16.24	2.75	2.745	0.005	0.99654
TRUE	SVGP12-1-SNAP91	30.27	16.24	14.03	14.08	-0.05	1.03526
TRUE	SVGP12-1-SNAP91	30.37	16.24	14.13	14.08	0.05	0.965936
TRUE	SVGP12-1-SNAP91	30.24	16.24	14	14.08	-0.08	1.05702
TRUE	SVGP12-1-SNAP91	30.4	16.24	14.16	14.08	0.08	0.946058
TRUE	Hs683-1-ACTIN	15.45	15.48
TRUE	Hs683-1-ACTIN	15.48
TRUE	Hs683-1-ACTIN	15.45
TRUE	Hs683-1-ACTIN	15.54
TRUE	Hs683-1-GLMP	20.59	15.48	5.11	5.2475	-0.1375	1.1		1.1	1.07736	1.0924	1.08485	1.17487	1.2079	1.2163	1.24186	2.04911	2.07772	2.09217	2.07772	0.812252	0.806642	0.840896	0.858565
TRUE	Hs683-1-GLMP	20.62	15.48	5.14	5.2475	-0.1075	1.07736
TRUE	Hs683-1-GLMP	20.6	15.48	5.12	5.2475	-0.1275	1.0924
TRUE	Hs683-1-GLMP	20.61	15.48	5.13	5.2475	-0.1175	1.08485
TRUE	Hs683-1-MCUB	18.72	15.48	3.24	3.4725	-0.2325	1.17487
TRUE	Hs683-1-MCUB	18.68	15.48	3.2	3.4725	-0.2725	1.2079
TRUE	Hs683-1-MCUB	18.67	15.48	3.19	3.4725	-0.2825	1.2163
TRUE	Hs683-1-MCUB	18.64	15.48	3.16	3.4725	-0.3125	1.24186
TRUE	Hs683-1-TAGLN2	17.19	15.48	1.71	2.745	-1.035	2.04911
TRUE	Hs683-1-TAGLN2	17.17	15.48	1.69	2.745	-1.055	2.07772
TRUE	Hs683-1-TAGLN2	17.16	15.48	1.68	2.745	-1.065	2.09217
TRUE	Hs683-1-TAGLN2	17.17	15.48	1.69	2.745	-1.055	2.07772
TRUE	Hs683-1-SNAP91	29.86	15.48	14.38	14.08	0.3	0.812252
TRUE	Hs683-1-SNAP91	29.87	15.48	14.39	14.08	0.31	0.806642
TRUE	Hs683-1-SNAP91	29.81	15.48	14.33	14.08	0.25	0.840896
TRUE	Hs683-1-SNAP91	29.78	15.48	14.3	14.08	0.22	0.858565
TRUE	SW1088-2-ACTIN	17.78	17.7825
TRUE	SW1088-2-ACTIN	17.78
TRUE	SW1088-2-ACTIN	17.78
TRUE	SW1088-2-ACTIN	17.79
TRUE	SW1088-2-GLMP	22.59	17.7825	4.8075	5.2475	-0.44	1.3566		1.3566	1.29235	1.31951	1.34723	1.14472	1.1607	1.13682	1.14472	2.42419	2.40744	2.30937	2.26184	0.759173	0.785945	0.733312	0.743549
TRUE	SW1088-2-GLMP	22.66	17.7825	4.8775	5.2475	-0.37	1.29235
TRUE	SW1088-2-GLMP	22.63	17.7825	4.8475	5.2475	-0.4	1.31951
TRUE	SW1088-2-GLMP	22.6	17.7825	4.8175	5.2475	-0.43	1.34723
TRUE	SW1088-2-MCUB	21.06	17.7825	3.2775	3.4725	-0.195	1.14472
TRUE	SW1088-2-MCUB	21.04	17.7825	3.2575	3.4725	-0.215	1.1607
TRUE	SW1088-2-MCUB	21.07	17.7825	3.2875	3.4725	-0.185	1.13682
TRUE	SW1088-2-MCUB	21.06	17.7825	3.2775	3.4725	-0.195	1.14472
TRUE	SW1088-2-TAGLN2	19.25	17.7825	1.4675	2.745	-1.2775	2.42419
TRUE	SW1088-2-TAGLN2	19.26	17.7825	1.4775	2.745	-1.2675	2.40744
TRUE	SW1088-2-TAGLN2	19.32	17.7825	1.5375	2.745	-1.2075	2.30937
TRUE	SW1088-2-TAGLN2	19.35	17.7825	1.5675	2.745	-1.1775	2.26184
TRUE	SW1088-2-SANP91	32.26	17.7825	14.4775	14.08	0.3975	0.759173
TRUE	SW1088-2-SANP91	32.21	17.7825	14.4275	14.08	0.3475	0.785945
TRUE	SW1088-2-SANP91	32.31	17.7825	14.5275	14.08	0.4475	0.733312
TRUE	SW1088-2-SANP91	32.29	17.7825	14.5075	14.08	0.4275	0.743549
