# Supplementary material for: Development of a Metabolic Subtype Classifier for Low- Grade Glioma to Guide Precision Therapy
Source: Research Square preprint supplement (doi:10.21203/rs.3.rs-7778086/v1), 2025-12-16
Supplement: Supplementary file 38 [file CT-si-validation.xlsx]

## Sheet: CT
Experiment: 20250529-TYQ Selected Filter: SYBR Green I / HRM Dye (465-510)
Include	Name	Cp	内参平均值	△CT	△CT均值	△△CT	2^-△△CT
TRUE	H-siNC-GAPDH	14.89	14.9125
TRUE	H-siNC-GAPDH	14.94
TRUE	H-siNC-GAPDH	14.9
TRUE	H-siNC-GAPDH	14.92
TRUE	H-siNC-TAGLN2	18.83	14.9125	3.9175	3.935	-0.0175	1.0122
TRUE	H-siNC-TAGLN2	18.83	14.9125	3.9175	3.935	-0.0175	1.0122
TRUE	H-siNC-TAGLN2	18.86	14.9125	3.9475	3.935	0.0125	0.991373
TRUE	H-siNC-TAGLN2	18.87	14.9125	3.9575	3.935	0.0225	0.984525
TRUE	H-si-1-GAPDH	14.28	14.265
TRUE	H-si-1-GAPDH	14.32
TRUE	H-si-1-GAPDH	14.21
TRUE	H-si-1-GAPDH	14.25
TRUE	H-si-1-TAGLN2	20.72	14.265	6.455	3.935	2.52	0.174343
TRUE	H-si-1-TAGLN2	20.77	14.265	6.505	3.935	2.57	0.168404
TRUE	H-si-1-TAGLN2	20.69	14.265	6.425	3.935	2.49	0.178006
TRUE	H-si-1-TAGLN2	20.7	14.265	6.435	3.935	2.5	0.176777
TRUE	H-si-2-GAPDH	14.95	14.9725
TRUE	H-si-2-GAPDH	14.98
TRUE	H-si-2-GAPDH	14.99
TRUE	H-si-2-GAPDH	14.97
TRUE	H-si-2-TAGLN2	21.21	14.9725	6.2375	3.935	2.3025	0.202712
TRUE	H-si-2-TAGLN2	21.21	14.9725	6.2375	3.935	2.3025	0.202712
TRUE	H-si-2-TAGLN2	21.19	14.9725	6.2175	3.935	2.2825	0.205541
TRUE	H-si-2-TAGLN2	21.17	14.9725	6.1975	3.935	2.2625	0.208411
TRUE	S-siNC-GAPDH	14.13	14.1475
TRUE	S-siNC-GAPDH	14.16
TRUE	S-siNC-GAPDH	14.16
TRUE	S-siNC-GAPDH	14.14
TRUE	S-siNC-TAGLN2	16.17	14.1475	2.0225	2.035	-0.0125	1.0087
TRUE	S-siNC-TAGLN2	16.19	14.1475	2.0425	2.035	0.0075	0.994815
TRUE	S-siNC-TAGLN2	16.19	14.1475	2.0425	2.035	0.0075	0.994815
TRUE	S-siNC-TAGLN2	16.18	14.1475	2.0325	2.035	-0.0025	1.00173
TRUE	S-si-1-GAPDH	14.99	14.96
TRUE	S-si-1-GAPDH	14.94
TRUE	S-si-1-GAPDH	14.97
TRUE	S-si-1-GAPDH	14.94
TRUE	S-si-1-TAGLN2	18.29	14.96	3.33	2.035	1.295	0.407536
TRUE	S-si-1-TAGLN2	18.28	14.96	3.32	2.035	1.285	0.410371
TRUE	S-si-1-TAGLN2	18.28	14.96	3.32	2.035	1.285	0.410371
TRUE	S-si-1-TAGLN2	18.3	14.96	3.34	2.035	1.305	0.404721
TRUE	S-si-2-GAPDH	14.47	14.51
TRUE	S-si-2-GAPDH	14.52
TRUE	S-si-2-GAPDH	14.51
TRUE	S-si-2-GAPDH	14.54
TRUE	S-si-2-TAGLN2	17.75	14.51	3.24	2.035	1.205	0.433769
TRUE	S-si-2-TAGLN2	17.73	14.51	3.22	2.035	1.185	0.439825
TRUE	S-si-2-TAGLN2	17.74	14.51	3.23	2.035	1.195	0.436786
TRUE	S-si-2-TAGLN2	17.74	14.51	3.23	2.035	1.195	0.436786
