# Supplementary material for: Development of a Metabolic Subtype Classifier for Low- Grade Glioma to Guide Precision Therapy
Source: Research Square preprint supplement (doi:10.21203/rs.3.rs-7778086/v1), 2025-12-16
Supplement: Supplementary file 40 [file scratch.xlsx]

## Sheet: Sheet1
SW1088	siNC				si1			si2
	650	638	632		652	652	670	582	600	594
	474	420	466		544	604	612	532	536	532
	27.0769	34.1693	26.2658		16.5644	7.36196	8.65672	8.59107	10.6667	10.4377
HS683	siNC				si1			si2
	742	714	700		642	626	642	710	710	718
	388	378	324		526	496	534	600	588	562
	47.7089	47.0588	53.7143		18.0685	20.7668	16.8224	15.493	17.1831	21.727
		27.0769			47.7089
		34.1693			47.0588
		26.2658			53.7143
		16.5644			18.0685
		7.36196			20.7668
		8.65672			16.8224
		8.59107			15.493
		10.6667			17.1831
		10.4377			21.727
