# Supplementary material for: Development of a Metabolic Subtype Classifier for Low- Grade Glioma to Guide Precision Therapy
Source: Research Square preprint supplement (doi:10.21203/rs.3.rs-7778086/v1), 2025-12-16
Supplement: Supplementary file 42 [file data.xlsx]

## Sheet: Sheet1
ID	group	Response
TCGA-S9-A6WD	1	0
TCGA-DH-5140	1	1
TCGA-HT-7693	1	1
TCGA-FG-5964	1	0
TCGA-HW-8319	1	0
TCGA-FG-7637	1	0
TCGA-VM-A8C9	0	0
TCGA-S9-A7IS	1	0
TCGA-HT-7684	1	1
TCGA-KT-A74X	1	0
TCGA-DU-7302	1	0
TCGA-HT-8018	1	0
TCGA-DU-7007	0	1
TCGA-S9-A6U9	1	1
TCGA-HT-8110	0	0
TCGA-TM-A84I	1	0
TCGA-HT-7902	1	0
TCGA-DB-5281	1	0
TCGA-DU-7013	0	1
TCGA-VM-A8CF	1	1
TCGA-DU-8162	1	1
TCGA-IK-7675	1	0
TCGA-DU-7019	1	1
TCGA-R8-A6MK	1	0
TCGA-DU-A7TJ	0	1
TCGA-DB-A64R	1	0
TCGA-HW-7487	1	1
TCGA-S9-A7J0	1	0
TCGA-DU-8163	1	1
TCGA-DU-6400	1	0
TCGA-TM-A7C5	1	0
TCGA-HT-7472	1	1
TCGA-TM-A84B	0	1
TCGA-HT-7609	1	1
TCGA-R8-A73M	1	0
TCGA-HT-A615	1	1
TCGA-HT-7688	1	0
TCGA-DU-6408	1	0
TCGA-EZ-7264	1	0
TCGA-VM-A8C8	1	1
TCGA-DU-A5TS	1	1
TCGA-CS-6668	1	0
TCGA-TQ-A7RJ	1	1
TCGA-DU-8168	1	0
TCGA-HT-8109	1	1
TCGA-DU-5872	1	0
TCGA-HT-7873	1	0
TCGA-E1-5303	1	1
TCGA-DB-A75P	1	0
TCGA-S9-A6WG	1	0
TCGA-VM-A8CB	1	0
TCGA-HT-A5R5	1	1
TCGA-TQ-A7RF	1	0
TCGA-FG-A70Y	1	1
TCGA-E1-5319	1	1
TCGA-DH-A7UV	1	1
TCGA-DH-A669	1	1
TCGA-DB-5280	1	0
TCGA-HW-8320	1	1
TCGA-DB-A64L	1	1
TCGA-CS-4944	1	0
TCGA-HT-7469	0	0
TCGA-FG-6690	1	1
TCGA-TQ-A7RM	1	0
TCGA-DU-A5TT	0	0
TCGA-HT-7606	1	0
TCGA-P5-A77X	1	0
TCGA-HT-7874	1	1
TCGA-TM-A7C4	1	0
TCGA-S9-A7QX	1	1
TCGA-DU-5854	0	0
TCGA-TM-A84G	1	0
TCGA-DU-6405	0	0
TCGA-HT-7681	1	0
TCGA-WY-A85D	1	1
TCGA-HW-A5KL	1	1
TCGA-QH-A65X	1	0
TCGA-HT-A61C	0	0
TCGA-DU-A76O	1	1
TCGA-HT-8015	1	0
TCGA-FG-8182	1	1
TCGA-DB-5279	1	1
TCGA-E1-5307	1	1
TCGA-HT-7467	1	1
TCGA-WY-A858	1	1
TCGA-HT-A74O	1	0
TCGA-S9-A7R1	1	0
TCGA-DU-6396	1	0
TCGA-HT-7477	1	0
TCGA-HT-A618	1	0
TCGA-E1-A7YI	0	0
TCGA-DU-7301	1	0
TCGA-DH-A7UT	1	1
TCGA-HT-8558	1	1
TCGA-S9-A7J2	1	0
TCGA-HT-7879	1	1
TCGA-DU-7009	1	0
TCGA-TQ-A7RG	1	1
TCGA-S9-A89V	0	0
TCGA-RY-A83Z	1	0
TCGA-P5-A5F4	1	0
TCGA-FG-A711	1	1
TCGA-VM-A8CD	0	0
TCGA-HT-7880	1	1
TCGA-HT-A74J	1	1
TCGA-RY-A840	1	0
TCGA-TM-A84R	1	0
TCGA-DU-6403	0	0
TCGA-HT-7471	1	0
TCGA-DB-A4XA	1	0
TCGA-TM-A7CA	1	1
TCGA-DU-6393	1	0
TCGA-HT-7694	1	1
TCGA-HT-7485	1	1
TCGA-CS-5397	1	0
TCGA-DU-6401	1	1
TCGA-DU-6392	1	0
TCGA-S9-A7R8	1	1
TCGA-S9-A6WP	1	0
TCGA-S9-A6U1	1	0
TCGA-HT-7475	1	0
TCGA-E1-A7YV	1	0
TCGA-DH-5143	1	1
TCGA-S9-A6WO	1	1
TCGA-W9-A837	1	0
TCGA-DU-8166	1	1
TCGA-S9-A7IX	0	0
TCGA-FG-A60J	1	1
TCGA-QH-A65S	1	1
TCGA-DB-5274	1	0
TCGA-TQ-A7RK	1	0
TCGA-DB-A4XF	1	0
TCGA-TQ-A7RI	1	1
TCGA-P5-A781	1	1
TCGA-R8-A6MO	1	0
TCGA-HT-7854	0	0
TCGA-DB-A4XH	1	1
TCGA-VM-A8CA	1	0
TCGA-FG-7636	1	0
TCGA-QH-A6X3	1	1
TCGA-TM-A84L	1	1
TCGA-WH-A86K	1	1
TCGA-VV-A829	1	0
TCGA-DB-A4XE	1	0
TCGA-HT-7860	0	0
TCGA-DB-A75L	1	1
TCGA-TQ-A7RH	1	1
TCGA-HT-7616	1	0
TCGA-HT-8104	0	1
TCGA-S9-A7IY	1	0
TCGA-HT-7476	1	0
TCGA-DU-6394	1	0
TCGA-HT-8111	1	1
TCGA-P5-A5EU	0	0
TCGA-HT-A74H	0	0
TCGA-HT-7691	0	1
TCGA-P5-A77W	1	0
TCGA-FG-7638	1	0
TCGA-E1-A7YY	1	1
TCGA-FG-8181	1	1
TCGA-FG-A4MX	1	1
TCGA-HT-A61A	1	1
TCGA-WY-A85A	1	1
TCGA-DH-A66G	1	0
TCGA-HT-A617	0	0
TCGA-HT-A61B	1	1
TCGA-DU-A6S6	1	0
TCGA-S9-A6WH	1	1
TCGA-QH-A86X	1	0
TCGA-HT-7611	1	1
TCGA-RY-A83Y	1	0
TCGA-DU-A5TW	1	0
TCGA-FG-A713	1	1
TCGA-DH-5144	1	0
TCGA-HT-8564	1	0
TCGA-QH-A65Z	1	0
TCGA-WY-A85C	1	1
TCGA-QH-A6CZ	1	1
TCGA-E1-A7YJ	0	0
TCGA-CS-6667	1	1
TCGA-DH-A7UR	1	0
TCGA-DU-A5TP	1	0
TCGA-TM-A84O	1	0
TCGA-E1-5304	1	0
TCGA-S9-A6U0	0	0
TCGA-S9-A7QY	1	1
TCGA-FG-8187	1	1
TCGA-DU-5853	1	0
TCGA-E1-A7YM	0	0
TCGA-DB-A64P	1	0
TCGA-DB-5273	1	0
TCGA-HT-7603	1	0
TCGA-DU-7292	1	0
TCGA-S9-A6TS	1	1
TCGA-DU-A6S3	1	0
TCGA-DB-A75O	1	1
TCGA-TM-A84J	1	0
TCGA-HT-7877	1	0
TCGA-S9-A6TZ	1	1
TCGA-DU-6407	1	0
TCGA-DU-8167	1	1
TCGA-HT-8108	1	1
TCGA-QH-A65R	1	0
TCGA-TQ-A7RV	1	0
TCGA-CS-4943	1	0
TCGA-FG-A60L	1	1
TCGA-CS-6670	1	0
TCGA-P5-A72Z	1	0
TCGA-R8-A6ML	1	0
TCGA-S9-A7IZ	1	1
TCGA-TM-A84M	1	0
TCGA-FG-A87Q	0	1
TCGA-DB-A4XG	1	0
TCGA-TM-A7CF	1	1
TCGA-WY-A859	1	0
TCGA-E1-5318	1	0
TCGA-S9-A7QZ	1	0
TCGA-DB-A75M	1	1
TCGA-HT-A5R9	1	1
TCGA-FG-6688	0	1
TCGA-P5-A737	1	1
TCGA-QH-A6CW	1	1
TCGA-S9-A7R7	0	0
TCGA-DB-A64O	0	0
TCGA-HT-7474	1	0
TCGA-HT-7470	1	1
TCGA-HT-7605	1	1
TCGA-HT-8010	1	1
TCGA-DU-5852	0	0
TCGA-E1-A7YL	0	0
TCGA-FG-8188	1	1
TCGA-S9-A7R4	1	1
TCGA-WY-A85B	1	1
TCGA-DU-A6S8	1	0
TCGA-FG-A6J1	1	0
TCGA-HT-A614	1	0
TCGA-HT-8107	1	1
TCGA-KT-A7W1	0	1
TCGA-QH-A6CS	0	1
TCGA-TQ-A8XE	1	0
TCGA-DU-6399	1	0
TCGA-DU-6395	1	1
TCGA-DB-A64S	1	1
TCGA-P5-A5F0	1	0
TCGA-HW-7490	1	1
TCGA-HT-7677	1	1
TCGA-HT-7481	1	0
TCGA-FG-5965	1	0
TCGA-DB-5277	1	0
TCGA-HT-8013	1	1
TCGA-HT-7857	0	0
TCGA-F6-A8O4	1	0
TCGA-HT-A4DS	0	0
TCGA-DU-5870	1	0
TCGA-DU-A7T6	1	0
TCGA-DU-5855	1	1
TCGA-HW-8321	1	1
TCGA-P5-A72W	1	0
TCGA-FG-6691	1	1
TCGA-WY-A85E	1	0
TCGA-E1-5302	1	1
TCGA-E1-A7Z3	1	1
TCGA-HT-7686	1	1
TCGA-HT-8113	1	0
TCGA-QH-A6CX	0	1
TCGA-VW-A7QS	1	0
TCGA-DU-7300	1	0
TCGA-HT-A5R7	1	1
TCGA-S9-A6U6	1	1
TCGA-DU-6402	0	0
TCGA-HT-A5RB	1	0
TCGA-P5-A780	1	1
TCGA-E1-A7YU	1	1
TCGA-HT-7620	1	1
TCGA-DH-A7US	1	0
TCGA-E1-A7YH	1	1
TCGA-TM-A84H	1	1
TCGA-P5-A5EY	1	1
TCGA-E1-A7YO	1	0
TCGA-S9-A6TV	0	1
TCGA-HT-7480	1	0
TCGA-DH-5142	1	0
TCGA-HW-7489	1	1
TCGA-CS-6186	0	0
TCGA-FG-A4MY	1	1
TCGA-E1-A7YE	1	0
TCGA-S9-A7R3	1	1
TCGA-HT-7601	1	0
TCGA-TQ-A7RN	1	0
TCGA-HT-7689	1	1
TCGA-DU-7299	1	1
TCGA-TM-A84C	0	0
TCGA-E1-A7Z2	1	0
TCGA-HT-A4DV	1	0
TCGA-TQ-A7RP	0	0
TCGA-QH-A6X8	1	1
TCGA-P5-A5ET	1	0
TCGA-CS-5396	1	0
TCGA-QH-A6X9	1	1
TCGA-HW-7495	1	0
TCGA-RY-A843	1	1
TCGA-HT-7687	1	0
TCGA-DU-6410	1	0
TCGA-FG-7643	1	0
TCGA-FG-6689	1	1
TCGA-DU-5847	0	0
TCGA-HT-7473	1	0
TCGA-DB-A4XC	1	1
TCGA-DU-8164	1	0
TCGA-FG-A4MT	1	0
TCGA-DU-A76K	1	0
TCGA-TQ-A7RS	1	0
TCGA-DU-A6S7	1	1
TCGA-HW-A5KM	1	1
TCGA-FG-8191	1	1
TCGA-HT-7680	0	1
TCGA-VW-A8FI	0	0
TCGA-E1-A7YS	1	0
TCGA-DU-8161	0	0
TCGA-DU-A76R	1	0
TCGA-E1-5322	1	1
TCGA-CS-5394	1	0
TCGA-DB-A64X	1	0
TCGA-DU-A7TD	0	0
TCGA-P5-A5F2	1	1
TCGA-DU-7298	1	0
TCGA-DU-A7TC	1	0
TCGA-DU-A7TB	1	1
TCGA-HT-7483	1	0
TCGA-QH-A870	1	1
TCGA-R8-A6YH	1	0
TCGA-FG-6692	0	1
TCGA-DH-A66B	1	1
TCGA-RY-A83X	1	0
TCGA-P5-A731	1	0
TCGA-QH-A6X5	1	1
TCGA-CS-6666	1	0
TCGA-DU-6404	0	0
TCGA-CS-4941	0	0
TCGA-HT-7855	1	1
TCGA-DB-A4X9	1	0
TCGA-DU-6397	1	0
TCGA-DU-8158	0	0
TCGA-HT-7604	1	0
TCGA-DU-A5TY	0	0
TCGA-CS-4938	1	1
TCGA-HT-7858	1	1
TCGA-DB-5278	1	0
TCGA-DU-5871	1	1
TCGA-DB-A64V	1	0
TCGA-HT-7608	1	1
TCGA-S9-A6TX	1	0
TCGA-P5-A5EZ	1	0
TCGA-DU-7290	0	0
TCGA-HT-7856	1	1
TCGA-DU-A5TR	1	0
TCGA-DU-A7TG	1	1
TCGA-S9-A6TY	1	0
TCGA-HT-8563	0	0
TCGA-TQ-A7RO	1	1
TCGA-HT-A74L	1	1
TCGA-TQ-A7RW	1	1
TCGA-S9-A6WN	0	0
TCGA-E1-A7YK	0	1
TCGA-DU-7006	0	1
TCGA-P5-A5EV	1	1
TCGA-HW-A5KK	0	1
TCGA-DB-A64Q	1	0
TCGA-HT-A619	1	0
TCGA-FG-8186	1	1
TCGA-CS-6188	0	0
TCGA-HT-7468	1	0
TCGA-HT-7884	1	1
TCGA-E1-A7Z6	1	1
TCGA-E1-A7YD	0	1
TCGA-DU-7008	1	0
TCGA-FG-7641	1	0
TCGA-S9-A6WM	0	1
TCGA-FG-A60K	1	0
TCGA-QH-A6XA	1	1
TCGA-VM-A8CE	1	0
TCGA-P5-A72U	0	0
TCGA-CS-5390	1	0
TCGA-DB-A4XB	1	0
TCGA-DB-5270	1	1
TCGA-E1-5311	1	0
TCGA-S9-A6U8	1	1
TCGA-DU-7015	1	1
TCGA-QH-A65V	1	1
TCGA-HT-7690	1	0
TCGA-TM-A84Q	1	1
TCGA-VV-A86M	1	1
TCGA-HT-7676	1	1
TCGA-DU-7010	1	0
TCGA-HW-7486	1	1
TCGA-QH-A6X4	1	1
TCGA-S9-A6U2	1	0
TCGA-S9-A6TU	1	1
TCGA-QH-A6CV	0	0
TCGA-E1-5305	1	0
TCGA-HT-7882	0	0
TCGA-DU-5874	1	0
TCGA-S9-A6UA	0	0
TCGA-CS-4942	1	1
TCGA-DU-7018	1	0
TCGA-S9-A7J3	1	1
TCGA-FG-5963	0	0
TCGA-HT-7610	1	1
TCGA-DU-A7TA	1	0
TCGA-S9-A7R2	0	1
TCGA-P5-A5F6	0	1
TCGA-HT-A74K	1	0
TCGA-CS-5393	1	1
TCGA-FG-8189	1	1
TCGA-DU-6406	0	0
TCGA-DB-5275	1	0
TCGA-CS-5395	0	0
TCGA-FG-A6J3	0	0
TCGA-HT-7607	1	1
TCGA-DU-A5TU	1	1
TCGA-FG-A710	1	1
TCGA-TM-A84S	1	0
TCGA-S9-A6WI	1	1
TCGA-HT-7482	1	1
TCGA-DU-7306	1	1
TCGA-CS-6290	1	1
TCGA-HW-8322	1	0
TCGA-P5-A5F1	1	0
TCGA-DU-6542	1	0
TCGA-CS-6669	1	1
TCGA-S9-A6WL	1	0
TCGA-DU-A7TI	1	1
TCGA-TM-A84F	1	0
TCGA-HW-7491	1	0
TCGA-S9-A7IQ	1	0
TCGA-FG-5962	1	0
TCGA-S9-A89Z	1	0
TCGA-HT-8105	1	1
TCGA-S9-A6TW	1	0
TCGA-HT-7478	1	0
TCGA-DU-7309	1	1
TCGA-HT-8011	0	0
TCGA-RY-A845	1	0
TCGA-FG-7634	1	0
TCGA-HW-A5KJ	1	1
TCGA-DU-7014	1	0
TCGA-DU-7294	1	0
TCGA-DB-A75K	1	1
TCGA-QH-A6XC	1	0
TCGA-TQ-A7RR	1	1
TCGA-TM-A84T	1	1
TCGA-FG-A70Z	0	0
TCGA-FG-A4MW	0	0
TCGA-HT-8114	1	0
TCGA-VM-A8CH	1	1
TCGA-HT-A5RC	0	0
TCGA-S9-A7J1	1	1
TCGA-FG-A4MU	0	0
TCGA-DU-A6S2	1	1
TCGA-DU-A7T8	1	0
TCGA-DB-A4XD	1	0
TCGA-HT-7695	1	0
TCGA-DH-A7UU	1	1
TCGA-DH-A66F	1	0
TCGA-S9-A6U5	1	0
TCGA-S9-A6WQ	1	1
TCGA-DH-5141	1	1
TCGA-P5-A733	1	1
TCGA-DU-8165	0	1
TCGA-RY-A847	1	1
TCGA-P5-A735	1	0
TCGA-FG-A6IZ	1	0
TCGA-QH-A6CY	1	1
TCGA-HT-8019	1	1
TCGA-HT-7881	1	1
TCGA-E1-A7Z4	1	1
TCGA-FN-7833	1	1
TCGA-TM-A7C3	0	0
TCGA-FG-A87N	1	0
TCGA-E1-A7YW	1	1
TCGA-E1-A7YQ	0	0
TCGA-DU-A76L	0	0
TCGA-HT-7602	1	1
TCGA-HT-7692	1	1
TCGA-S9-A6UB	1	0
TCGA-HT-A5RA	0	1
TCGA-HW-7493	1	0
TCGA-S9-A7QW	1	0
TCGA-P5-A736	1	0
TCGA-P5-A5EX	0	0
TCGA-S9-A6WE	1	0
TCGA-DH-A66D	1	1
TCGA-FG-8185	1	0
TCGA-DB-A64W	1	0
TCGA-P5-A730	1	0
TCGA-DU-5849	1	0
TCGA-F6-A8O3	1	0
TCGA-P5-A5EW	1	1
TCGA-DU-7011	1	0
TCGA-HT-7479	1	1
TCGA-DB-A64U	1	0
TCGA-HT-8012	1	1
TCGA-DU-7304	1	1
TCGA-QH-A6CU	1	1
TCGA-TQ-A7RQ	1	0
TCGA-HT-A616	1	0
TCGA-IK-8125	1	0
TCGA-E1-A7YN	0	0
TCGA-HT-7875	1	0
TCGA-P5-A72X	1	0
TCGA-DU-7012	0	0
