# Supplementary material for: Development of a Metabolic Subtype Classifier for Low- Grade Glioma to Guide Precision Therapy
Source: Research Square preprint supplement (doi:10.21203/rs.3.rs-7778086/v1), 2025-12-16
Supplement: Supplementary file 44 [file 77e6ac2b1c6af6b4c7ab3912.xlsx]

## Sheet: Sheet1
Table S1 | Weight parameters between nodes in ANN model.
		Hidden layer
		Intercept	HL1	HL2	HL3	HL4
Input layer	Intercept	-	0.718576	3.66268	14.4074	1.62185
	SNAP91	-	0.016975	0.367382	-3.25698	-0.0529302
	TAGLN2	-	9.7814	-0.778782	-4.87542	-1.41435
	GLMP	-	0.00746679	0.26904	-4.38179	-0.0371737
	MCUB	-	0.00984446	0.358822	-2.74106	-0.0479948
Output layer	C1	-0.173164	-0.166989	0.479893	1.0151	-0.239369
	C2	-1.3925	1.2371	0.447765	-1.02732	1.38073
