# Supplementary material for: Development of a Metabolic Subtype Classifier for Low- Grade Glioma to Guide Precision Therapy
Source: Research Square preprint supplement (doi:10.21203/rs.3.rs-7778086/v1), 2025-12-16
Supplement: Supplementary file 46 [file pieTable1.pdf › original data_lgg&metabolism/16.ANN_validation/CGGA/8.clinical/1.clusterClipie/pieTable1.pdf]

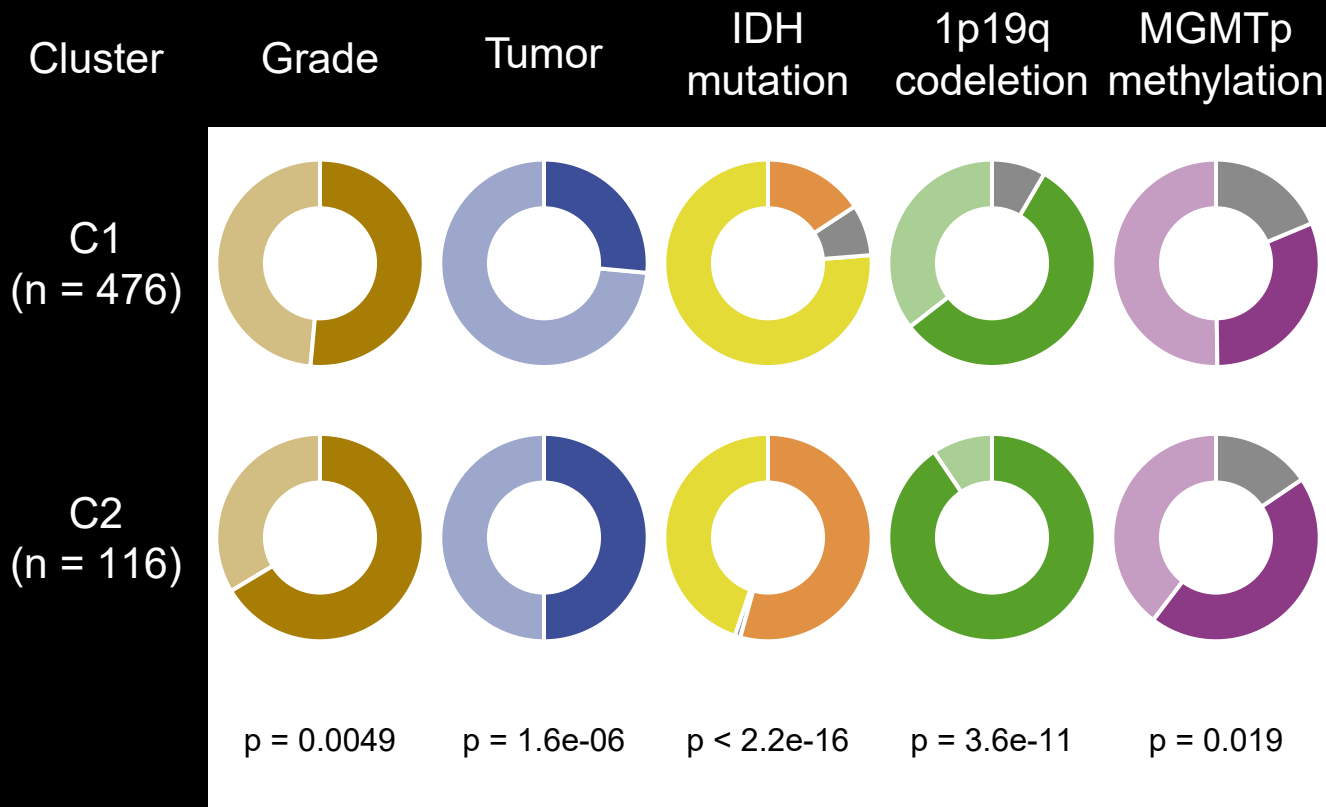

WHO\_II WHO\_III Primary Recurrent Mutant Wildtype unknow  
 Codel Non-codel unknow methylated un-methylated unknow
