# Supplementary material for: Development of a Metabolic Subtype Classifier for Low- Grade Glioma to Guide Precision Therapy
Source: Research Square preprint supplement (doi:10.21203/rs.3.rs-7778086/v1), 2025-12-16

|                   | <b>pvalue</b> | <b>Hazard ratio</b> |
|-------------------|---------------|---------------------|
| Grade             | <0.001        | 2.847(2.114–3.833)  |
| IDH_mutation      | 0.332         | 1.182(0.844–1.655)  |
| codeletion_1p19q  | <0.001        | 3.075(2.105–4.492)  |
| MGMTp_methylation | 0.399         | 1.128(0.853–1.493)  |
| metabolismcluster | 0.003         | 1.625(1.180–2.237)  |

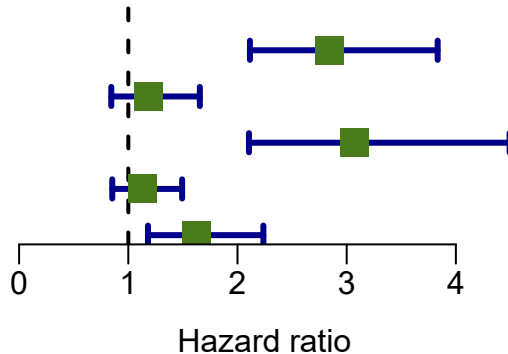

Supplement: Supplementary file 47 [file multiForest.OS.pdf › original data_lgg&metabolism/16.ANN_validation/CGGA/8.clinical/2.Cox/multiForest.OS.pdf]
