# Supplementary material for: Development of a Metabolic Subtype Classifier for Low- Grade Glioma to Guide Precision Therapy
Source: Research Square preprint supplement (doi:10.21203/rs.3.rs-7778086/v1), 2025-12-16

|                   | <b>pvalue</b> | <b>Hazard ratio</b> |
|-------------------|---------------|---------------------|
| Grade             | <0.001        | 2.866(2.221–3.697)  |
| IDH_mutation      | <0.001        | 2.272(1.765–2.924)  |
| codeletion_1p19q  | <0.001        | 3.630(2.637–4.996)  |
| MGMTp_methylation | 0.083         | 1.250(0.971–1.608)  |
| metabolismcluster | <0.001        | 2.868(2.228–3.693)  |

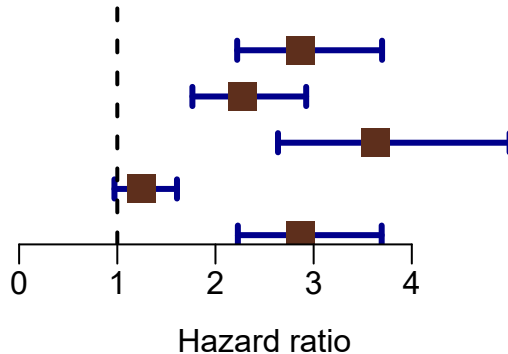

Supplement: Supplementary file 48 [file uniForest.OS.pdf › original data_lgg&metabolism/16.ANN_validation/CGGA/8.clinical/2.Cox/uniForest.OS.pdf]
