# Supplementary figures and images for: Development of a Metabolic Subtype Classifier for Low- Grade Glioma to Guide Precision Therapy
Source: Research Square preprint supplement (doi:10.21203/rs.3.rs-7778086/v1), 2025-12-16

metabolismcluster C1 C2

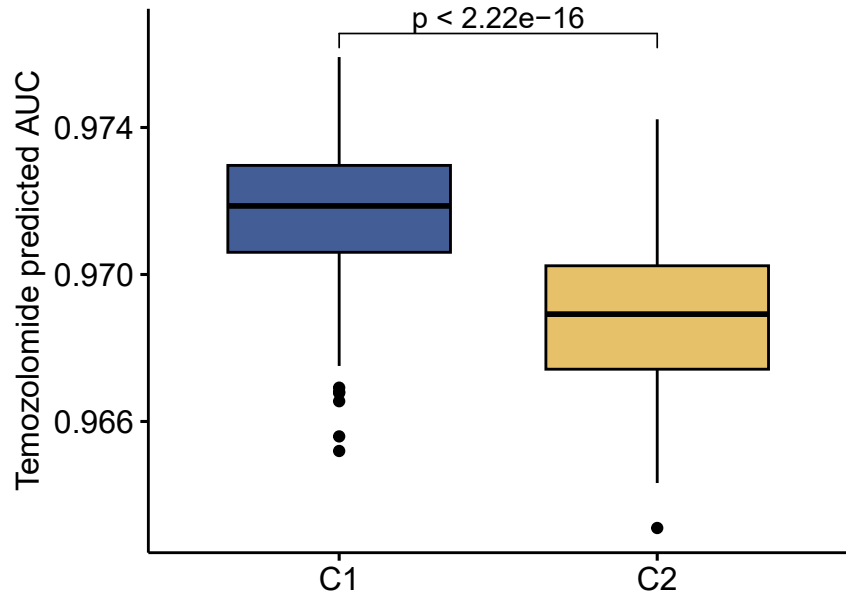

Supplement: Supplementary file 1 [file drugSenstivity.Temozolomide_AUC.pdf › original data_lgg&metabolism/10.drugsens/oncoPredict/boxplot/drugSenstivity.Temozolomide_AUC.pdf]

metabolismcluster C1 C2

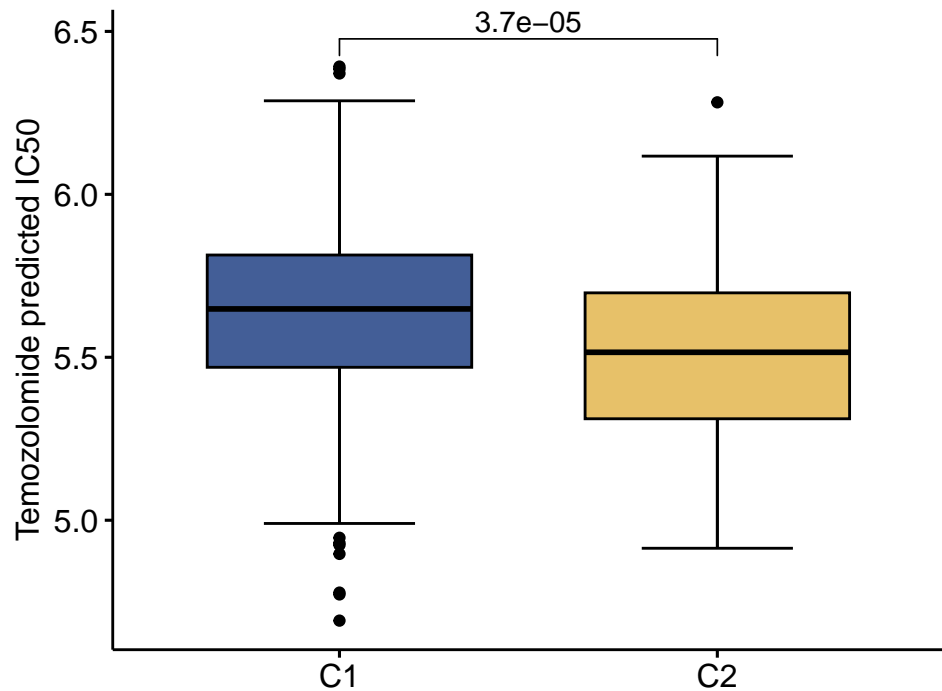

Supplement: Supplementary file 2 [file Temozolomide.pdf › original data_lgg&metabolism/10.drugsens/pRRophetic/Temozolomide.pdf]

|              | <b>pvalue</b> | <b>Hazard ratio</b> |
|--------------|---------------|---------------------|
| Age          | <0.001        | 2.489(1.606–3.857)  |
| Gender       | 0.215         | 1.273(0.869–1.863)  |
| Grade        | <0.001        | 2.353(1.508–3.670)  |
| Histological | 0.242         | 1.264(0.853–1.873)  |
| metabolism   | <0.001        | 5.221(3.359–8.114)  |

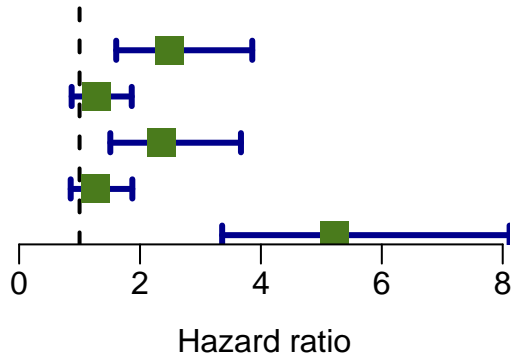

Supplement: Supplementary file 4 [file multiForest.DSS.pdf › original data_lgg&metabolism/11.clinical/2.Cox/multiForest.DSS.pdf]

|              | <b>pvalue</b> | <b>Hazard ratio</b> |
|--------------|---------------|---------------------|
| Age          | <0.001        | 2.364(1.568–3.564)  |
| Gender       | 0.191         | 1.274(0.887–1.831)  |
| Grade        | <0.001        | 2.408(1.589–3.651)  |
| Histological | 0.379         | 1.183(0.813–1.721)  |
| metabolism   | <0.001        | 5.061(3.332–7.686)  |

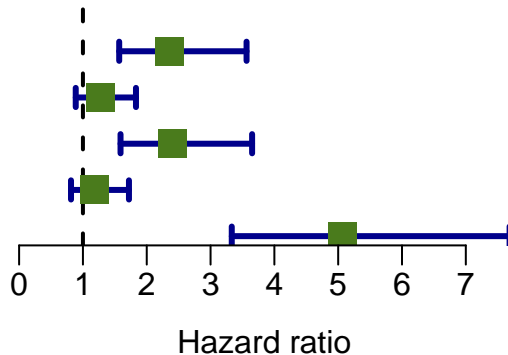

Supplement: Supplementary file 5 [file multiForest.OS.pdf › original data_lgg&metabolism/11.clinical/2.Cox/multiForest.OS.pdf]

|              | <b>pvalue</b> | <b>Hazard ratio</b> |
|--------------|---------------|---------------------|
| Age          | 0.003         | 1.599(1.174–2.178)  |
| Gender       | 0.367         | 0.877(0.659–1.167)  |
| Grade        | 0.196         | 1.227(0.900–1.675)  |
| Histological | 0.077         | 1.321(0.970–1.799)  |
| metabolism   | 0.001         | 4.039(2.816–5.795)  |

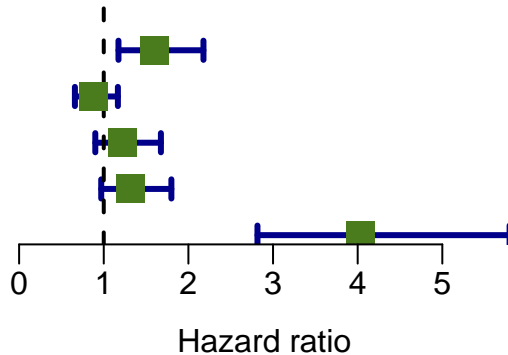

Supplement: Supplementary file 6 [file multiForest.PFI.pdf › original data_lgg&metabolism/11.clinical/2.Cox/multiForest.PFI.pdf]

|              | <b>pvalue</b> | <b>Hazard ratio</b> |
|--------------|---------------|---------------------|
| Age          | <0.001        | 3.033(2.023–4.547)  |
| Gender       | 0.715         | 1.072(0.738–1.557)  |
| Grade        | <0.001        | 3.440(2.273–5.206)  |
| Histological | 0.001         | 1.861(1.284–2.697)  |
| metabolism   | <0.001        | 7.970(5.345–11.886) |

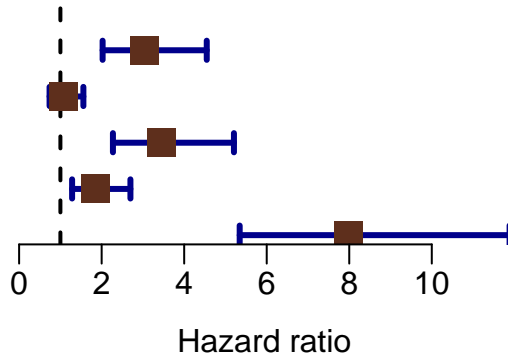

Supplement: Supplementary file 7 [file uniForest.DSS.pdf › original data_lgg&metabolism/11.clinical/2.Cox/uniForest.DSS.pdf]

|              | <b>pvalue</b> | <b>Hazard ratio</b> |
|--------------|---------------|---------------------|
| Age          | <0.001        | 2.860(1.955–4.182)  |
| Gender       | 0.629         | 1.092(0.765–1.557)  |
| Grade        | <0.001        | 3.340(2.258–4.940)  |
| Histological | 0.002         | 1.732(1.216–2.468)  |
| metabolism   | <0.001        | 7.251(4.960–10.602) |

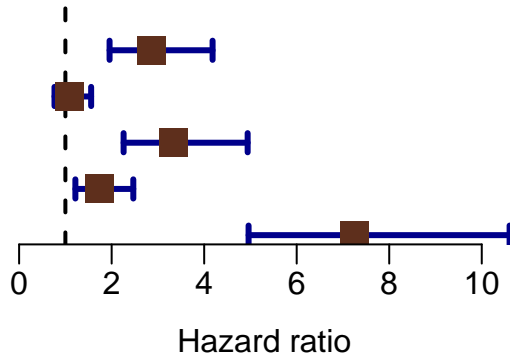

Supplement: Supplementary file 8 [file uniForest.OS.pdf › original data_lgg&metabolism/11.clinical/2.Cox/uniForest.OS.pdf]

|              | <b>pvalue</b> | <b>Hazard ratio</b> |
|--------------|---------------|---------------------|
| Age          | <0.001        | 1.923(1.436–2.574)  |
| Gender       | 0.359         | 0.875(0.658–1.164)  |
| Grade        | <0.001        | 1.656(1.238–2.215)  |
| Histological | <0.001        | 1.722(1.293–2.292)  |
| metabolism   | <0.001        | 5.261(3.792–7.300)  |

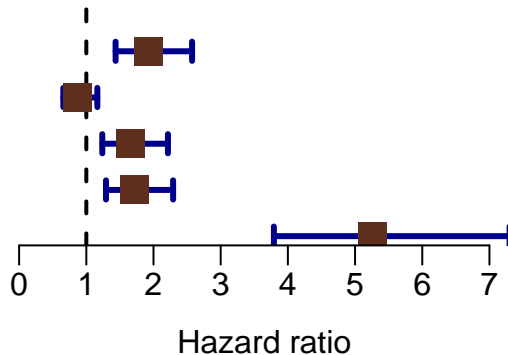

Supplement: Supplementary file 9 [file uniForest.PFI.pdf › original data_lgg&metabolism/11.clinical/2.Cox/uniForest.PFI.pdf]

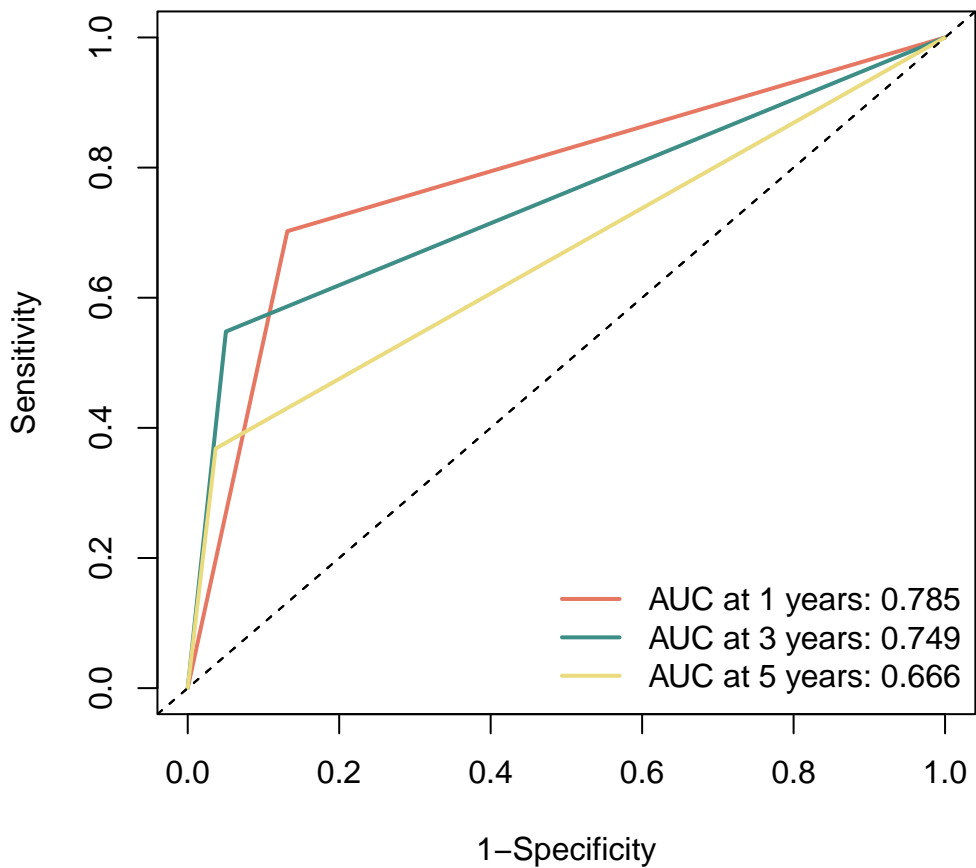

Supplement: Supplementary file 10 [file ROC.pdf › original data_lgg&metabolism/11.clinical/3.ROC/ROC.pdf]

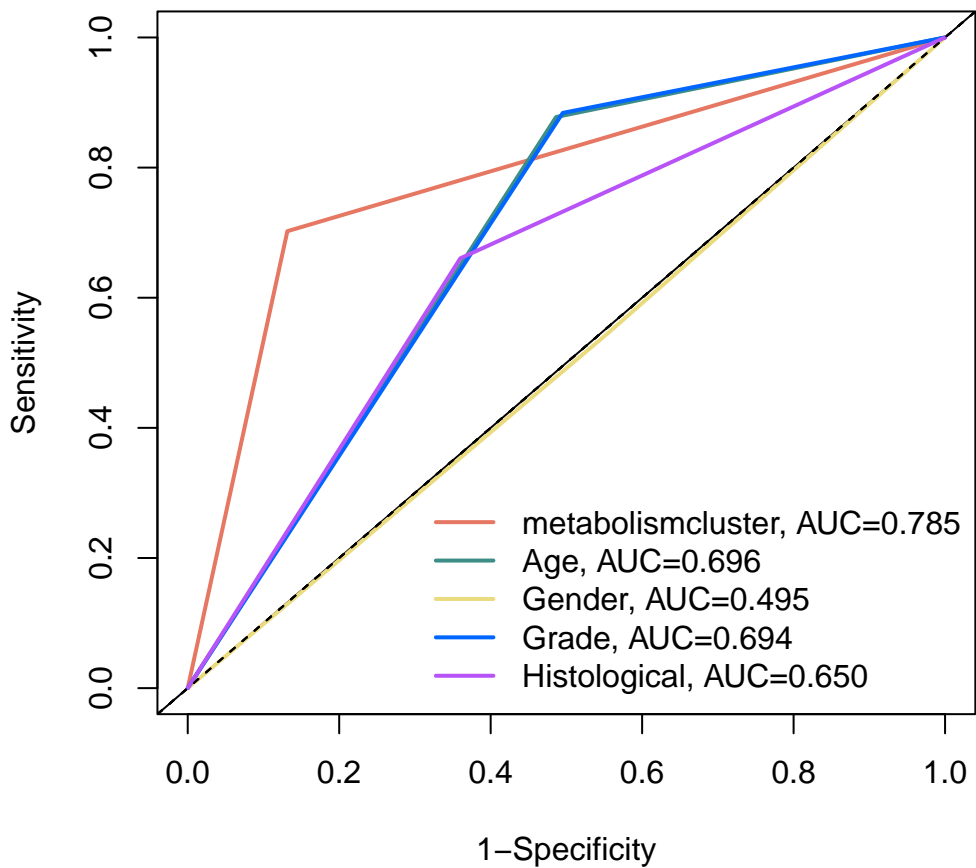

Supplement: Supplementary file 11 [file cliROC1.pdf › original data_lgg&metabolism/11.clinical/3.ROC/cliROC1.pdf]

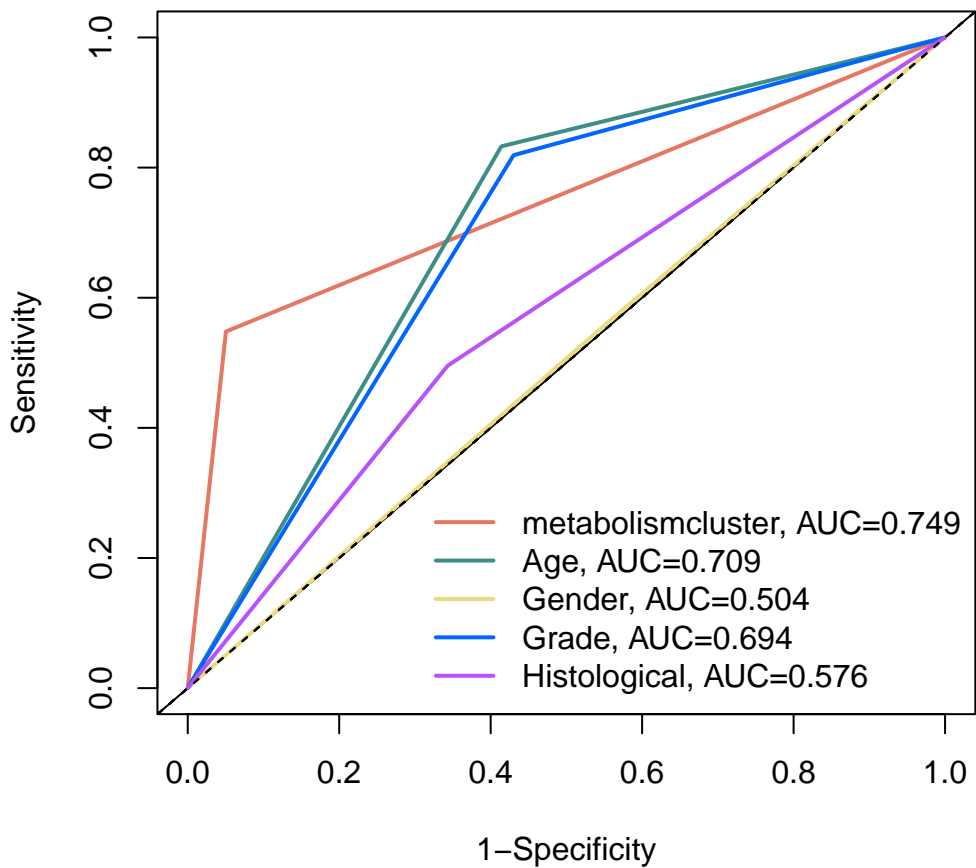

Supplement: Supplementary file 12 [file cliROC3.pdf › original data_lgg&metabolism/11.clinical/3.ROC/cliROC3.pdf]

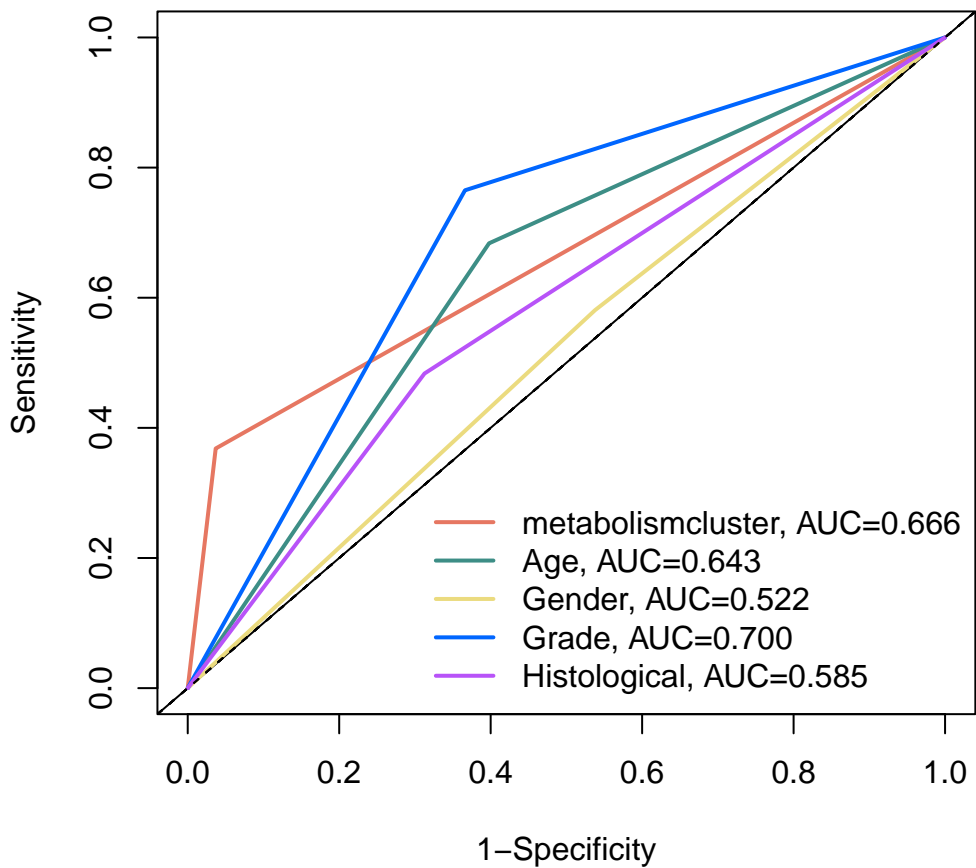

Supplement: Supplementary file 13 [file cliROC5.pdf › original data_lgg&metabolism/11.clinical/3.ROC/cliROC5.pdf]

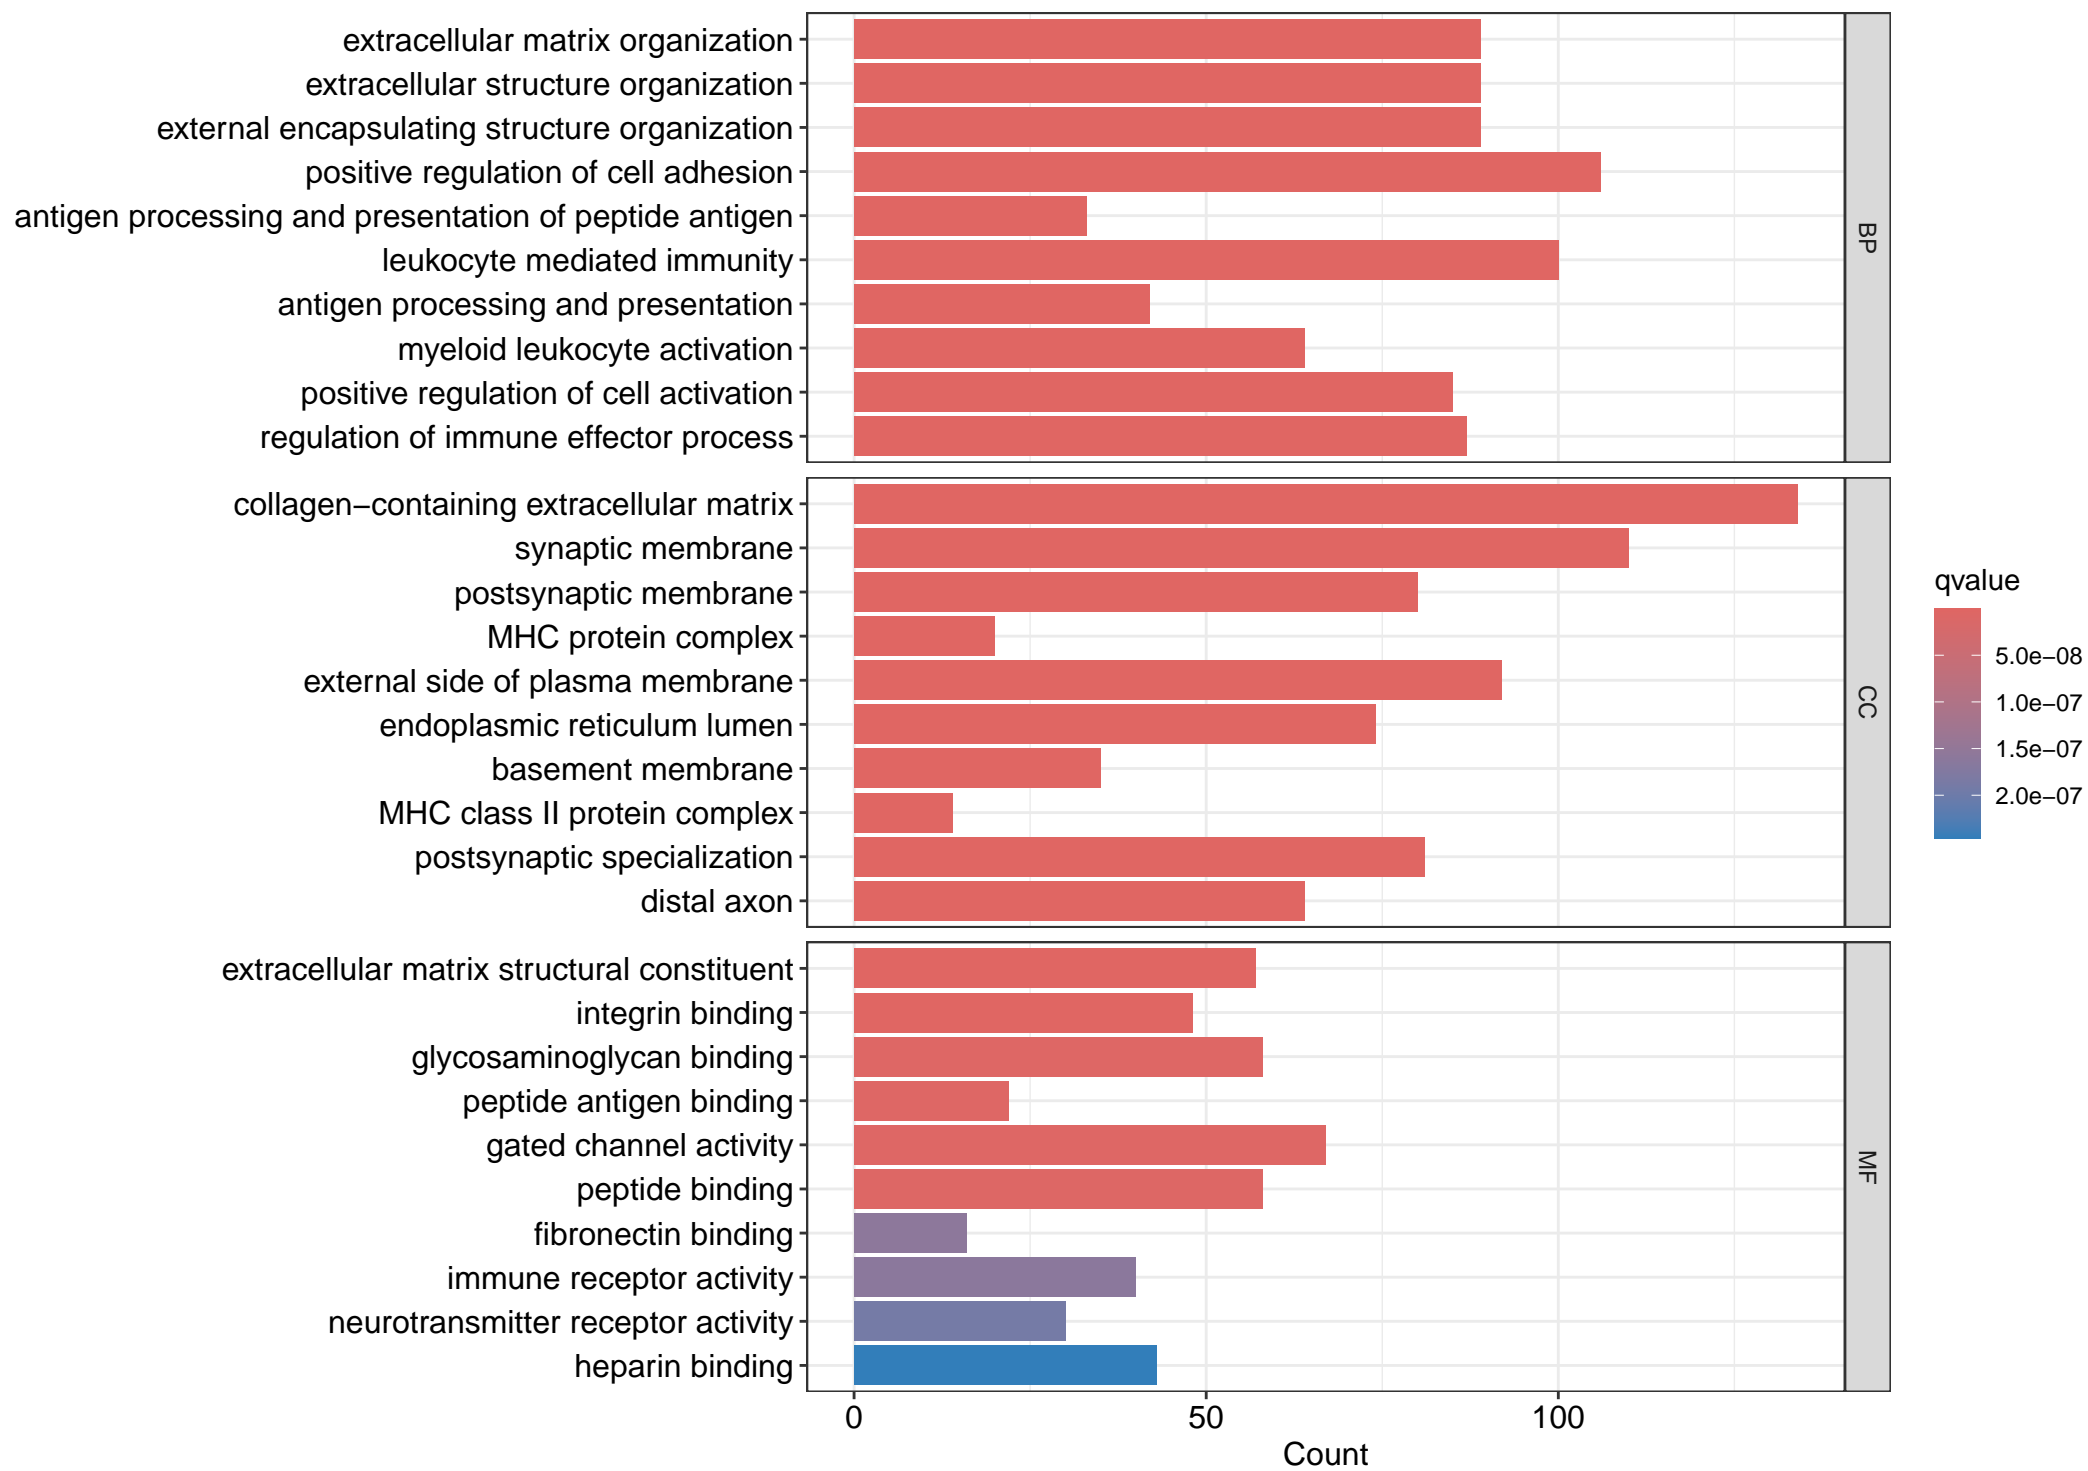

Supplement: Supplementary file 14 [file barplot.pdf › original data_lgg&metabolism/12.TypeDiff/enrichment/enrichGO/barplot.pdf]

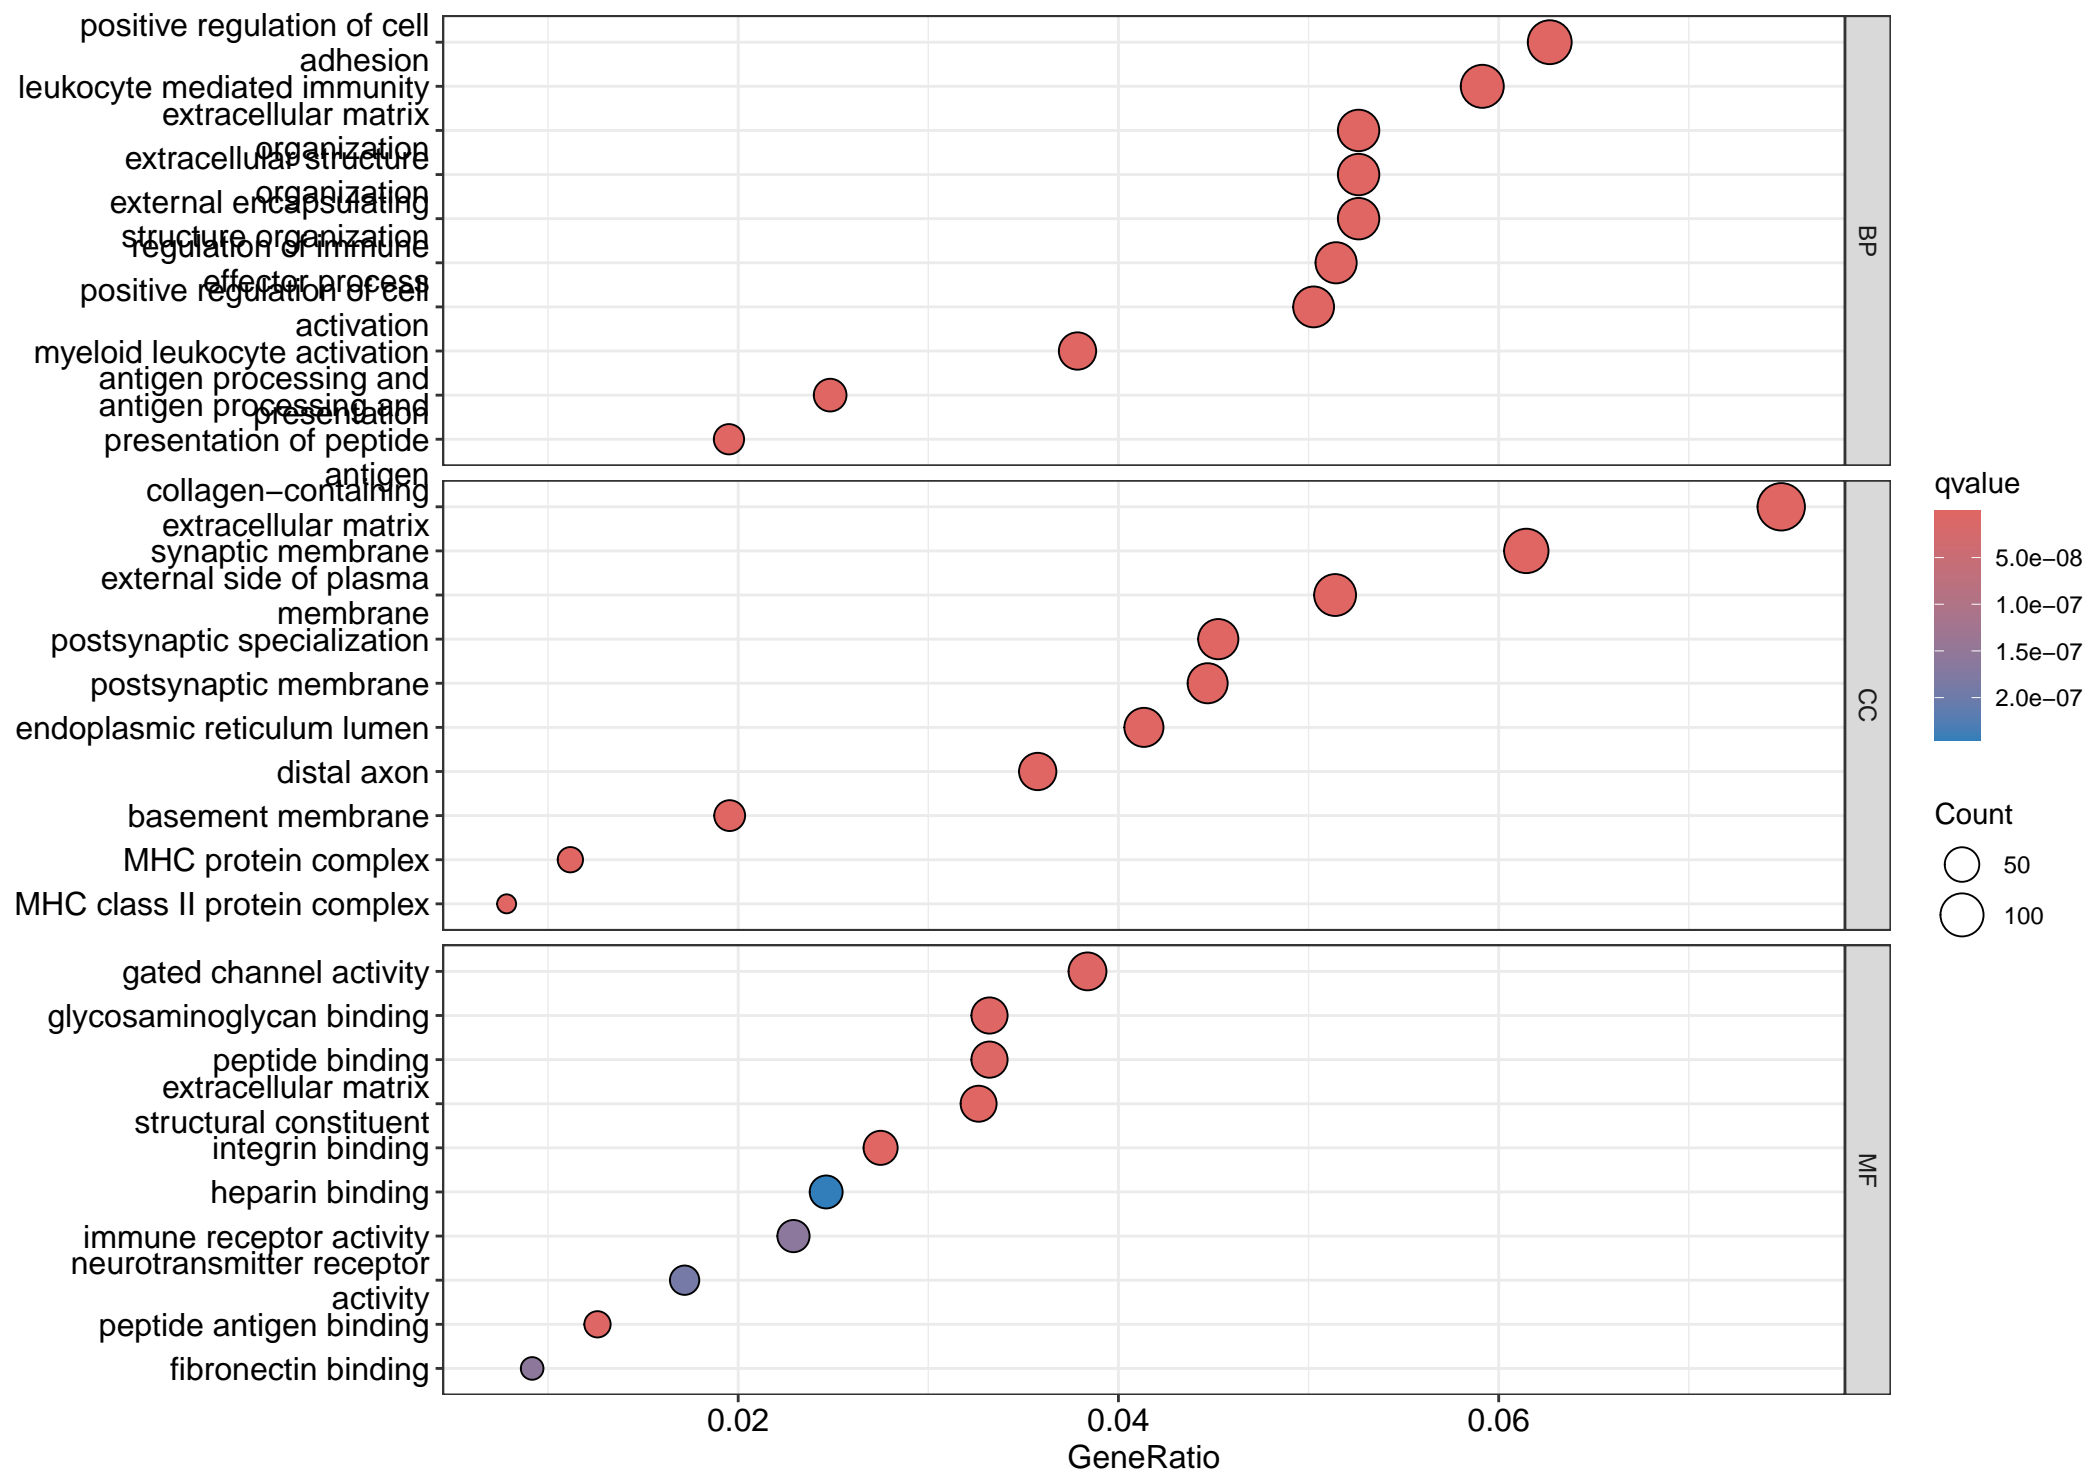

Supplement: Supplementary file 15 [file bubble.pdf › original data_lgg&metabolism/12.TypeDiff/enrichment/enrichGO/bubble.pdf]

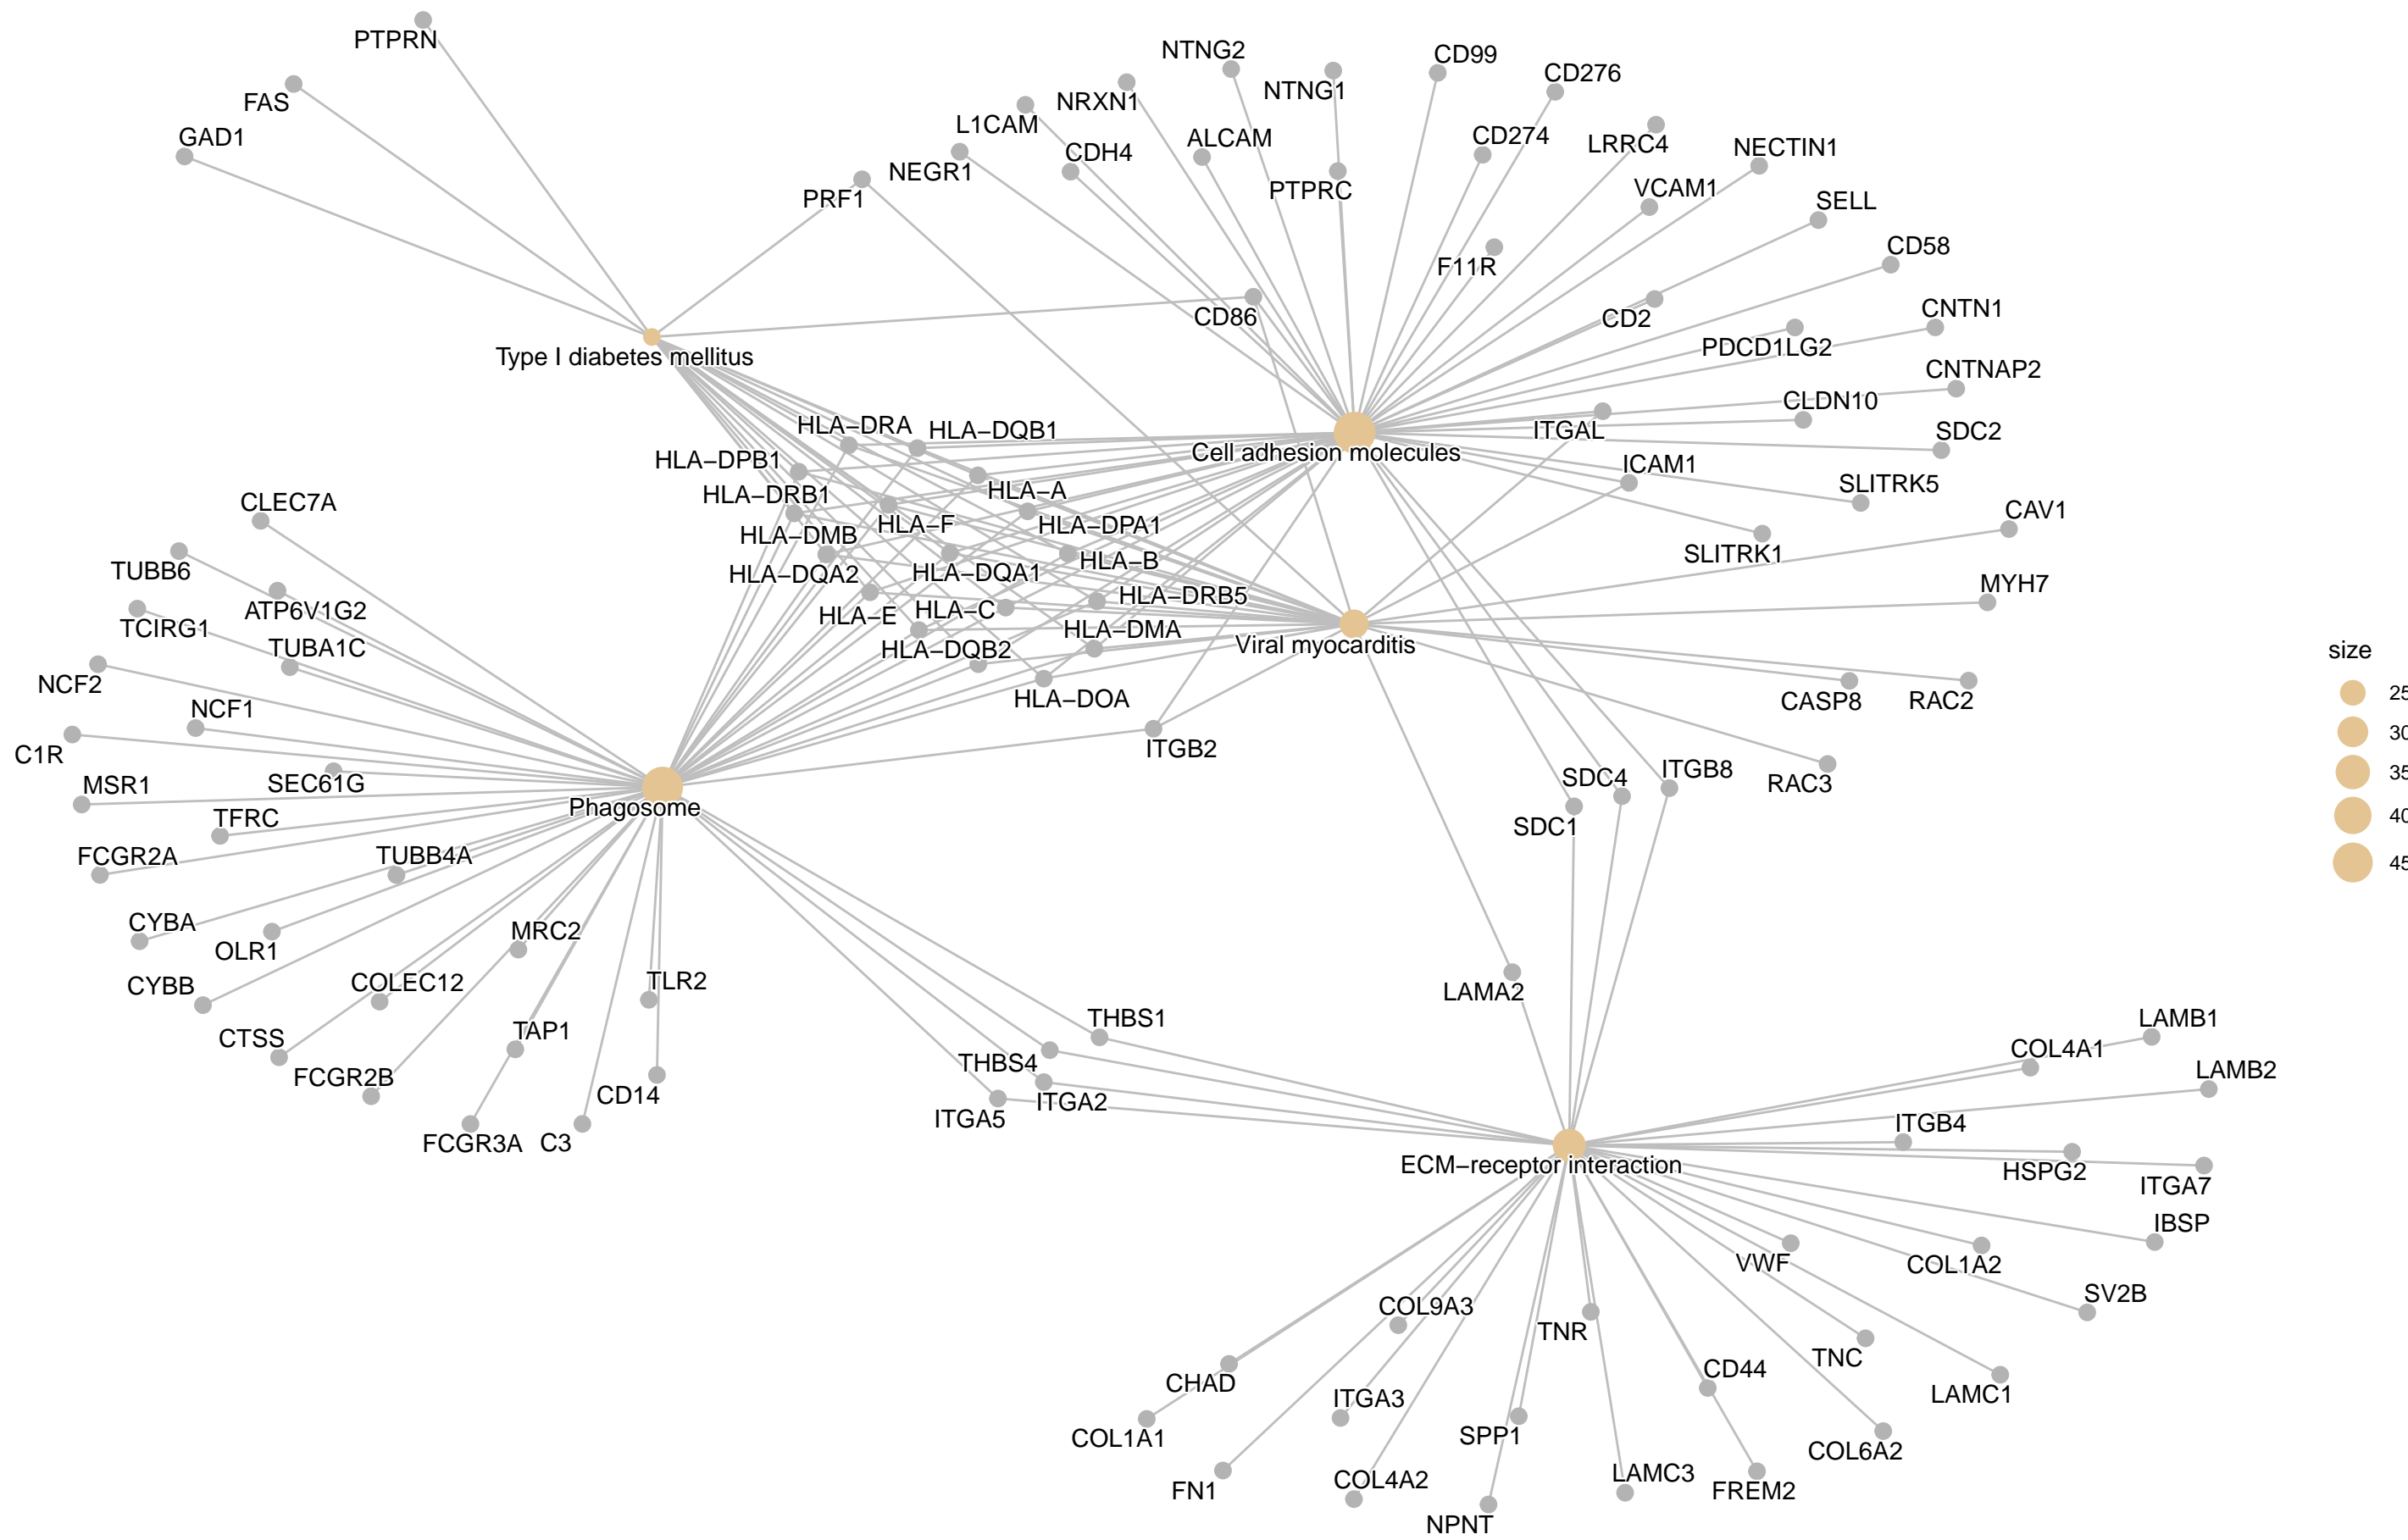

Supplement: Supplementary file 16 [file KEGG_circos.pdf › original data_lgg&metabolism/12.TypeDiff/enrichment/enrichKEGG/KEGG_circos.pdf]

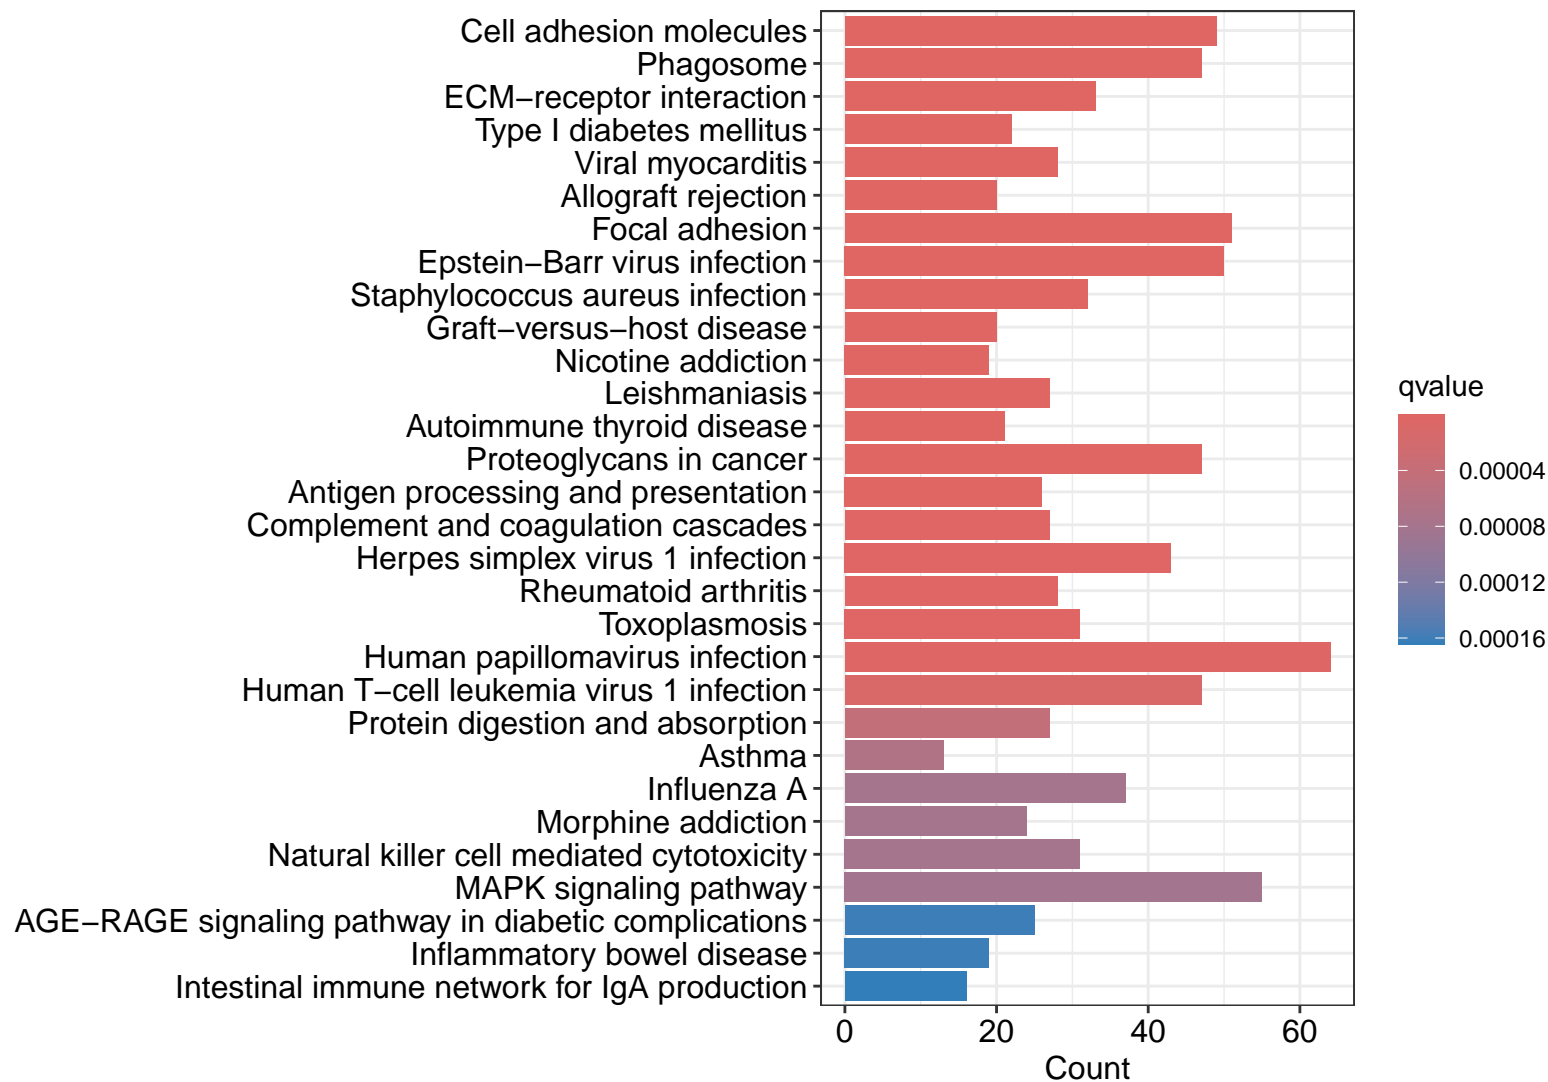

Supplement: Supplementary file 17 [file barplot.pdf › original data_lgg&metabolism/12.TypeDiff/enrichment/enrichKEGG/barplot.pdf]

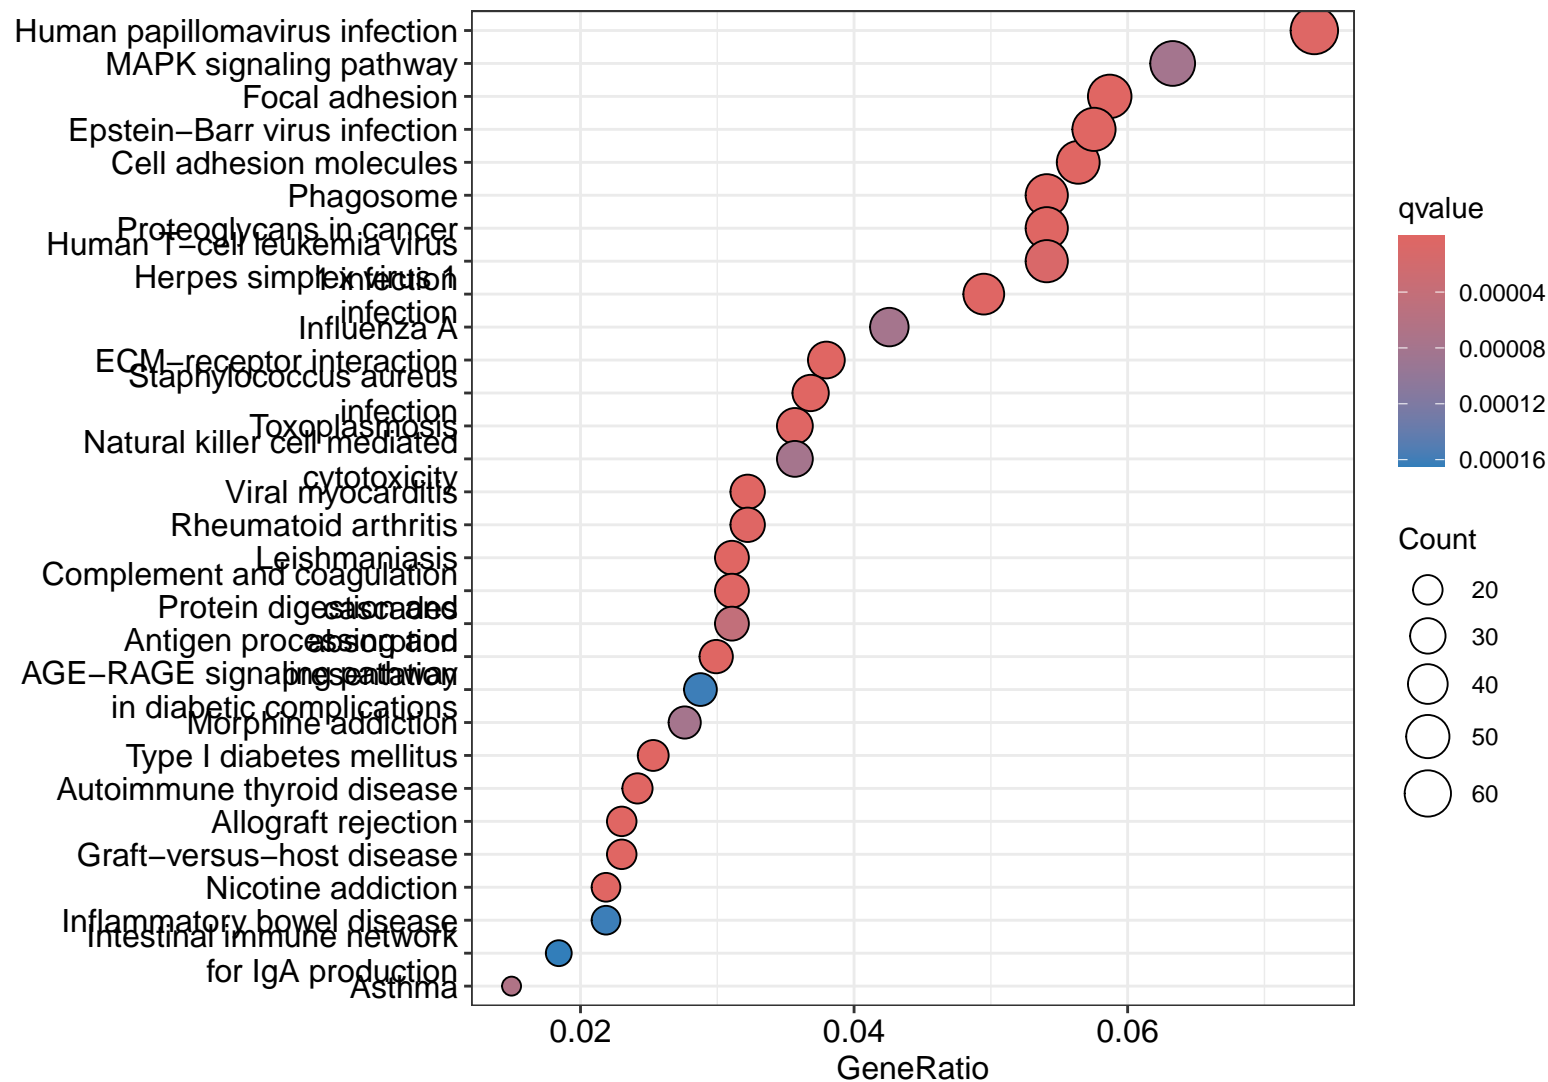

Supplement: Supplementary file 18 [file bubble.pdf › original data_lgg&metabolism/12.TypeDiff/enrichment/enrichKEGG/bubble.pdf]

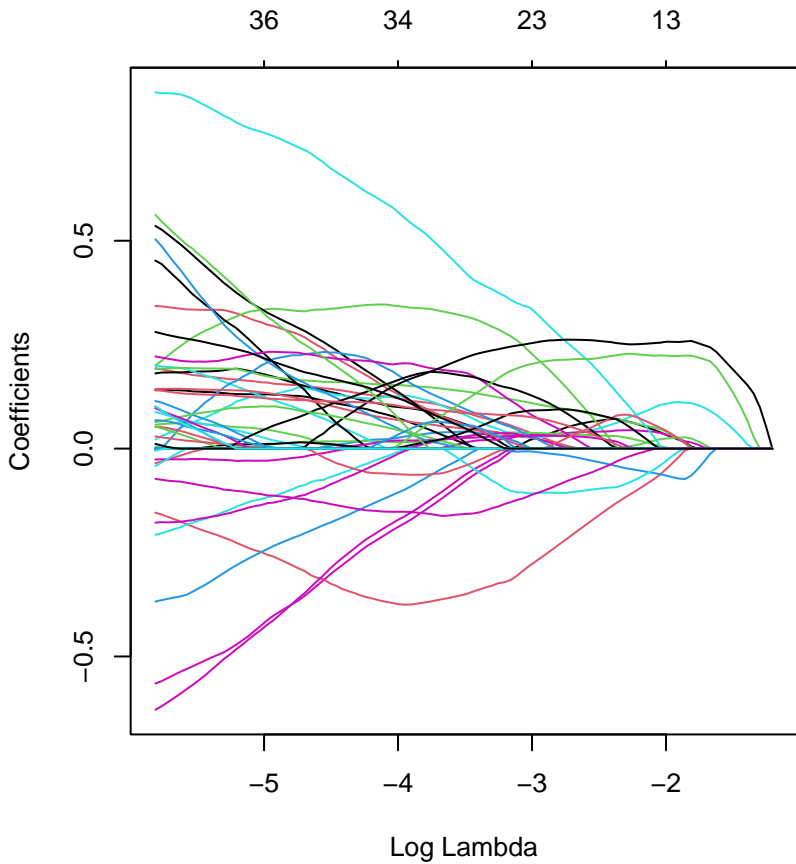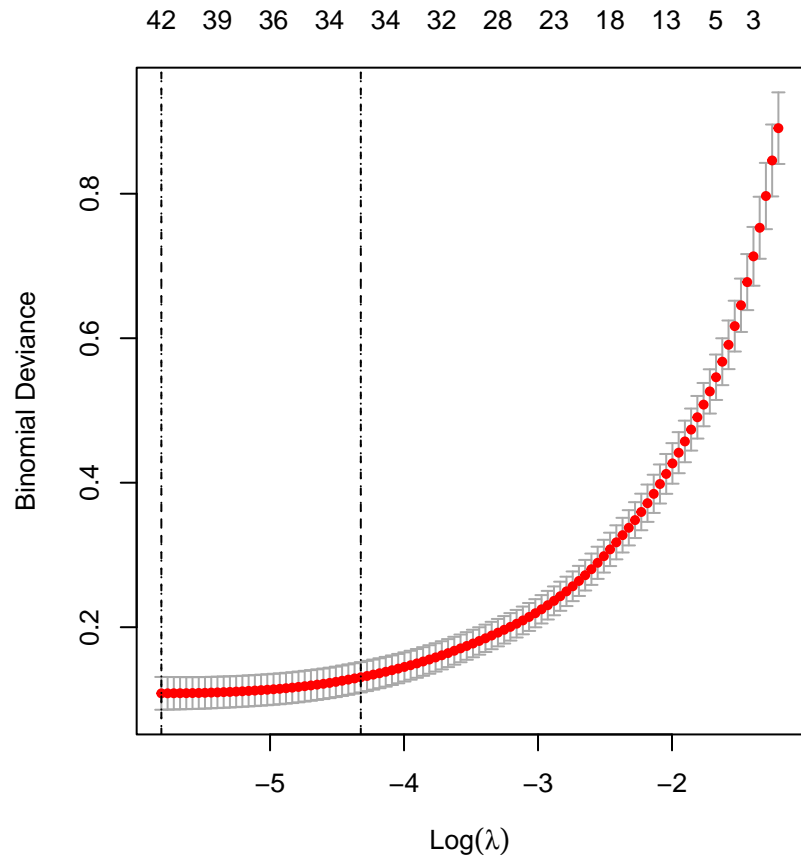

Supplement: Supplementary file 19 [file lasso.pdf › original data_lgg&metabolism/14.MACHINE_LEARNING/1.LASSO/lasso.pdf]

## Random forest

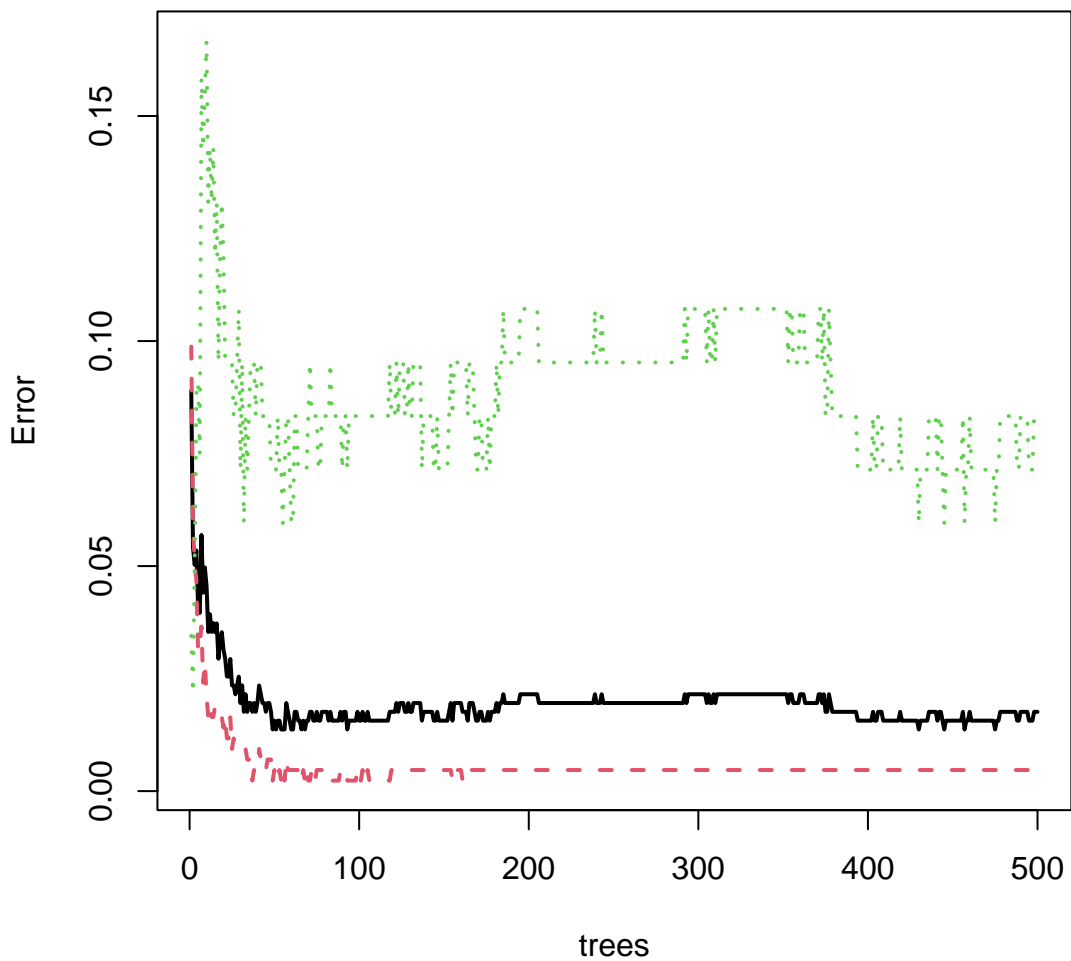

Supplement: Supplementary file 20 [file forest.pdf › original data_lgg&metabolism/14.MACHINE_LEARNING/2.RandomForest/forest.pdf]

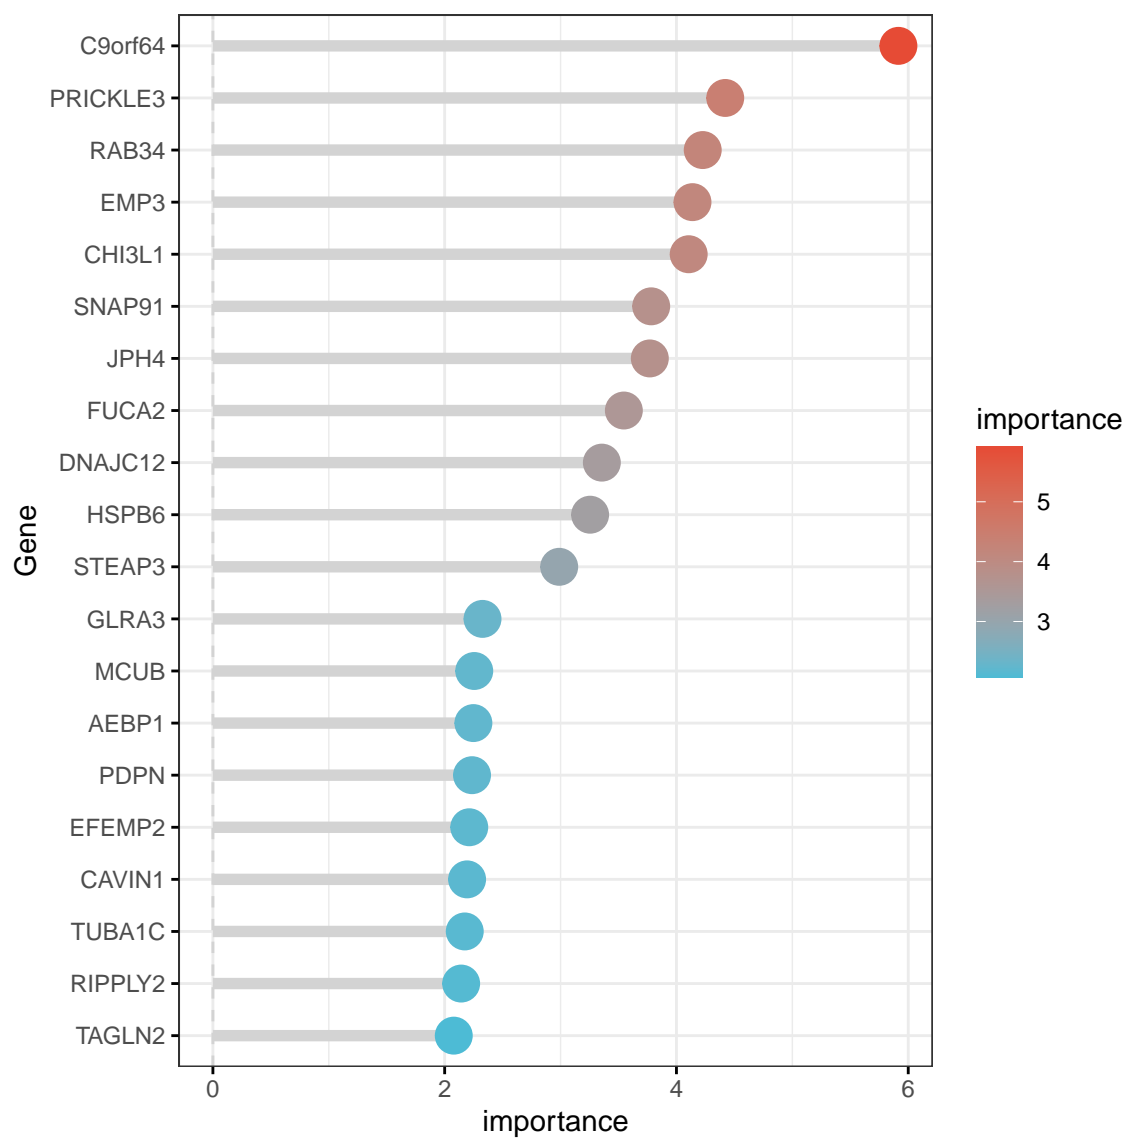

Supplement: Supplementary file 21 [file importance.pdf › original data_lgg&metabolism/14.MACHINE_LEARNING/2.RandomForest/importance.pdf]

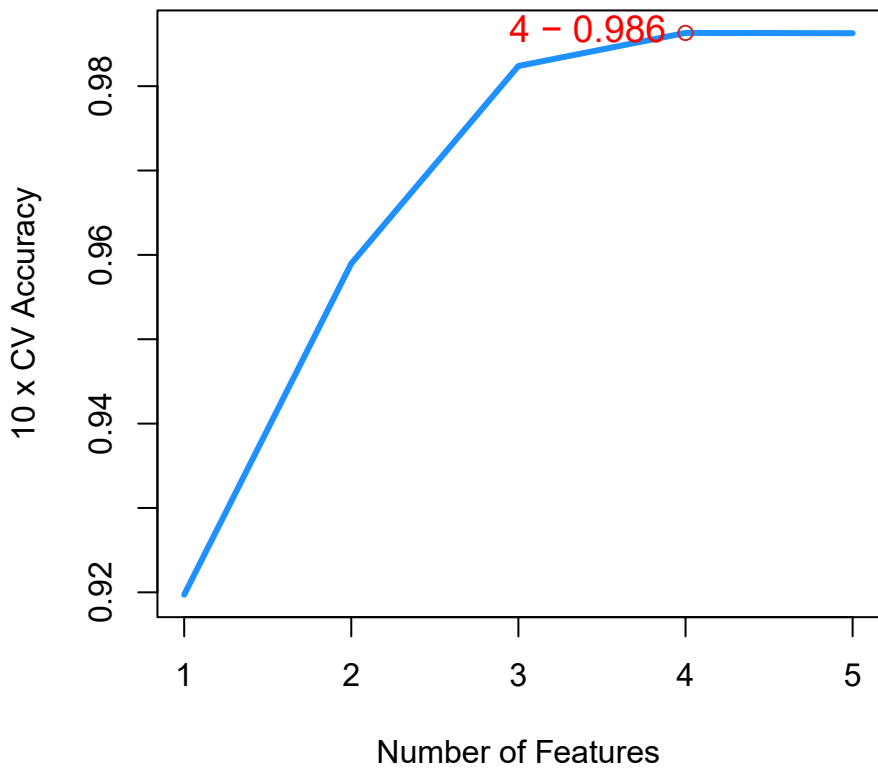

Supplement: Supplementary file 22 [file svm-accuracy.pdf › original data_lgg&metabolism/14.MACHINE_LEARNING/4.SVM_RFE/svm-accuracy.pdf]

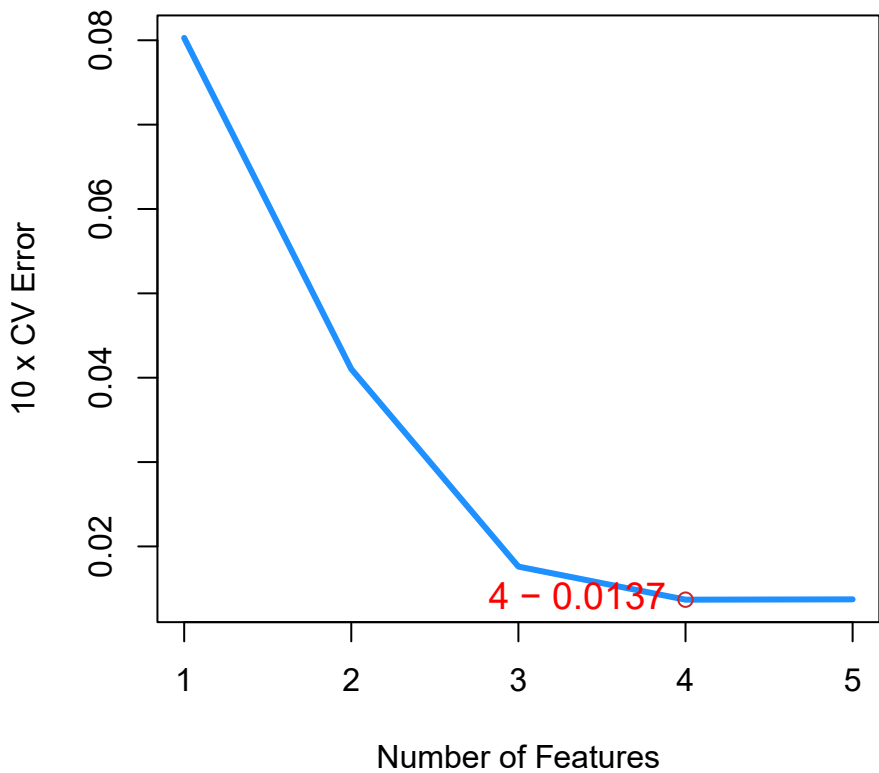

Supplement: Supplementary file 23 [file svm-error.pdf › original data_lgg&metabolism/14.MACHINE_LEARNING/4.SVM_RFE/svm-error.pdf]

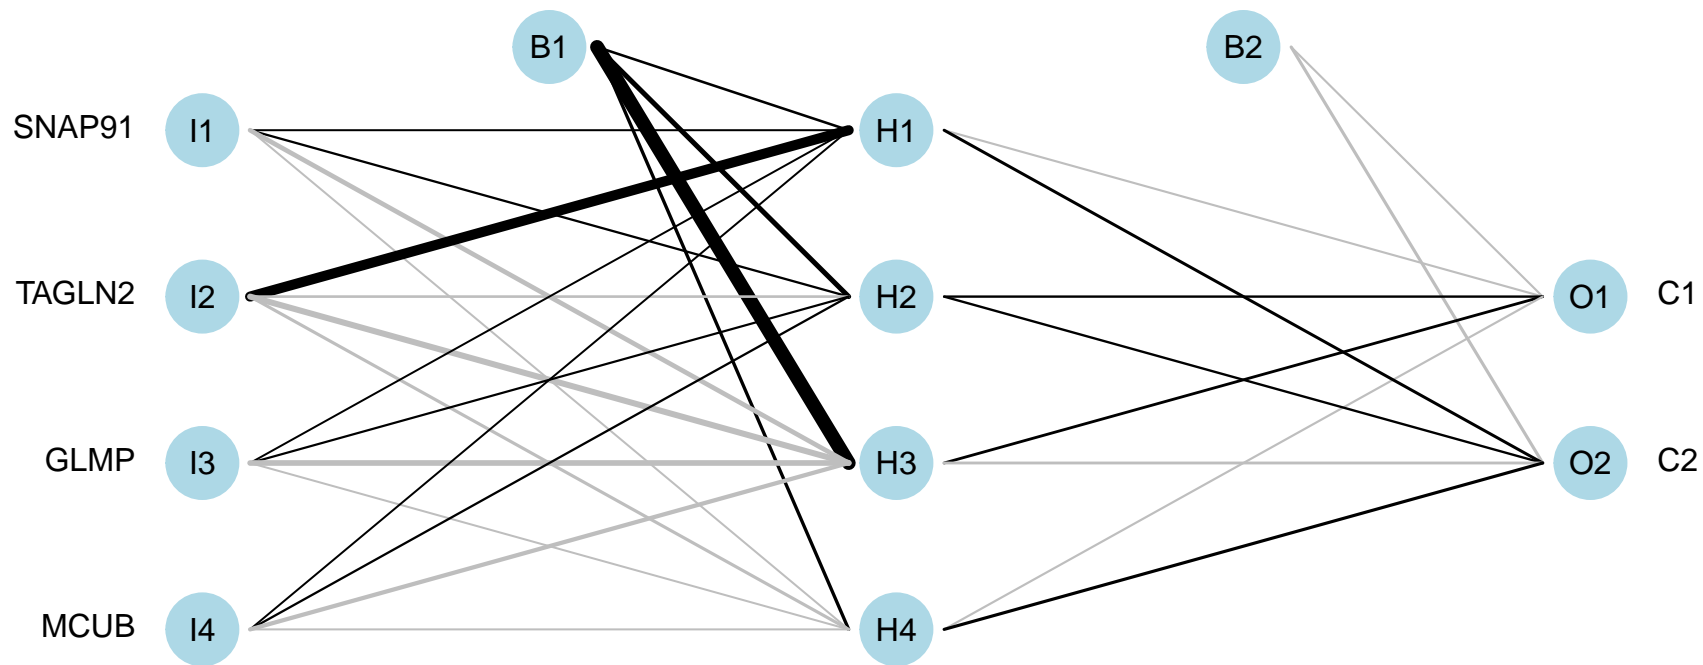

Supplement: Supplementary file 24 [file neuralnet.pdf › original data_lgg&metabolism/15.ANN/2.neuralNet/neuralnet.pdf]

## neuralNet model

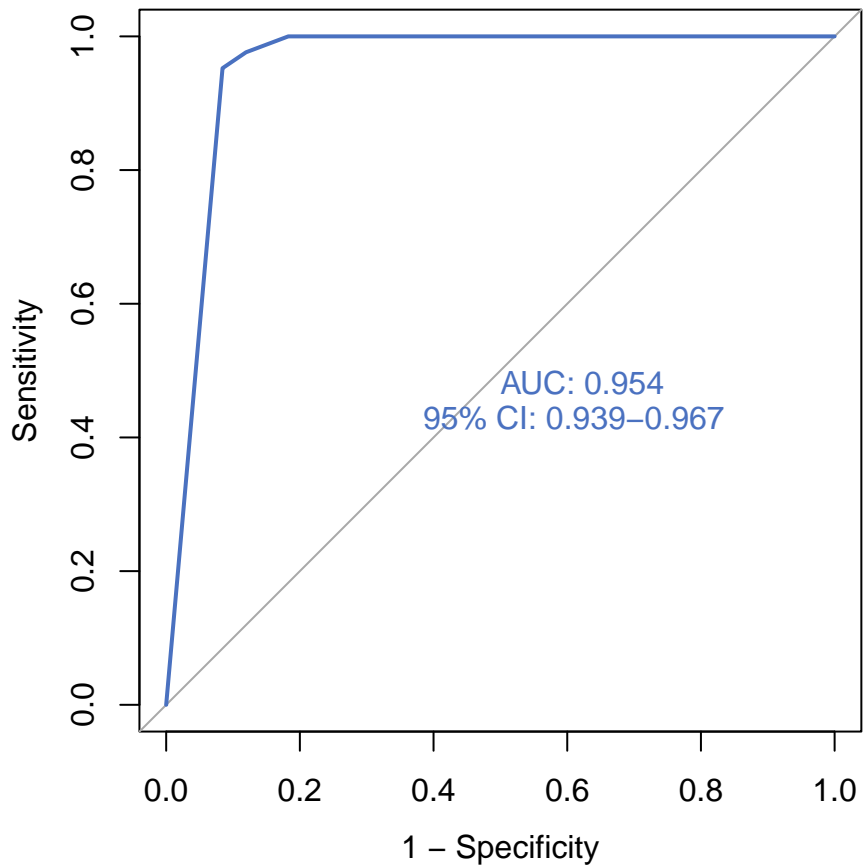

Supplement: Supplementary file 25 [file ROC.pdf › original data_lgg&metabolism/15.ANN/3.neuralROC/ROC.pdf]

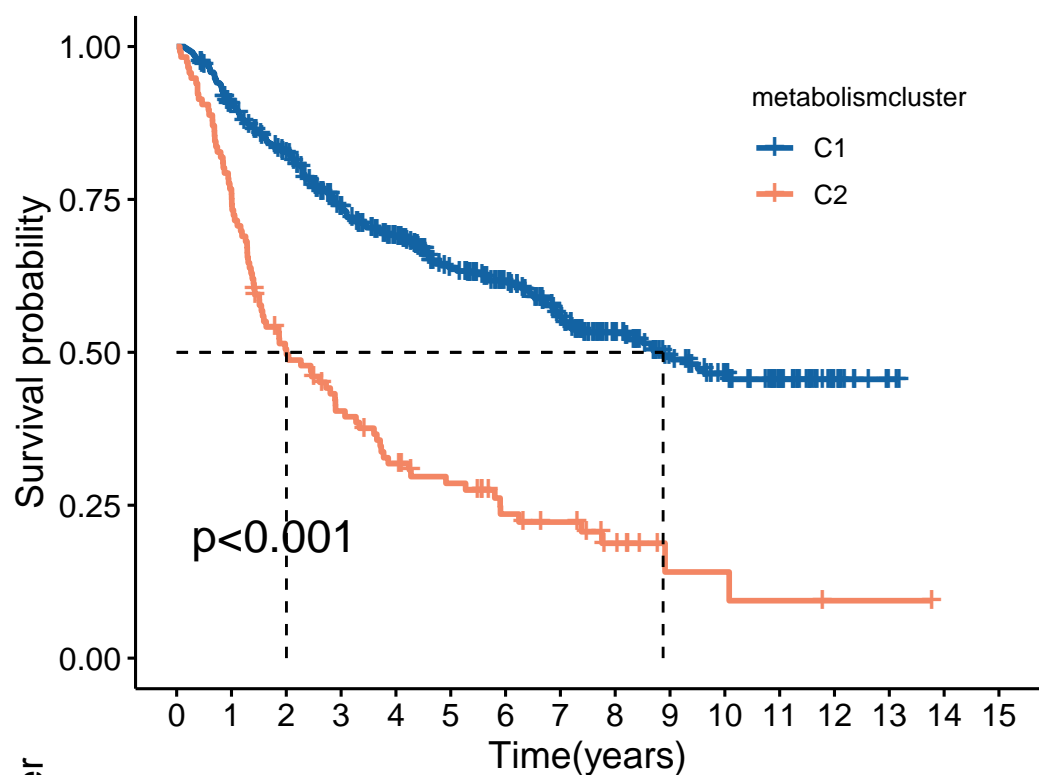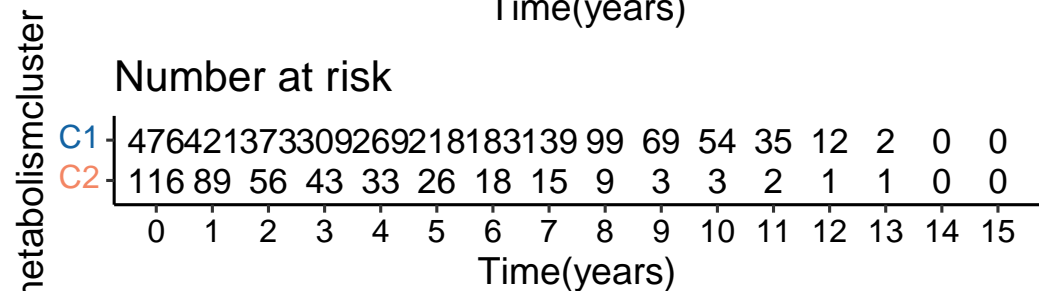

Supplement: Supplementary file 26 [file survival.pdf › original data_lgg&metabolism/16.ANN_validation/CGGA/4.Sur/survival.pdf]

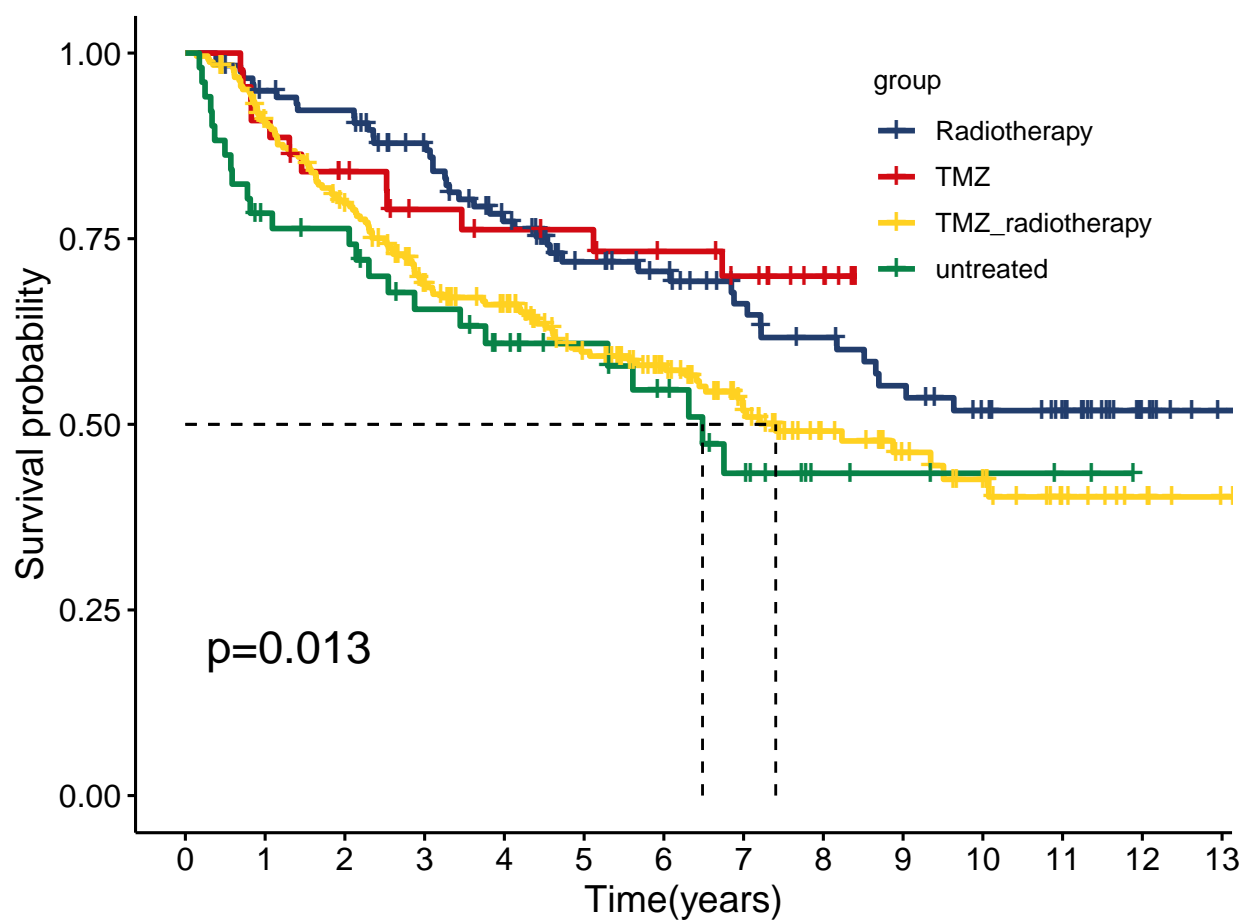

Number at risk

| group            | 0   | 1   | 2   | 3   | 4   | 5   | 6  | 7  | 8  | 9  | 10 | 11 | 12 | 13 |
|------------------|-----|-----|-----|-----|-----|-----|----|----|----|----|----|----|----|----|
| Radiotherapy     | 119 | 110 | 106 | 93  | 77  | 60  | 54 | 44 | 39 | 34 | 28 | 22 | 7  | 1  |
| TMZ              | 44  | 40  | 34  | 29  | 27  | 26  | 23 | 20 | 14 | 3  | 2  | 0  | 0  | 0  |
| TMZ_radiotherapy | 246 | 218 | 189 | 152 | 136 | 108 | 86 | 61 | 38 | 27 | 21 | 11 | 5  | 1  |
| untreated        | 51  | 38  | 36  | 29  | 24  | 20  | 16 | 11 | 5  | 4  | 3  | 2  | 0  | 0  |

Time(years)

Supplement: Supplementary file 27 [file survival.pdf › original data_lgg&metabolism/16.ANN_validation/CGGA/5.subgroup_Sur/metabolismcluster/C1/survival.pdf]

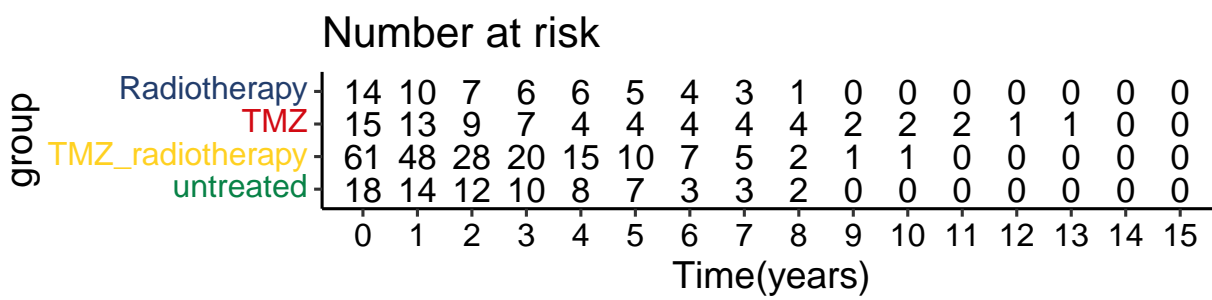

Supplement: Supplementary file 28 [file survival.pdf › original data_lgg&metabolism/16.ANN_validation/CGGA/5.subgroup_Sur/metabolismcluster/C2/survival.pdf]

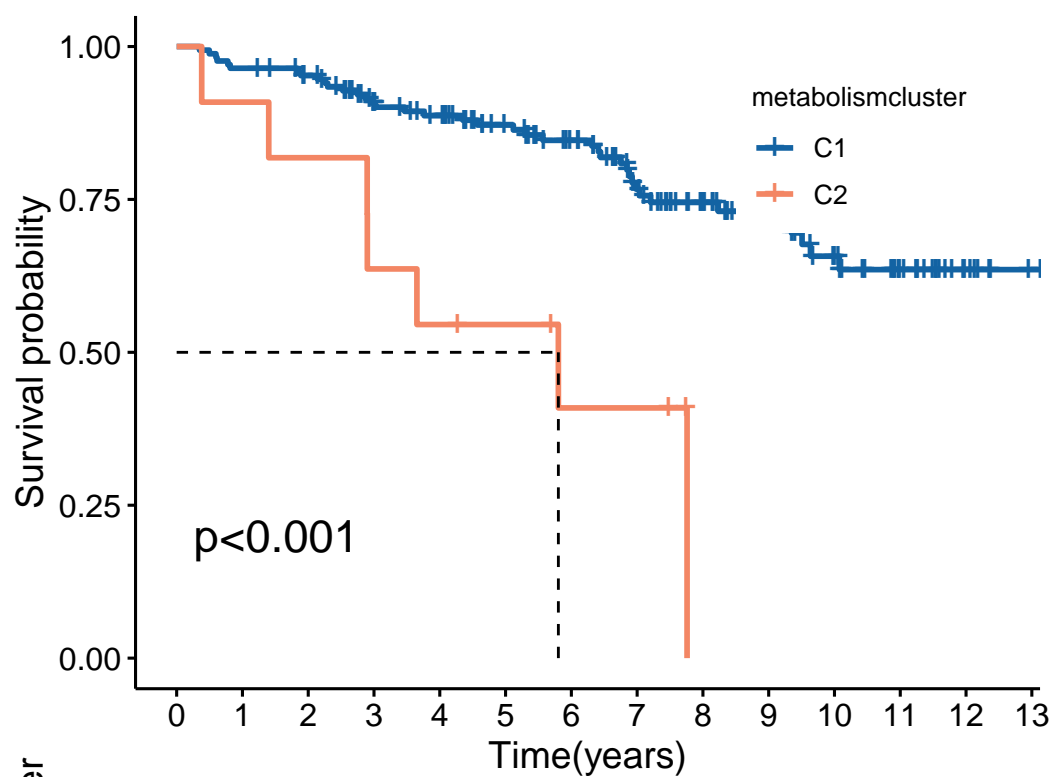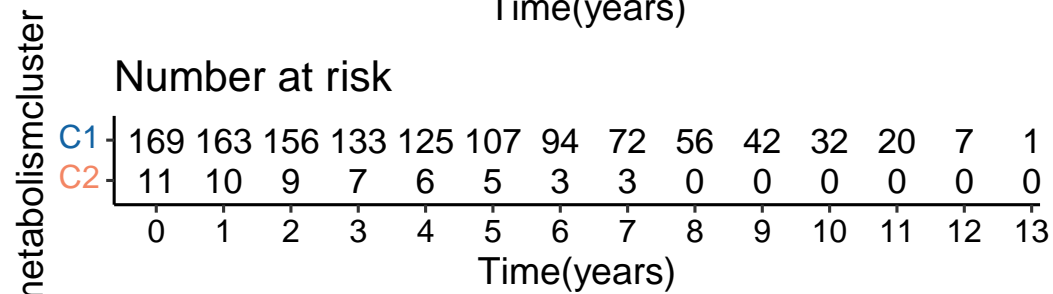

Supplement: Supplementary file 29 [file survival.pdf › original data_lgg&metabolism/16.ANN_validation/CGGA/5.subgroup_Sur/mutant/Codel_1p19q/survival.pdf]

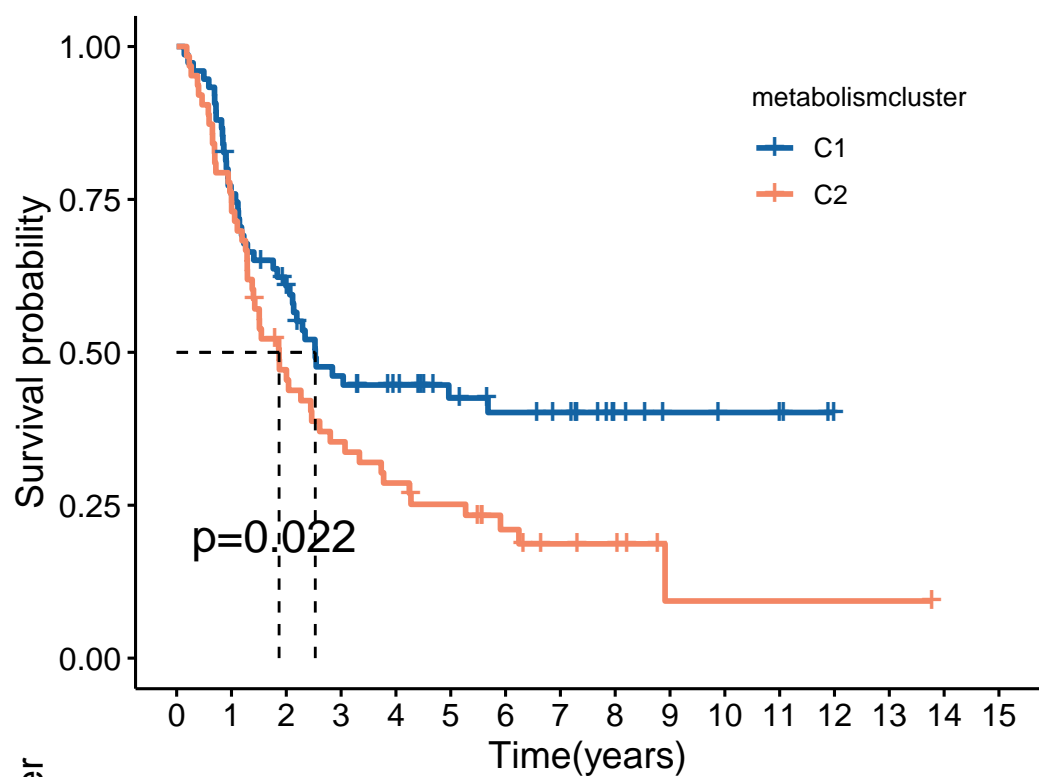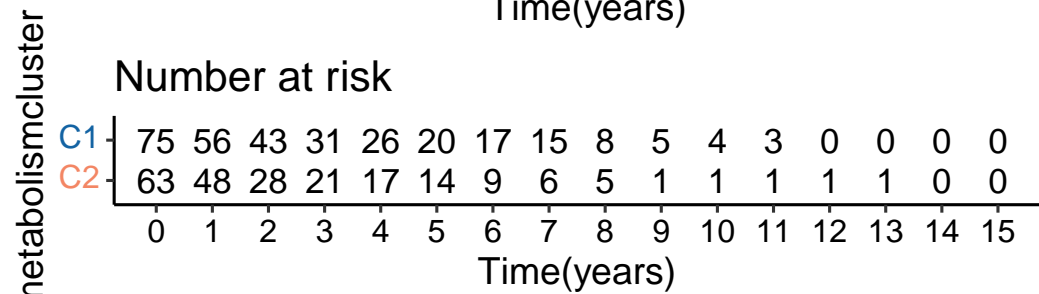

Supplement: Supplementary file 30 [file survival.pdf › original data_lgg&metabolism/16.ANN_validation/CGGA/5.subgroup_Sur/mutant/IDH_Wildtype/survival.pdf]

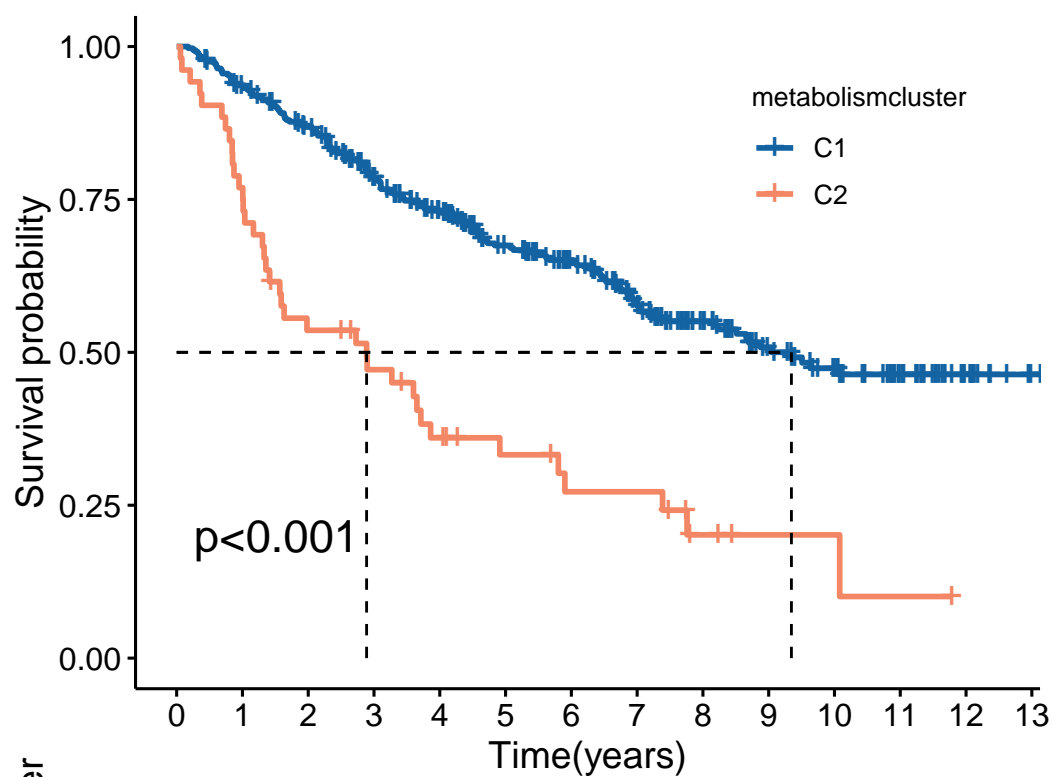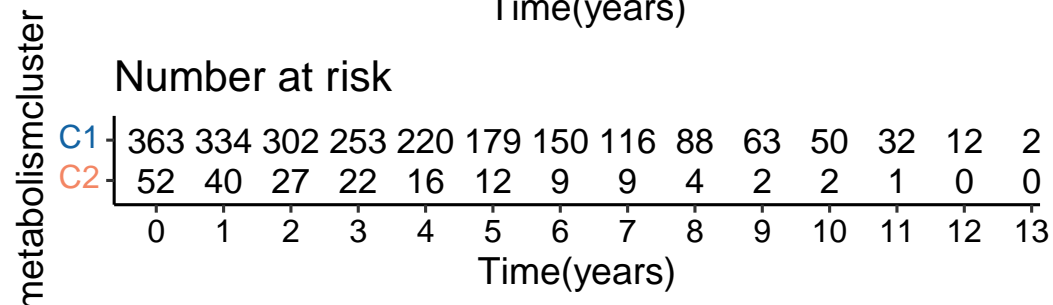

Supplement: Supplementary file 31 [file survival.pdf › original data_lgg&metabolism/16.ANN_validation/CGGA/5.subgroup_Sur/mutant/IDH_mutatnt/survival.pdf]

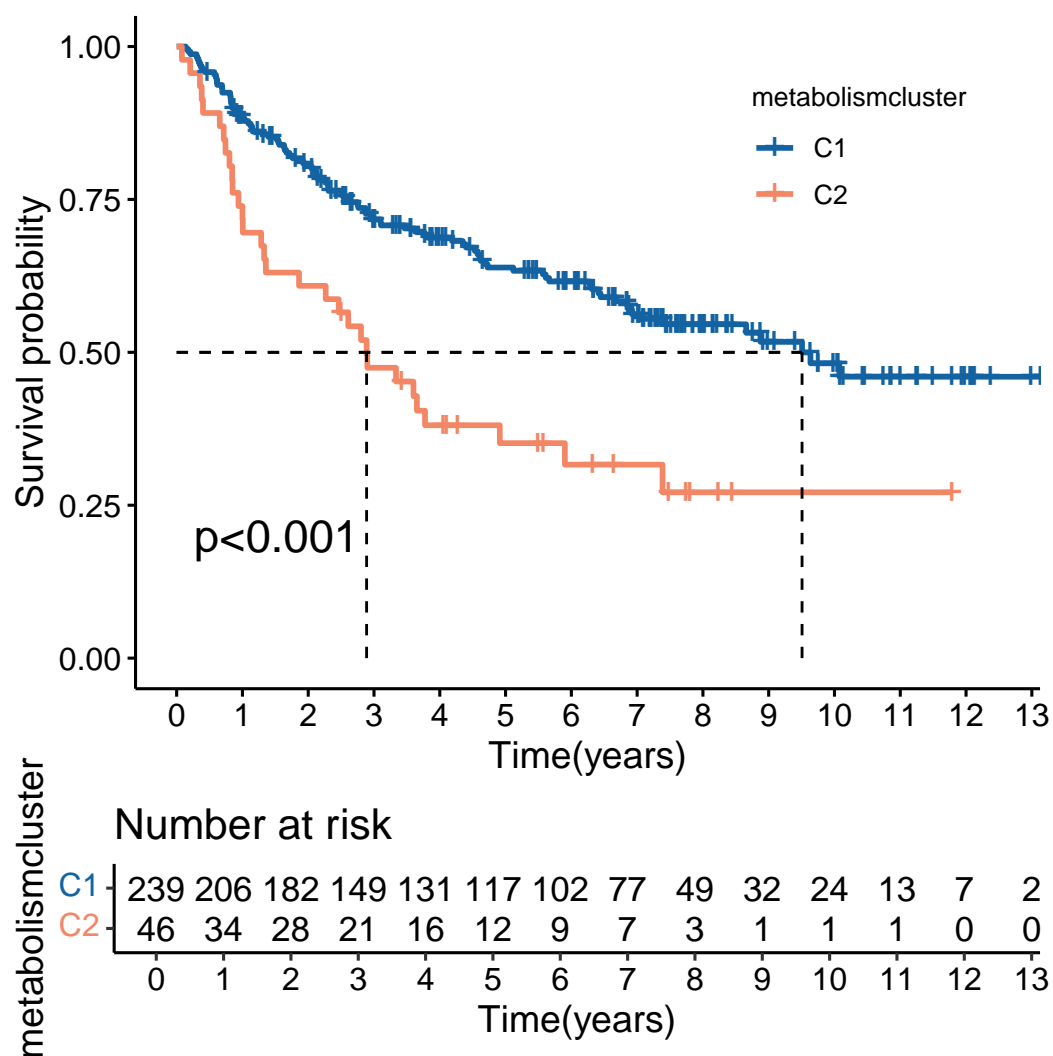

Supplement: Supplementary file 32 [file survival.pdf › original data_lgg&metabolism/16.ANN_validation/CGGA/5.subgroup_Sur/mutant/MGMTp_methylation/survival.pdf]

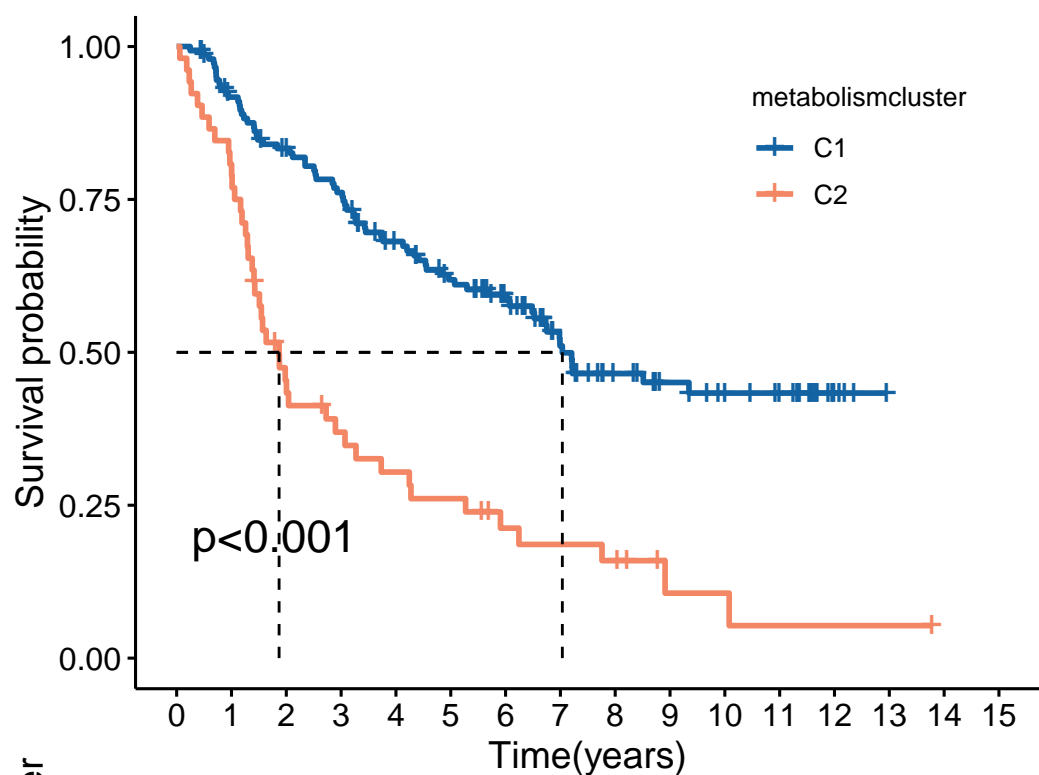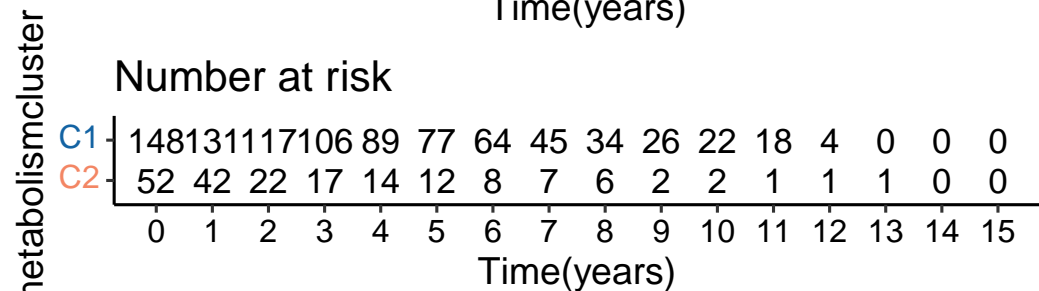

Supplement: Supplementary file 33 [file survival.pdf › original data_lgg&metabolism/16.ANN_validation/CGGA/5.subgroup_Sur/mutant/MGMTp_unmethylation/survival.pdf]

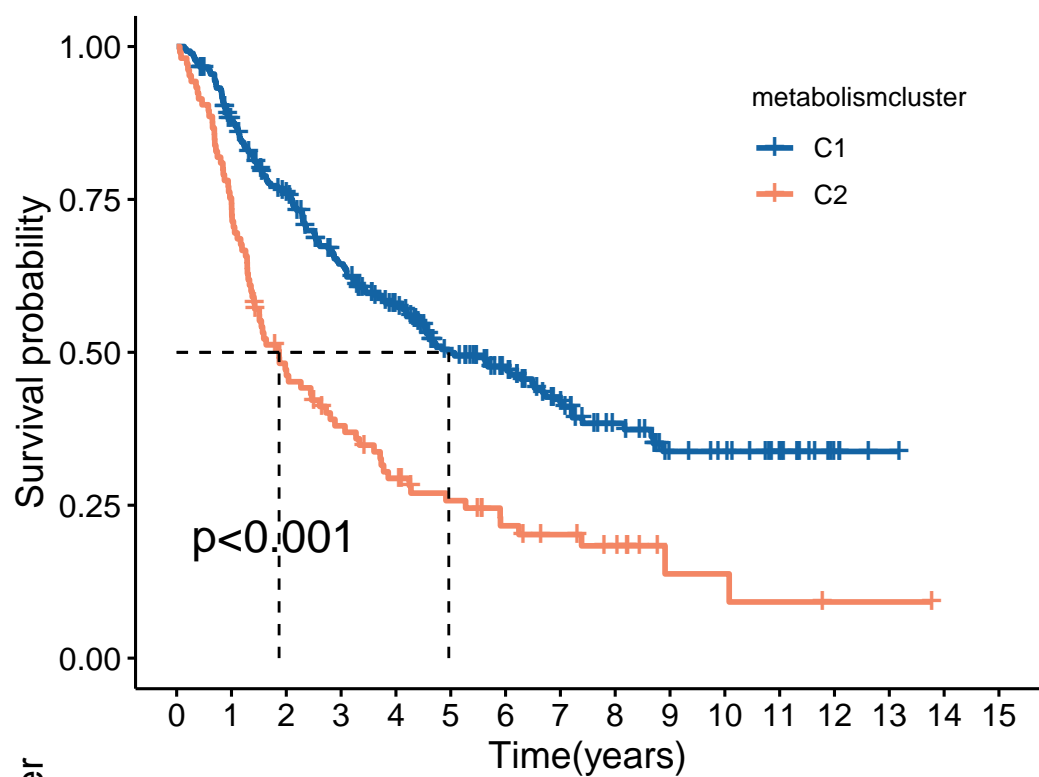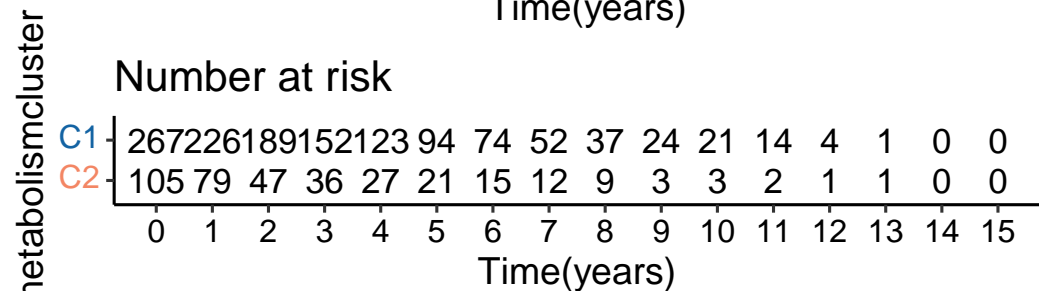

Supplement: Supplementary file 34 [file survival.pdf › original data_lgg&metabolism/16.ANN_validation/CGGA/5.subgroup_Sur/mutant/Non_Codel_1p19q/survival.pdf]

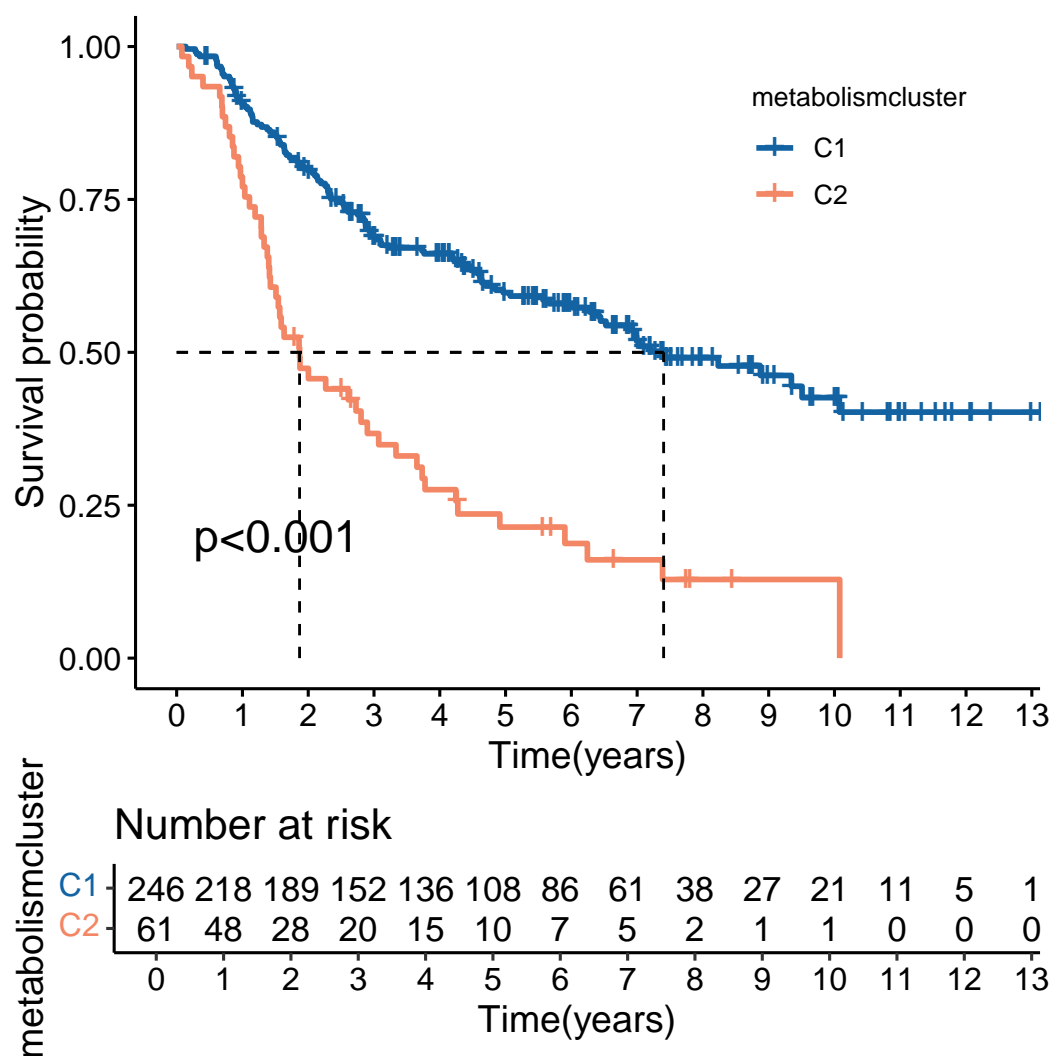

Supplement: Supplementary file 36 [file survival.pdf › original data_lgg&metabolism/16.ANN_validation/CGGA/5.subgroup_Sur/therapy/TMZ_radiotherapy/survival.pdf]

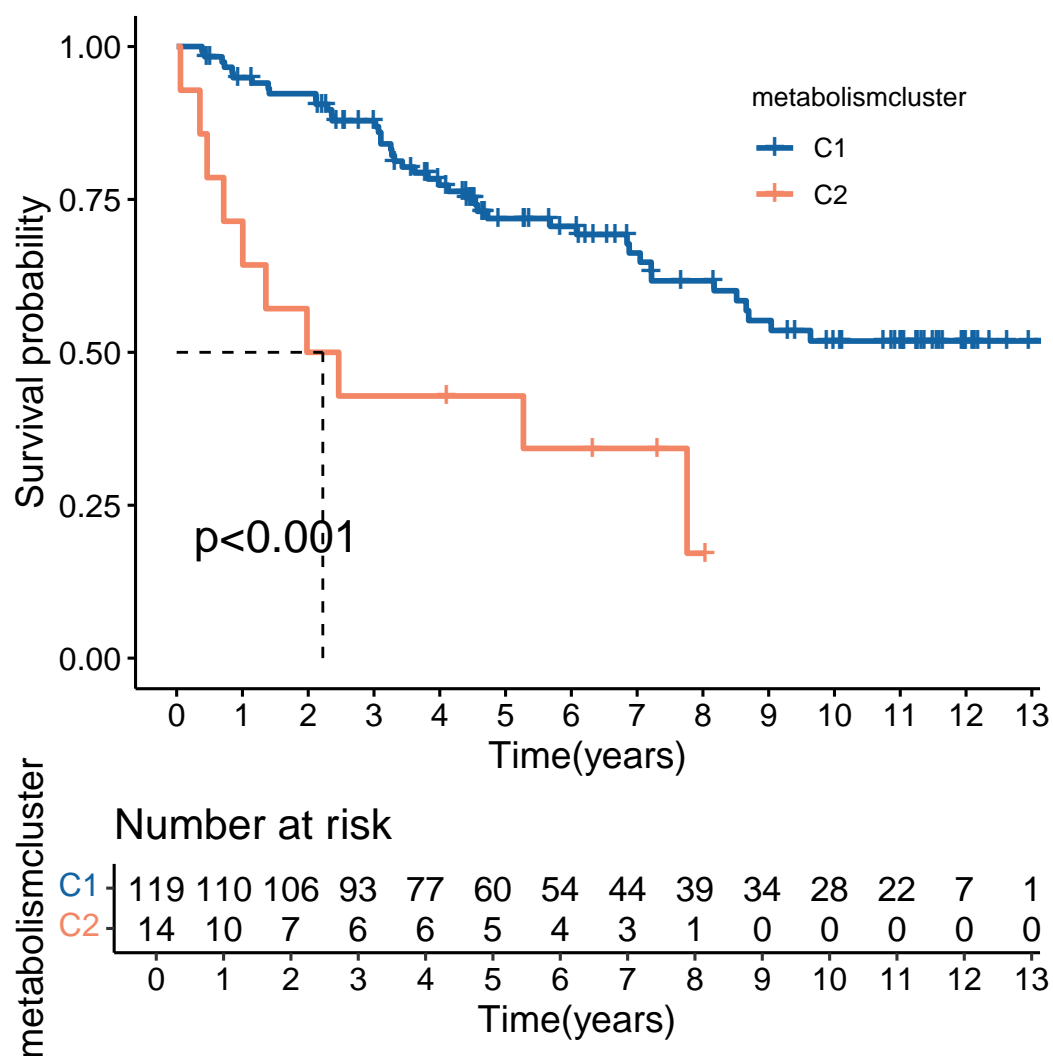

Supplement: Supplementary file 37 [file survival.pdf › original data_lgg&metabolism/16.ANN_validation/CGGA/5.subgroup_Sur/therapy/radiotherapy/survival.pdf]

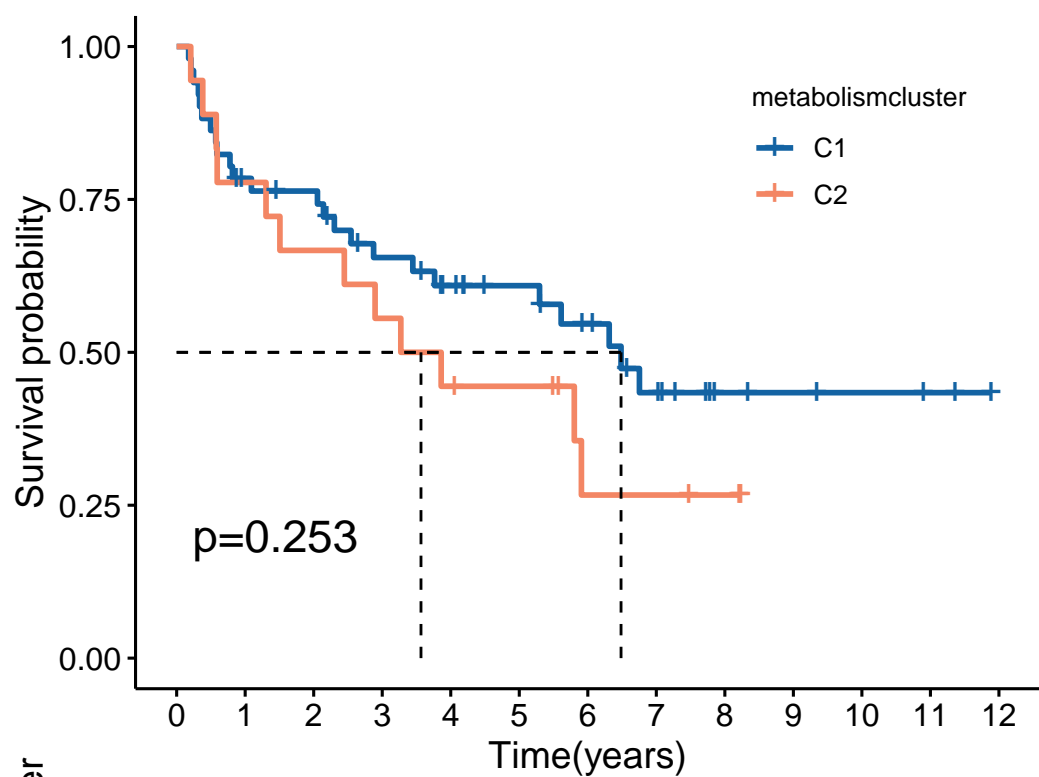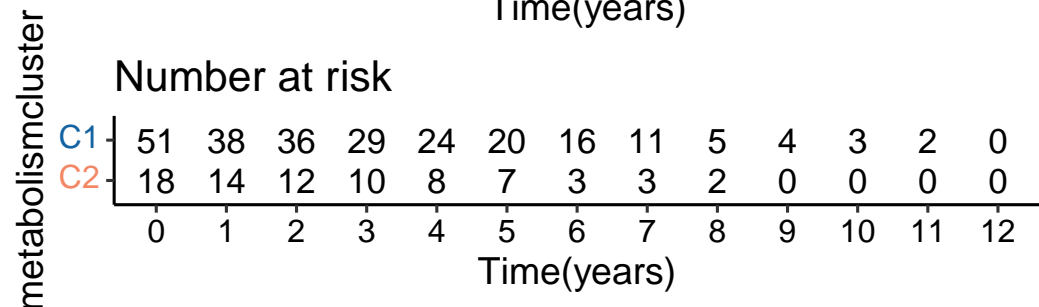

Supplement: Supplementary file 38 [file survival.pdf › original data_lgg&metabolism/16.ANN_validation/CGGA/5.subgroup_Sur/therapy/untreated/survival.pdf]

Percent weight

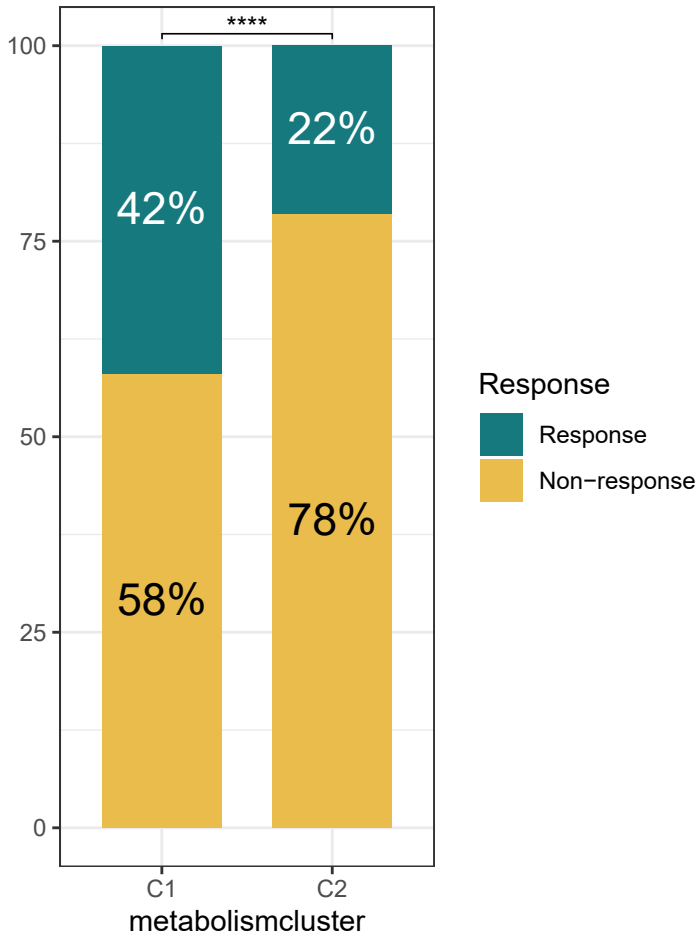

Supplement: Supplementary file 39 [file barplot.pdf › original data_lgg&metabolism/16.ANN_validation/CGGA/6.TIDE/barplot.pdf]

metabolismcluster

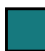

C1

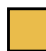

C2

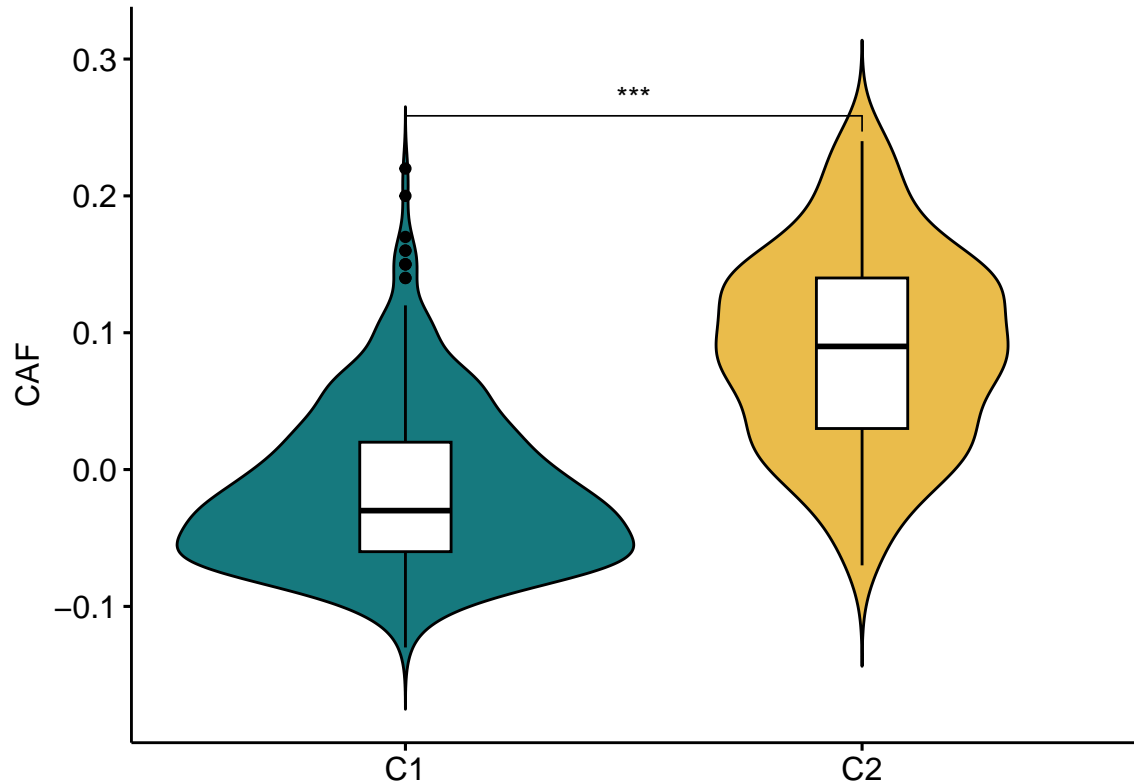

Supplement: Supplementary file 40 [file violin.CAF.pdf › original data_lgg&metabolism/16.ANN_validation/CGGA/6.TIDE/violin.CAF.pdf]

metabolismcluster C1 C2

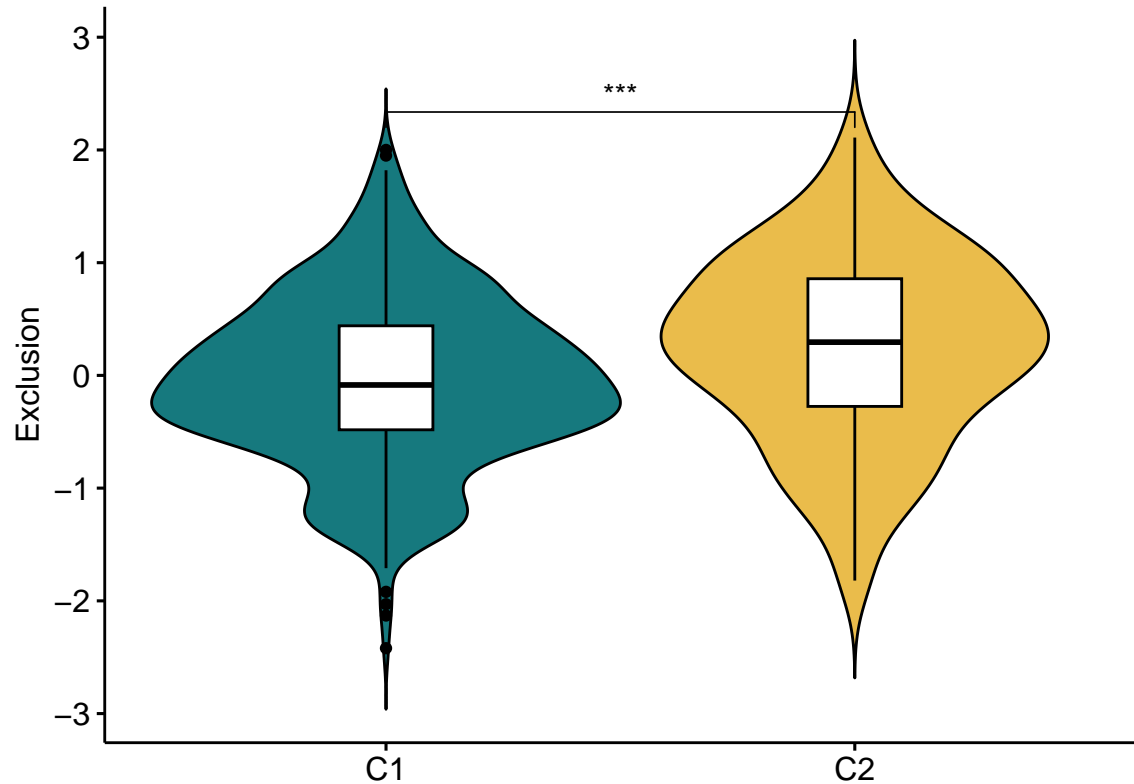

Supplement: Supplementary file 41 [file violin.Exclusion.pdf › original data_lgg&metabolism/16.ANN_validation/CGGA/6.TIDE/violin.Exclusion.pdf]

metabolismcluster

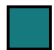

C1

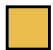

C2

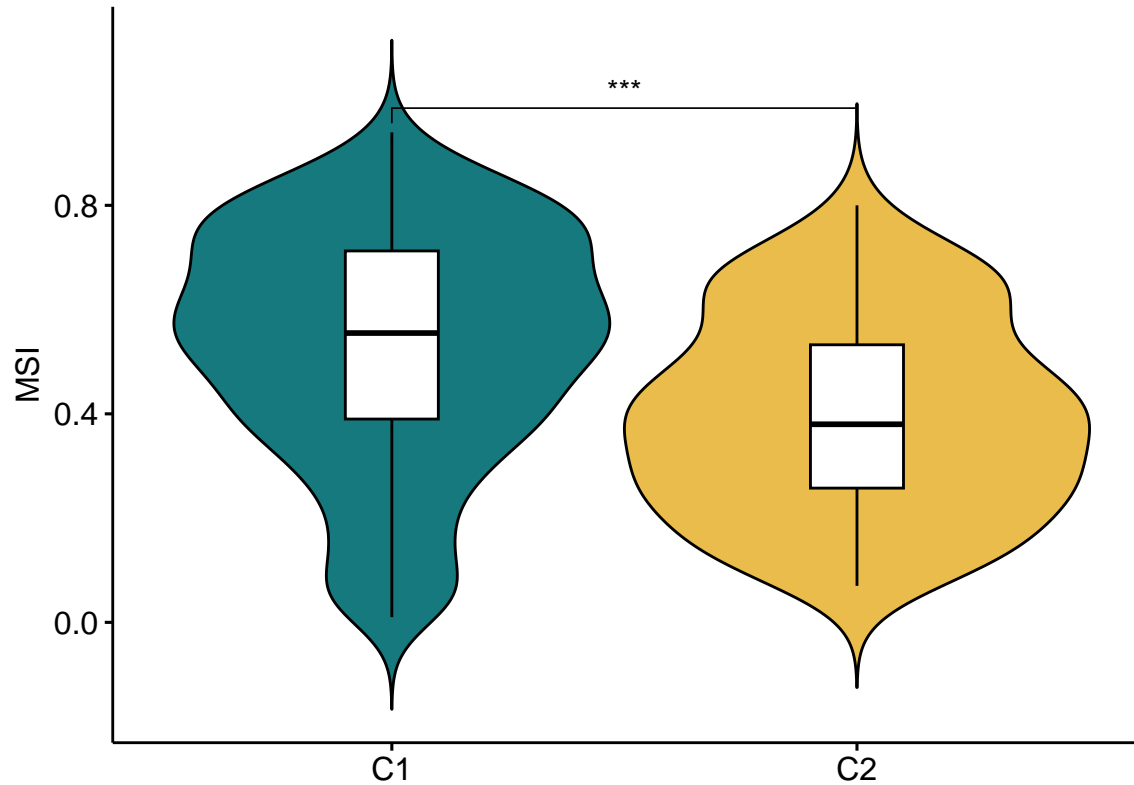

Supplement: Supplementary file 42 [file violin.MSI.pdf › original data_lgg&metabolism/16.ANN_validation/CGGA/6.TIDE/violin.MSI.pdf]

metabolismcluster C1 C2

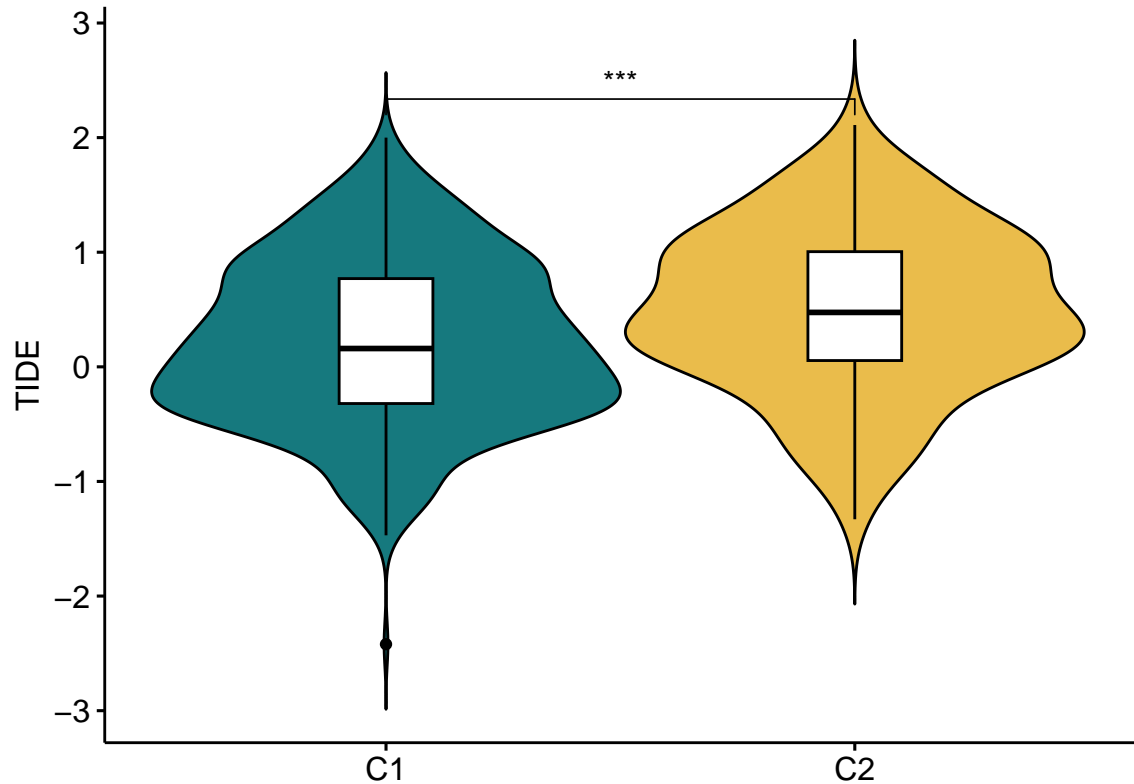

Supplement: Supplementary file 43 [file violin.TIDE.pdf › original data_lgg&metabolism/16.ANN_validation/CGGA/6.TIDE/violin.TIDE.pdf]

metabolismcluster C1 C2

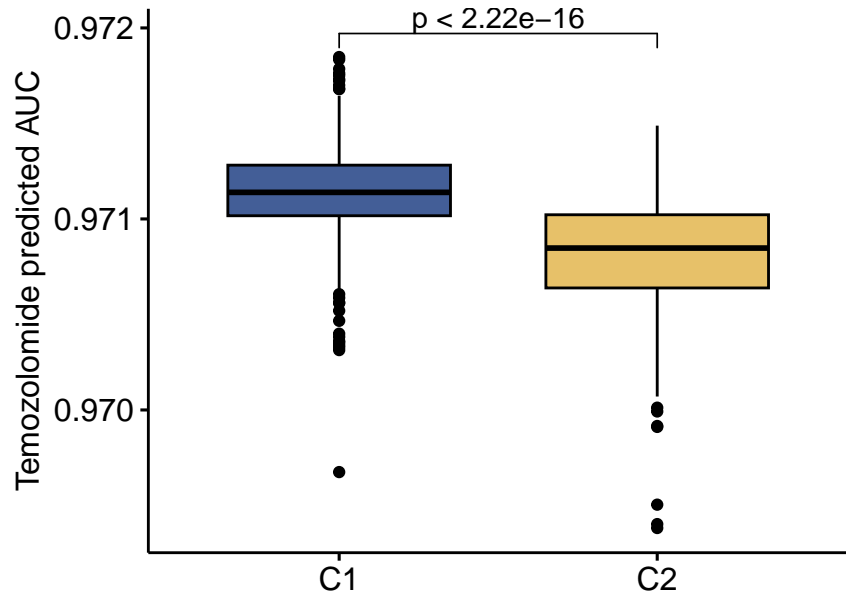

Supplement: Supplementary file 44 [file drugSenstivity.Temozolomide.pdf › original data_lgg&metabolism/16.ANN_validation/CGGA/7.drugsens/oncoPredict/boxplot/drugSenstivity.Temozolomide.pdf]

metabolismcluster C1 C2

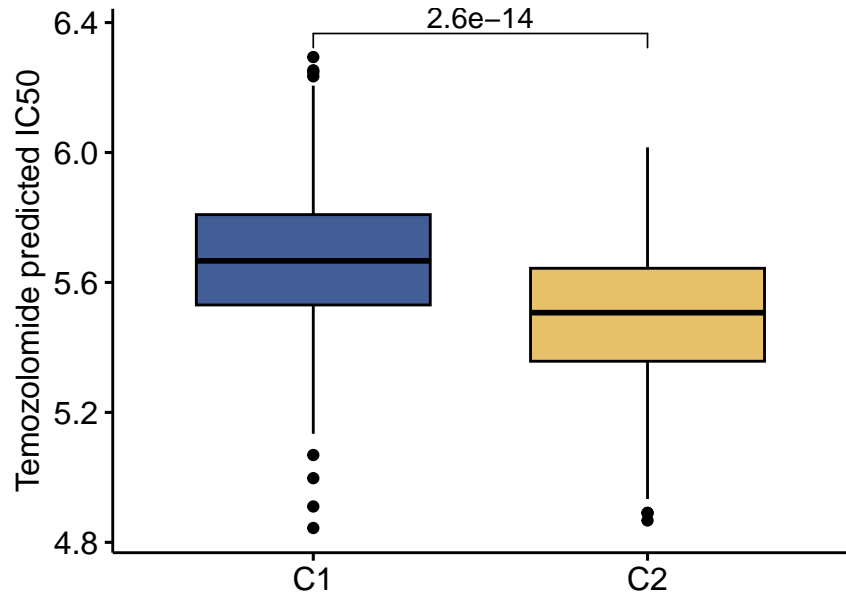

Supplement: Supplementary file 45 [file drugSenstivity.Temozolomide.pdf › original data_lgg&metabolism/16.ANN_validation/CGGA/7.drugsens/pRRophetic/drugSenstivity.Temozolomide.pdf]

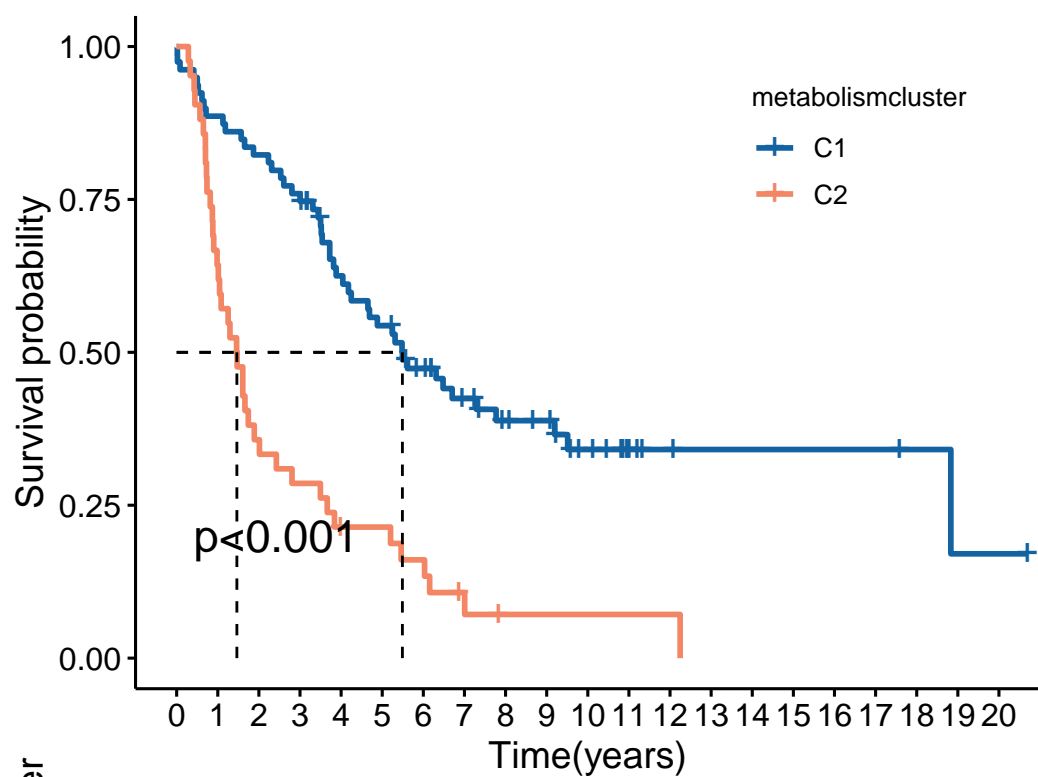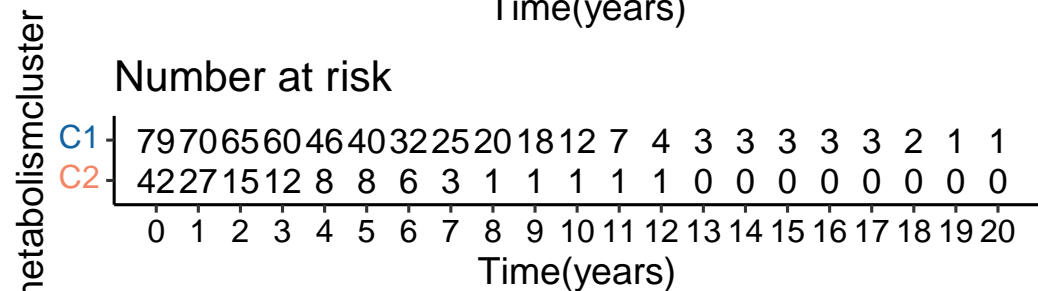

Supplement: Supplementary file 49 [file survival.pdf › original data_lgg&metabolism/16.ANN_validation/Rembrandt/4.Sur/survival.pdf]

Percent weight

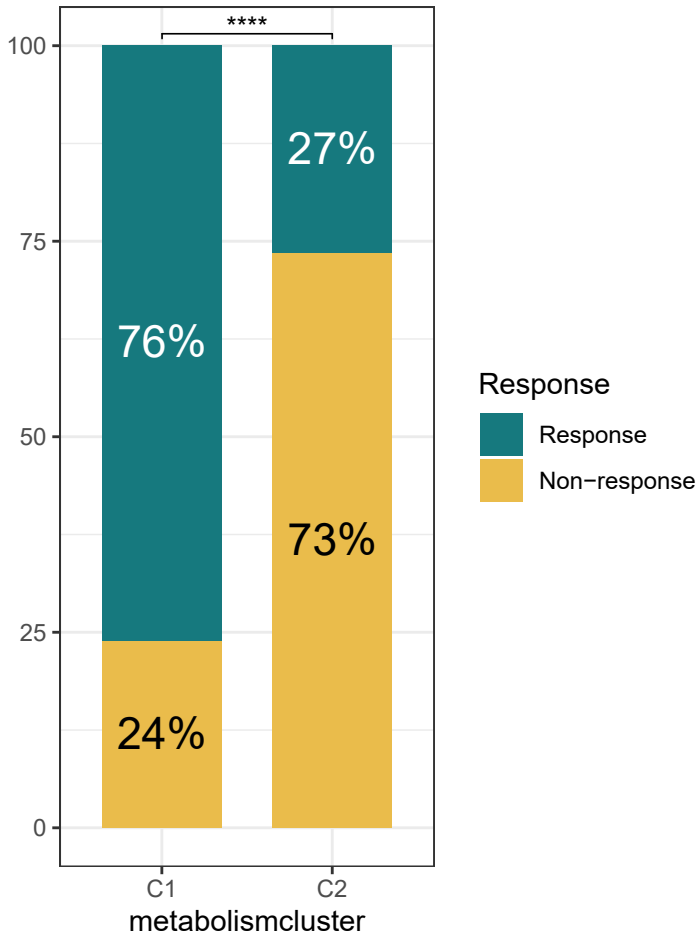

Supplement: Supplementary file 50 [file barplot.pdf › original data_lgg&metabolism/16.ANN_validation/Rembrandt/5.TIDE/barplot.pdf]

metabolismcluster



C1

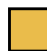

C2

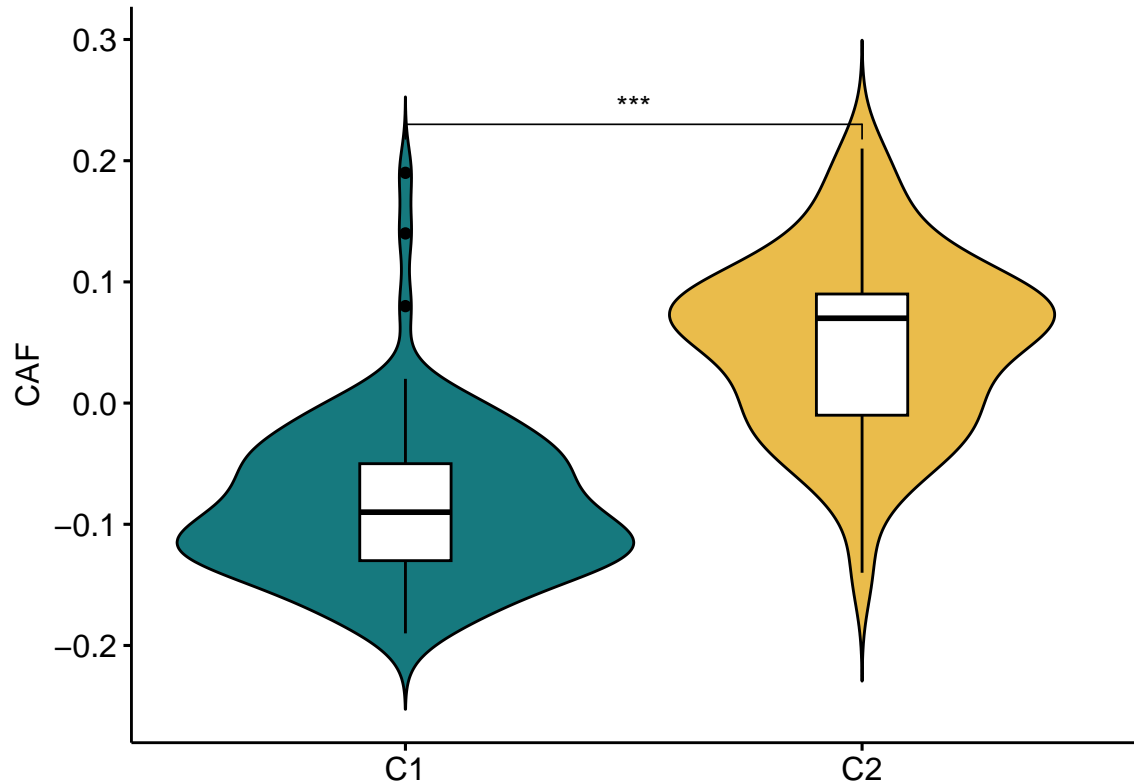

Supplement: Supplementary file 51 [file violin.CAF.pdf › original data_lgg&metabolism/16.ANN_validation/Rembrandt/5.TIDE/violin.CAF.pdf]

metabolismcluster C1 C2

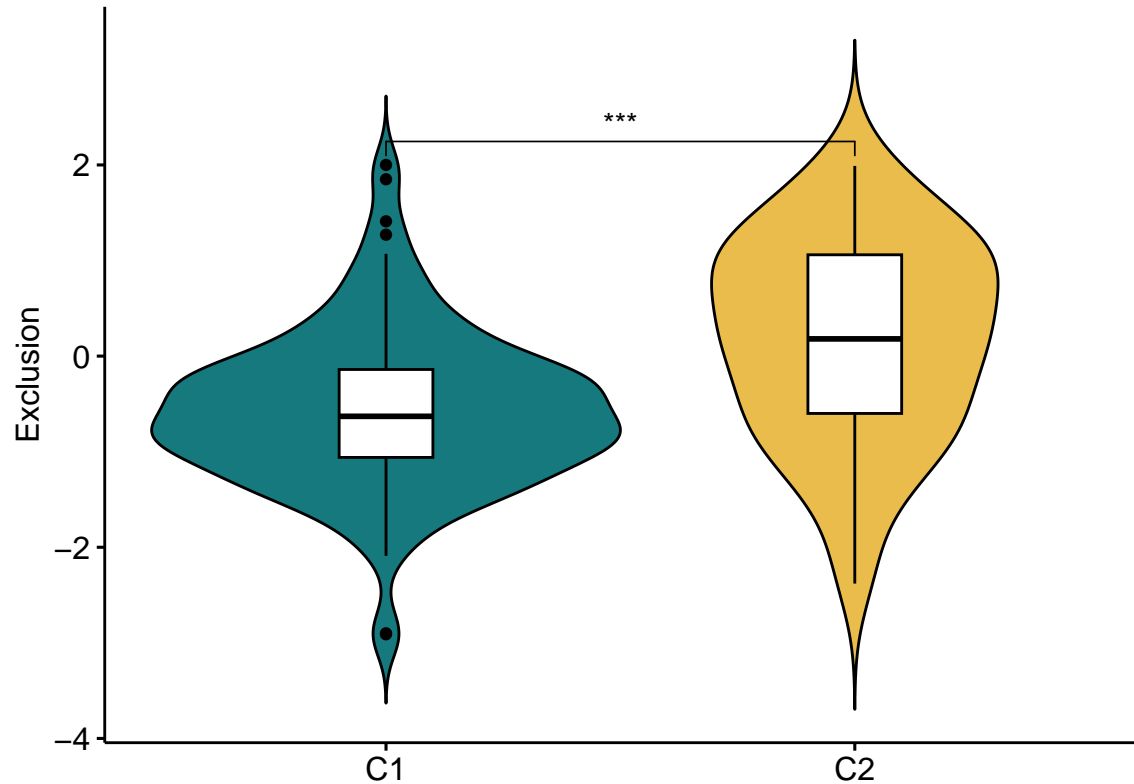

Supplement: Supplementary file 52 [file violin.Exclusion.pdf › original data_lgg&metabolism/16.ANN_validation/Rembrandt/5.TIDE/violin.Exclusion.pdf]

metabolismcluster

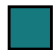

C1

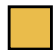

C2

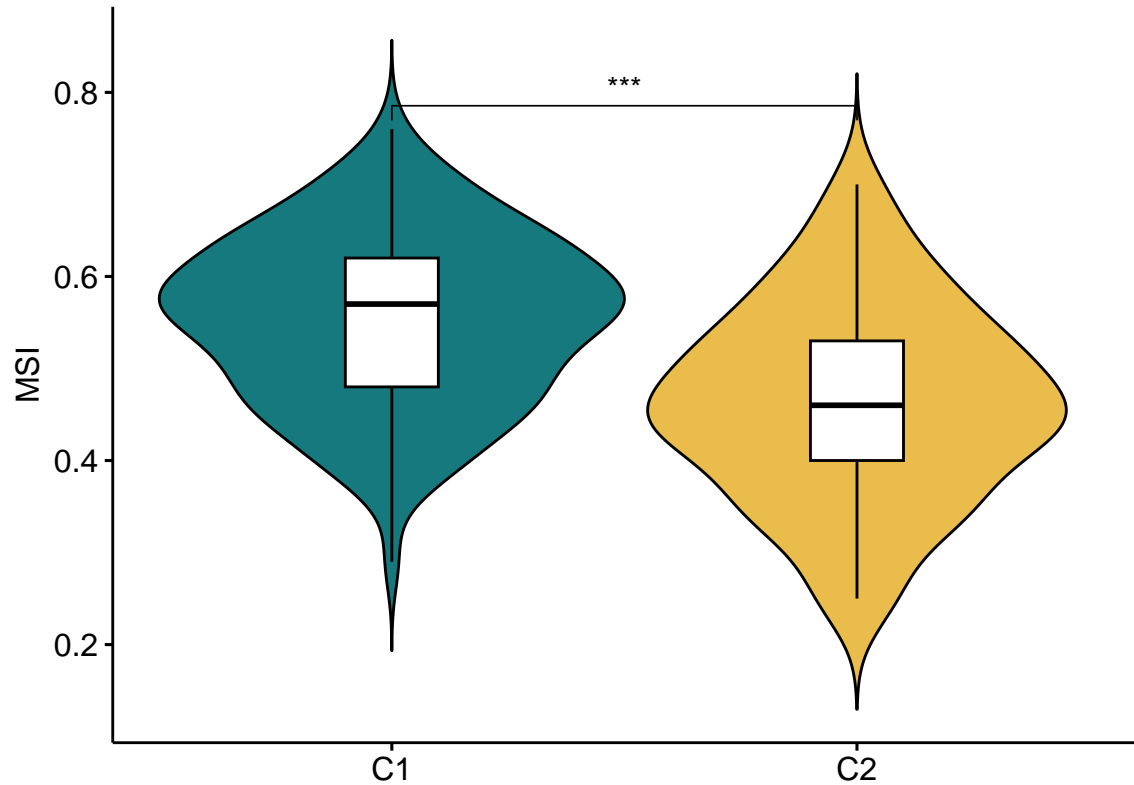

Supplement: Supplementary file 53 [file violin.MSI.pdf › original data_lgg&metabolism/16.ANN_validation/Rembrandt/5.TIDE/violin.MSI.pdf]

metabolismcluster C1 C2

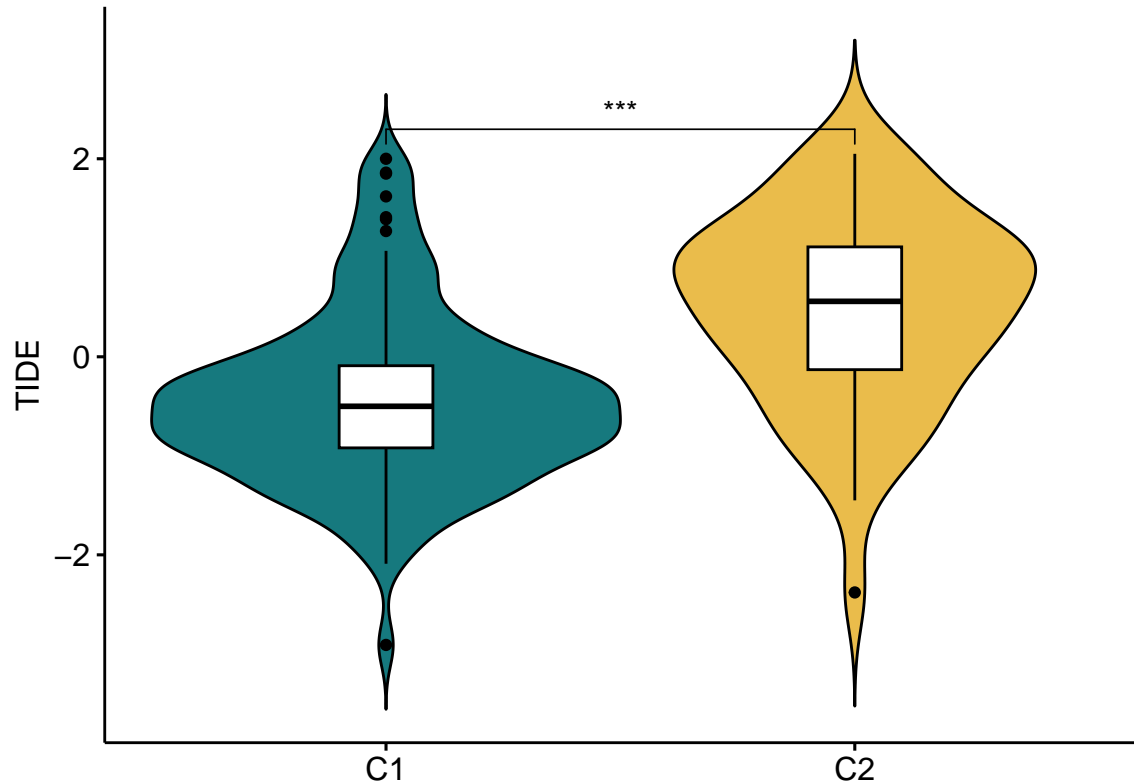

Supplement: Supplementary file 54 [file violin.TIDE.pdf › original data_lgg&metabolism/16.ANN_validation/Rembrandt/5.TIDE/violin.TIDE.pdf]

metabolismcluster C1 C2

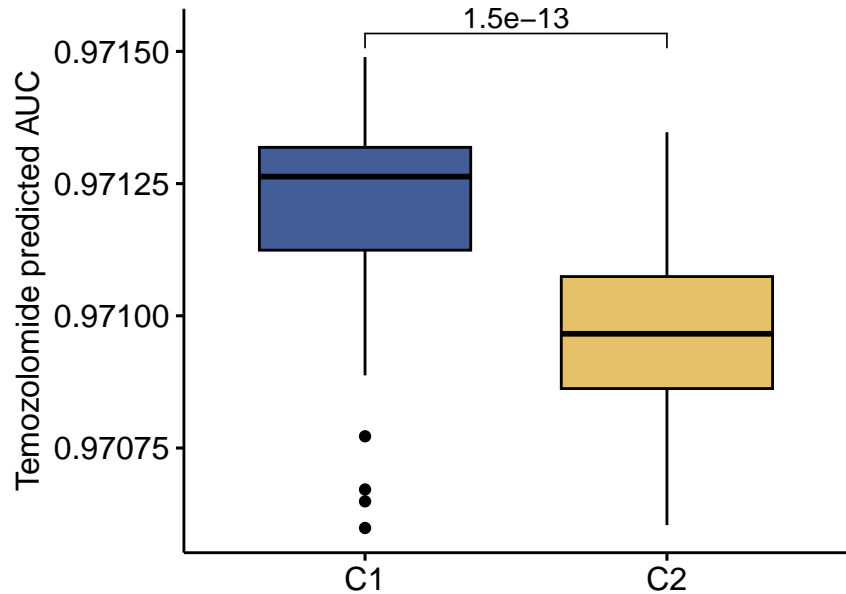

Supplement: Supplementary file 55 [file drugSenstivity.Temozolomide.pdf › original data_lgg&metabolism/16.ANN_validation/Rembrandt/6.drugsens/oncoPredict/boxplot/drugSenstivity.Temozolomide.pdf]

metabolismcluster C1 C2

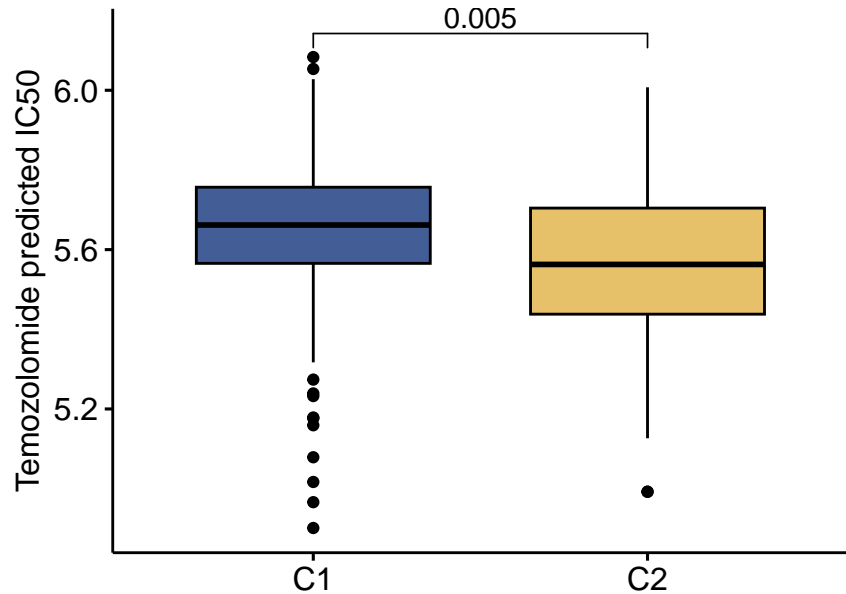

Supplement: Supplementary file 56 [file drugSenstivity.Temozolomide.pdf › original data_lgg&metabolism/16.ANN_validation/Rembrandt/6.drugsens/pRRophetic/drugSenstivity.Temozolomide.pdf]

metabolismcluster C1 C2

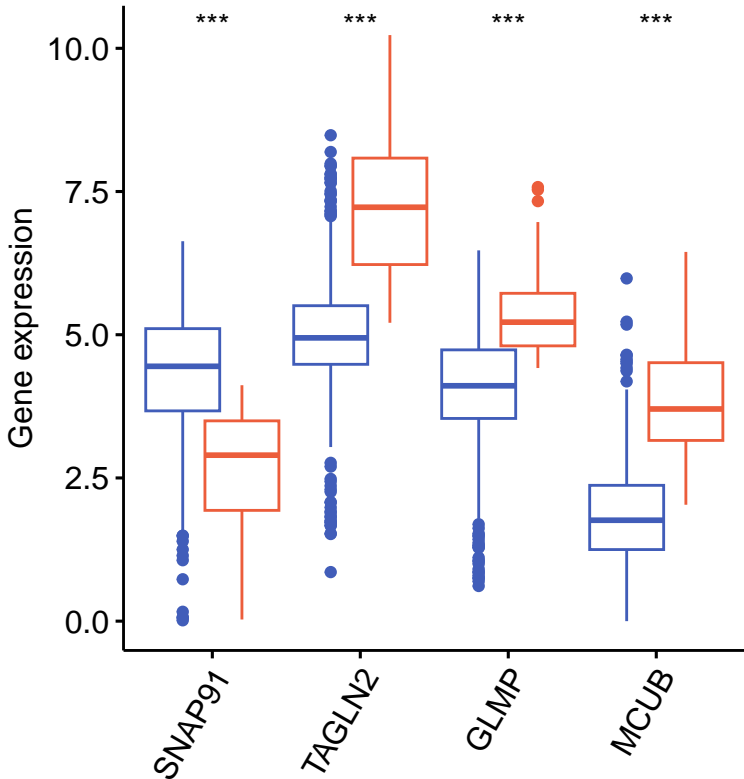

Supplement: Supplementary file 57 [file boxplot.pdf › original data_lgg&metabolism/17.Model_gene/1.ClusterDiff/CGGA/boxplot.pdf]

metabolismcluster C1 C2

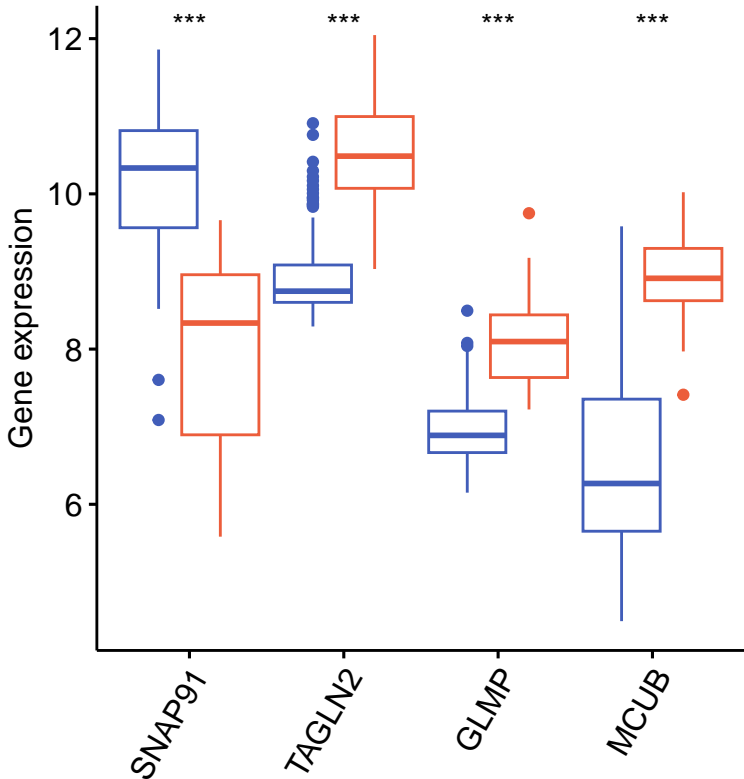

Supplement: Supplementary file 58 [file boxplot.pdf › original data_lgg&metabolism/17.Model_gene/1.ClusterDiff/Rembrandt/boxplot.pdf]

metabolismcluster C1 C2

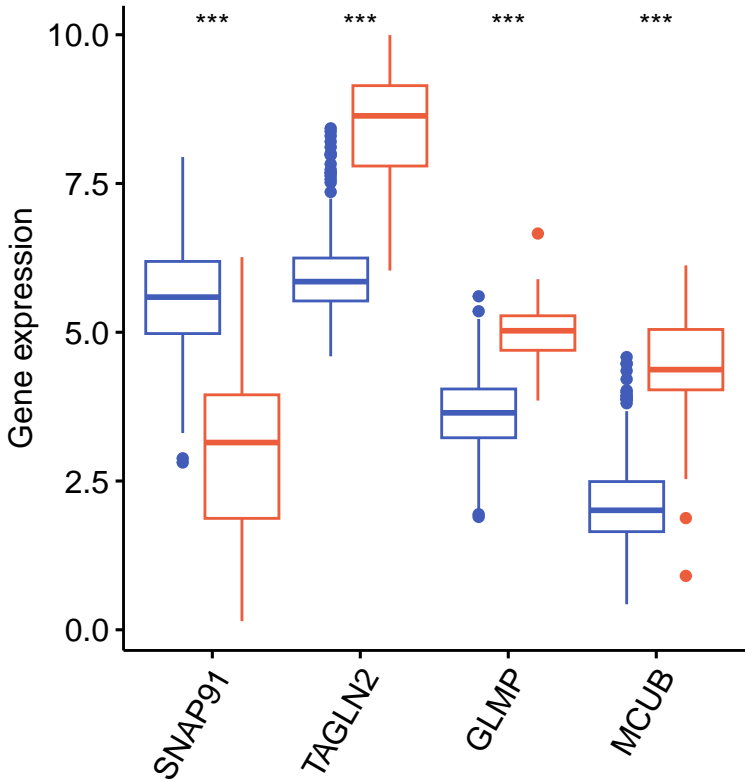

Supplement: Supplementary file 59 [file boxplot.pdf › original data_lgg&metabolism/17.Model_gene/1.ClusterDiff/TCGA/boxplot.pdf]

# GLMP ROC Curve

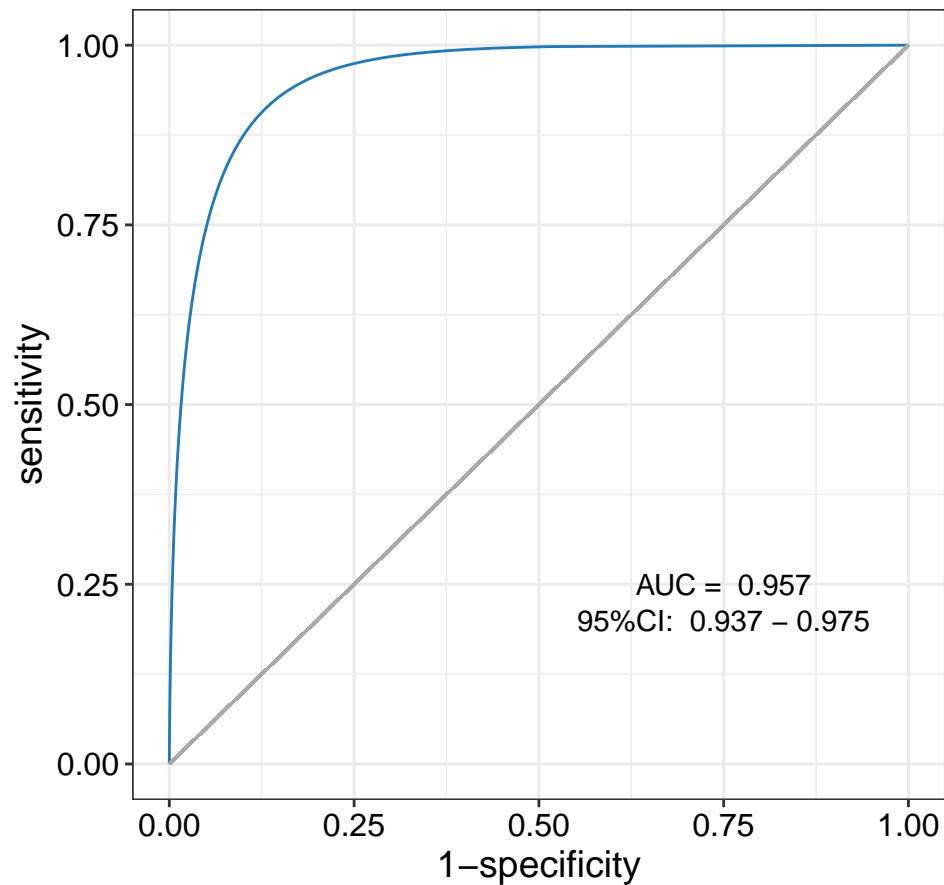

Supplement: Supplementary file 60 [file ROC.GLMP.pdf › original data_lgg&metabolism/17.Model_gene/2.singleROC/ROC.GLMP.pdf]

# MCUB ROC Curve

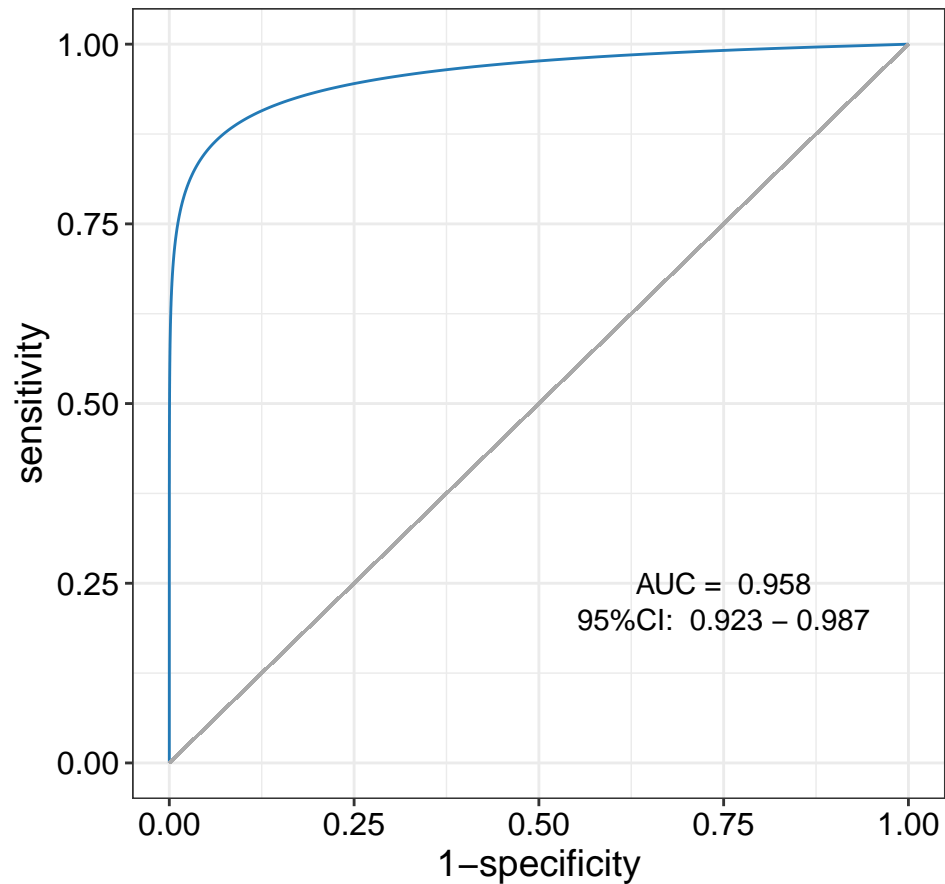

Supplement: Supplementary file 61 [file ROC.MCUB.pdf › original data_lgg&metabolism/17.Model_gene/2.singleROC/ROC.MCUB.pdf]

# SNAP91 ROC Curve

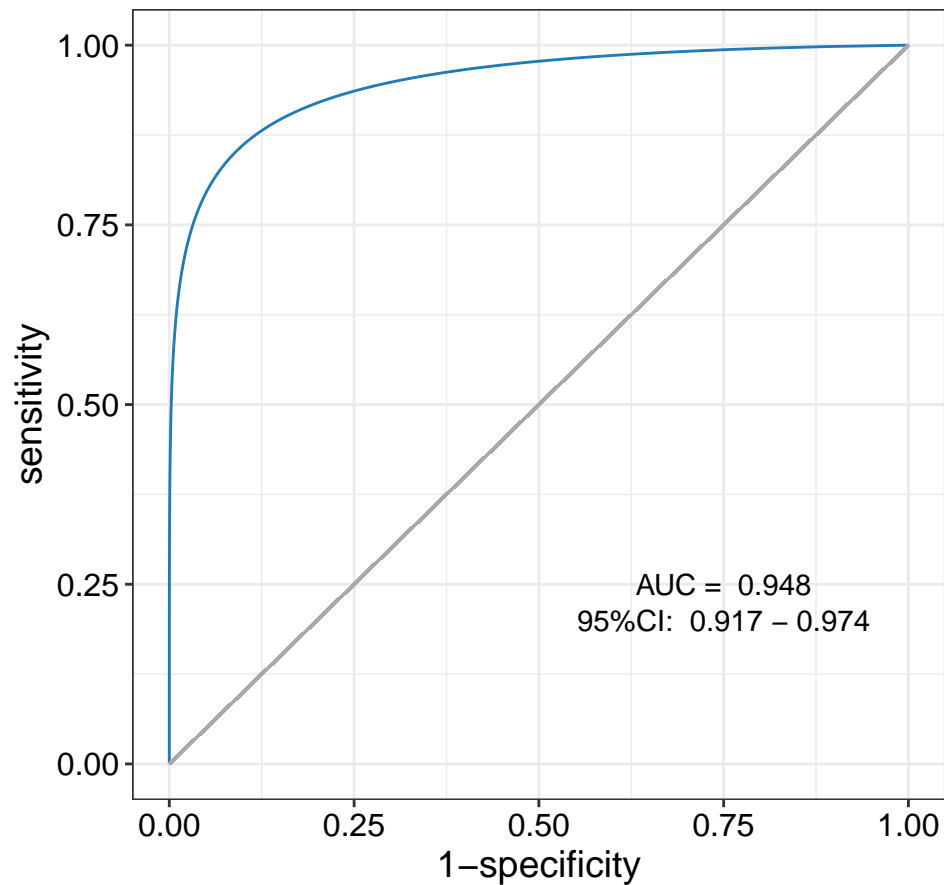

Supplement: Supplementary file 62 [file ROC.SNAP91.pdf › original data_lgg&metabolism/17.Model_gene/2.singleROC/ROC.SNAP91.pdf]

# TAGLN2 ROC Curve

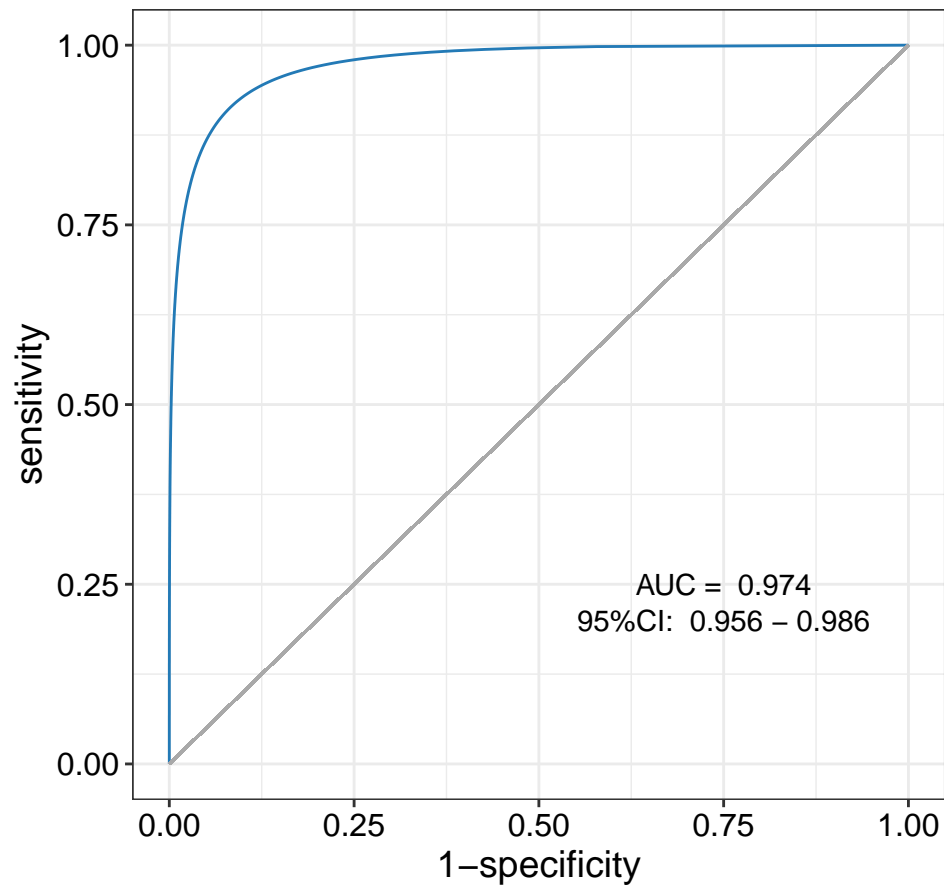

Supplement: Supplementary file 63 [file ROC.TAGLN2.pdf › original data_lgg&metabolism/17.Model_gene/2.singleROC/ROC.TAGLN2.pdf]

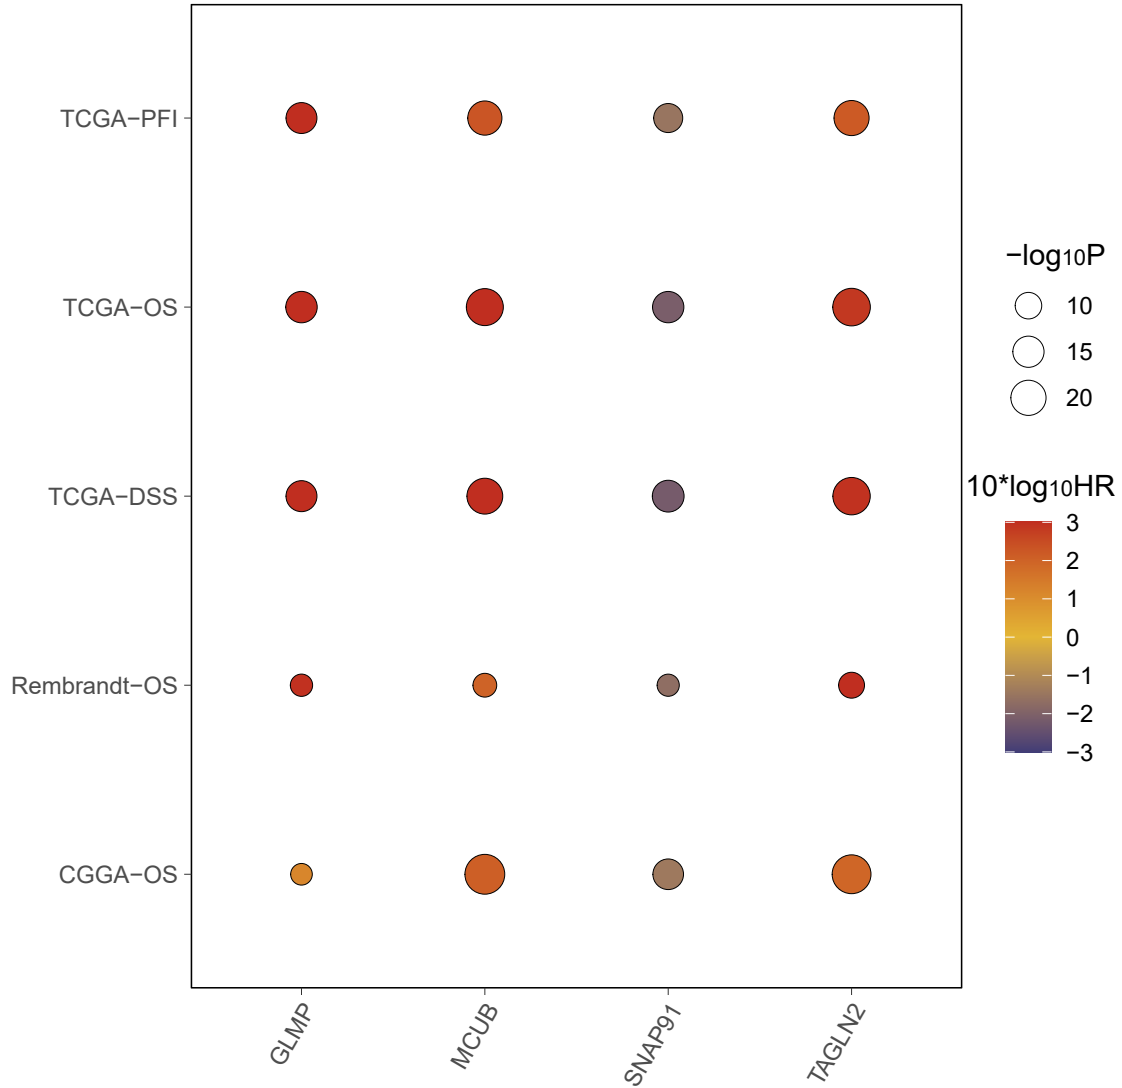

Supplement: Supplementary file 64 [file -log10Cox.pdf › original data_lgg&metabolism/17.Model_gene/3.Survival/-log10Cox.pdf]

GLMP + high + low

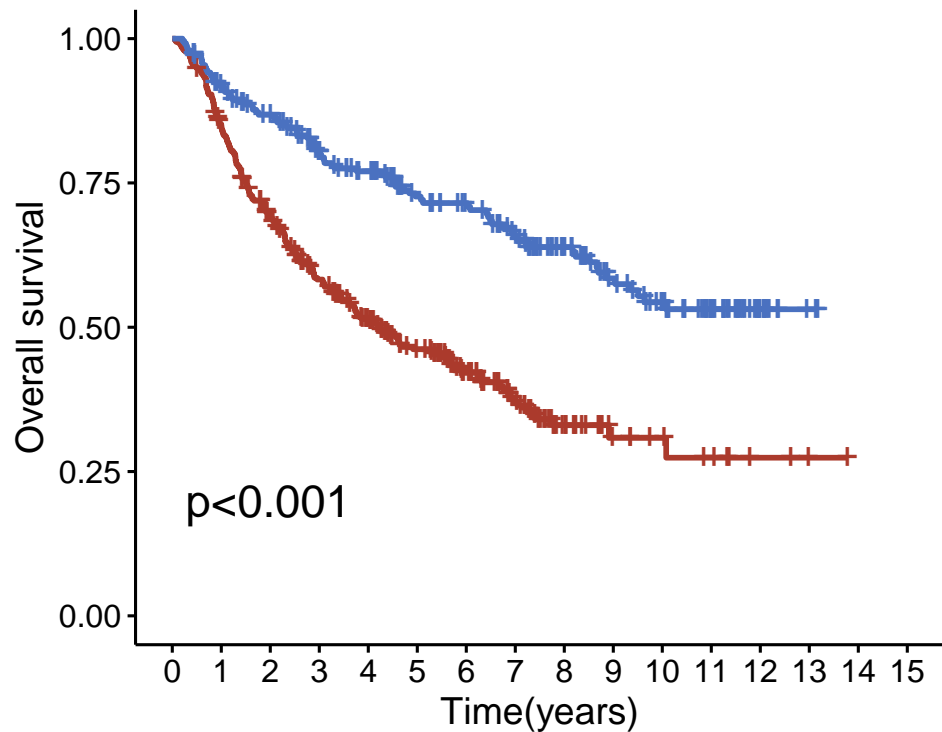

Supplement: Supplementary file 65 [file sur.GLMP.OS.pdf › original data_lgg&metabolism/17.Model_gene/3.Survival/CGGA/sur.GLMP.OS.pdf]

MCUB + high + low

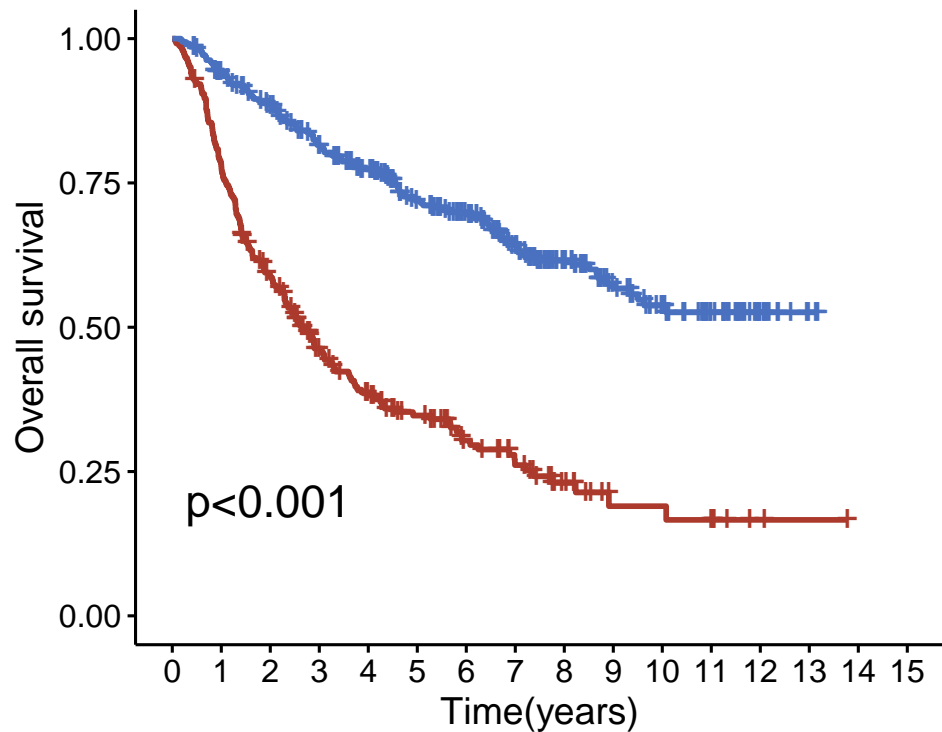

Supplement: Supplementary file 66 [file sur.MCUB.OS.pdf › original data_lgg&metabolism/17.Model_gene/3.Survival/CGGA/sur.MCUB.OS.pdf]

SNAP91    high    low

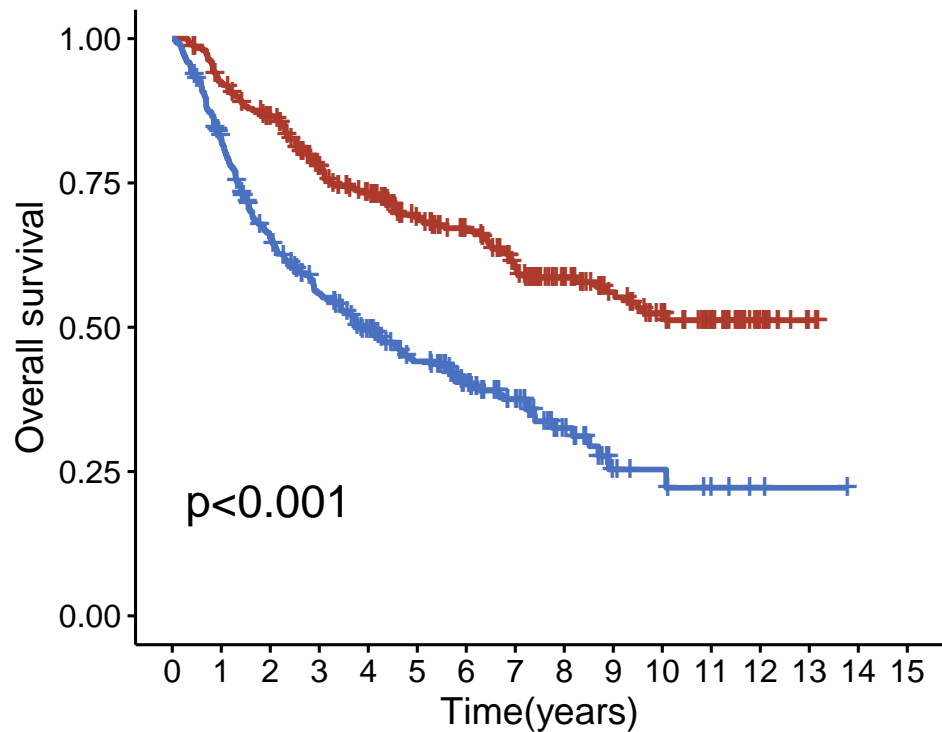

Supplement: Supplementary file 67 [file sur.SNAP91.OS.pdf › original data_lgg&metabolism/17.Model_gene/3.Survival/CGGA/sur.SNAP91.OS.pdf]

TAGLN2 + high + low

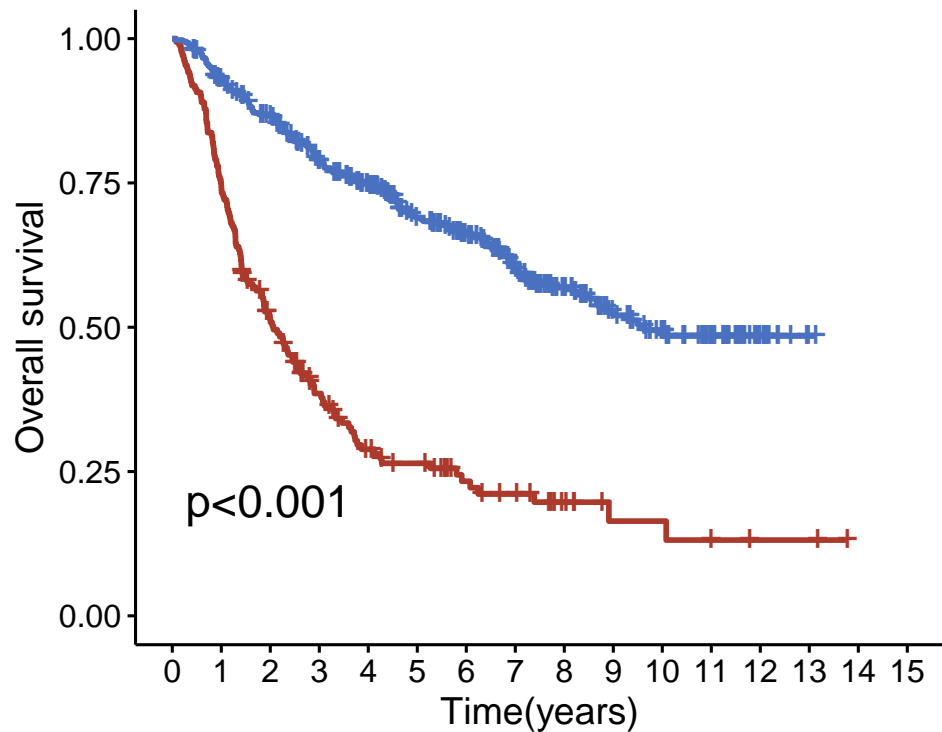

Supplement: Supplementary file 68 [file sur.TAGLN2.OS.pdf › original data_lgg&metabolism/17.Model_gene/3.Survival/CGGA/sur.TAGLN2.OS.pdf]

GLMP + high + low

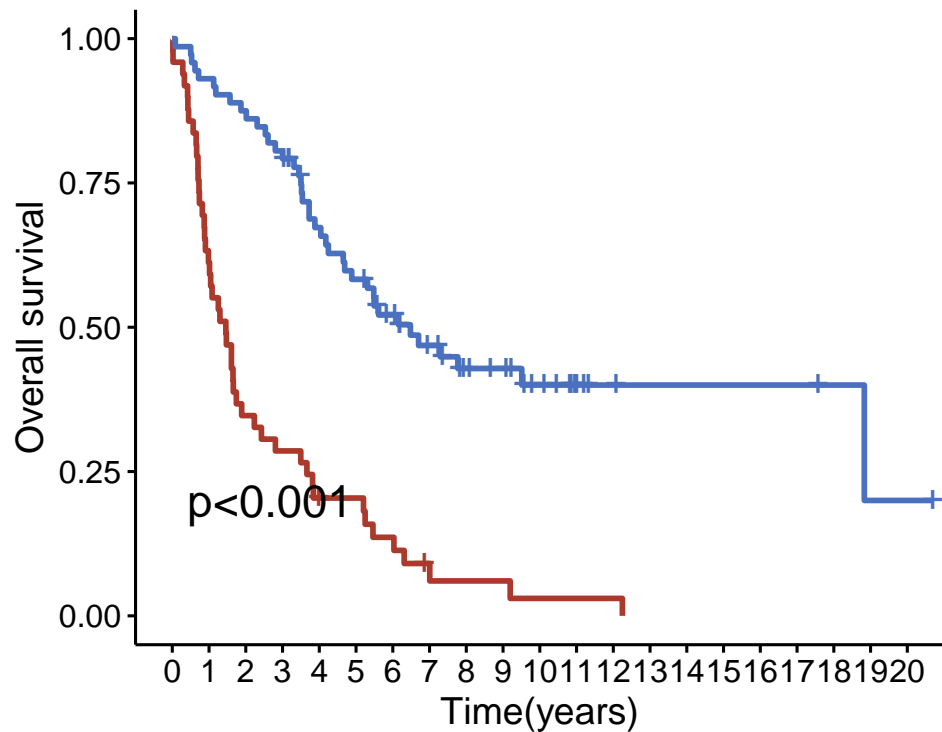

Supplement: Supplementary file 69 [file sur.GLMP.OS.pdf › original data_lgg&metabolism/17.Model_gene/3.Survival/Rembrandt/sur.GLMP.OS.pdf]

MCUB + high + low

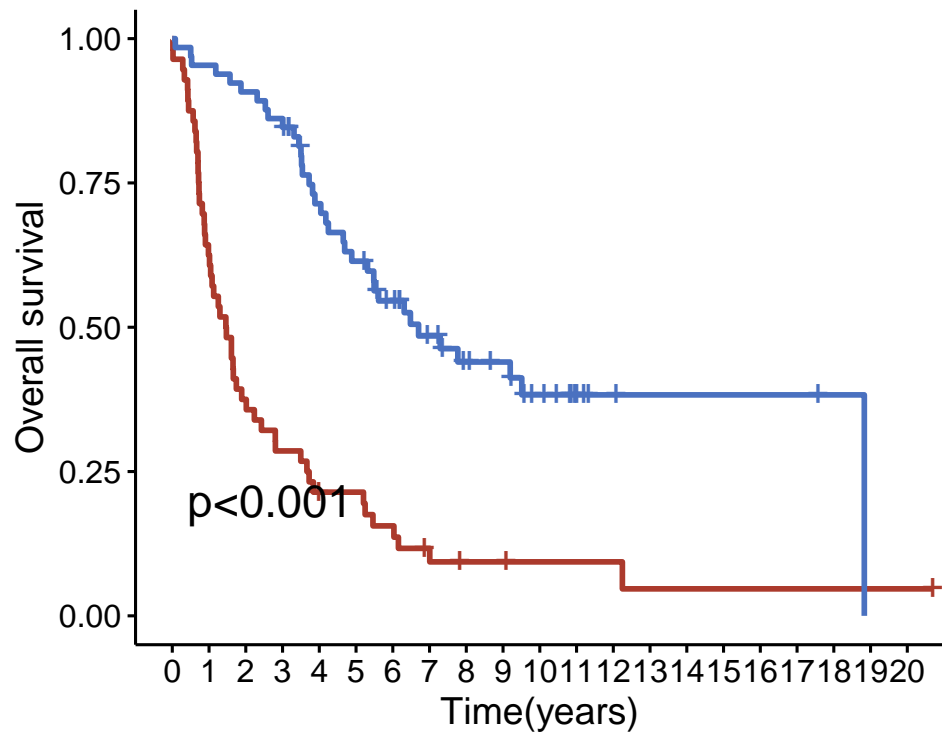

Supplement: Supplementary file 70 [file sur.MCUB.OS.pdf › original data_lgg&metabolism/17.Model_gene/3.Survival/Rembrandt/sur.MCUB.OS.pdf]

SNAP91    high    low

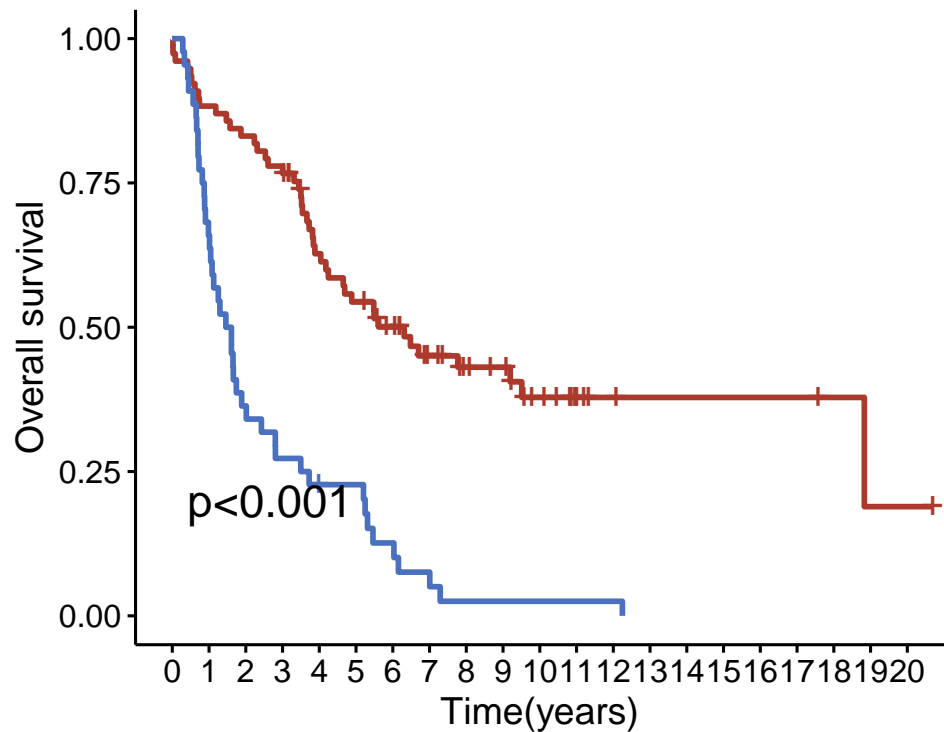

Supplement: Supplementary file 71 [file sur.SNAP91.OS.pdf › original data_lgg&metabolism/17.Model_gene/3.Survival/Rembrandt/sur.SNAP91.OS.pdf]

TAGLN2 + high + low

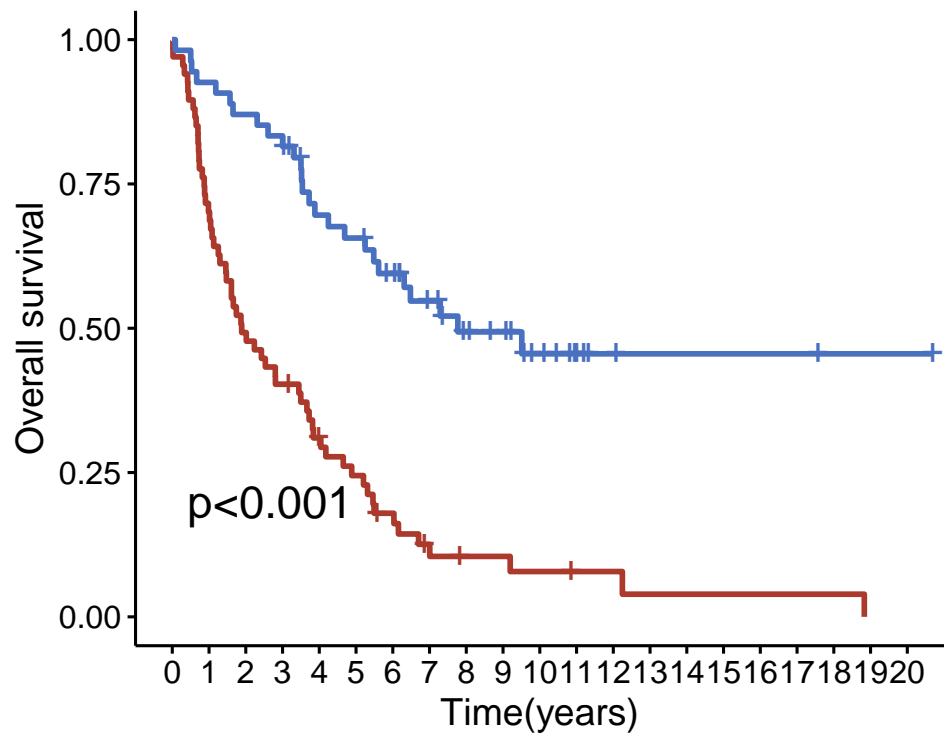

Supplement: Supplementary file 72 [file sur.TAGLN2.OS.pdf › original data_lgg&metabolism/17.Model_gene/3.Survival/Rembrandt/sur.TAGLN2.OS.pdf]

GLMP + high + low

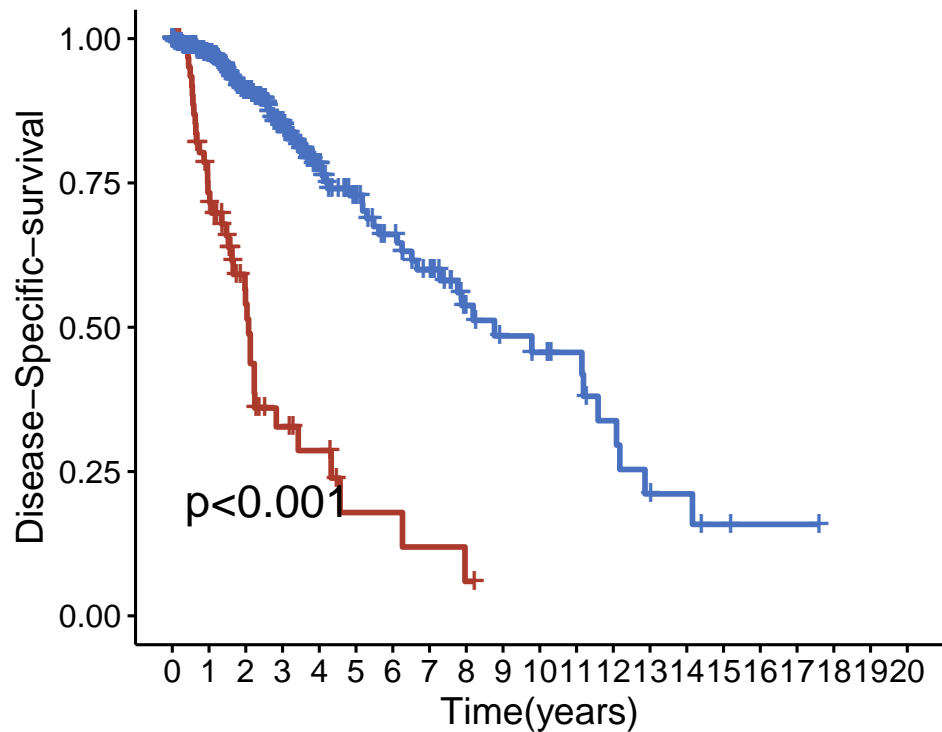

Supplement: Supplementary file 73 [file sur.GLMP.DSS.pdf › original data_lgg&metabolism/17.Model_gene/3.Survival/TCGA/sur.GLMP.DSS.pdf]

GLMP + high + low

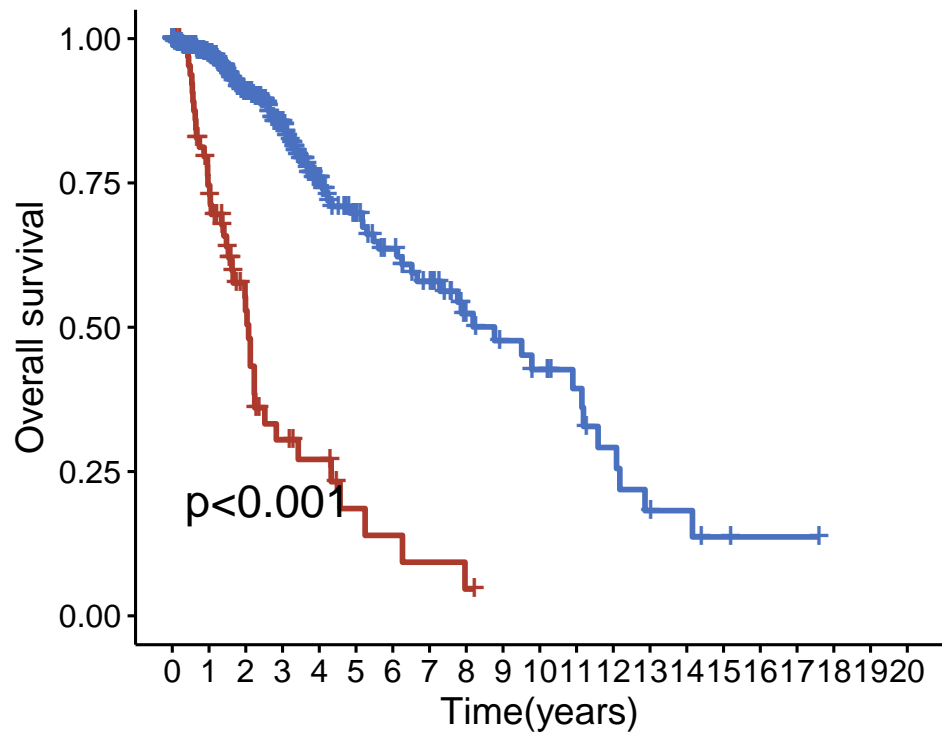

Supplement: Supplementary file 74 [file sur.GLMP.OS.pdf › original data_lgg&metabolism/17.Model_gene/3.Survival/TCGA/sur.GLMP.OS.pdf]

GLMP + high + low

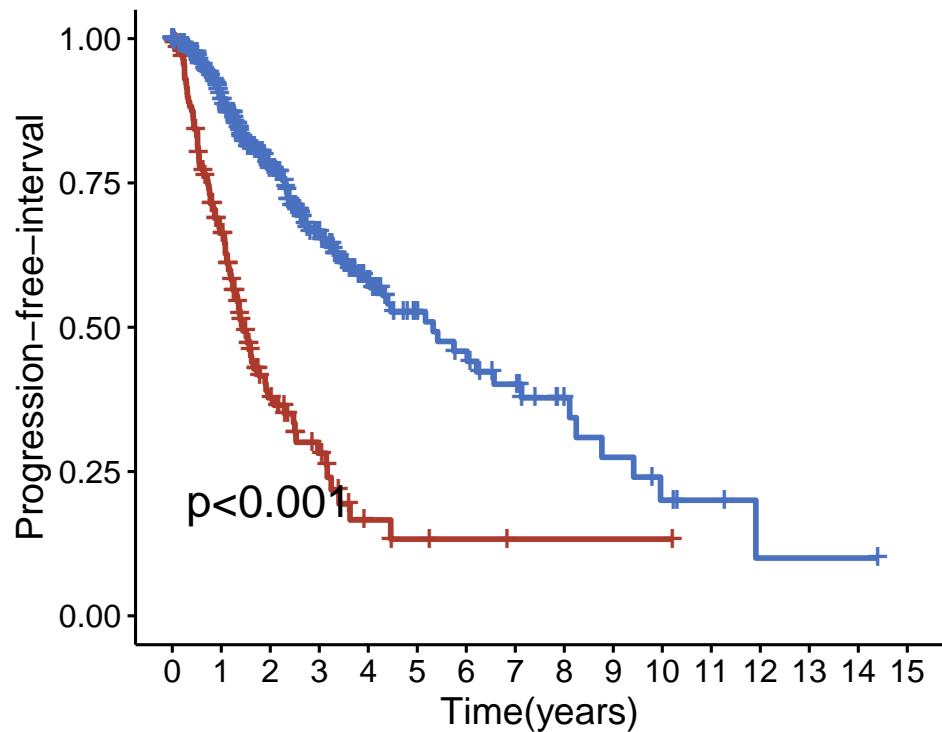

Supplement: Supplementary file 75 [file sur.GLMP.PFI.pdf › original data_lgg&metabolism/17.Model_gene/3.Survival/TCGA/sur.GLMP.PFI.pdf]

MCUB + high + low

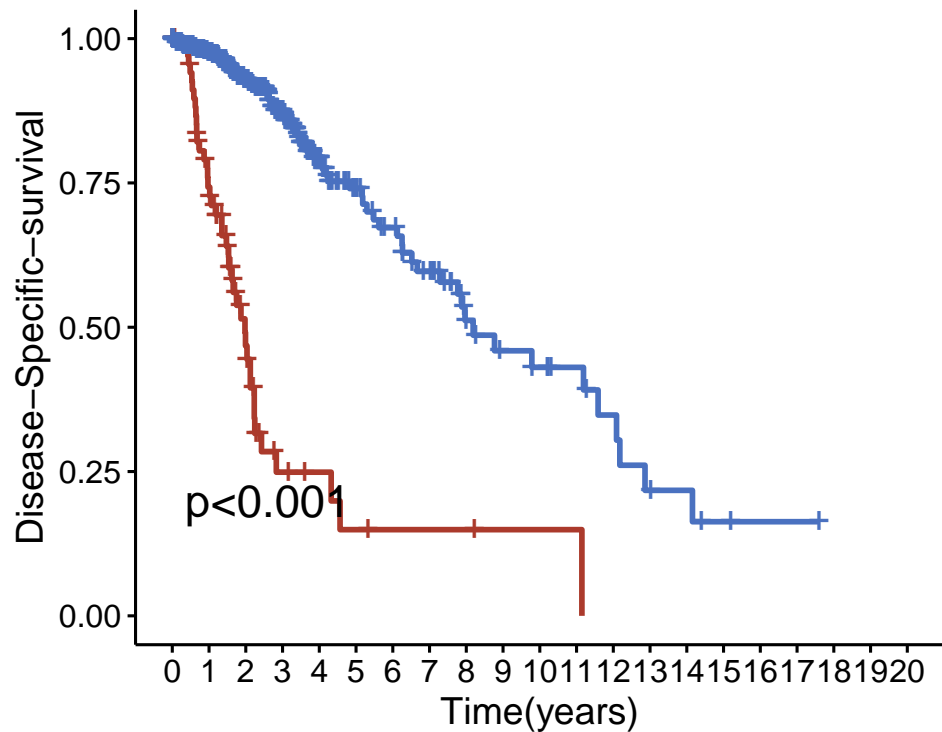

Supplement: Supplementary file 76 [file sur.MCUB.DSS.pdf › original data_lgg&metabolism/17.Model_gene/3.Survival/TCGA/sur.MCUB.DSS.pdf]

MCUB + high + low

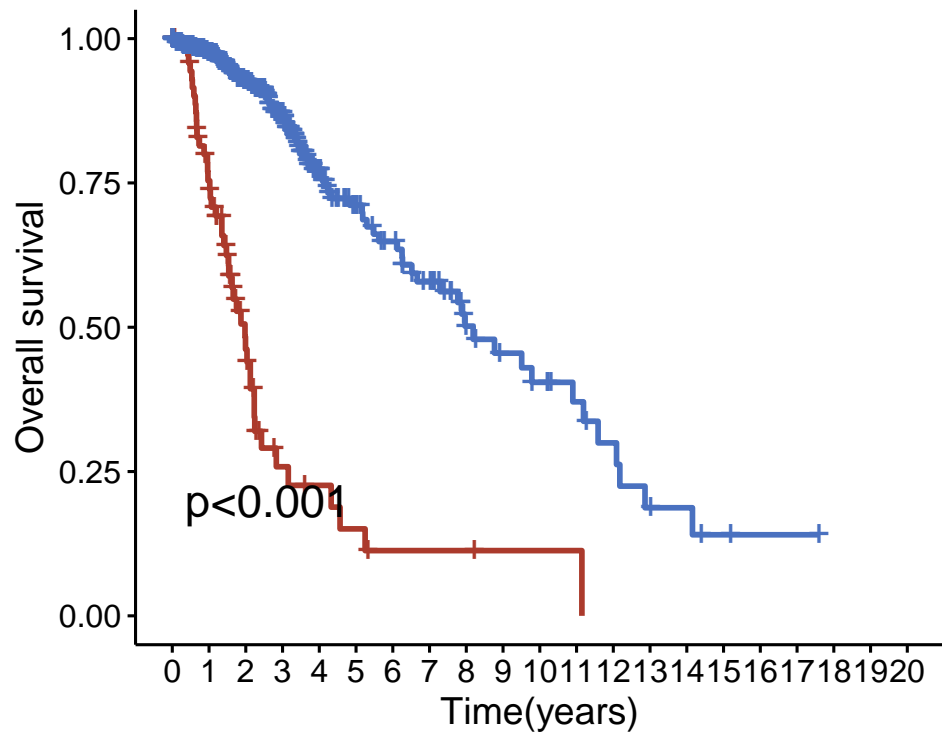

Supplement: Supplementary file 77 [file sur.MCUB.OS.pdf › original data_lgg&metabolism/17.Model_gene/3.Survival/TCGA/sur.MCUB.OS.pdf]

MCUB + high + low

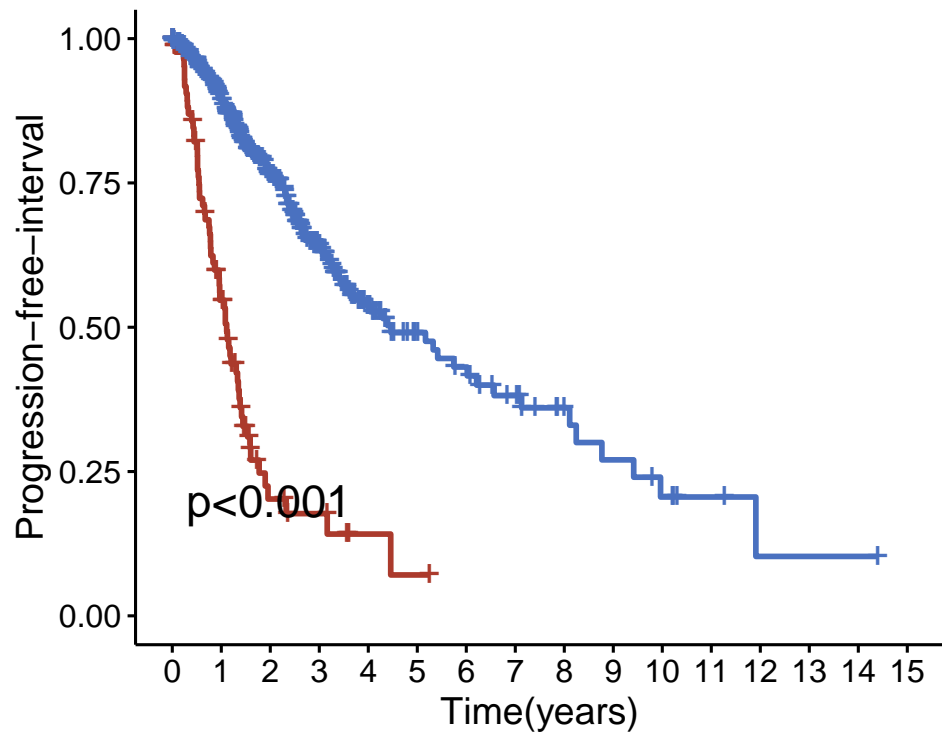

Supplement: Supplementary file 78 [file sur.MCUB.PFI.pdf › original data_lgg&metabolism/17.Model_gene/3.Survival/TCGA/sur.MCUB.PFI.pdf]

SNAP91    high    low

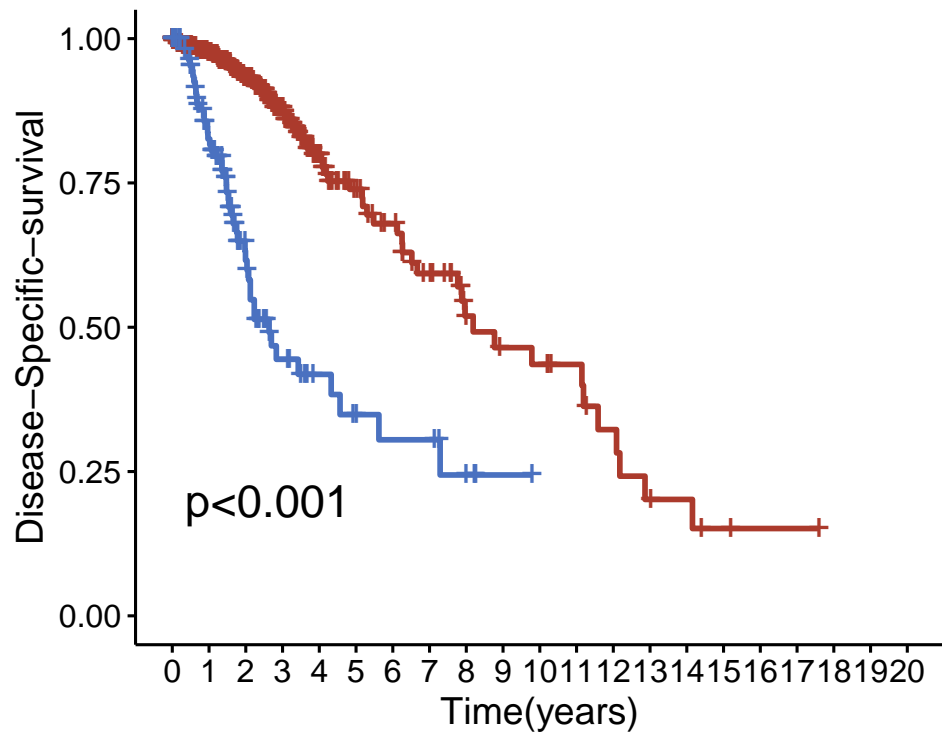

Supplement: Supplementary file 79 [file sur.SNAP91.DSS.pdf › original data_lgg&metabolism/17.Model_gene/3.Survival/TCGA/sur.SNAP91.DSS.pdf]

SNAP91    high    low

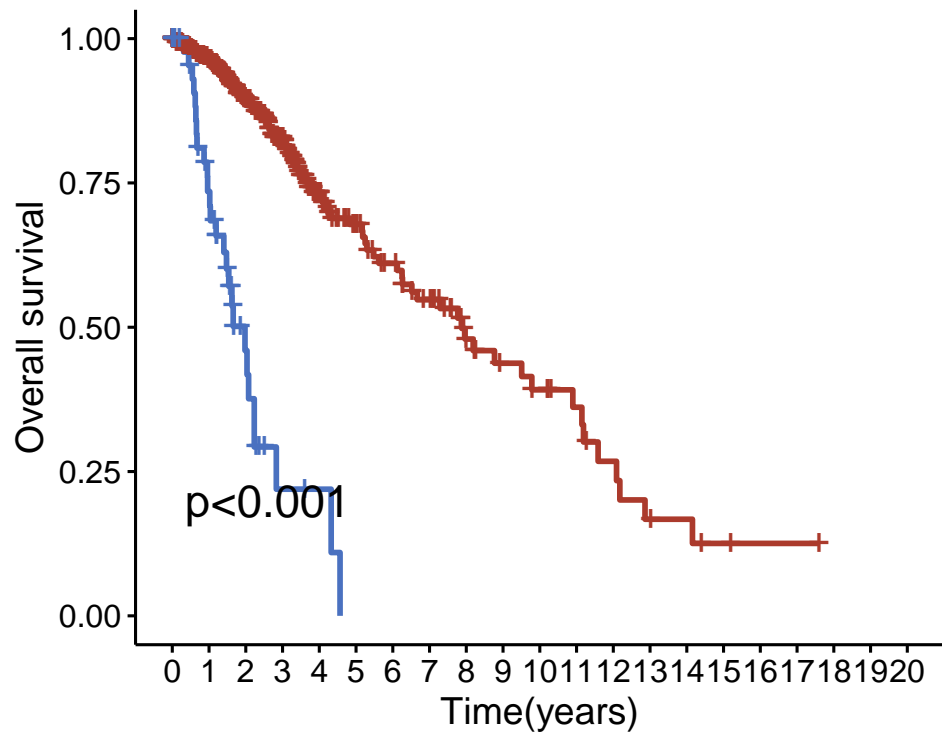

Supplement: Supplementary file 80 [file sur.SNAP91.OS.pdf › original data_lgg&metabolism/17.Model_gene/3.Survival/TCGA/sur.SNAP91.OS.pdf]

SNAP91    high    low

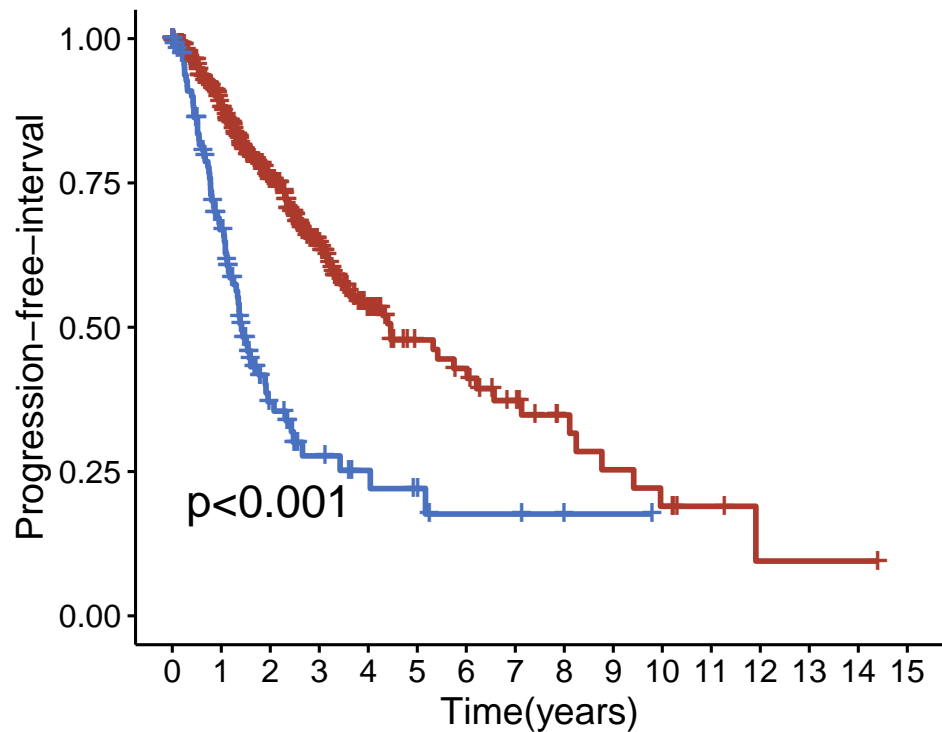

Supplement: Supplementary file 81 [file sur.SNAP91.PFI.pdf › original data_lgg&metabolism/17.Model_gene/3.Survival/TCGA/sur.SNAP91.PFI.pdf]

TAGLN2    high    low

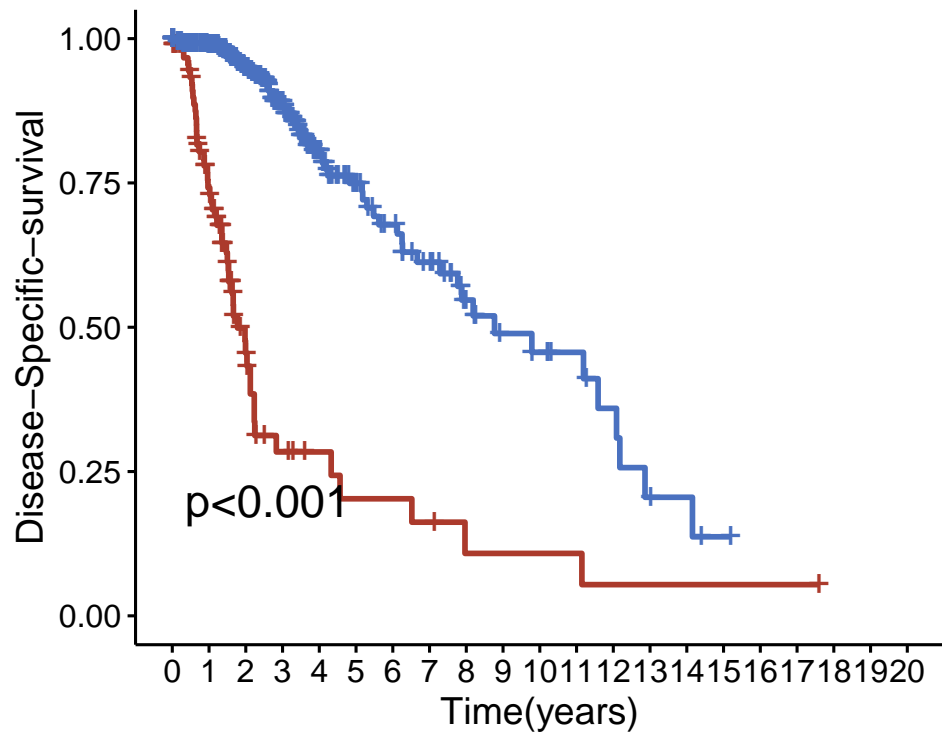

Supplement: Supplementary file 82 [file sur.TAGLN2.DSS.pdf › original data_lgg&metabolism/17.Model_gene/3.Survival/TCGA/sur.TAGLN2.DSS.pdf]

TAGLN2 + high + low

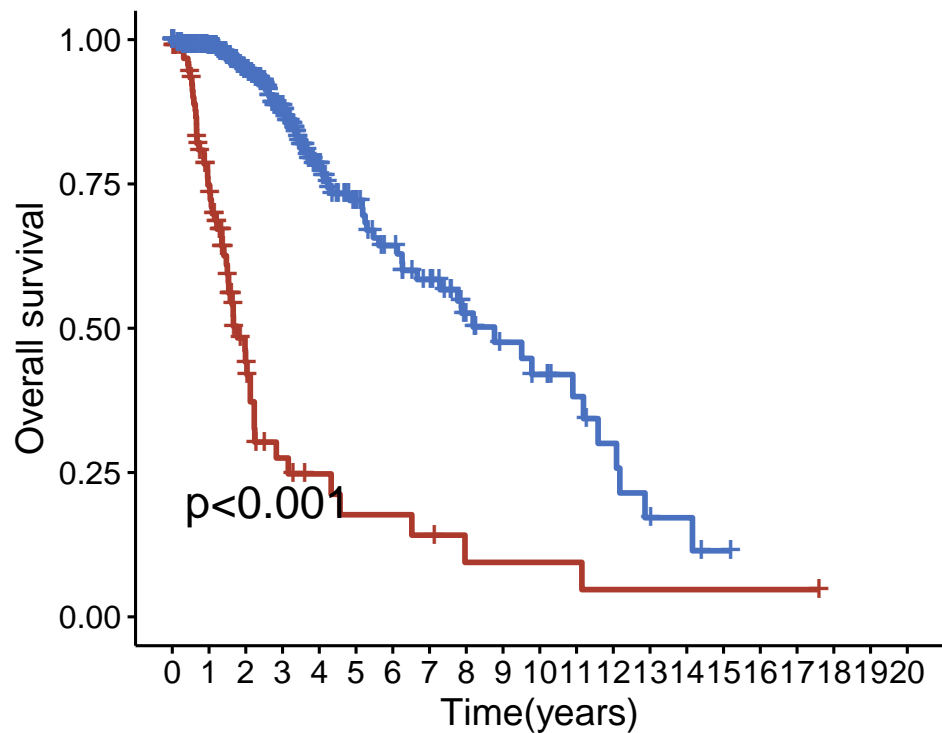

Supplement: Supplementary file 83 [file sur.TAGLN2.OS.pdf › original data_lgg&metabolism/17.Model_gene/3.Survival/TCGA/sur.TAGLN2.OS.pdf]

TAGLN2    high    low

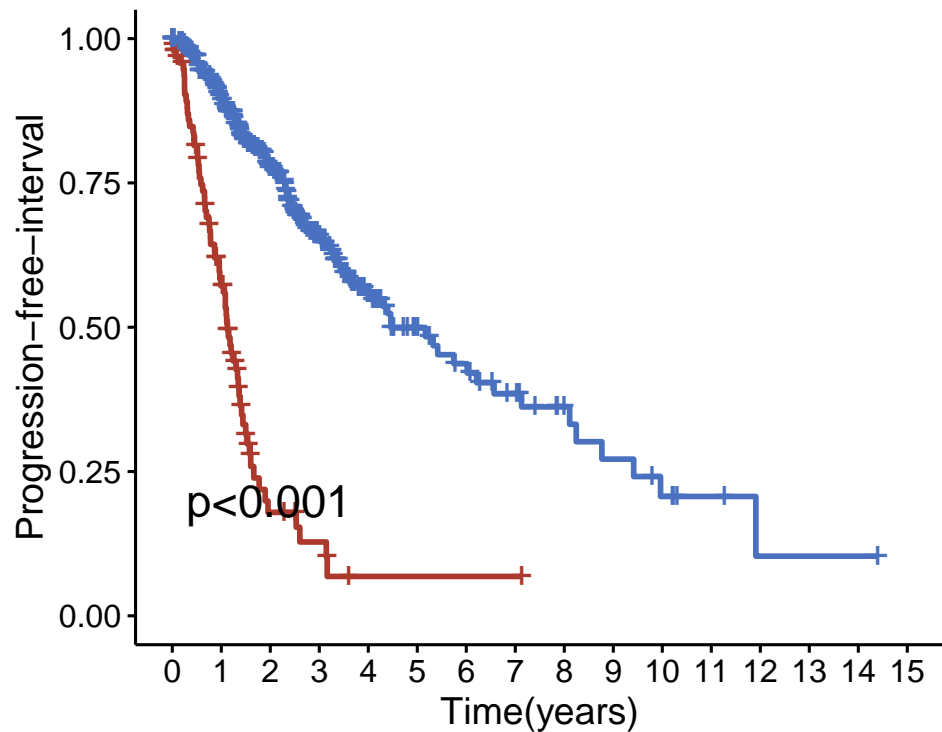

Supplement: Supplementary file 84 [file sur.TAGLN2.PFI.pdf › original data_lgg&metabolism/17.Model_gene/3.Survival/TCGA/sur.TAGLN2.PFI.pdf]

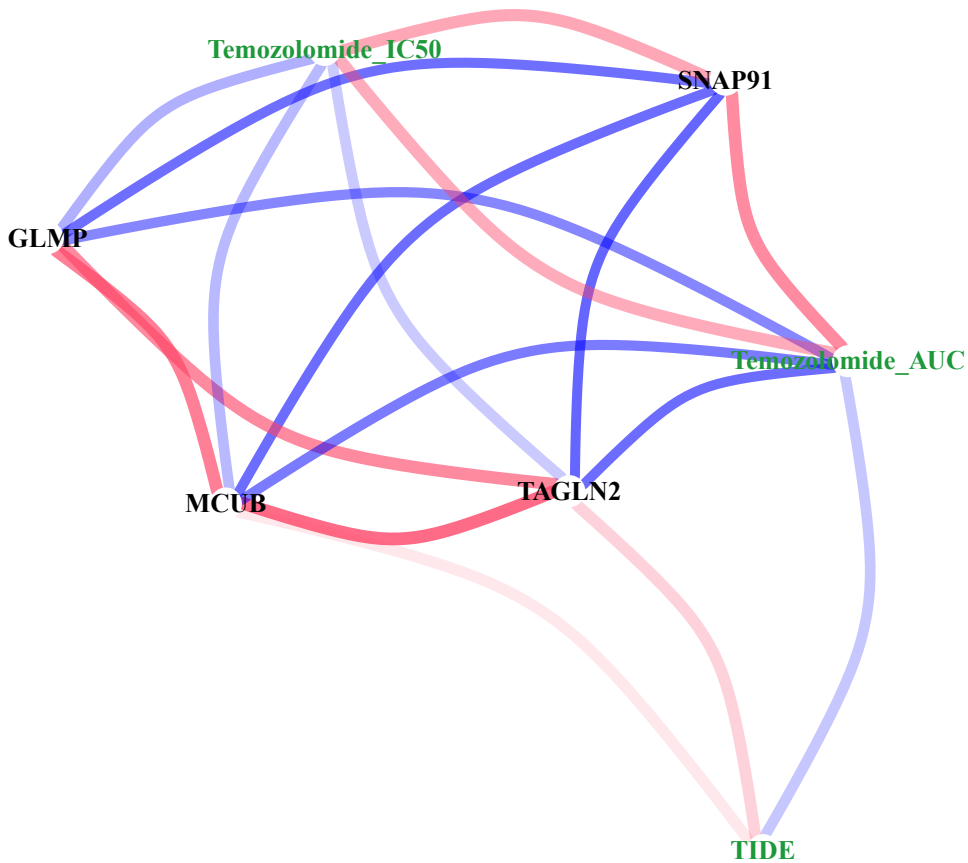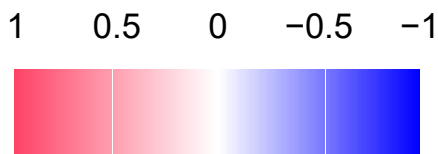

Supplement: Supplementary file 85 [file correlation.pdf › original data_lgg&metabolism/17.Model_gene/4.Response/correlation.pdf]

# SNAP91

Glioma\_GSE70630

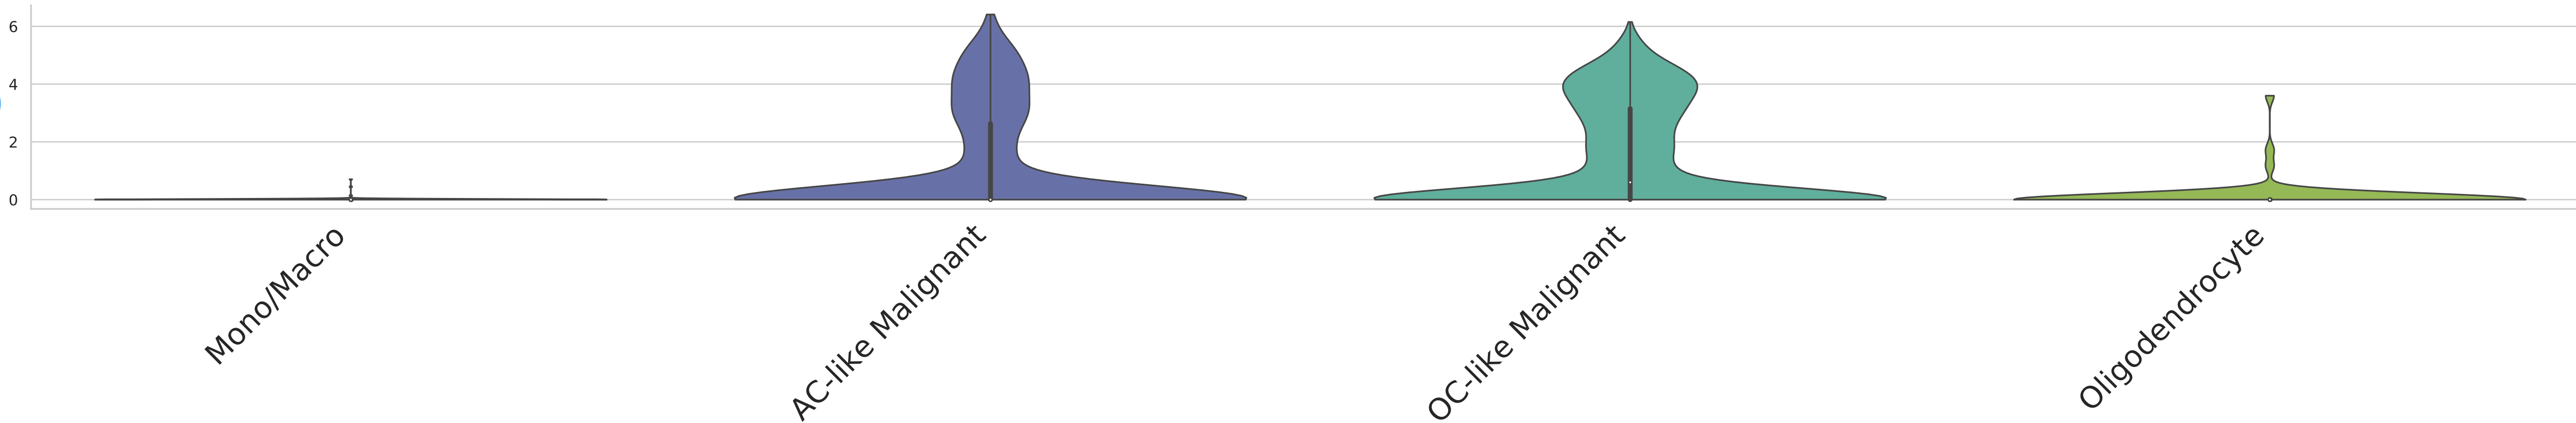

Supplement: Supplementary file 86 [file GSE70630_SNAP91_violin_multiple.pdf › original data_lgg&metabolism/17.Model_gene/5.TISCH/GSE70630_SNAP91_violin_multiple.pdf]

# SNAP91

Glioma\_GSE89567

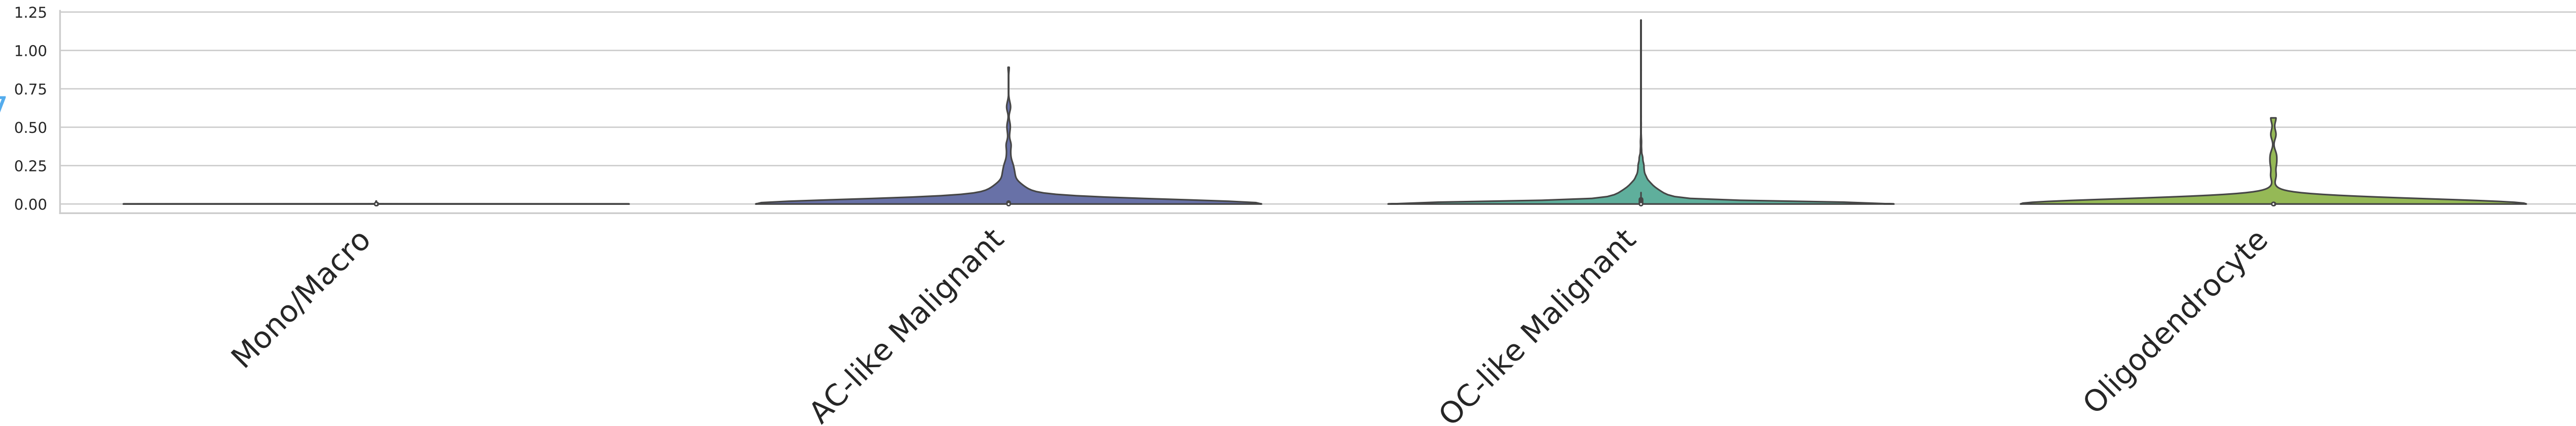

Supplement: Supplementary file 87 [file GSE89567_SNAP91_violin_multiple.pdf › original data_lgg&metabolism/17.Model_gene/5.TISCH/GSE89567_SNAP91_violin_multiple.pdf]

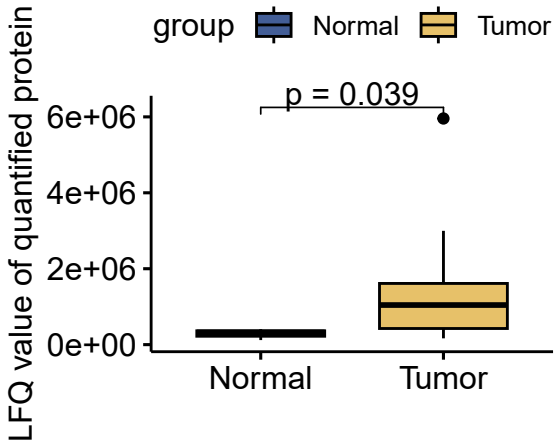

Supplement: Supplementary file 88 [file TAGLN2.pdf › original data_lgg&metabolism/18.SA_chort/TAGLN2.pdf]

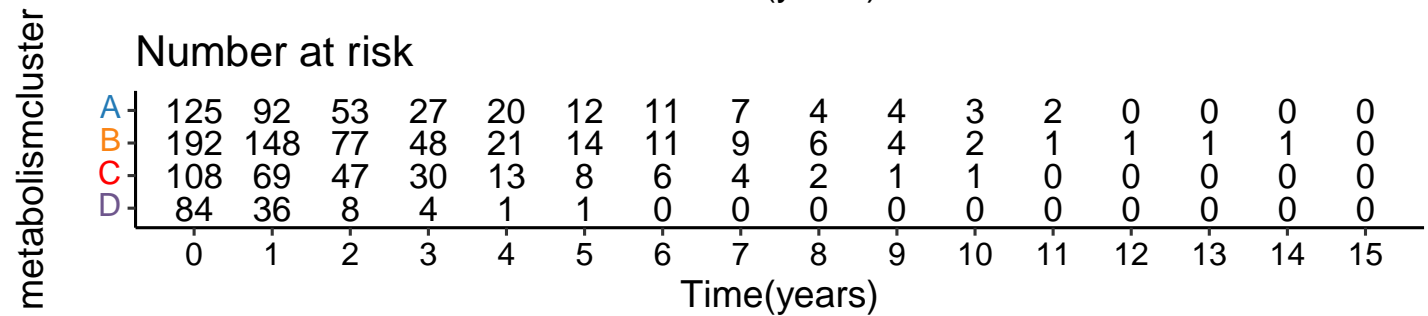

Supplement: Supplementary file 91 [file survival.PFI.pdf › original data_lgg&metabolism/4.SubtypeSur/survival.PFI.pdf]

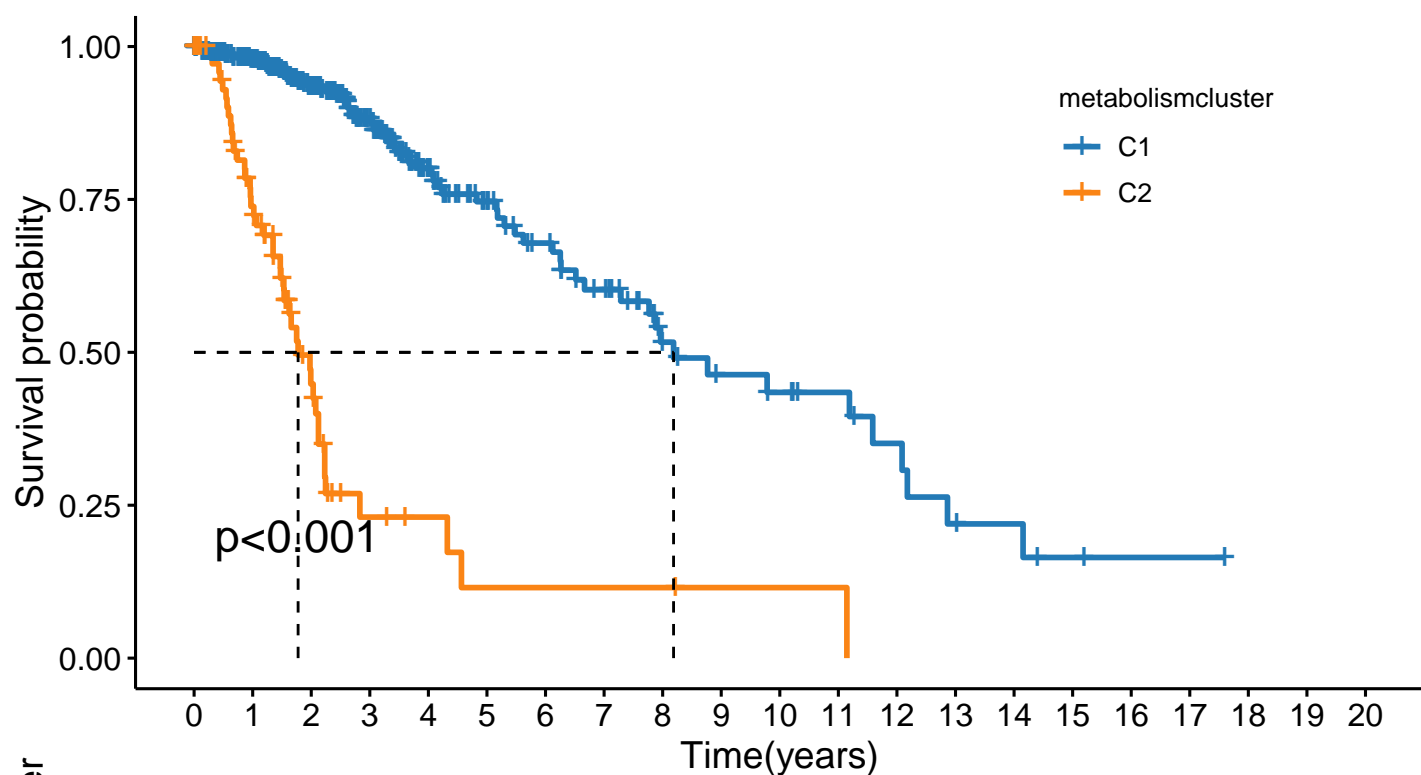

metabolismcluster

### Number at risk

|    | 0   | 1   | 2   | 3   | 4  | 5  | 6  | 7  | 8  | 9  | 10 | 11 | 12 | 13 | 14 | 15 | 16 | 17 | 18 | 19 | 20 |
|----|-----|-----|-----|-----|----|----|----|----|----|----|----|----|----|----|----|----|----|----|----|----|----|
| C1 | 420 | 334 | 213 | 143 | 80 | 59 | 47 | 36 | 20 | 16 | 14 | 11 | 8  | 5  | 4  | 2  | 1  | 1  | 0  | 0  | 0  |
| C2 | 81  | 48  | 19  | 6   | 4  | 2  | 2  | 2  | 2  | 1  | 1  | 1  | 0  | 0  | 0  | 0  | 0  | 0  | 0  | 0  | 0  |
|    | 0   | 1   | 2   | 3   | 4  | 5  | 6  | 7  | 8  | 9  | 10 | 11 | 12 | 13 | 14 | 15 | 16 | 17 | 18 | 19 | 20 |

Time(years)

Supplement: Supplementary file 92 [file survival.DSS.pdf › original data_lgg&metabolism/5.NewSubtypeSur/survival.DSS.pdf]

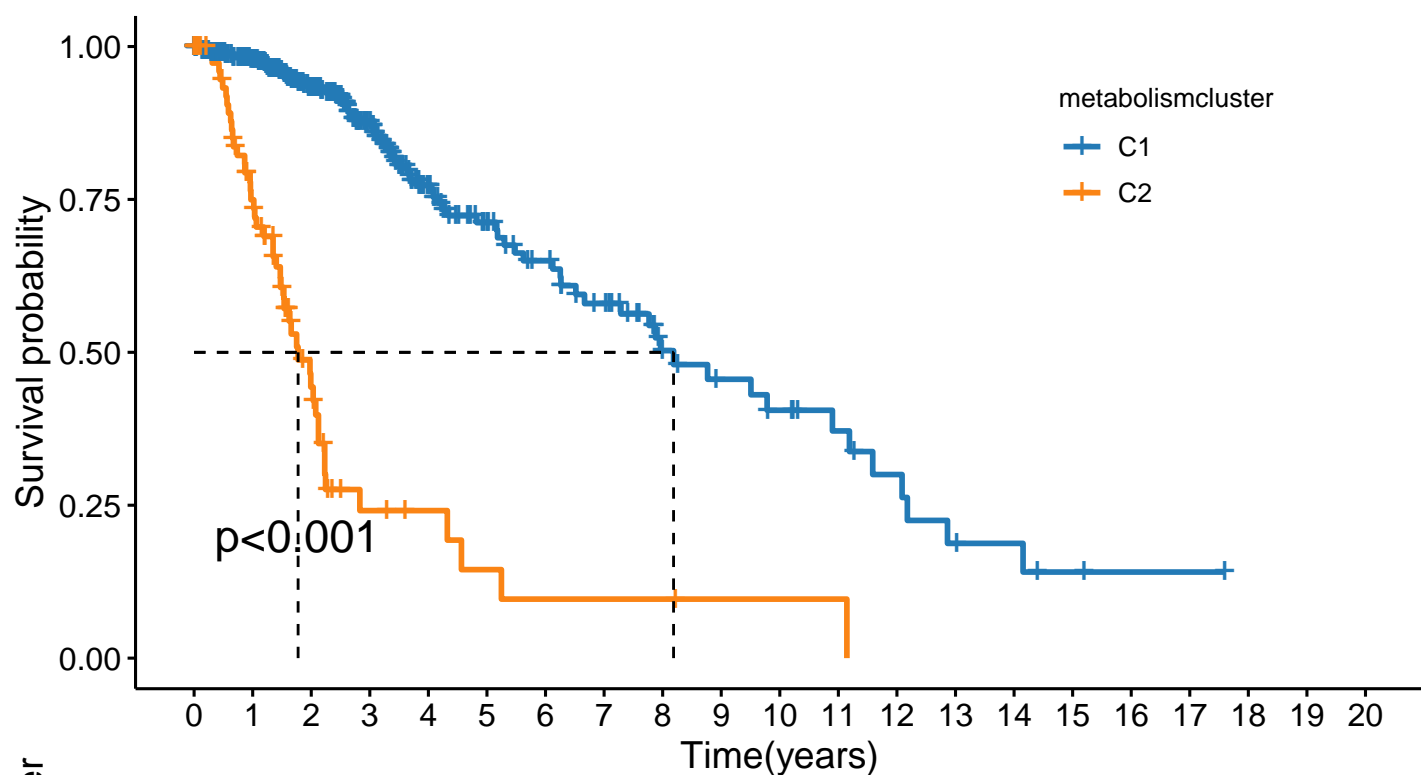

metabolismcluster

### Number at risk

|    | 0   | 1   | 2   | 3   | 4  | 5  | 6  | 7  | 8  | 9  | 10 | 11 | 12 | 13 | 14 | 15 | 16 | 17 | 18 | 19 | 20 |
|----|-----|-----|-----|-----|----|----|----|----|----|----|----|----|----|----|----|----|----|----|----|----|----|
| C1 | 425 | 339 | 218 | 148 | 83 | 61 | 49 | 38 | 22 | 18 | 15 | 11 | 8  | 5  | 4  | 2  | 1  | 1  | 0  | 0  | 0  |
| C2 | 84  | 51  | 20  | 7   | 5  | 3  | 2  | 2  | 2  | 1  | 1  | 1  | 0  | 0  | 0  | 0  | 0  | 0  | 0  | 0  | 0  |
|    | 0   | 1   | 2   | 3   | 4  | 5  | 6  | 7  | 8  | 9  | 10 | 11 | 12 | 13 | 14 | 15 | 16 | 17 | 18 | 19 | 20 |

Time(years)

Supplement: Supplementary file 93 [file survival.OS.pdf › original data_lgg&metabolism/5.NewSubtypeSur/survival.OS.pdf]

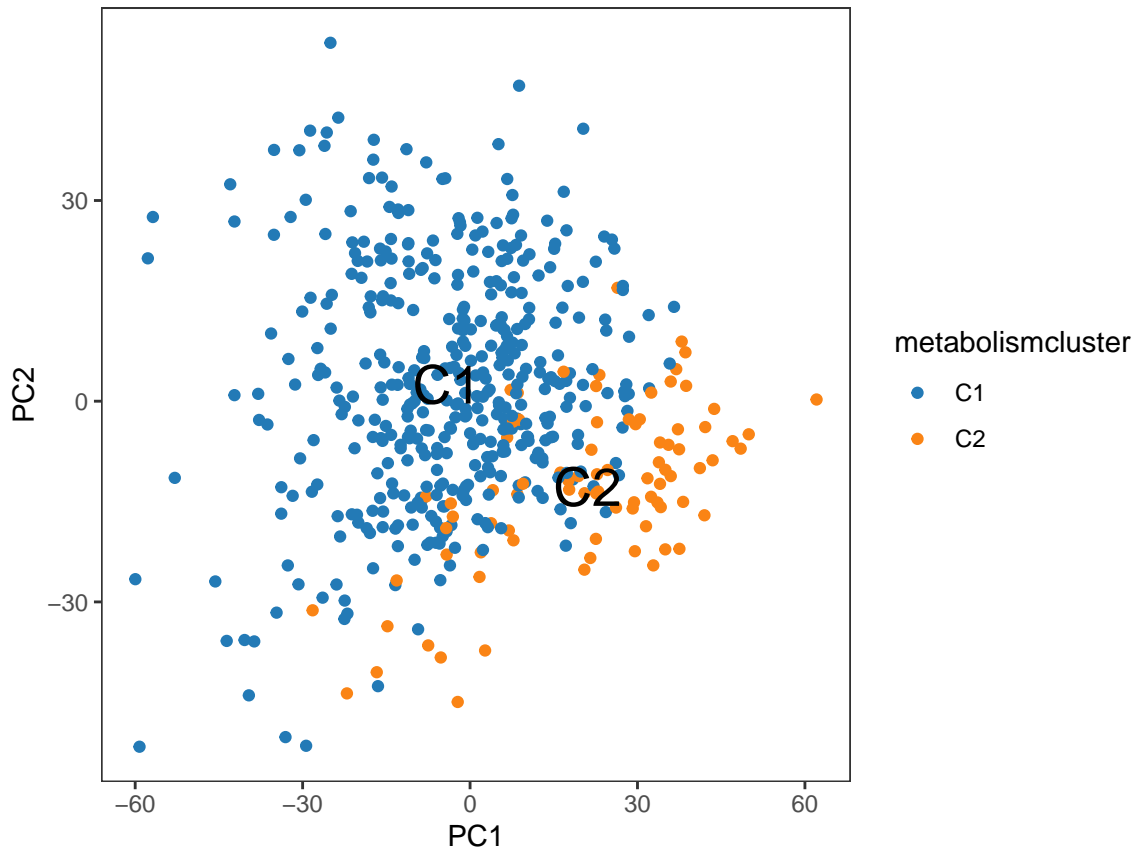

Supplement: Supplementary file 95 [file PCA.pdf › original data_lgg&metabolism/6.PCA_tSNE/PCA.pdf]

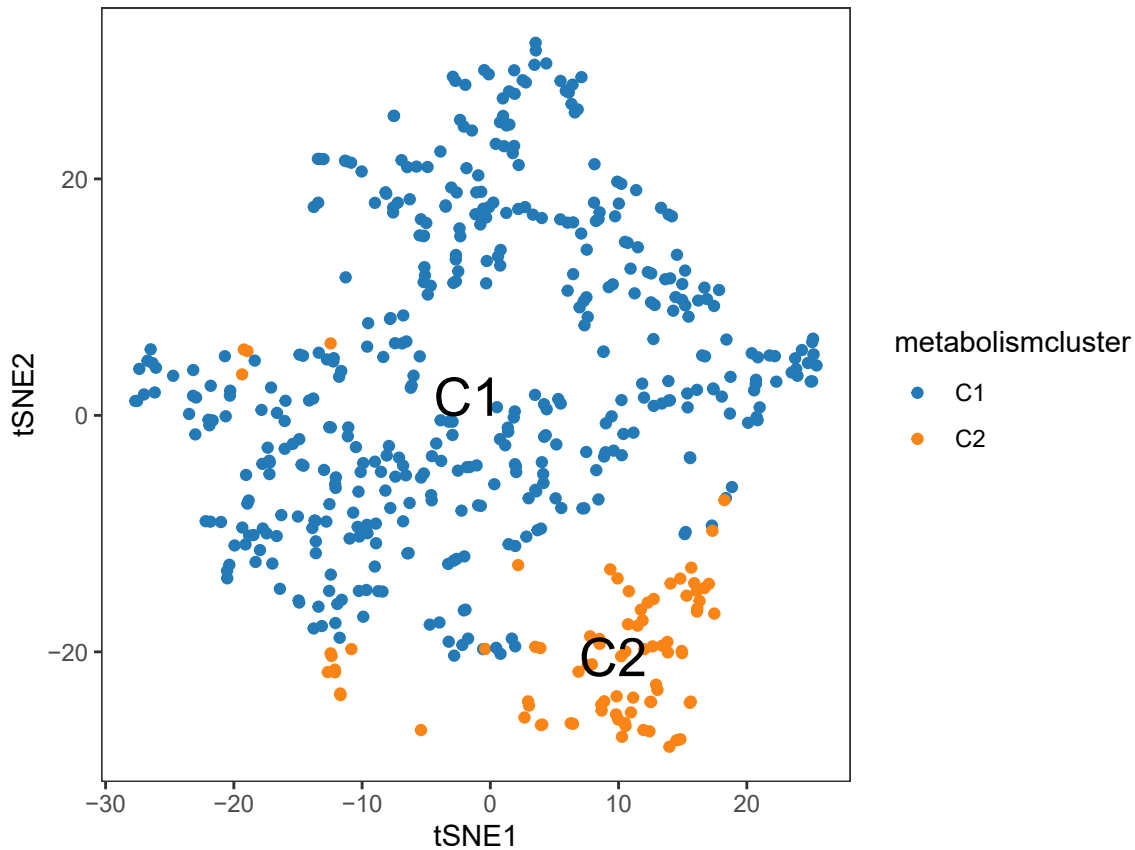

Supplement: Supplementary file 96 [file t-SNE.pdf › original data_lgg&metabolism/6.PCA_tSNE/t-SNE.pdf]

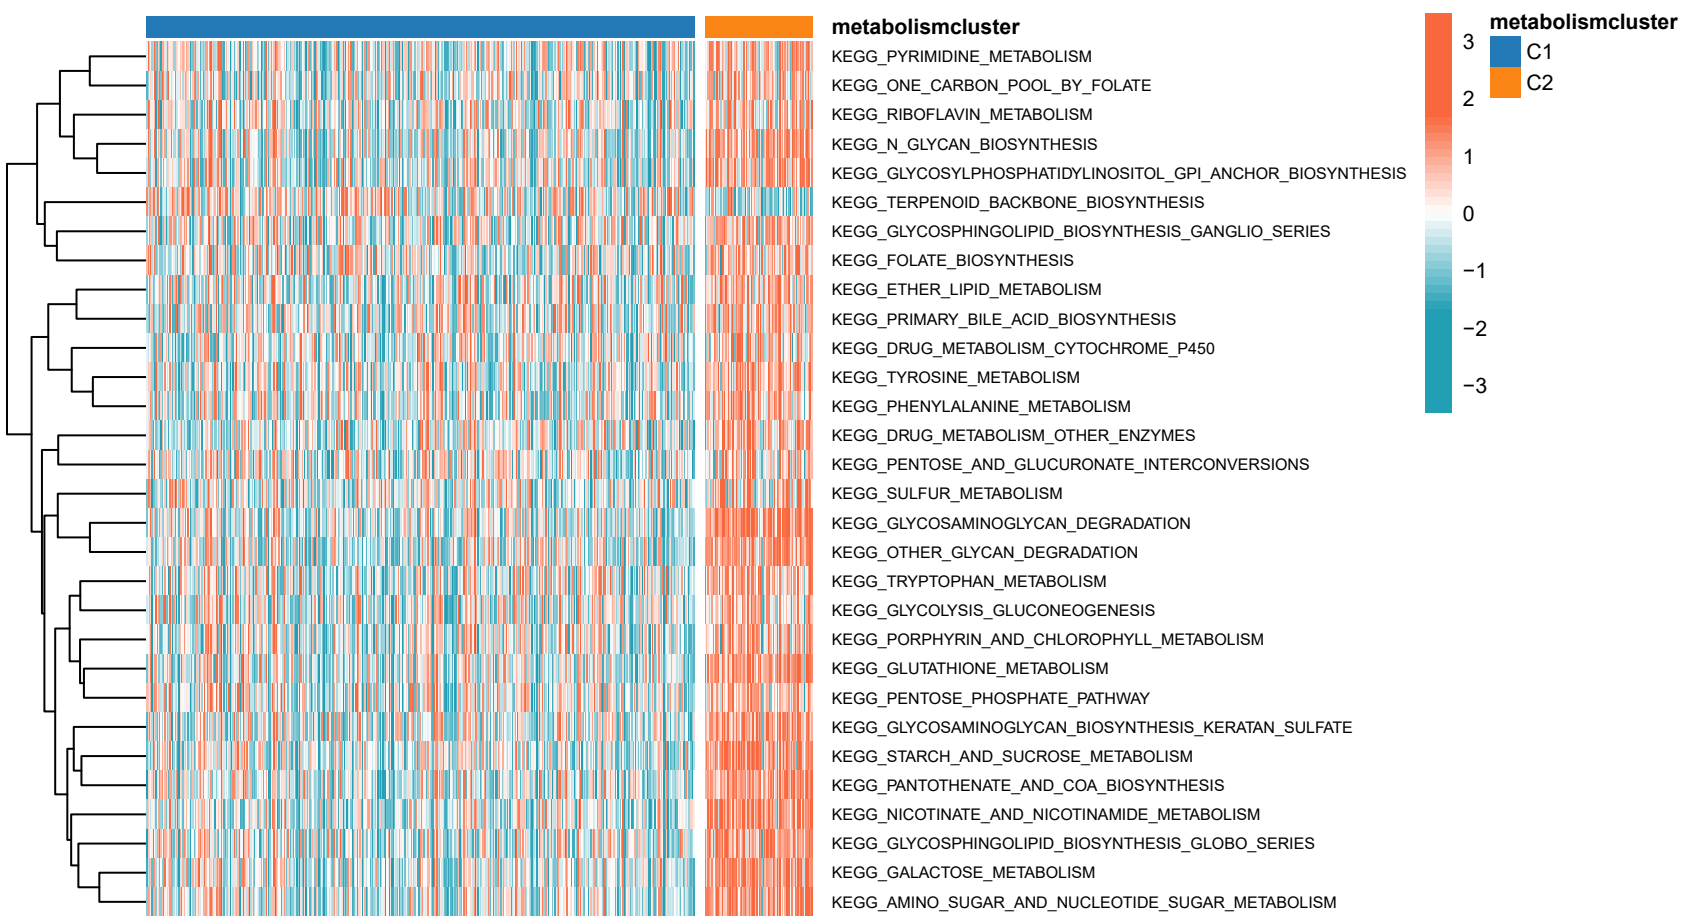

Supplement: Supplementary file 97 [file C2-C1.heatmap.pdf › original data_lgg&metabolism/7.GSVA_metabolism/C2-C1.heatmap.pdf]

Percent weight

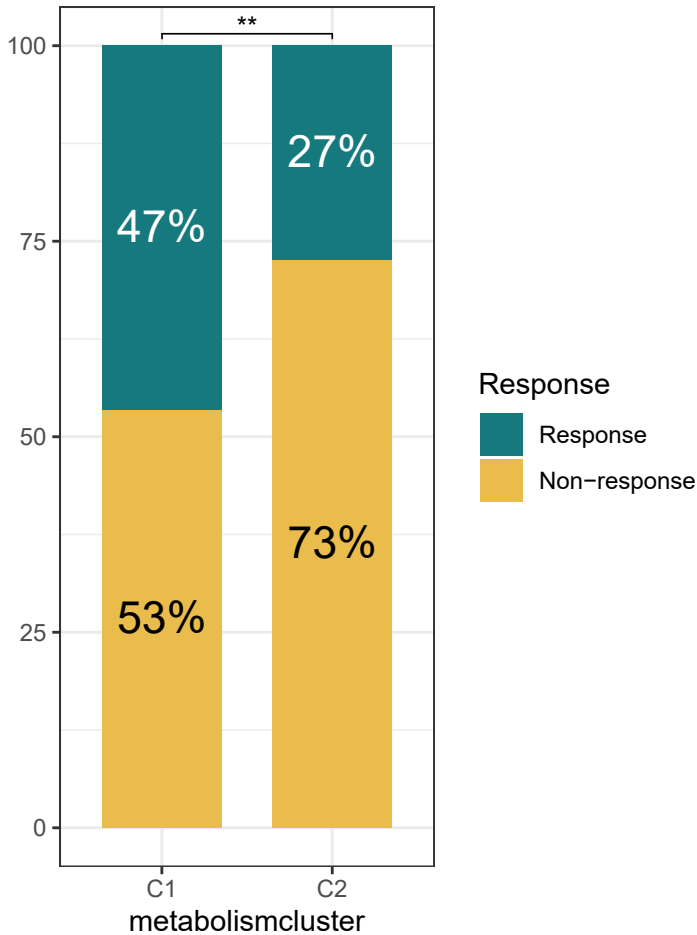

Supplement: Supplementary file 98 [file barplot.pdf › original data_lgg&metabolism/8.TIDE/barplot.pdf]

metabolismcluster

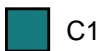

C1

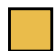

C2

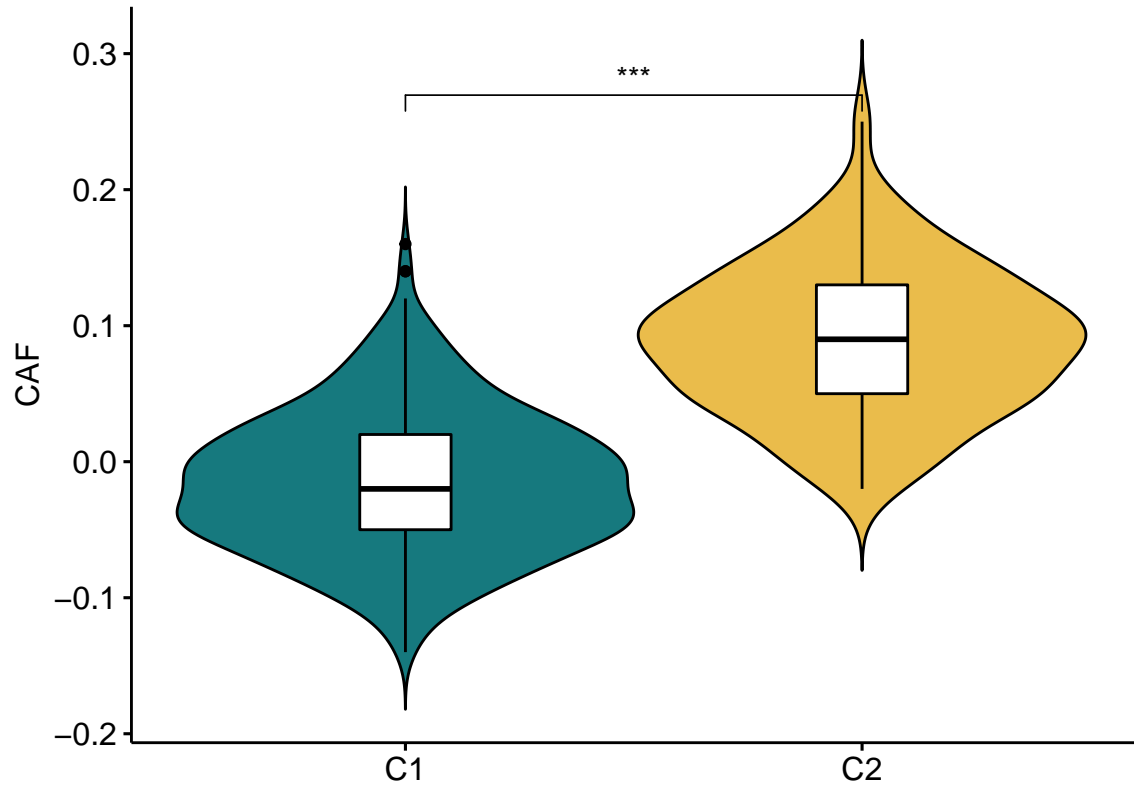

Supplement: Supplementary file 99 [file violin.CAF.pdf › original data_lgg&metabolism/8.TIDE/violin.CAF.pdf]

metabolismcluster C1 C2

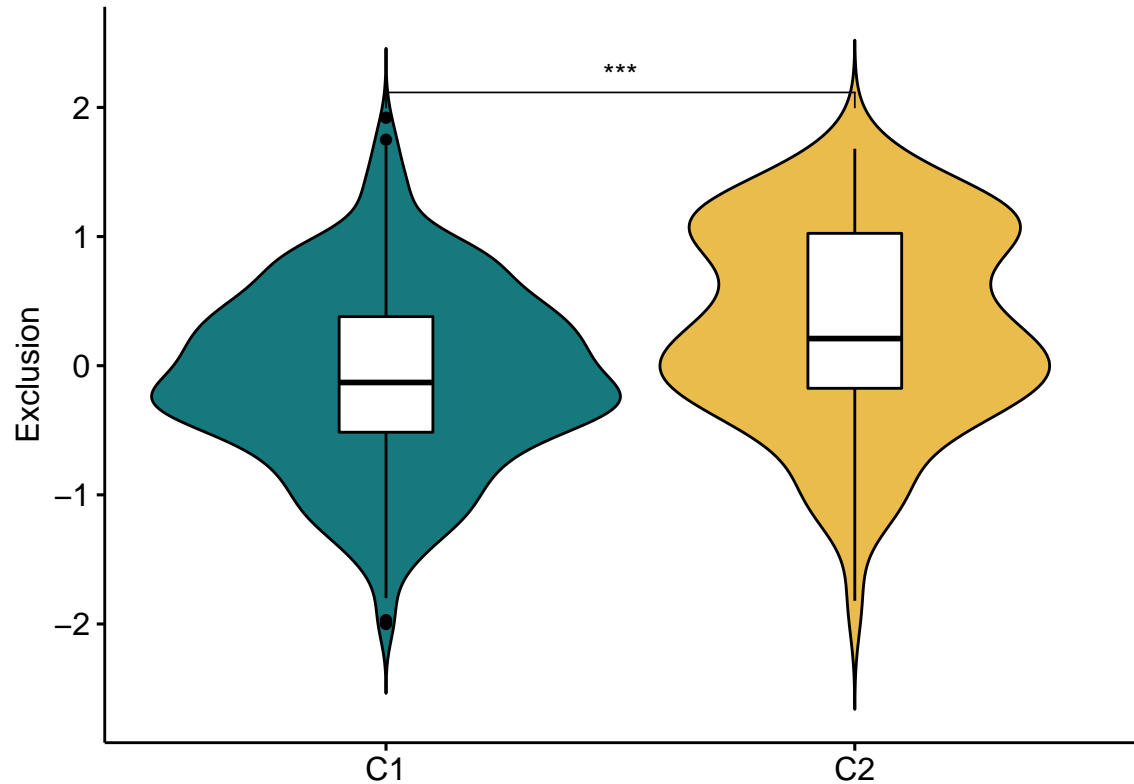

Supplement: Supplementary file 100 [file violin.Exclusion.pdf › original data_lgg&metabolism/8.TIDE/violin.Exclusion.pdf]

metabolismcluster

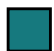

C1

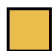

C2

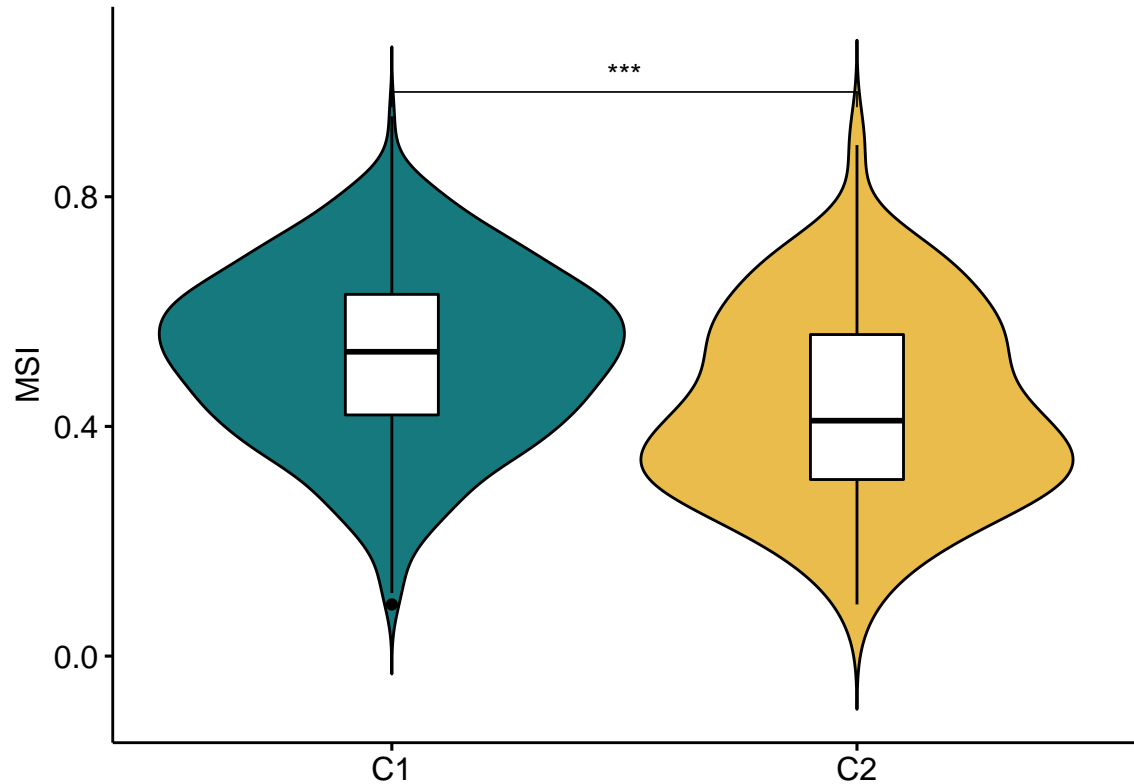

Supplement: Supplementary file 101 [file violin.MSI.pdf › original data_lgg&metabolism/8.TIDE/violin.MSI.pdf]

metabolismcluster C1 C2

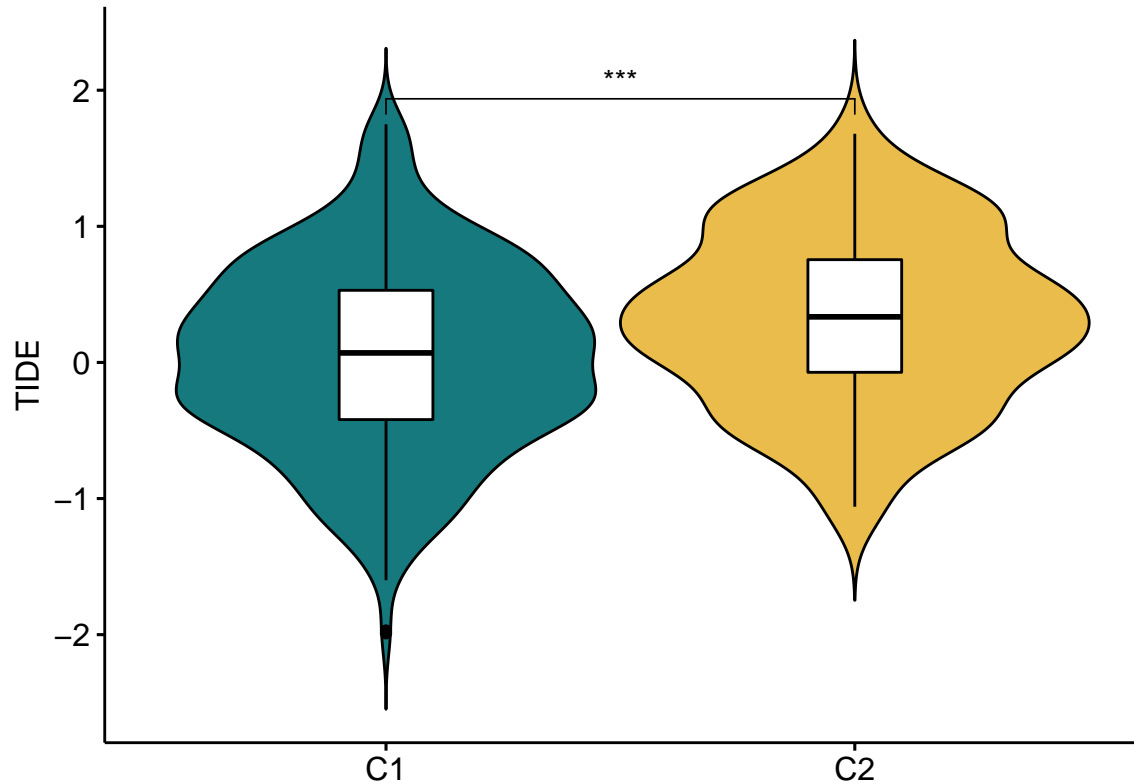

Supplement: Supplementary file 102 [file violin.TIDE.pdf › original data_lgg&metabolism/8.TIDE/violin.TIDE.pdf]

Altered in 410 (98.56%) of 416 samples.

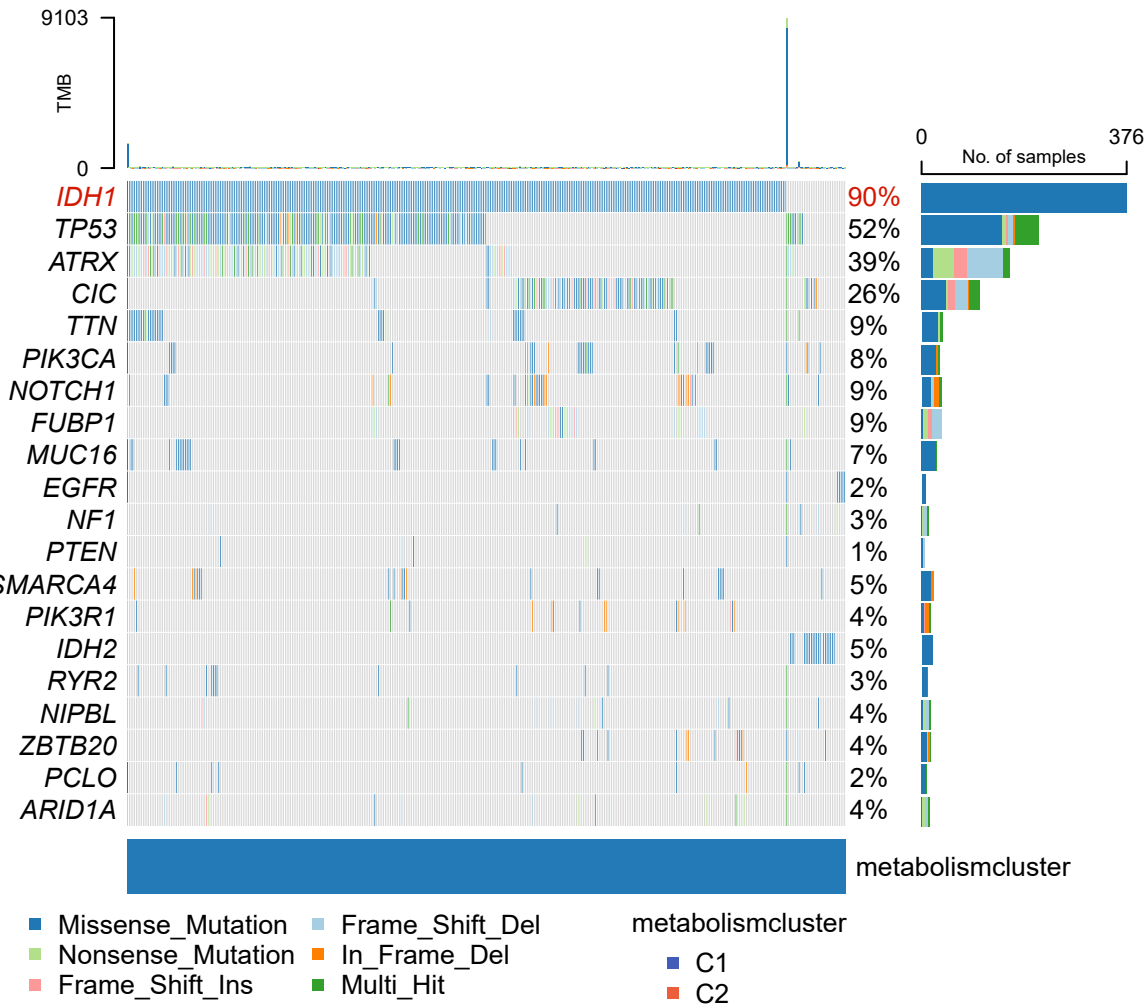

Supplement: Supplementary file 103 [file C1.pdf › original data_lgg&metabolism/9.mutation/2.Maftools/C1.pdf]

# Altered in 69 (83.13%) of 83 samples.

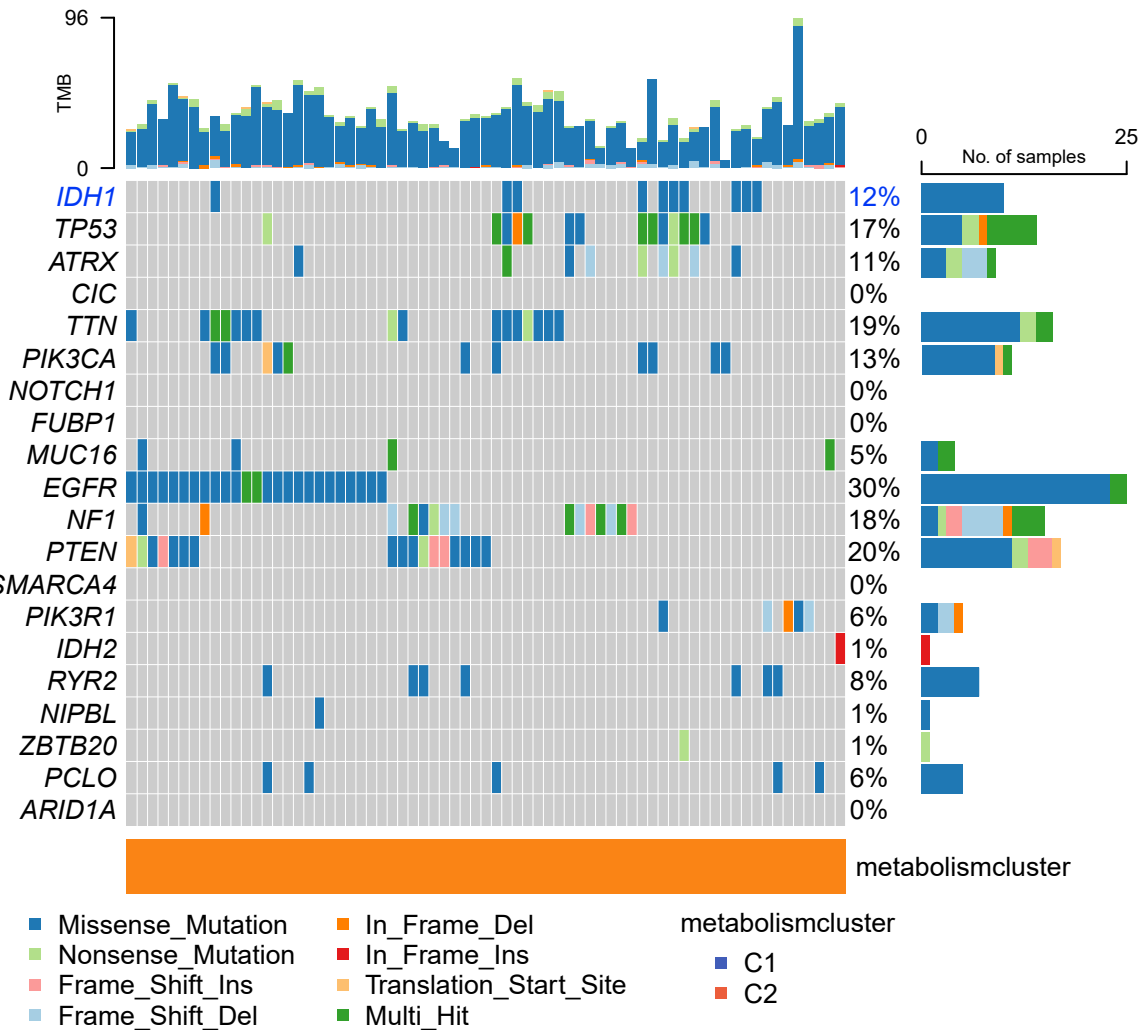

Supplement: Supplementary file 104 [file C2.pdf › original data_lgg&metabolism/9.mutation/2.Maftools/C2.pdf]
